# Supplementary material for: A fungal core effector exploits the OsPUX8B.2–OsCDC48-6 module to suppress plant immunity
Source: Research Square preprint supplement (doi:10.21203/rs.3.rs-3085022/v1), 2023-07-18
Supplement: Supplementary file 1 [file 0b71a30abd20170bdce1ff60.xlsx]

## Sheet: -MG132
Extended Data Table 4. Proteins probed by OsPUX8B.2-TurboID-HA using proximity-labeling spectrometry (-MG132).
Protein ID	Description	(PUX8B.2+biotin)_vs_(PUX8B.2－biotin)_p.val	(PUX8B.2+biotin)_vs_(PUX8B.2－biotin)_p.adj	(PUX8B.2+biotin)_vs_(PUX8B.2－biotin)_ratio	(PUX8B.2－biotin)_centered	(PUX8B.2+biotin)_centered
LOC_Os01g01060.1	40S ribosomal protein S5, putative, expressed	0.467776	0.76	-0.224	1.43	1.21
LOC_Os01g02020.1	acetyl-CoA acetyltransferase, cytosolic, putative, expressed	0.0893738	0.321	1.41	-3.18	-1.78
LOC_Os01g02880.1	fructose-bisphospate aldolase isozyme, putative, expressed	0.593786	0.806	0.81	-2.3	-1.49
LOC_Os01g03070.1	transposon protein, putative, unclassified, expressed	0.0105396	0.0379	3.15	-3.16	-0.0127
LOC_Os01g03390.1	BBTI7 - Bowman-Birk type bran trypsin inhibitor precursor, expressed	0.0145414	0.0506	-3.7	0.952	-2.75
LOC_Os01g03760.1	expressed protein	0.329244	0.677	0.335	0.244	0.579
LOC_Os01g04730.1	ribosomal protein L24, putative, expressed	0.755328	0.843	0.111	1.78	1.89
LOC_Os01g04780.1	retrotransposon protein, putative, unclassified, expressed	0.385595	0.717	1.41	-2.16	-0.754
LOC_Os01g05060.1	mitochondrial glycoprotein, putative, expressed	0.0223127	0.0829	-1.61	1.76	0.154
LOC_Os01g05070.1	expressed protein	0.156128	0.442	0.595	-1.36	-0.762
LOC_Os01g05560.1	expressed protein	0.471967	0.762	-1.64	0.126	-1.51
LOC_Os01g06010.1	Core histone H2A/H2B/H3/H4 domain containing protein, putative, expressed	0.654791	0.822	0.204	1.47	1.67
LOC_Os01g07760.2	phospholipase D, putative, expressed	0.538255	0.788	0.836	-0.946	-0.109
LOC_Os01g07810.1	protein of unknown function domain containing protein, expressed	0.828981	0.856	-0.2	0.682	0.482
LOC_Os01g08930.1	DEAD-box ATP-dependent RNA helicase, putative, expressed	0.0825618	0.308	3.33	-2.85	0.484
LOC_Os01g08970.1	SSRP1-like FACT complex subunit, putative, expressed	0.16765	0.467	2.23	-3.24	-1.01
LOC_Os01g09000.1	glutaminyl-tRNA synthetase, putative, expressed	0.46282	0.758	0.61	-2.3	-1.69
LOC_Os01g09540.1	HAD superfamily phosphatase, putative, expressed	0.0493041	0.207	-1.2	1.01	-0.184
LOC_Os01g09560.1	mitochondrial-processing peptidase subunit alpha, mitochondrial precursor, putative, expressed	0.252012	0.6	1.76	-1.86	-0.0983
LOC_Os01g09890.1	translation initiation factor SUI1, putative, expressed	0.235718	0.58	0.385	-0.214	0.171
LOC_Os01g10820.1	ribosomal protein L5, putative, expressed	0.478714	0.765	-0.207	0.611	0.404
LOC_Os01g14830.1	ribosomal protein L3, putative, expressed	0.500336	0.774	0.987	-1.75	-0.758
LOC_Os01g14950.1	importin subunit alpha, putative, expressed	0.890127	0.865	0.0525	-0.324	-0.272
LOC_Os01g15600.1	PUR ALPHA-1, putative, expressed	0.435848	0.745	-1.08	-0.764	-1.85
LOC_Os01g16010.2	BCAS2 protein, putative, expressed	0.499142	0.773	0.357	-1.52	-1.16
LOC_Os01g16090.1	RNA binding protein, putative, expressed	0.0824029	0.307	-2.56	-0.484	-3.05
LOC_Os01g16870.1	argonaute, putative, expressed	0.110486	0.354	0.576	0.437	1.01
LOC_Os01g17150.1	plastid-specific 50S ribosomal protein 5, chloroplast precursor, putative, expressed	0.567397	0.798	0.239	0.263	0.501
LOC_Os01g18050.1	tubulin/FtsZ domain containing protein, putative, expressed	0.707371	0.834	-0.16	-0.976	-1.14
LOC_Os01g19450.1	ATP-citrate synthase subunit 1, putative, expressed	0.724387	0.837	-0.135	1.24	1.1
LOC_Os01g22490.1	40S ribosomal protein S27a, putative, expressed	0.148415	0.43	0.539	-0.366	0.173
LOC_Os01g24680.1	3-hydroxyacyl-CoA dehydrogenase, putative, expressed	0.566209	0.797	-1.02	-0.449	-1.47
LOC_Os01g24690.1	60S ribosomal protein L23A, putative, expressed	0.421584	0.737	0.435	1.64	2.07
LOC_Os01g25330.2	SAC9, putative, expressed	0.708068	0.834	0.617	-2.25	-1.64
LOC_Os01g25610.1	40S ribosomal protein S4, putative, expressed	0.836624	0.857	0.0594	1.77	1.83
LOC_Os01g32730.1	tetratricopeptide repeat containing protein, putative, expressed	0.351676	0.694	-0.468	0.0345	-0.434
LOC_Os01g36860.1	DEAD-box ATP-dependent RNA helicase 40, putative, expressed	0.322803	0.672	0.82	0.932	1.75
LOC_Os01g39260.1	OsFtsH5 FtsH protease, homologue of AtFtsH4, expressed	0.881054	0.864	-0.157	-0.428	-0.586
LOC_Os01g43030.1	tetratricopeptide repeat domain containing protein, expressed	0.205958	0.536	1.54	-1.91	-0.369
LOC_Os01g43120.1	DEAD/DEAH box helicase, putative, expressed	0.208564	0.54	1.74	-1.32	0.421
LOC_Os01g45274.1	carbonic anhydrase, chloroplast precursor, putative, expressed	0.0394563	0.164	-0.717	-0.772	-1.49
LOC_Os01g46510.1	peptidase S8 and S53, subtilisin, kexin, sedolisin, putative, expressed	0.67774	0.827	-0.374	-0.472	-0.846
LOC_Os01g47330.1	ribosomal protein L7/L12 C-terminal domain containing protein, expressed	0.220414	0.558	2.7	-2.89	-0.194
LOC_Os01g47660.1	60S ribosomal protein L18a, putative, expressed	0.134596	0.406	-0.578	1.57	0.988
LOC_Os01g48690.1	ribosomal protein rpS20, putative, expressed	0.341052	0.686	-1.26	1.55	0.287
LOC_Os01g49190.1	ATP synthase, putative, expressed	0.963257	0.875	-0.0887	-1.57	-1.66
LOC_Os01g49290.1	WD repeat-containing protein, putative, expressed	0.0766242	0.295	-1.59	-0.156	-1.75
LOC_Os01g50360.1	NAC domain containing protein, putative, expressed	0.948447	0.873	-0.0563	-0.748	-0.804
LOC_Os01g51170.1	glycylpeptide N-tetradecanoyltransferase 1, putative, expressed	0.232881	0.576	-0.852	-0.0352	-0.888
LOC_Os01g51300.1	WD domain, G-beta repeat domain containing protein, expressed	0.252102	0.6	-2.1	-0.719	-2.82
LOC_Os01g51380.1	ATP synthase, putative, expressed	0.686536	0.829	-0.919	-0.222	-1.14
LOC_Os01g52390.1	plasminogen activator inhibitor 1 RNA-binding protein, putative, expressed	0.602102	0.808	0.289	-0.495	-0.206
LOC_Os01g53890.1	RNA methyltransferase, TrmH family protein, putative, expressed	0.064062	0.261	3.61	-3.23	0.379
LOC_Os01g53930.1	hexokinase, putative, expressed	0.543726	0.79	0.858	-0.786	0.072
LOC_Os01g54540.1	ribosomal protein L13, putative, expressed	0.185908	0.502	-0.693	1.49	0.797
LOC_Os01g55270.1	SGS domain containing protein, expressed	0.00800081	0.0313	3.78	-3.54	0.239
LOC_Os01g55830.1	glutathione S-transferase, putative, expressed	0.0272687	0.106	1.55	-1.41	0.136
LOC_Os01g57958.1	chloroplast 50S ribosomal protein L16, putative, expressed	0.909189	0.868	0.0577	-0.678	-0.62
LOC_Os01g58020.1	ribulose bisphosphate carboxylase large chain precursor, putative, expressed	0.171764	0.475	-0.884	2.01	1.13
LOC_Os01g59510.1	chloroplast ribonuclease III domain protein, putative, expressed	0.161894	0.455	2.47	-1.77	0.696
LOC_Os01g59990.2	ribosomal protein L24, putative, expressed	0.940042	0.872	0.0278	0.439	0.467
LOC_Os01g60440.1	HEAT repeat family protein, putative, expressed	0.707441	0.834	-0.516	-1.55	-2.07
LOC_Os01g60660.1	methionyl-tRNA synthetase, putative, expressed	0.893001	0.866	0.107	-0.136	-0.0286
LOC_Os01g60790.1	40S ribosomal protein S26, putative, expressed	0.0774689	0.297	3.02	-2.28	0.743
LOC_Os01g61814.1	40S ribosomal protein S23, putative, expressed	0.0696614	0.277	0.714	-0.657	0.0567
LOC_Os01g62290.1	DnaK family protein, putative, expressed	0.227101	0.568	0.801	-0.063	0.738
LOC_Os01g63220.3	kinase, pfkB family, putative, expressed	0.882603	0.864	-0.0915	-0.0669	-0.158
LOC_Os01g64090.1	L1P family of ribosomal proteins domain containing protein, expressed	0.785329	0.849	-0.114	0.936	0.822
LOC_Os01g64860.1	OsSub11 - Putative Subtilisin homologue, expressed	0.430657	0.742	-0.249	0.874	0.626
LOC_Os01g64960.1	chlorophyll A-B binding protein, putative, expressed	0.488017	0.769	-0.343	1.02	0.675
LOC_Os01g66560.1	signal recognition particle 72 kDa protein, putative, expressed	0.793039	0.85	-0.0696	1.61	1.54
LOC_Os01g67120.1	rhodanese-like domain containing protein, putative, expressed	0.316856	0.666	-2.43	1.49	-0.941
LOC_Os01g67134.1	ribosomal L18p/L5e family protein, putative, expressed	0.025086	0.096	0.961	1.39	2.35
LOC_Os01g67570.1	PDE312/PTAC10, putative, expressed	0.659968	0.823	-0.135	-0.825	-0.96
LOC_Os01g67590.1	oligopeptidase, putative, expressed	0.948453	0.873	-0.0642	-1.11	-1.18
LOC_Os01g67860.1	fructose-bisphospate aldolase isozyme, putative, expressed	0.326991	0.675	-0.451	2.19	1.74
LOC_Os01g69950.1	ribosomal protein L27, putative, expressed	0.0354959	0.145	1.1	0.465	1.57
LOC_Os01g69970.1	WD domain, G-beta repeat domain containing protein, expressed	0.758106	0.844	-0.235	-1.03	-1.26
LOC_Os01g70020.1	DEK C terminal domain containing protein, expressed	0.76674	0.846	-0.158	1.49	1.34
LOC_Os01g70090.1	enoyl-CoA hydratase/isomerase family protein, putative, expressed	0.894253	0.866	0.091	-0.674	-0.583
LOC_Os01g71090.1	xylanase inhibitor, putative, expressed	0.147569	0.429	-1.62	0.773	-0.848
LOC_Os01g72890.1	transposon protein, putative, CACTA, En/Spm sub-class, expressed	0.129122	0.395	0.918	0.302	1.22
LOC_Os01g73160.1	40S ribosomal protein S10, putative, expressed	0.636982	0.817	0.222	-1.11	-0.886
LOC_Os01g73170.1	peroxidase precursor, putative, expressed	0.948731	0.873	-0.0868	-0.889	-0.976
LOC_Os02g01070.1	FG-GAP repeat-containing protein, putative, expressed	0.380866	0.714	-0.833	-0.073	-0.906
LOC_Os02g01332.1	ribosomal protein L6, putative, expressed	0.84749	0.859	-0.0567	0.791	0.734
LOC_Os02g01440.1	nitric oxide synthase 1, putative, expressed	0.65916	0.823	0.777	-2.36	-1.58
LOC_Os02g01740.1	U5 small nuclear ribonucleoprotein 200 kDa helicase, putative, expressed	0.915451	0.869	-0.177	-0.987	-1.16
LOC_Os02g02130.1	ribosomal protein L37, putative, expressed	0.138552	0.413	0.747	0.358	1.1
LOC_Os02g02400.1	catalase isozyme A, putative, expressed	0.194793	0.518	-2.01	0.117	-1.89
LOC_Os02g02410.1	DnaK family protein, putative, expressed	0.911578	0.868	0.0302	0.292	0.322
LOC_Os02g02870.1	glycine-rich protein 2, putative, expressed	0.263961	0.614	-0.667	-0.261	-0.928
LOC_Os02g02890.1	peptidyl-prolyl cis-trans isomerase, putative, expressed	0.300066	0.651	-0.565	0.0641	-0.501
LOC_Os02g04460.1	ribosomal protein L3, putative, expressed	0.0278488	0.109	1.25	0.736	1.99
LOC_Os02g04480.1	cleavage and polyadenylation specificity factor, putative, expressed	0.154115	0.439	-1.74	-0.944	-2.69
LOC_Os02g07060.1	tubulin/FtsZ domain containing protein, putative, expressed	0.694955	0.831	-0.185	0.831	0.646
LOC_Os02g07260.1	phosphoglycerate kinase protein, putative, expressed	0.814533	0.854	0.0678	-0.0244	0.0434
LOC_Os02g07870.1	ATP synthase, putative, expressed	0.912696	0.868	0.119	-0.512	-0.393
LOC_Os02g07890.2	60S ribosomal protein L27a-3, putative, expressed	0.568064	0.798	-0.179	0.943	0.764
LOC_Os02g09590.1	ribosome, putative, expressed	0.113853	0.362	0.749	0.946	1.69
LOC_Os02g10390.1	chlorophyll A-B binding protein, putative, expressed	0.271251	0.622	-0.469	-0.337	-0.806
LOC_Os02g11100.1	expressed protein	0.352971	0.695	-0.543	0.917	0.374
LOC_Os02g12794.3	elongation factor 1-gamma, putative, expressed	0.782012	0.848	0.497	-2.16	-1.66
LOC_Os02g12800.2	elongation factor 1-gamma, putative, expressed	0.892825	0.866	-0.249	-0.416	-0.664
LOC_Os02g12850.1	RNA recognition motif containing protein, expressed	0.154812	0.44	-0.635	-1.13	-1.76
LOC_Os02g13530.1	40S ribosomal protein S24, putative, expressed	0.0422273	0.177	0.763	0.604	1.37
LOC_Os02g13840.1	citrate synthase, putative, expressed	0.28667	0.639	-0.818	0.957	0.139
LOC_Os02g15900.1	50S ribosomal protein L21, chloroplast precursor, putative, expressed	0.149692	0.432	-0.714	1.44	0.722
LOC_Os02g17390.1	3-hydroxyacyl-CoA dehydrogenase, putative, expressed	0.284584	0.636	0.402	0.333	0.735
LOC_Os02g18380.1	60S ribosomal protein L27-3, putative, expressed	0.0998933	0.338	-1.3	-0.246	-1.55
LOC_Os02g18550.1	40S ribosomal protein S3a, putative, expressed	0.82097	0.855	-0.0695	0.551	0.482
LOC_Os02g21660.1	L1P family of ribosomal proteins domain containing protein, expressed	0.85615	0.86	-0.0791	2.06	1.98
LOC_Os02g21970.1	26S protease regulatory subunit 6B, putative, expressed	0.889813	0.865	-0.162	-1.61	-1.78
LOC_Os02g24614.1	DNA-directed RNA polymerase subunit beta, putative, expressed	0.136453	0.409	1.98	-1.69	0.291
LOC_Os02g27760.1	40S ribosomal protein S15a, putative, expressed	0.511189	0.778	0.191	0.0924	0.283
LOC_Os02g28810.1	ribosomal protein, putative, expressed	0.17606	0.484	0.596	-0.627	-0.031
LOC_Os02g30050.1	ribosomal protein L29, putative, expressed	0.240755	0.586	0.54	1.21	1.75
LOC_Os02g32030.1	elongation factor, putative, expressed	0.575255	0.8	0.205	0.988	1.19
LOC_Os02g32350.2	TUDOR protein with multiple SNc domains, putative, expressed	0.823698	0.855	-0.168	0.59	0.422
LOC_Os02g33140.1	ribosomal protein, putative, expressed	0.928554	0.87	0.0299	1.57	1.6
LOC_Os02g33610.1	metallo-beta-lactamase, putative, expressed	0.452967	0.753	0.227	0.166	0.393
LOC_Os02g37862.1	60S ribosomal protein L6, putative, expressed	0.303532	0.655	-0.5	3.31	2.81
LOC_Os02g37870.1	Brix domain containing protein, putative, expressed	0.867078	0.862	0.2	-0.504	-0.304
LOC_Os02g38190.1	expressed protein	0.111791	0.357	0.708	0.0281	0.736
LOC_Os02g38210.1	elongation factor Tu, putative, expressed	0.806199	0.852	-0.0986	1.14	1.04
LOC_Os02g38820.1	expressed protein	0.843895	0.859	0.239	-1.11	-0.868
LOC_Os02g38920.1	glyceraldehyde-3-phosphate dehydrogenase, putative, expressed	0.248906	0.597	-0.54	0.833	0.293
LOC_Os02g39180.1	expressed protein	0.89235	0.866	0.104	-0.0137	0.0906
LOC_Os02g39350.1	eukaryotic translation initiation factor 2A, putative, expressed	0.0863216	0.315	-0.895	-0.645	-1.54
LOC_Os02g39720.2	splicing factor, arginine/serine-rich 7, putative, expressed	0.282772	0.635	-0.871	1.17	0.299
LOC_Os02g39820.1	PPR repeat domain containing protein, putative, expressed	0.584993	0.803	0.583	-0.605	-0.0221
LOC_Os02g39920.1	AT hook motif family protein, expressed	0.224875	0.565	-0.677	1.06	0.381
LOC_Os02g40880.1	ribosomal protein L14, putative, expressed	0.948038	0.873	0.0872	0.306	0.393
LOC_Os02g42310.1	OsSCP8 - Putative Serine Carboxypeptidase homologue, expressed	0.516809	0.78	-1.08	0.0415	-1.04
LOC_Os02g42860.1	DEAD-box ATP-dependent RNA helicase, putative, expressed	0.611105	0.811	-0.329	-0.367	-0.696
LOC_Os02g43020.1	heat shock protein STI, putative, expressed	0.0059076	0.0214	3.48	-1.44	2.04
LOC_Os02g43600.1	50S ribosomal protein L19, chloroplast precursor, putative, expressed	0.100822	0.34	1.1	-0.331	0.766
LOC_Os02g45070.1	PINHEAD, putative, expressed	0.481176	0.766	0.561	-0.294	0.267
LOC_Os02g46130.1	tRNA synthetases class II domain containing protein, expressed	0.728135	0.838	-0.16	-0.659	-0.819
LOC_Os02g46510.1	adaptor complexes medium subunit family domain containing protein, expressed	0.512251	0.778	-0.358	-0.166	-0.524
LOC_Os02g47140.1	L11 domain containing ribosomal protein, putative, expressed	0.761407	0.845	-0.13	1.21	1.07
LOC_Os02g48010.1	nuclear matrix constituent protein 1-like, putative, expressed	0.606939	0.809	0.643	-1.4	-0.761
LOC_Os02g48660.1	60S ribosomal protein L31, putative, expressed	0.0612015	0.251	0.593	-0.268	0.326
LOC_Os02g48720.2	mitochondrial carrier protein, putative, expressed	0.145165	0.425	-0.489	1.98	1.49
LOC_Os02g49680.1	arsenate reductase, putative, expressed	0.141104	0.418	0.998	-1.31	-0.314
LOC_Os02g50010.1	APO, putative, expressed	0.56296	0.796	0.828	-1.96	-1.13
LOC_Os02g50550.1	dynamin, putative, expressed	0.531591	0.786	0.229	-0.185	0.0447
LOC_Os02g50690.1	GDSL-like lipase/acylhydrolase, putative, expressed	0.208931	0.541	-1.76	-0.105	-1.87
LOC_Os02g50830.1	expressed protein	0.00298676	0.00742	3.43	-4.35	-0.919
LOC_Os02g51080.1	FAD binding domain containing protein, expressed	0.946771	0.873	-0.0215	0.0339	0.0124
LOC_Os02g51790.1	ribosomal protein L29, putative, expressed	0.281082	0.633	0.727	0.214	0.941
LOC_Os02g52860.1	phosphate carrier protein, mitochondrial precursor, putative, expressed	0.31756	0.667	-0.444	0.796	0.352
LOC_Os02g54470.1	60S ribosomal protein L35a-3, putative, expressed	0.305991	0.657	0.551	1.24	1.79
LOC_Os02g54770.1	RNA recognition motif containing protein, expressed	0.0432252	0.181	-1.4	0.521	-0.878
LOC_Os02g55370.1	60S ribosomal protein L39, putative, expressed	0.0797213	0.302	-2.82	0.975	-1.84
LOC_Os02g56990.1	ribosomal protein L37, putative, expressed	0.253521	0.602	0.992	-0.206	0.786
LOC_Os02g57260.1	3-ketoacyl-CoA thiolase, peroxisomal precursor, putative, expressed	0.360645	0.7	-0.349	0.395	0.0456
LOC_Os02g57540.1	60S ribosomal protein L28-1, putative, expressed	0.884193	0.864	-0.085	0.792	0.707
LOC_Os02g57660.1	phosphatidylinositol-4-phosphate 5-kinase, putative, expressed	0.231076	0.573	0.92	-2.61	-1.69
LOC_Os02g57670.1	ribosomal L9, putative, expressed	0.707601	0.834	-0.226	-1.07	-1.3
LOC_Os02g58020.1	ABC transporter, ATP-binding protein, putative, expressed	0.439773	0.747	0.659	-1.39	-0.726
LOC_Os02g58480.1	sucrose synthase, putative, expressed	0.940046	0.872	-0.0259	0.0139	-0.012
LOC_Os03g01910.1	transcription factor BTF3, putative, expressed	0.287816	0.64	-0.761	-0.228	-0.989
LOC_Os03g03020.1	L11 domain containing ribosomal protein, putative, expressed	0.620355	0.813	-0.138	0.184	0.0464
LOC_Os03g03360.1	ribosomal protein L5, putative, expressed	0.705319	0.833	0.107	0.456	0.563
LOC_Os03g03720.1	glyceraldehyde-3-phosphate dehydrogenase, putative, expressed	0.736318	0.84	-0.108	1.47	1.36
LOC_Os03g04750.1	60S ribosomal protein L21-2, putative, expressed	0.964438	0.875	-0.0132	1.06	1.04
LOC_Os03g05830.1	transposon protein, putative, CACTA, En/Spm sub-class, expressed	0.212715	0.547	-2.41	-0.563	-2.97
LOC_Os03g05980.1	40S ribosomal protein S9-2, putative, expressed	0.440025	0.747	-0.26	1.87	1.61
LOC_Os03g06200.1	aminotransferase, putative, expressed	0.718564	0.836	-0.836	-1.02	-1.86
LOC_Os03g08020.1	elongation factor Tu, putative, expressed	0.955804	0.874	0.0173	2.48	2.5
LOC_Os03g08360.1	3-ketoacyl-CoA synthase 10, putative, expressed	0.581498	0.802	0.317	-0.342	-0.0246
LOC_Os03g08440.1	ribosomal protein S2, putative, expressed	0.834429	0.857	0.287	-0.555	-0.268
LOC_Os03g10060.1	S10/S20 domain containing ribosomal protein, putative, expressed	0.155489	0.441	-0.709	0.765	0.0567
LOC_Os03g10340.1	40S ribosomal protein S3a, putative, expressed	0.575559	0.8	0.154	1.59	1.75
LOC_Os03g11580.1	expressed protein	0.765582	0.845	-0.479	-0.831	-1.31
LOC_Os03g12020.1	50S ribosomal protein L15, chloroplast precursor, putative, expressed	0.190794	0.511	0.402	0.859	1.26
LOC_Os03g12590.1	coatomer subunit gamma-1, putative, expressed	0.465568	0.759	0.517	-1.47	-0.955
LOC_Os03g13540.1	Ser/Thr protein phosphatase family protein, putative, expressed	0.771088	0.846	0.127	-0.622	-0.495
LOC_Os03g13730.1	translocase of chloroplast 34, putative, expressed	0.963138	0.875	0.0321	-1.24	-1.21
LOC_Os03g15870.1	ribosomal protein L4, putative, expressed	0.162223	0.456	0.603	1.43	2.03
LOC_Os03g15900.2	SH3 domain containing protein, expressed	0.998812	0.879	-0.00102	-0.628	-0.629
LOC_Os03g17010.1	RNA recognition motif containing protein, putative, expressed	0.814251	0.854	0.0819	1.02	1.1
LOC_Os03g17710.1	splicing factor, arginine/serine-rich, putative, expressed	0.541447	0.789	-1.14	-0.3	-1.44
LOC_Os03g18220.1	pyruvate decarboxylase isozyme 2, putative, expressed	0.496697	0.772	-0.544	-0.933	-1.48
LOC_Os03g18410.1	DNA-directed RNA polymerase subunit, putative, expressed	0.803824	0.852	0.371	-1.7	-1.32
LOC_Os03g18510.1	expressed protein	0.358511	0.699	1.31	-0.811	0.501
LOC_Os03g18580.1	40S ribosomal protein S7, putative, expressed	0.371872	0.708	0.35	1.04	1.39
LOC_Os03g19250.1	AMP-binding enzyme, putative, expressed	0.856201	0.86	0.205	-1.92	-1.71
LOC_Os03g19690.1	expressed protein	0.346243	0.69	-0.584	-0.586	-1.17
LOC_Os03g19960.1	ATP-dependent RNA helicase, putative, expressed	0.948922	0.873	0.0426	-1.32	-1.28
LOC_Os03g20100.1	S1 RNA binding domain containing protein, expressed	0.527664	0.784	-0.397	-0.0362	-0.434
LOC_Os03g21550.2	eukaryotic translation initiation factor 2 subunit beta, putative, expressed	0.735885	0.84	-0.102	1.05	0.945
LOC_Os03g21790.1	cupin domain containing protein, expressed	0.0228073	0.0847	-3.18	1.26	-1.92
LOC_Os03g21940.1	60S ribosomal protein L19-3, putative, expressed	0.915437	0.869	0.0439	1.79	1.83
LOC_Os03g22180.1	60S ribosomal protein L18-3, putative, expressed	0.403986	0.728	-0.294	0.774	0.481
LOC_Os03g22340.1	60S ribosomal protein L22-2, putative, expressed	0.83481	0.857	-0.0539	0.77	0.717
LOC_Os03g22350.1	Brix domain containing protein, putative, expressed	0.0701539	0.278	2.64	-2.65	-0.0137
LOC_Os03g22570.1	MIF4G domain containing protein, putative, expressed	0.199925	0.526	-1.34	-1.19	-2.53
LOC_Os03g22740.1	nucleolar protein NOP5-1, putative, expressed	0.642965	0.819	-0.182	1.27	1.09
LOC_Os03g22880.1	nucleolar protein 5A, putative, expressed	0.359881	0.7	-0.694	1.35	0.658
LOC_Os03g24020.1	ribosomal protein L6, putative, expressed	0.0280094	0.109	1.5	-0.152	1.35
LOC_Os03g25450.1	h/ACA ribonucleoprotein complex subunit 4, putative, expressed	0.999706	0.879	0.000126	0.472	0.472
LOC_Os03g26960.1	intron-binding protein aquarius, putative, expressed	0.858578	0.861	0.212	-0.748	-0.536
LOC_Os03g27260.1	40S ribosomal protein S6, putative, expressed	0.415846	0.734	-0.288	0.84	0.551
LOC_Os03g28330.4	sucrose synthase, putative, expressed	0.674164	0.827	0.15	1.11	1.26
LOC_Os03g31134.1	retrotransposon protein, putative, Ty1-copia subclass, expressed	0.495659	0.772	-0.218	1.06	0.843
LOC_Os03g32630.1	ABC transporter, ATP-binding protein, putative, expressed	0.678883	0.828	0.219	-0.912	-0.692
LOC_Os03g34040.1	ribosomal protein, putative, expressed	0.755255	0.843	-0.129	0.533	0.404
LOC_Os03g36730.1	OST3/OST6 family protein, putative, expressed	0.33336	0.68	1.72	-1.72	0.000281
LOC_Os03g37970.1	ribosomal protein L13, putative, expressed	0.803875	0.852	-0.0953	0.368	0.273
LOC_Os03g38000.1	40S ribosomal protein S3-1, putative, expressed	0.261525	0.612	-0.32	1.71	1.39
LOC_Os03g38260.1	60S ribosomal protein L19-3, putative, expressed	0.202328	0.53	0.499	0.46	0.959
LOC_Os03g38980.1	tRNA synthetases class II domain containing protein, expressed	0.292988	0.645	0.451	-0.629	-0.178
LOC_Os03g38990.1	DNA-binding protein, putative, expressed	0.813632	0.854	0.304	-0.946	-0.641
LOC_Os03g39610.1	chlorophyll A-B binding protein, putative, expressed	0.478735	0.765	-0.232	0.748	0.516
LOC_Os03g40010.1	DEK C terminal domain containing protein, expressed	0.690109	0.83	-0.22	0.581	0.361
LOC_Os03g40180.1	60S ribosomal protein L15, putative, expressed	0.313278	0.663	-0.384	1.66	1.28
LOC_Os03g40550.1	kinase, pfkB family, putative, expressed	0.691428	0.83	0.613	0.215	0.829
LOC_Os03g46100.1	cupin domain containing protein, expressed	0.045516	0.19	-0.885	1.22	0.331
LOC_Os03g48850.1	valyl-tRNA synthetase, putative, expressed	0.993651	0.878	0.0116	-1.86	-1.85
LOC_Os03g49600.1	Os3bglu7 - beta-glucosidase, exo-beta-glucanse, expressed	0.680228	0.828	-0.521	-1.34	-1.86
LOC_Os03g50340.1	coatomer alpha subunit, putative, expressed	0.818237	0.854	0.1	-0.16	-0.0596
LOC_Os03g50520.1	dynamin family protein, putative, expressed	0.153214	0.438	0.93	-1.23	-0.298
LOC_Os03g50885.1	actin, putative, expressed	0.991665	0.878	0.00428	0.974	0.978
LOC_Os03g51250.1	adenylyl cyclase-associated protein, putative, expressed	0.128226	0.393	1.34	-2.81	-1.47
LOC_Os03g52490.1	nucleic acid binding protein, putative, expressed	0.252828	0.601	-0.606	1.43	0.821
LOC_Os03g52630.1	endoglucanase, putative, expressed	0.866127	0.862	0.117	-0.439	-0.321
LOC_Os03g52840.1	serine hydroxymethyltransferase, mitochondrial precursor, putative, expressed	0.0627379	0.256	-1.06	1.81	0.752
LOC_Os03g54040.1	ribosomal protein L6, putative, expressed	0.00942959	0.0355	1.72	-1.39	0.326
LOC_Os03g54790.1	ABC transporter, ATP-binding protein, putative, expressed	0.947149	0.873	0.0405	0.726	0.767
LOC_Os03g54890.1	ribosomal protein L13, putative, expressed	0.461741	0.757	-0.235	1.65	1.41
LOC_Os03g55150.1	eukaryotic translation initiation factor 5A, putative, expressed	0.0127417	0.0429	3.41	-4.08	-0.664
LOC_Os03g55930.1	ribosomal protein, putative, expressed	0.462429	0.758	-0.43	1.14	0.714
LOC_Os03g56280.1	lactate/malate dehydrogenase, putative, expressed	0.835923	0.857	0.0805	0.187	0.268
LOC_Os03g56670.2	photosystem I reaction center subunit III, chloroplast precursor, putative, expressed	0.365303	0.703	-0.326	0.0885	-0.238
LOC_Os03g57220.1	hydroxyacid oxidase 1, putative, expressed	0.627928	0.815	-0.954	-0.747	-1.7
LOC_Os03g57290.1	cullin, putative, expressed	0.907429	0.868	0.315	-0.373	-0.0583
LOC_Os03g58204.1	ribosomal protein L4, putative, expressed	0.941698	0.872	-0.02	0.81	0.79
LOC_Os03g58430.1	40S ribosomal protein S15, putative, expressed	0.537499	0.788	0.247	1.21	1.45
LOC_Os03g58470.1	retrotransposon protein, putative, Ty3-gypsy subclass, expressed	0.267057	0.618	-0.762	2.34	1.57
LOC_Os03g58720.1	RNA recognition motif containing protein, putative, expressed	0.632239	0.816	-0.805	-0.717	-1.52
LOC_Os03g59300.1	expressed protein	0.353113	0.695	-1.15	-0.279	-1.43
LOC_Os03g59310.1	ribosomal protein, putative, expressed	0.94014	0.872	0.0197	1.47	1.49
LOC_Os03g59640.1	magnesium-chelatase subunit chlD, chloroplast precursor, putative, expressed	0.128458	0.394	0.819	-1.49	-0.669
LOC_Os03g60090.1	methylenetetrahydrofolate reductase, putative, expressed	0.710834	0.835	-0.439	-0.285	-0.724
LOC_Os03g60100.1	50S ribosomal protein L17, putative, expressed	0.964336	0.875	-0.0246	0.976	0.951
LOC_Os03g61220.1	DEAD-box ATP-dependent RNA helicase 3, putative, expressed	0.681848	0.828	0.153	0.884	1.04
LOC_Os03g61260.1	ribosomal L18p/L5e family protein, putative, expressed	0.978672	0.877	-0.00754	0.0498	0.0422
LOC_Os03g61560.1	expressed protein	0.599251	0.807	0.204	-0.131	0.073
LOC_Os03g62750.1	inner membrane protein, putative, expressed	0.703455	0.833	-0.228	0.521	0.293
LOC_Os03g63410.1	elongation factor Tu, putative, expressed	0.903874	0.867	0.16	-0.405	-0.245
LOC_Os03g63730.1	RNA recognition motif containing protein, putative, expressed	0.560796	0.795	-0.66	-1.31	-1.97
LOC_Os03g63950.1	plastid-specific 30S ribosomal protein 1, chloroplast precursor, putative, expressed	0.782382	0.848	0.308	-2.3	-1.99
LOC_Os04g06770.2	argonaute, putative, expressed	0.337617	0.683	-0.401	-0.233	-0.634
LOC_Os04g14150.1	dehydration response related protein, putative, expressed	0.530685	0.785	0.298	-0.438	-0.14
LOC_Os04g16712.1	chloroplast 30S ribosomal protein S7, putative, expressed	0.819008	0.855	-0.13	1.81	1.68
LOC_Os04g16740.1	ATP synthase subunit alpha, putative, expressed	0.336121	0.682	-0.754	1.65	0.894
LOC_Os04g16764.1	chloroplast 30S ribosomal protein S4, putative, expressed	0.102	0.341	-0.558	1.42	0.862
LOC_Os04g16820.1	DNA-directed RNA polymerase subunit beta, putative, expressed	0.0560061	0.233	0.949	-0.802	0.148
LOC_Os04g16874.1	photosystem II 44 kDa reaction center protein, putative, expressed	0.480741	0.766	-0.281	0.551	0.27
LOC_Os04g18090.1	histone H1, putative, expressed	0.342567	0.687	0.546	0.378	0.924
LOC_Os04g18700.1	retrotransposon protein, putative, Ty3-gypsy subclass, expressed	0.73294	0.839	0.537	-1.1	-0.568
LOC_Os04g20220.1	elongation factor Tu, putative, expressed	0.931744	0.871	0.0267	-0.816	-0.789
LOC_Os04g27860.1	40S ribosomal protein S27, putative, expressed	0.932021	0.871	0.0444	-0.449	-0.405
LOC_Os04g27980.1	glycosyl hydrolase, putative, expressed	0.0799264	0.302	1.25	-1.32	-0.0639
LOC_Os04g28090.1	MYB family transcription factor, putative, expressed	0.64961	0.821	0.84	-2.23	-1.39
LOC_Os04g28180.1	ribosomal protein, putative, expressed	0.290837	0.643	0.379	1.02	1.4
LOC_Os04g29310.1	retrotransposon protein, putative, unclassified, expressed	0.328656	0.676	0.61	-2.49	-1.88
LOC_Os04g30430.1	nuclear transport factor 2, putative, expressed	0.441633	0.748	1.03	-2.61	-1.58
LOC_Os04g30780.1	eukaryotic translation initiation factor 3 subunit H, putative, expressed	0.260587	0.61	-0.767	-1.21	-1.98
LOC_Os04g32330.1	dihydrolipoyllysine-residue succinyltransferase component of 2-oxoglutarate dehydrogenase complex, mitochondrial precursor, putative, expressed	0.148808	0.431	-0.596	1.63	1.03
LOC_Os04g33220.1	SAM domain family protein, expressed	0.990839	0.878	-0.0239	-1.64	-1.66
LOC_Os04g35090.1	40S ribosomal protein S10, putative, expressed	0.624011	0.814	0.169	1.22	1.39
LOC_Os04g36890.1	peptidyl-prolyl cis-trans isomerase, FKBP-type, putative, expressed	0.104437	0.345	-3.63	1.62	-2.01
LOC_Os04g38410.1	chlorophyll A-B binding protein, putative, expressed	0.0108615	0.0385	-3.86	0.52	-3.34
LOC_Os04g38600.1	glyceraldehyde-3-phosphate dehydrogenase, putative, expressed	0.687417	0.83	-0.16	0.649	0.488
LOC_Os04g39700.1	60S ribosomal protein L6, putative, expressed	0.481059	0.766	-0.341	3.23	2.89
LOC_Os04g40320.1	expressed protein	0.00371608	0.00776	2.31	-1.72	0.586
LOC_Os04g40730.1	oxidoreductase, short chain dehydrogenase/reductase family, putative, expressed	0.772532	0.847	-0.148	0.191	0.0428
LOC_Os04g40950.1	glyceraldehyde-3-phosphate dehydrogenase, putative, expressed	0.239225	0.584	-0.371	2.1	1.72
LOC_Os04g42140.1	eukaryotic initiation factor iso-4F subunit p82-34, putative, expressed	0.618695	0.813	-0.586	-1.06	-1.65
LOC_Os04g42270.2	60S ribosomal protein L23A, putative, expressed	0.937203	0.872	-0.0832	-0.276	-0.36
LOC_Os04g42320.1	AT hook motif family protein, expressed	0.120316	0.376	-2.32	0.753	-1.57
LOC_Os04g44560.1	expressed protein	0.130636	0.398	1.48	-1.83	-0.356
LOC_Os04g45070.1	remorin, putative, expressed	0.030495	0.12	-1.16	0.491	-0.665
LOC_Os04g51630.1	60S ribosomal protein L7, putative, expressed	0.957003	0.874	0.0175	1.61	1.63
LOC_Os04g52100.1	peptidase, M24 family protein, putative, expressed	0.817443	0.854	0.161	-1.39	-1.23
LOC_Os04g52180.1	expressed protein	0.0857488	0.314	2.24	-0.653	1.59
LOC_Os04g52361.1	ribosomal protein S17, putative, expressed	0.483887	0.767	-0.226	1.46	1.24
LOC_Os04g52400.1	oxidoreductase, short chain dehydrogenase/reductase family protein, putative, expressed	0.585266	0.803	-0.818	-0.803	-1.62
LOC_Os04g52540.1	retrotransposon protein, putative, unclassified, expressed	0.867682	0.862	-0.192	-0.491	-0.683
LOC_Os04g53220.1	signal recognition particle 14 kDa protein, putative, expressed	0.0153723	0.0538	1.82	-1.86	-0.0351
LOC_Os04g53230.1	aminomethyltransferase, putative, expressed	0.790732	0.85	0.149	-0.458	-0.309
LOC_Os04g55650.1	oryzain alpha chain precursor, putative, expressed	0.179515	0.49	-1.19	0.423	-0.766
LOC_Os04g56400.1	glutamine synthetase, catalytic domain containing protein, expressed	0.582408	0.802	-0.649	-0.0117	-0.661
LOC_Os04g56720.1	RCC2, putative, expressed	0.108136	0.35	-0.909	0.793	-0.116
LOC_Os04g57440.1	oryzain beta chain precursor, putative, expressed	0.178915	0.489	-1.69	-0.0915	-1.79
LOC_Os04g57850.1	AMP-binding enzyme, putative, expressed	0.0987364	0.337	0.635	-1.21	-0.575
LOC_Os04g58110.1	pyruvate kinase, putative, expressed	0.831678	0.857	0.0843	-0.779	-0.695
LOC_Os04g58200.1	protochlorophyllide reductase A, chloroplast precursor, putative, expressed	0.442837	0.748	0.313	-0.051	0.262
LOC_Os04g58640.1	cleavage and polyadenylation specificity factor subunit 5, putative, expressed	0.349587	0.692	0.285	0.431	0.716
LOC_Os04g59494.1	transportin-2, putative, expressed	0.0648767	0.263	0.999	0.735	1.73
LOC_Os05g01270.1	peptidyl-prolyl cis-trans isomerase, putative, expressed	0.56738	0.798	-0.677	-1.07	-1.75
LOC_Os05g04380.1	peroxidase precursor, putative, expressed	0.326908	0.675	-0.434	0.726	0.292
LOC_Os05g05950.1	TOC159, putative, expressed	0.721104	0.837	-0.0989	-1.48	-1.58
LOC_Os05g06310.1	60S ribosomal protein L18-3, putative, expressed	0.287198	0.639	-0.377	1.78	1.4
LOC_Os05g06350.1	importin subunit alpha, putative, expressed	0.341283	0.686	-0.372	0.00574	-0.366
LOC_Os05g06430.1	OsPDIL2-1 protein disulfide isomerase PDIL2-1, expressed	0.725158	0.838	-0.385	-0.907	-1.29
LOC_Os05g06440.1	dnaJ homolog subfamily B member 11 precursor, putative, expressed	0.580137	0.802	0.506	-2.01	-1.5
LOC_Os05g07130.1	6PF-2-K/Fru-2,6-P2ASE liver isozyme, putative, expressed	0.211456	0.545	1.89	-3.44	-1.55
LOC_Os05g07700.1	ribosomal protein, putative, expressed	0.873687	0.863	-0.0479	1.27	1.22
LOC_Os05g08360.1	rRNA 2-O-methyltransferase fibrillarin 2, putative, expressed	0.942057	0.872	-0.023	0.771	0.748
LOC_Os05g08390.1	expressed protein	0.930671	0.871	-0.11	0.196	0.086
LOC_Os05g09400.1	30S ribosomal protein S31, chloroplast precursor, putative, expressed	0.658293	0.823	0.626	-0.254	0.372
LOC_Os05g11780.1	mitochondrial carrier protein, putative, expressed	0.10178	0.341	-0.872	0.564	-0.307
LOC_Os05g11910.1	GDSL-like lipase/acylhydrolase, putative, expressed	0.229125	0.571	1.53	-1.42	0.104
LOC_Os05g18604.1	OsSCP28 - Putative Serine Carboxypeptidase homologue, expressed	0.0124925	0.0424	-3.19	1.48	-1.71
LOC_Os05g22260.1	crooked neck, putative, expressed	0.62118	0.813	0.591	-2.16	-1.57
LOC_Os05g22614.1	PTAC16, putative, expressed	0.80324	0.852	-0.332	-0.921	-1.25
LOC_Os05g22712.1	chloroplast 30S ribosomal protein S11, putative, expressed	0.0947385	0.33	-2.37	0.786	-1.59
LOC_Os05g22940.1	acetyl-CoA carboxylase, putative, expressed	0.50955	0.777	-0.55	1.7	1.15
LOC_Os05g23720.1	mitochondrial carrier protein, putative, expressed	0.827615	0.856	0.369	-1.52	-1.15
LOC_Os05g26902.1	chaperone protein dnaJ, putative, expressed	0.934518	0.871	-0.0772	-0.673	-0.751
LOC_Os05g27940.1	40S ribosomal protein S7, putative, expressed	0.101488	0.341	0.614	0.536	1.15
LOC_Os05g28280.1	peptidase, M24 family protein, putative, expressed	0.22356	0.563	-0.68	0.837	0.157
LOC_Os05g30530.1	40S ribosomal protein S4, putative, expressed	0.0973279	0.334	0.715	-0.139	0.576
LOC_Os05g31000.1	nascent polypeptide-associated complex subunit alpha, putative, expressed	0.00955741	0.0359	-3.64	0.115	-3.52
LOC_Os05g32220.1	L1P family of ribosomal proteins domain containing protein, expressed	0.806268	0.853	-0.0995	0.068	-0.0315
LOC_Os05g33380.1	fructose-bisphospate aldolase isozyme, putative, expressed	0.423189	0.738	-0.399	0.688	0.289
LOC_Os05g33390.1	cation-transporting ATPase, putative, expressed	0.637132	0.817	0.331	-0.942	-0.611
LOC_Os05g35320.1	ATP synthase like protein, putative, expressed	0.313574	0.664	-1.22	-0.175	-1.39
LOC_Os05g35710.1	coiled-coil domain-containing protein 47 precursor, putative, expressed	0.82575	0.856	-0.0684	-0.0364	-0.105
LOC_Os05g38520.2	60S ribosomal protein L36-2, putative, expressed	0.368849	0.706	0.508	1.4	1.91
LOC_Os05g38640.1	Core histone H2A/H2B/H3/H4 domain containing protein, putative, expressed	0.137621	0.411	1.07	-0.501	0.567
LOC_Os05g39310.1	thiamine pyrophosphate enzyme, C-terminal TPP binding domain containing protein, expressed	0.965778	0.875	-0.0417	-0.485	-0.527
LOC_Os05g39960.1	40S ribosomal protein S26, putative, expressed	0.945611	0.873	0.0194	1.04	1.06
LOC_Os05g40180.1	serine/threonine-protein kinase stt7, chloroplast precursor, putative, expressed	0.878737	0.864	0.0796	-1.42	-1.34
LOC_Os05g40820.1	ribosomal protein L24, putative, expressed	0.848055	0.859	0.0882	0.00851	0.0967
LOC_Os05g41510.1	SH2 motif, putative, expressed	0.91575	0.869	0.167	-2.07	-1.9
LOC_Os05g41640.3	phosphoglycerate kinase protein, putative, expressed	0.188	0.506	-0.957	0.455	-0.502
LOC_Os05g42350.1	ferredoxin--nitrite reductase, putative, expressed	0.154954	0.441	0.622	-0.0959	0.526
LOC_Os05g44360.1	oligosaccharyl transferase, putative, expressed	0.627534	0.815	0.215	0.205	0.42
LOC_Os05g44922.1	6-phosphofructokinase, putative, expressed	0.33608	0.682	-0.889	0.227	-0.662
LOC_Os05g45660.2	plasminogen activator inhibitor 1 RNA-binding protein, putative, expressed	0.771095	0.846	0.102	-0.654	-0.552
LOC_Os05g46230.1	NAP domain containing protein, putative, expressed	0.105695	0.346	-1.19	1.01	-0.176
LOC_Os05g46560.2	RAN GTPase-activating protein 1, putative, expressed	0.505487	0.776	-0.358	-0.505	-0.862
LOC_Os05g48240.1	dynamin family protein, putative, expressed	0.943305	0.872	-0.0341	0.0919	0.0578
LOC_Os05g48320.1	60S ribosomal protein L37a, putative, expressed	0.628013	0.815	0.199	0.43	0.629
LOC_Os05g48810.1	dnaJ domain containing protein, expressed	0.842965	0.858	0.39	-1.91	-1.52
LOC_Os05g49860.1	Core histone H2A/H2B/H3/H4 domain containing protein, putative, expressed	0.706774	0.834	0.613	-1.68	-1.07
LOC_Os05g49890.1	ras-related protein, putative, expressed	0.570564	0.799	0.22	0.122	0.342
LOC_Os05g49970.2	translation initiation factor IF-2, chloroplast precursor, putative, expressed	0.906713	0.868	0.133	-0.808	-0.675
LOC_Os05g50980.1	SET domain containing protein, expressed	0.230431	0.572	-2.62	0.0672	-2.56
LOC_Os05g51180.1	hyaluronan/mRNA binding family domain containing protein, expressed	0.903454	0.867	-0.127	-2.55	-2.68
LOC_Os05g51450.1	OsClp8 - Putative Clp protease homologue, expressed	0.84093	0.858	-0.329	-1.01	-1.34
LOC_Os05g51500.1	eukaryotic translation initiation factor 5B, putative, expressed	0.194483	0.517	-0.51	1.88	1.37
LOC_Os05g51830.1	ZOS5-12 - C2H2 zinc finger protein, expressed	0.0422531	0.177	-2.12	0.686	-1.43
LOC_Os06g02500.1	superoxide dismutase, chloroplast, putative, expressed	0.448944	0.751	-0.863	-0.371	-1.23
LOC_Os06g02510.2	ribosomal protein L13, putative, expressed	0.805912	0.852	-0.0825	1.7	1.61
LOC_Os06g03860.1	uncharacterized membrane protein, putative, expressed	0.157761	0.446	1.05	-1.24	-0.185
LOC_Os06g04020.1	histone H1, putative, expressed	0.505613	0.776	0.419	1.76	2.17
LOC_Os06g05660.1	NAP domain containing protein, putative, expressed	0.124891	0.386	-1.24	1.33	0.0915
LOC_Os06g07580.2	expressed protein	0.641567	0.819	0.416	0.487	0.902
LOC_Os06g07790.1	retrotransposon protein, putative, unclassified, expressed	0.974193	0.876	-0.0119	1.36	1.35
LOC_Os06g09610.1	peroxiredoxin, putative, expressed	0.800267	0.851	0.363	-0.843	-0.48
LOC_Os06g12260.2	N-rich protein, putative, expressed	0.059204	0.245	-2.55	-0.403	-2.95
LOC_Os06g16290.1	ribosomal protein L7Ae, putative, expressed	0.738322	0.84	-0.594	-1.04	-1.64
LOC_Os06g17840.1	expressed protein	0.795563	0.851	0.322	-0.964	-0.642
LOC_Os06g20370.1	microtubule associated protein, putative, expressed	0.408767	0.73	-1.26	-1.64	-2.9
LOC_Os06g20390.1	expressed protein	0.0323789	0.129	4.07	-2.27	1.8
LOC_Os06g20790.1	SAM dependent carboxyl methyltransferase, putative, expressed	0.121859	0.38	-1.83	-0.91	-2.74
LOC_Os06g21480.1	60S ribosomal protein L31, putative, expressed	0.775705	0.847	0.515	-2.2	-1.68
LOC_Os06g23430.1	signal recognition particle 19 kDa protein, putative, expressed	0.060053	0.248	1.04	-1.22	-0.178
LOC_Os06g28950.1	expressed protein	0.0551253	0.23	-1.18	0.323	-0.86
LOC_Os06g31210.1	methionyl-tRNA synthetase, putative, expressed	0.781491	0.848	-0.127	-0.32	-0.447
LOC_Os06g35470.1	L1P family of ribosomal proteins domain containing protein, expressed	0.428254	0.741	0.681	-2.05	-1.37
LOC_Os06g36160.1	40S ribosomal protein S24, putative, expressed	0.410424	0.731	0.328	0.372	0.7
LOC_Os06g36700.1	T-complex protein, putative, expressed	0.326009	0.674	0.853	-2.12	-1.27
LOC_Os06g37440.1	elongation factor 1-gamma, putative, expressed	0.550182	0.792	-0.284	-0.742	-1.03
LOC_Os06g39708.1	photosystem II P680 chlorophyll A apoprotein, putative, expressed	0.290663	0.642	-0.605	-0.471	-1.08
LOC_Os06g39716.1	chloroplast 30S ribosomal protein S18, putative, expressed	0.0879436	0.318	-0.752	1.02	0.27
LOC_Os06g40600.1	elongation factor, putative, expressed	0.873636	0.863	0.0774	-0.0357	0.0417
LOC_Os06g40640.3	fructose-bisphospate aldolase isozyme, putative, expressed	0.18771	0.505	-1.04	0.907	-0.129
LOC_Os06g43760.1	tRNA synthetase class I, putative, expressed	0.734424	0.839	-0.165	0.238	0.0728
LOC_Os06g46284.1	glycosyl hydrolase, family 31, putative, expressed	0.017243	0.0623	-0.946	0.958	0.0115
LOC_Os06g46930.1	ribosomal protein L24, putative, expressed	0.640313	0.818	0.145	0.712	0.857
LOC_Os06g48640.1	proteasome/cyclosome repeat containing protein, expressed	0.786419	0.849	-0.561	-1.99	-2.55
LOC_Os06g48750.1	DEAD-box ATP-dependent RNA helicase, putative, expressed	0.879697	0.864	-0.0541	0.253	0.199
LOC_Os06g49120.1	Complex I intermediate-associated protein 30 domain containing protein, putative, expressed	0.049211	0.207	1.49	-1.67	-0.186
LOC_Os06g49480.1	peptidyl-prolyl cis-trans isomerase, putative, expressed	0.97774	0.876	0.0475	-1.13	-1.08
LOC_Os06g51220.4	HMG1/2, putative, expressed	0.0179996	0.0654	-1.7	0.588	-1.11
LOC_Os07g01760.1	aminotransferase, classes I and II, domain containing protein, expressed	0.219927	0.558	-2.31	0.0163	-2.29
LOC_Os07g01870.1	ribosomal protein L13, putative, expressed	0.36377	0.702	-0.308	1.13	0.819
LOC_Os07g02350.1	casein kinase II subunit alpha-2, putative, expressed	0.0745131	0.289	1.21	-1.44	-0.234
LOC_Os07g05470.1	AIR9 protein, putative, expressed	0.894693	0.866	-0.223	-1.49	-1.71
LOC_Os07g07040.1	erythrocyte binding protein 3, putative, expressed	0.0225846	0.0839	-2.65	2.93	0.276
LOC_Os07g07310.1	polynucleotide phosphorylase, putative, expressed	0.0627828	0.257	-1.03	-0.175	-1.21
LOC_Os07g07709.1	ribosomal protein S13p/S18e, putative, expressed	0.496148	0.772	-0.21	1.8	1.59
LOC_Os07g08330.1	ribosomal protein L4, putative, expressed	0.913616	0.868	-0.0399	2.74	2.7
LOC_Os07g08660.1	40S ribosomal protein S15, putative, expressed	0.384753	0.716	0.423	-0.15	0.273
LOC_Os07g08710.1	AT hook-containing DNA-binding protein, putative, expressed	0.821697	0.855	-0.163	2.3	2.14
LOC_Os07g10150.1	coatomer subunit gamma-2, putative, expressed	0.700921	0.832	0.457	-1.51	-1.05
LOC_Os07g10250.1	DEAD-box ATP-dependent RNA helicase 52B, putative, expressed	0.950863	0.873	0.0209	0.39	0.411
LOC_Os07g10660.1	ribosomal protein, putative, expressed	0.613773	0.811	-0.147	-1.01	-1.16
LOC_Os07g10830.1	dolichyl-diphosphooligosaccharide--protein glycosyltransferase 48 kDasubunit precursor, putative, expressed	0.783802	0.849	0.601	-2.31	-1.7
LOC_Os07g12250.1	ribosomal protein L24, putative, expressed	0.0151952	0.0531	3.93	-4.14	-0.205
LOC_Os07g14270.1	calreticulin precursor protein, putative, expressed	0.548827	0.791	0.404	-1.4	-0.999
LOC_Os07g15880.1	mitochondrial prohibitin complex protein 2, putative, expressed	0.379571	0.713	-0.406	0.0998	-0.306
LOC_Os07g22350.1	glucose-6-phosphate 1-dehydrogenase, chloroplast precursor, putative, expressed	0.809682	0.853	-0.117	-0.489	-0.606
LOC_Os07g23244.1	ribosomal protein L23 family protein, putative, expressed	0.407888	0.73	0.749	-1.8	-1.05
LOC_Os07g23660.1	retrotransposon protein, putative, unclassified, expressed	0.953076	0.873	0.104	-1.48	-1.38
LOC_Os07g23990.1	tetratricopeptide repeat domain containing protein, putative, expressed	0.538308	0.788	0.424	-0.553	-0.129
LOC_Os07g29320.1	rRNA-processing protein EBP2, putative, expressed	0.588211	0.804	0.532	-1.35	-0.816
LOC_Os07g31340.1	regulator of nonsense transcripts 1, putative, expressed	0.920754	0.869	-0.0856	-0.606	-0.692
LOC_Os07g32880.1	ATP synthase gamma chain, putative, expressed	0.748081	0.842	0.538	-2.65	-2.11
LOC_Os07g33860.1	60S ribosomal protein L44, putative, expressed	0.0828215	0.308	-3.22	0.879	-2.34
LOC_Os07g36080.1	oxygen evolving enhancer protein 3 domain containing protein, expressed	0.154467	0.44	-0.544	1.66	1.12
LOC_Os07g36940.2	eukaryotic translation initiation factor 4G, putative, expressed	0.657239	0.822	0.438	-1.28	-0.837
LOC_Os07g37140.1	expressed protein	0.827066	0.856	-0.122	-0.0866	-0.208
LOC_Os07g37240.1	chlorophyll A-B binding protein, putative, expressed	0.0304917	0.12	-0.749	0.557	-0.192
LOC_Os07g37550.1	chlorophyll A-B binding protein, putative, expressed	0.102162	0.342	-0.738	0.096	-0.642
LOC_Os07g38130.1	polygalacturonase inhibitor 1 precursor, putative, expressed	0.0182512	0.0664	2.43	-3.6	-1.16
LOC_Os07g38580.1	zinc finger family protein, putative, expressed	0.719389	0.836	-0.559	-2.56	-3.12
LOC_Os07g38730.1	tubulin/FtsZ domain containing protein, putative, expressed	0.683435	0.829	0.552	-0.624	-0.0725
LOC_Os07g38760.1	HEAT repeat family protein, putative, expressed	0.85126	0.86	-0.162	-0.319	-0.482
LOC_Os07g41260.1	PPR repeat domain containing protein, putative, expressed	0.970651	0.876	0.0294	-0.834	-0.805
LOC_Os07g41694.1	acidic leucine-rich nuclear phosphoprotein 32-related protein 1, putative, expressed	0.347307	0.691	-0.577	-0.195	-0.772
LOC_Os07g41740.1	PHD finger protein, putative, expressed	0.659694	0.823	0.421	-2.99	-2.56
LOC_Os07g42170.1	60S ribosomal protein, putative, expressed	0.131261	0.399	0.587	0.657	1.24
LOC_Os07g42300.1	elongation factor protein, putative, expressed	0.179048	0.489	-1.34	0.613	-0.729
LOC_Os07g42950.1	40S ribosomal protein S6, putative, expressed	0.6541	0.822	-0.14	2.04	1.9
LOC_Os07g42960.1	phospho-2-dehydro-3-deoxyheptonate aldolase, chloroplast precursor, putative, expressed	0.959196	0.874	0.111	-1.41	-1.3
LOC_Os07g43470.1	GTP-binding protein, putative, expressed	0.478445	0.765	0.775	-1.89	-1.12
LOC_Os07g44190.1	h/ACA ribonucleoprotein complex subunit 4, putative, expressed	0.944152	0.872	0.0296	1.61	1.64
LOC_Os07g44550.1	peroxidase precursor, putative, expressed	0.0987875	0.337	-1.59	1.4	-0.192
LOC_Os07g46440.1	ribosomal protein, putative, expressed	0.508425	0.777	1.09	-2.69	-1.6
LOC_Os07g46460.1	ferredoxin-dependent glutamate synthase, chloroplast precursor, putative, expressed	0.221908	0.56	-0.506	0.577	0.0714
LOC_Os07g46480.1	eukaryotic aspartyl protease domain containing protein, expressed	0.198326	0.524	-1.48	0.971	-0.512
LOC_Os07g46750.1	elongation factor protein, putative, expressed	0.412868	0.733	-0.484	0.0862	-0.398
LOC_Os07g47710.1	60S ribosomal protein L22-2, putative, expressed	0.438677	0.746	-0.234	0.248	0.0144
LOC_Os07g47780.1	60S ribosomal protein L18-3, putative, expressed	0.0194245	0.0716	2.89	-2.35	0.545
LOC_Os07g47820.1	acyl-CoA dehydrogenase family member 10, putative, expressed	0.40336	0.727	0.334	-0.041	0.293
LOC_Os07g49520.1	2-oxoglutarate dehydrogenase E1 component, mitochondrial precursor, putative, expressed	0.604039	0.809	-0.486	-0.921	-1.41
LOC_Os08g02340.2	60S acidic ribosomal protein, putative, expressed	0.499999	0.774	-0.46	0.00808	-0.452
LOC_Os08g02400.1	40S ribosomal protein S13, putative, expressed	0.487111	0.768	-0.307	1.74	1.43
LOC_Os08g02410.1	40S ribosomal protein S13, putative, expressed	0.827655	0.856	-0.0961	0.749	0.653
LOC_Os08g02700.1	fructose-bisphospate aldolase isozyme, putative, expressed	0.462422	0.758	0.92	-3.24	-2.32
LOC_Os08g03290.1	glyceraldehyde-3-phosphate dehydrogenase, putative, expressed	0.616426	0.812	-0.208	-0.254	-0.462
LOC_Os08g03520.1	retrotransposon protein, putative, Ty1-copia subclass, expressed	0.324853	0.673	-0.357	-0.4	-0.757
LOC_Os08g03640.1	60S acidic ribosomal protein P0, putative, expressed	0.0981217	0.336	-0.977	0.96	-0.0169
LOC_Os08g04280.1	actin, putative, expressed	0.996516	0.879	-0.00751	-1.59	-1.6
LOC_Os08g06530.1	rubredoxin family protein, putative, expressed	0.430803	0.742	-0.333	-0.389	-0.723
LOC_Os08g13690.1	60S ribosomal protein L7, putative, expressed	0.824844	0.856	-0.0722	2.13	2.06
LOC_Os08g15258.1	chloroplast 50S ribosomal protein L23, putative, expressed	0.824844	0.856	-0.31	-1.06	-1.37
LOC_Os08g15272.1	chloroplast 30S ribosomal protein S3, putative, expressed	0.0703921	0.279	-0.779	1.03	0.249
LOC_Os08g15276.1	chloroplast 50S ribosomal protein L14, putative, expressed	0.9006	0.867	0.204	-0.242	-0.0381
LOC_Os08g15278.1	chloroplast 30S ribosomal protein S8, putative, expressed	0.33579	0.682	-0.648	0.656	0.0078
LOC_Os08g15306.1	chloroplast 50S ribosomal protein L20, putative, expressed	0.349503	0.692	-0.94	1.41	0.47
LOC_Os08g19850.1	threonyl-tRNA synthetase, mitochondrial precursor, putative, expressed	0.194566	0.517	2.01	-2.62	-0.61
LOC_Os08g21660.1	WD domain, G-beta repeat domain containing protein, expressed	0.059814	0.247	-1.66	-1.29	-2.94
LOC_Os08g21840.1	50S ribosomal protein L15, putative, expressed	0.758866	0.844	0.163	-0.177	-0.0134
LOC_Os08g23360.1	signal recognition particle 68 kDa protein, putative, expressed	0.564425	0.797	-0.182	1.28	1.1
LOC_Os08g23930.1	ENT domain containing protein, expressed	0.0947801	0.33	1.26	-0.991	0.27
LOC_Os08g25720.1	pyrophosphate--fructose 6-phosphate 1-phosphotransferase subunit alpha, putative, expressed	0.314609	0.665	0.452	-0.358	0.0939
LOC_Os08g27850.1	endothelial differentiation-related factor 1, putative, expressed	0.650679	0.821	0.902	-2.67	-1.77
LOC_Os08g30060.1	proton pump interactor, putative, expressed	0.367537	0.705	1.17	-0.689	0.484
LOC_Os08g32850.1	methylcrotonoyl-CoA carboxylase beta chain, mitochondrial precursor, putative, expressed	0.985791	0.877	-0.0102	2.24	2.23
LOC_Os08g33190.1	linker histone H1 and H5 family protein, expressed	0.041588	0.174	-2.65	1.1	-1.55
LOC_Os08g33820.1	chlorophyll A-B binding protein, putative, expressed	0.289108	0.641	-0.644	-0.632	-1.28
LOC_Os08g35760.1	Cupin domain containing protein, expressed	0.44974	0.752	-0.924	-0.443	-1.37
LOC_Os08g40790.1	DNA repair ATPase-related, putative, expressed	0.737284	0.84	0.21	0.0583	0.269
LOC_Os08g41300.1	60S ribosomal protein L32, putative, expressed	0.0455917	0.191	3.22	-2.55	0.673
LOC_Os08g41990.1	aminotransferase, putative, expressed	0.588886	0.804	0.282	-0.274	0.00797
LOC_Os08g44290.1	RNA recognition motif containing protein, putative, expressed	0.0724592	0.284	-1.14	1.65	0.506
LOC_Os08g44450.2	L1P family of ribosomal proteins domain containing protein, expressed	0.449752	0.752	-0.469	0.647	0.178
LOC_Os08g44480.1	40S ribosomal protein S25, putative, expressed	0.54358	0.79	-0.306	0.319	0.0126
LOC_Os08g44680.1	photosystem I reaction center subunit II, chloroplast precursor, putative, expressed	0.0699144	0.278	-1.28	0.656	-0.627
LOC_Os08g44850.1	C2 domain containing protein, putative, expressed	0.238505	0.583	0.705	-1.32	-0.616
LOC_Os09g02284.1	DNA-directed RNA polymerase subunit, putative, expressed	0.22827	0.569	-1.21	0.225	-0.984
LOC_Os09g04730.1	dehydrogenase/reductase SDR family member 2, putative, expressed	0.417851	0.735	-0.333	0.428	0.0952
LOC_Os09g07830.1	acetyl-CoA acetyltransferase, cytosolic, putative, expressed	0.188049	0.506	-0.753	-1.26	-2.01
LOC_Os09g08430.1	ribosomal protein L22, putative, expressed	0.59334	0.805	-0.154	1.12	0.969
LOC_Os09g08910.1	ATP synthase, putative, expressed	0.752691	0.843	-0.114	0.161	0.0465
LOC_Os09g15770.1	CPuORF13 - conserved peptide uORF-containing transcript, expressed	0.27036	0.621	1.61	-1.44	0.167
LOC_Os09g17740.1	chlorophyll A-B binding protein, putative, expressed	0.812782	0.854	0.411	-2.21	-1.8
LOC_Os09g21210.1	beta-glucan-binding protein 4, putative, expressed	0.716566	0.836	-0.489	-1.14	-1.62
LOC_Os09g23160.1	annexin, putative, expressed	0.872136	0.863	0.0578	1.11	1.17
LOC_Os09g24260.1	WD domain, G-beta repeat domain containing protein, expressed	0.556404	0.794	-0.494	0.17	-0.324
LOC_Os09g24540.1	peptidyl-prolyl cis-trans isomerase, putative, expressed	0.169216	0.47	1.52	-2.44	-0.919
LOC_Os09g24690.1	60S ribosomal protein L34, putative, expressed	0.138915	0.414	-0.778	1.56	0.779
LOC_Os09g28570.1	zinc-binding alcohol dehydrogenase domain-containing protein 2, putative, expressed	0.476379	0.764	0.248	-1.02	-0.768
LOC_Os09g30418.1	heat shock protein, putative, expressed	0.77285	0.847	0.128	0.463	0.592
LOC_Os09g32976.1	ribosomal protein L7Ae, putative, expressed	0.15935	0.449	-0.531	2.08	1.55
LOC_Os09g35710.1	UBX domain-containing protein, putative, expressed	0.010594	0.038	4.26	-1.79	2.47
LOC_Os09g36700.1	ribonuclease T2 family domain containing protein, expressed	0.0901752	0.322	-2.18	2.79	0.606
LOC_Os09g37006.1	protein of unknown function domain containing protein, expressed	0.333641	0.68	-2	0.84	-1.16
LOC_Os09g38390.1	octicosapeptide/Phox/Bem1p, putative, expressed	0.204669	0.534	2.04	-1.51	0.521
LOC_Os09g39180.1	RNA recognition motif containing protein, putative, expressed	0.210026	0.543	-1.86	1.55	-0.31
LOC_Os10g01540.1	notchless protein, putative, expressed	0.220432	0.558	1.9	-3.41	-1.51
LOC_Os10g08550.1	enolase, putative, expressed	0.458902	0.756	-0.46	-0.0902	-0.55
LOC_Os10g08930.1	S10/S20 domain containing ribosomal protein, putative, expressed	0.749443	0.842	0.0931	0.681	0.774
LOC_Os10g10170.1	PPR repeat domain containing protein, putative, expressed	0.872803	0.863	0.183	-0.732	-0.55
LOC_Os10g12570.1	transposon protein, putative, CACTA, En/Spm sub-class, expressed	0.824731	0.856	0.224	-0.432	-0.207
LOC_Os10g17280.1	ATP synthase gamma chain, putative, expressed	0.2718	0.623	-0.691	0.0363	-0.654
LOC_Os10g21234.1	chloroplast 30S ribosomal protein S2, putative, expressed	0.436075	0.745	-0.234	0.335	0.102
LOC_Os10g21266.1	ATP synthase subunit beta, putative, expressed	0.295815	0.647	-0.823	0.78	-0.0423
LOC_Os10g21268.1	ribulose bisphosphate carboxylase large chain precursor, putative, expressed	0.163238	0.458	-1	2.71	1.71
LOC_Os10g21910.1	acetyl-CoA carboxylase, putative, expressed	0.910855	0.868	0.159	2.94	3.1
LOC_Os10g22380.1	glutamyl-tRNA synthetase, cytoplasmic, putative, expressed	0.866061	0.862	0.0653	-0.371	-0.306
LOC_Os10g25450.1	OsSub60 - Putative Subtilisin homologue, expressed	0.195535	0.519	1.11	-0.995	0.118
LOC_Os10g27190.1	40S ribosomal protein S17, putative, expressed	0.109915	0.353	0.636	0.487	1.12
LOC_Os10g31950.1	3-ketoacyl-CoA thiolase, peroxisomal precursor, putative, expressed	0.20497	0.535	-1.13	-0.383	-1.51
LOC_Os10g32540.1	SAP domain containing protein, expressed	0.32381	0.672	0.389	-0.603	-0.215
LOC_Os10g32710.2	WD domain, G-beta repeat domain containing protein, expressed	0.555728	0.794	1.09	-2.39	-1.3
LOC_Os10g32880.1	WD domain, G-beta repeat domain containing protein, expressed	0.917769	0.869	0.0731	-0.433	-0.36
LOC_Os10g32920.1	ribosomal protein, putative, expressed	0.731178	0.839	-0.104	1.05	0.949
LOC_Os10g33275.1	DEAD/DEAH box helicase domain containing protein, expressed	0.305223	0.656	-0.793	-0.572	-1.36
LOC_Os10g34750.1	LIG1 - Putative DNA ligase I, expressed	0.102033	0.341	0.815	-0.76	0.0549
LOC_Os10g35370.1	oxidoreductase, short chain dehydrogenase/reductase family domain containing family, expressed	0.342312	0.687	-1.57	-0.363	-1.93
LOC_Os10g36690.4	dehydration response related protein, putative, expressed	0.614512	0.811	0.391	-1.71	-1.32
LOC_Os10g37060.1	T-complex protein, putative, expressed	0.953283	0.874	-0.0736	-0.208	-0.282
LOC_Os10g38060.2	phospholipase D, putative, expressed	0.331885	0.679	1.64	-2.86	-1.22
LOC_Os10g38238.1	chloroplast 30S ribosomal protein S14, putative, expressed	0.958531	0.874	-0.0219	0.0271	0.00515
LOC_Os10g40130.1	Mur ligase family protein, putative, expressed	0.106831	0.348	0.807	-1.1	-0.295
LOC_Os10g40540.1	enoyl-CoA hydratase/isomerase family protein, putative, expressed	0.929202	0.871	-0.19	-2.08	-2.27
LOC_Os10g41960.1	eukaryotic translation initiation factor 3 subunit B, putative, expressed	0.283658	0.635	0.934	-1.29	-0.355
LOC_Os11g05110.1	pyruvate kinase, putative, expressed	0.391389	0.72	-0.785	0.73	-0.0555
LOC_Os11g05370.1	60S ribosomal protein L26-1, putative, expressed	0.0117788	0.0408	0.997	-0.228	0.769
LOC_Os11g06750.1	ribosomal protein L3, putative, expressed	0.756655	0.844	0.118	1.64	1.76
LOC_Os11g07020.1	fructose-bisphospate aldolase isozyme, putative, expressed	0.239131	0.584	-0.889	1.51	0.624
LOC_Os11g07470.1	expressed protein	0.915161	0.869	0.0855	-0.608	-0.523
LOC_Os11g08100.1	eukaryotic aspartyl protease domain containing protein, expressed	0.32442	0.673	1.74	-2.99	-1.25
LOC_Os11g10480.1	dehydrogenase, putative, expressed	0.884711	0.865	-0.101	-0.856	-0.957
LOC_Os11g11390.1	ribosomal protein, putative, expressed	0.234092	0.577	0.415	-0.257	0.158
LOC_Os11g13890.1	chlorophyll A-B binding protein, putative, expressed	0.65613	0.822	-0.342	-2.67	-3.01
LOC_Os11g14220.1	tubulin/FtsZ domain containing protein, putative, expressed	0.795106	0.851	-0.11	0.847	0.737
LOC_Os11g19810.1	PWWP domain containing protein, expressed	0.142646	0.42	3.04	-2.37	0.675
LOC_Os11g26850.2	erythronate-4-phosphate dehydrogenase, putative, expressed	0.0215505	0.0801	-3.74	0.851	-2.89
LOC_Os11g29400.1	6-phosphogluconate dehydrogenase, decarboxylating, putative, expressed	0.407549	0.73	-1.17	-0.267	-1.44
LOC_Os11g32470.1	NEF1, putative, expressed	0.767541	0.846	-0.401	-0.545	-0.946
LOC_Os11g34350.1	ATP-binding cassette sub-family E member 1, putative, expressed	0.103461	0.343	0.697	-0.633	0.0643
LOC_Os11g34450.1	14-3-3 protein, putative, expressed	0.0309065	0.121	-2.16	0.774	-1.39
LOC_Os11g37080.1	h/ACA ribonucleoprotein complex subunit 1-like protein 1, putative, expressed	0.524495	0.783	-0.355	0.128	-0.226
LOC_Os11g38670.1	DEAD-box ATP-dependent RNA helicase, putative, expressed	0.431778	0.743	0.876	-2.18	-1.3
LOC_Os11g47760.1	DnaK family protein, putative, expressed	0.437097	0.745	0.251	1.37	1.62
LOC_Os11g47970.1	AAA-type ATPase family protein, putative, expressed	0.525422	0.783	-0.198	0.724	0.526
LOC_Os12g01430.1	ribosomal protein L10, putative, expressed	0.904108	0.867	0.0757	-1.54	-1.46
LOC_Os12g03090.1	ribosomal protein, putative, expressed	0.531574	0.785	-0.178	1.22	1.04
LOC_Os12g05430.1	ribosomal protein L24, putative, expressed	0.308481	0.659	0.357	0.851	1.21
LOC_Os12g07010.1	ribosomal protein L3, putative, expressed	0.866269	0.862	-0.0717	0.301	0.229
LOC_Os12g12850.2	ATP-dependent Clp protease ATP-binding subunit clpA homolog,chloroplast precursor, putative, expressed	0.193115	0.515	-0.947	-0.88	-1.83
LOC_Os12g17600.1	ribulose bisphosphate carboxylase small chain, chloroplast precursor, putative, expressed	0.0741538	0.289	-0.808	1.73	0.921
LOC_Os12g20000.1	retrotransposon protein, putative, unclassified, expressed	0.10662	0.348	1.29	-1.37	-0.0806
LOC_Os12g21798.1	40S ribosomal protein S3a, putative, expressed	0.088267	0.319	-1.36	-0.322	-1.68
LOC_Os12g23180.1	3-beta hydroxysteroid dehydrogenase/isomerase family protein, putative, expressed	0.0396075	0.165	-4.19	1.92	-2.28
LOC_Os12g25710.1	bifunctional aminoacyl-tRNA synthetase, putative, expressed	0.385332	0.717	-0.56	-1.19	-1.75
LOC_Os12g33954.1	ribosomal protein S2, putative, expressed	0.892844	0.866	0.0457	0.213	0.259
LOC_Os12g34510.1	Core histone H2A/H2B/H3/H4 domain containing protein, putative, expressed	0.899096	0.867	0.0911	0.688	0.779
LOC_Os12g37720.1	zinc knuckle family protein, expressed	0.148824	0.431	0.983	-1.53	-0.547
LOC_Os12g38000.1	60S ribosomal protein L8, putative, expressed	0.676243	0.827	-0.128	1.9	1.77
LOC_Os12g40540.1	FAD dependent oxidoreductase, putative, expressed	0.317155	0.667	-1.54	-0.951	-2.49
LOC_Os12g41250.1	methylcrotonoyl-CoA carboxylase subunit alpha, mitochondrial precursor, putative, expressed	0.638557	0.818	0.451	3.2	3.66
LOC_Os12g41400.1	eukaryotic translation initiation factor 2 subunit gamma, putative, expressed	0.955935	0.874	0.0351	0.512	0.547
LOC_Os12g42876.1	5-methyltetrahydropteroyltriglutamate--homocysteine methyltransferase, putative, expressed	0.923644	0.87	-0.0501	0.292	0.241
LOC_Os12g43600.1	RNA recognition motif containing protein, expressed	0.205644	0.536	-0.406	0.82	0.414

## Sheet: +MG132
Extended Data Table 4. Proteins probed by OsPUX8B.2-TurboID-HA using proximity-labeling spectrometry (+MG132).
Protein ID	Description	(PUX8B.2+biotin)_vs_(GFP+biotin)_p.val	(PUX8B.2+biotin)_vs_(GFP－biotin)_p.val	(PUX8B.2+biotin)_vs_(PUX8B.2－biotin)_p.val	(PUX8B.2+biotin)_vs_(GFP+biotin)_p.adj	(PUX8B.2+biotin)_vs_(GFP－biotin)_p.adj	(PUX8B.2+biotin)_vs_(PUX8B.2－biotin)_p.adj	(PUX8B.2+biotin)_vs_(GFP+biotin)_ratio	(PUX8B.2+biotin)_vs_(GFP－biotin)_ratio	(PUX8B.2+biotin)_vs_(PUX8B.2－biotin)_ratio	(GFP+biotin)_centered	(GFP－biotin)_centered	(PUX8B.2+biotin)_centered	(PUX8B.2－biotin)_centered
LOC_Os01g01150.3	RNA recognition motif, putative, expressed	6.08e-06	0.000546225	7.4e-07	0.0022	0.163	5.1e-07	-1.31	-0.735	-1.68	0.379	-0.195	-0.93	0.745
LOC_Os01g01670.2	expressed protein	5.63e-05	0.000130361	0.00130777	0.0329	0.064	0.176	1.15	1.03	0.749	-0.419	-0.3	0.734	-0.0147
LOC_Os01g02020.1	acetyl-CoA acetyltransferase, cytosolic, putative, expressed	3.04e-07	9.43e-07	1.04e-06	2.55e-06	4.76e-05	1.69e-06	1.66	1.46	1.45	-0.522	-0.319	1.14	-0.302
LOC_Os01g03040.1	expressed protein	9.8e-07	1.66e-07	0.00143041	6.43e-05	3.03e-07	0.185	1.27	1.56	0.5	-0.439	-0.725	0.832	0.332
LOC_Os01g03070.2	transposon protein, putative, unclassified, expressed	4.42e-08	2.26e-08	2.61e-06	1.45e-09	4.28e-11	2.43e-05	1.5	1.62	0.941	-0.486	-0.603	1.02	0.074
LOC_Os01g03950.1	glycosyl hydrolase, family 31, putative, expressed	0.000130971	2.81e-05	6.3e-05	0.065	0.0147	0.0108	-0.67	-0.816	-0.737	0.115	0.26	-0.556	0.181
LOC_Os01g04730.1	ribosomal protein L24, putative, expressed	0.000115453	6.27e-07	0.00021407	0.0592	1.67e-05	0.0417	-0.715	-1.35	-0.659	0.0352	0.666	-0.68	-0.021
LOC_Os01g05060.1	mitochondrial glycoprotein, putative, expressed	4.97e-05	1.49e-07	0.000215453	0.0296	2.11e-07	0.042	-1.06	-2.11	-0.875	0.0488	1.1	-1.01	-0.136
LOC_Os01g05420.1	IWS1 C-terminus family protein, putative, expressed	4e-06	4.09e-07	2.04e-05	0.0011	5.19e-06	0.00196	1.75	2.29	1.44	-0.383	-0.916	1.37	-0.0708
LOC_Os01g05490.1	triosephosphate isomerase, cytosolic, putative, expressed	4.18e-05	0.00494433	0.00853019	0.0253	0.429	0.445	-0.74	-0.374	-0.339	0.377	0.0104	-0.363	-0.0244
LOC_Os01g05560.1	expressed protein	2.59e-05	1.77e-05	0.000159224	0.0152	0.0086	0.031	0.685	0.718	0.543	-0.199	-0.231	0.486	-0.0566
LOC_Os01g07070.4	transposon protein, putative, CACTA, En/Spm sub-class, expressed	0.176886	0.445774	7.12e-05	0.774	0.809	0.0125	-0.16	-0.0872	-0.745	-0.088	-0.161	-0.248	0.497
LOC_Os01g07520.1	proline-rich family protein, putative, expressed	1.98e-06	0.217891	0.0863873	0.000287	0.77	0.738	-3.41	-0.428	0.622	2.6	-0.375	-0.803	-1.42
LOC_Os01g07760.2	phospholipase D, putative, expressed	6.8e-10	5.72e-05	0.105277	3.25e-14	0.0312	0.755	-3.31	-0.896	0.23	2.32	-0.0977	-0.994	-1.22
LOC_Os01g07810.1	protein of unknown function domain containing protein, expressed	6.27e-06	2.31e-07	2.11e-05	0.0023	9.03e-07	0.00207	-1.19	-1.75	-1.03	0.199	0.757	-0.992	0.0361
LOC_Os01g07880.1	transcription factor HY5, putative, expressed	0.000158066	7.66e-05	0.000493645	0.0749	0.0407	0.0882	-1.16	-1.27	-0.99	0.302	0.417	-0.854	0.135
LOC_Os01g08400.1	syntaxin, putative, expressed	1.65e-05	2.13e-05	0.00111591	0.00881	0.0106	0.16	1.02	0.985	0.58	-0.371	-0.34	0.646	0.0654
LOC_Os01g08410.1	early fruit mRNA, putative, expressed	0.000349255	1.52e-06	0.0156038	0.127	0.000141	0.537	0.693	1.37	0.373	-0.0852	-0.758	0.608	0.236
LOC_Os01g08770.1	WD domain, G-beta repeat domain containing protein, expressed	7.4e-05	0.000108222	0.0535059	0.0412	0.055	0.691	0.729	0.694	0.238	-0.313	-0.278	0.415	0.177
LOC_Os01g08930.1	DEAD-box ATP-dependent RNA helicase, putative, expressed	9.95e-08	7.59e-08	0.000648045	4.86e-08	1.58e-08	0.109	1.49	1.53	0.506	-0.605	-0.651	0.881	0.375
LOC_Os01g08960.1	phosducin-like protein 3, putative, expressed	5.7e-10	0.505297	0.00248368	3.25e-14	0.815	0.25	-3.74	-0.0984	0.585	2.93	-0.715	-0.814	-1.4
LOC_Os01g09000.1	glutaminyl-tRNA synthetase, putative, expressed	0.00144988	6.18e-05	0.00108013	0.287	0.0335	0.156	-0.388	-0.6	-0.406	0.0396	0.251	-0.348	0.0573
LOC_Os01g09700.1	aminotransferase, classes I and II, domain containing protein, expressed	6.03e-05	0.103662	0.287548	0.0348	0.723	0.827	-5.88	-1.53	-0.954	3.79	-0.562	-2.09	-1.13
LOC_Os01g09890.1	translation initiation factor SUI1, putative, expressed	4.57e-05	6.45e-05	0.000525645	0.0275	0.0349	0.0926	1.01	0.965	0.728	-0.333	-0.29	0.675	-0.0531
LOC_Os01g10210.1	lachrymatory factor synthase, putative, expressed	8.3e-05	0.0127254	0.655092	0.0454	0.539	0.872	-1.08	-0.498	-0.0746	0.665	0.0857	-0.413	-0.338
LOC_Os01g10950.1	peptide-N4-asparagine amidase A, putative, expressed	0.00524485	2.86e-05	0.00227503	0.456	0.015	0.238	-0.369	-0.775	-0.424	-0.0229	0.383	-0.392	0.0321
LOC_Os01g12480.1	expressed protein	7.74e-06	7.07e-07	0.000620235	0.0032	2.26e-05	0.106	4.76	6.31	2.7	-1.32	-2.86	3.44	0.741
LOC_Os01g13160.1	expressed protein	5.52e-05	0.00149574	5.36e-05	0.0323	0.277	0.0088	-1.31	0.833	1.32	1.52	-0.623	0.209	-1.11
LOC_Os01g13210.2	salt stress root protein RS1, putative, expressed	1.46e-05	0.000692234	0.000902247	0.00757	0.186	0.138	-1.06	-0.639	-0.615	0.482	0.0607	-0.579	0.0365
LOC_Os01g13700.1	DNA-binding protein-related, putative, expressed	0.0017666	7.21e-05	1.09e-05	0.313	0.0385	0.000673	-0.434	-0.678	-0.857	-0.0583	0.186	-0.492	0.365
LOC_Os01g13730.1	WD domain, G-beta repeat domain containing protein, expressed	0.00352838	1.11e-05	0.00246753	0.405	0.00473	0.249	1.47	3.25	1.56	0.0972	-1.68	1.57	0.00858
LOC_Os01g13760.1	dnaJ domain containing protein, expressed	6.81e-07	2.69e-07	1.73e-06	2.5e-05	1.46e-06	7.94e-06	1.41	1.57	1.26	-0.349	-0.506	1.06	-0.204
LOC_Os01g14950.1	importin subunit alpha, putative, expressed	0.000431328	3.94e-07	0.00156964	0.146	4.68e-06	0.195	0.484	1.15	0.401	0.0241	-0.639	0.508	0.107
LOC_Os01g15020.1	lissencephaly type-1-like homology motif, putative, expressed	1.24e-08	0.426768	0.30956	1.25e-12	0.806	0.831	-2.29	-0.102	0.132	1.73	-0.464	-0.566	-0.697
LOC_Os01g15310.1	LSM domain containing protein, expressed	3.73e-08	1.93e-08	2.61e-07	6.32e-10	1.82e-11	7.56e-09	-1.8	-1.93	-1.44	0.503	0.64	-1.29	0.149
LOC_Os01g15580.1	disease resistance protein RGA2, putative, expressed	0.278884	0.99927	8.02e-05	0.8	0.85	0.0144	0.607	-0.000496	3.54	0.429	1.04	1.04	-2.5
LOC_Os01g16010.2	BCAS2 protein, putative, expressed	1.17e-05	4.04e-07	0.00295967	0.00576	5e-06	0.275	0.934	1.39	0.439	-0.244	-0.697	0.69	0.251
LOC_Os01g16080.1	expressed protein	1.72e-07	0.00615512	0.0053911	3.65e-07	0.456	0.37	-3.94	-1	-1.02	2.45	-0.492	-1.49	-0.468
LOC_Os01g16870.4	argonaute, putative, expressed	1.15e-06	8.13e-08	4.07e-05	9.4e-05	2.08e-08	0.00589	-1.12	-1.51	-0.728	0.277	0.673	-0.839	-0.111
LOC_Os01g18320.1	protoporphyrinogen oxidase, chloroplast precursor, putative, expressed	7.89e-05	3.59e-05	0.583693	0.0435	0.0194	0.866	0.639	0.706	-0.054	-0.316	-0.383	0.323	0.377
LOC_Os01g19450.1	ATP-citrate synthase subunit 1, putative, expressed	0.0228867	0.656359	7.74e-05	0.621	0.829	0.0138	-0.254	-0.0428	-0.627	0.0231	-0.188	-0.231	0.396
LOC_Os01g21180.1	translation machinery-associated protein 20, putative, expressed	1.48e-06	1.1e-06	0.000144945	0.000157	6.89e-05	0.0281	1.03	1.06	0.586	-0.359	-0.395	0.669	0.0838
LOC_Os01g21450.3	expressed protein	6.68e-05	0.000101167	0.00374796	0.0379	0.0519	0.312	1.3	1.23	0.729	-0.484	-0.416	0.814	0.0855
LOC_Os01g21940.1	WD domain, G-beta repeat domain containing protein, expressed	0.160181	2.31e-05	0.00708066	0.769	0.0117	0.415	0.164	0.84	0.369	0.18	-0.497	0.343	-0.0262
LOC_Os01g22010.4	S-adenosylmethionine synthetase, putative, expressed	0.00021538	0.0569947	0.000192894	0.0933	0.679	0.0377	0.636	0.235	0.645	-0.257	0.144	0.379	-0.266
LOC_Os01g22520.1	dihydrolipoyl dehydrogenase 1, mitochondrial precursor, putative, expressed	2.42e-05	4.07e-05	0.00993831	0.014	0.0222	0.469	0.831	0.779	0.345	-0.342	-0.29	0.489	0.144
LOC_Os01g23640.2	mov34/MPN/PAD-1 family protein, expressed	4.19e-06	0.0489893	0.00116036	0.00118	0.667	0.164	-3.56	0.838	1.71	3.31	-1.09	-0.253	-1.97
LOC_Os01g24680.1	3-hydroxyacyl-CoA dehydrogenase, putative, expressed	0.00039234	7.43e-07	0.979032	0.137	2.58e-05	0.892	0.493	1.07	-0.00245	-0.102	-0.681	0.39	0.393
LOC_Os01g24690.3	60S ribosomal protein L23A, putative, expressed	6.67e-06	2.93e-07	0.0689057	0.00254	1.91e-06	0.717	1.14	1.65	0.258	-0.382	-0.884	0.762	0.504
LOC_Os01g25330.3	SAC9, putative, expressed	0.002193	0.00783567	3.15e-05	0.342	0.484	0.00391	-0.645	0.52	1.16	0.903	-0.261	0.258	-0.9
LOC_Os01g27020.2	transposon protein, putative, unclassified, expressed	0.000902711	7.79e-05	0.00487643	0.228	0.0413	0.354	0.914	1.28	0.7	-0.191	-0.555	0.723	0.0233
LOC_Os01g31470.1	mov34/MPN/PAD-1 family protein, expressed	0.0012723	0.000384744	6.23e-07	0.271	0.135	2.75e-07	-0.814	0.968	2.14	1.39	-0.394	0.574	-1.57
LOC_Os01g32730.2	tetratricopeptide repeat containing protein, putative, expressed	1.85e-05	0.000134259	0.0237168	0.0101	0.0655	0.595	0.701	0.546	0.236	-0.331	-0.175	0.371	0.135
LOC_Os01g32870.2	heat shock protein DnaJ, putative, expressed	0.00186713	1.09e-06	0.000104006	0.321	6.73e-05	0.0191	0.437	1.14	0.657	0.123	-0.585	0.56	-0.0974
LOC_Os01g33030.1	Brix domain containing protein, putative, expressed	0.000106747	1.39e-05	0.00082212	0.0558	0.00639	0.13	1	1.29	0.755	-0.238	-0.53	0.762	0.00637
LOC_Os01g34780.2	protein binding protein, putative, expressed	3.25e-06	2.36e-07	5.94e-05	0.000764	9.68e-07	0.0101	1.8	2.44	1.26	-0.425	-1.06	1.38	0.113
LOC_Os01g35450.1	retrotransposon protein, putative, Ty3-gypsy subclass, expressed	1.39e-08	0.0854036	0.658637	2.44e-12	0.709	0.872	8.52	0.887	0.21	-6.11	1.52	2.4	2.19
LOC_Os01g36930.1	ubiquitin carboxyl-terminal hydrolase 6, putative, expressed	1.16e-05	0.157771	0.711885	0.00568	0.75	0.876	-1.39	-0.251	-0.0622	0.966	-0.175	-0.427	-0.364
LOC_Os01g38359.2	peptidyl-prolyl cis-trans isomerase, FKBP-type, putative, expressed	4.89e-07	0.000438745	0.543698	1.03e-05	0.145	0.863	-2.92	-1.26	0.149	1.92	0.252	-1.01	-1.16
LOC_Os01g39780.1	expressed protein	3.4e-06	1.24e-06	0.000132924	0.000829	9.05e-05	0.0255	2.06	2.31	1.31	-0.637	-0.895	1.42	0.113
LOC_Os01g40050.2	peptidyl-prolyl cis-trans isomerase, putative, expressed	2.15e-05	1.52e-07	0.0276042	0.0122	2.29e-07	0.615	1.13	2.02	0.374	-0.25	-1.14	0.883	0.508
LOC_Os01g40110.1	ZOS1-11 - C2H2 zinc finger protein, expressed	3.17e-06	6.18e-07	0.0111943	0.000729	1.61e-05	0.487	1.09	1.31	0.345	-0.4	-0.628	0.687	0.341
LOC_Os01g40610.1	coiled-coil domain-containing protein, putative, expressed	6.17e-06	0.864932	0.00527684	0.00225	0.843	0.367	-1.44	-0.0274	-0.57	0.933	-0.483	-0.51	0.0596
LOC_Os01g41190.2	glycine-rich protein, putative, expressed	0.000120371	2.26e-07	0.203571	0.061	8.49e-07	0.805	0.914	1.94	0.197	-0.151	-1.18	0.764	0.567
LOC_Os01g42260.3	transcriptional corepressor LEUNIG, putative, expressed	3.06e-05	0.013485	0.114867	0.0184	0.546	0.762	-2.54	1.02	0.584	2.3	-1.25	-0.233	-0.816
LOC_Os01g42820.3	RNA recognition motif containing protein, putative, expressed	1.21e-06	1.62e-05	0.000179443	0.000105	0.00774	0.0351	-1.71	-1.25	-0.924	0.736	0.283	-0.972	-0.0475
LOC_Os01g42830.1	adaptin ear-binding coat-associated protein 2, putative, expressed	2.65e-05	0.653091	0.703579	0.0156	0.828	0.876	-5.26	-0.317	0.268	3.93	-1.01	-1.33	-1.59
LOC_Os01g43540.1	suppressor of G2 allele of SKP1, putative, expressed	4.89e-05	2.51e-05	0.000111195	0.0292	0.0129	0.0207	-0.997	1.08	0.897	1.24	-0.838	0.246	-0.651
LOC_Os01g45070.1	peptide deformylase, putative, expressed	2.41e-06	3.67e-06	0.00211451	0.000427	0.000823	0.229	1.86	1.77	0.765	-0.762	-0.672	1.1	0.335
LOC_Os01g45530.1	single-stranded DNA-binding protein, putative, expressed	0.000300731	1.86e-05	0.00763588	0.116	0.00912	0.427	-2.67	-3.82	-1.61	0.644	1.8	-2.03	-0.412
LOC_Os01g46060.1	NUC189 domain containing protein, expressed	6.4e-07	3.06e-07	3.48e-06	2.12e-05	2.18e-06	5.06e-05	1.76	1.92	1.45	-0.48	-0.636	1.28	-0.165
LOC_Os01g46380.1	ketol-acid reductoisomerase, chloroplast precursor, putative, expressed	0.0114975	8.78e-05	0.000766708	0.549	0.0459	0.124	-0.285	-0.599	-0.446	-0.0477	0.267	-0.332	0.113
LOC_Os01g46710.1	transposon protein, putative, CACTA, En/Spm sub-class, expressed	0.000109931	4.25e-07	0.172503	0.057	5.76e-06	0.793	0.759	1.48	0.175	-0.155	-0.879	0.604	0.43
LOC_Os01g47430.2	protein of unknown function DUF1296 domain containing protein, expressed	4.01e-07	1.59e-07	0.423881	5.92e-06	2.64e-07	0.849	1.45	1.61	0.0957	-0.66	-0.821	0.788	0.693
LOC_Os01g48540.1	glyoxal oxidase-related, putative, expressed	2.02e-05	1.95e-05	0.00341479	0.0112	0.0096	0.297	0.78	0.783	0.383	-0.293	-0.297	0.486	0.104
LOC_Os01g48750.1	aspartic proteinase nepenthesin-2 precursor, putative, expressed	0.0416126	2.16e-05	0.0286389	0.674	0.0108	0.62	-0.496	-1.66	-0.543	-0.178	0.982	-0.673	-0.131
LOC_Os01g50310.1	VIP1 protein, putative, expressed	0.000655713	0.000558096	8.6e-06	0.19	0.165	0.000417	-0.982	-1	-1.72	0.0546	0.0775	-0.927	0.795
LOC_Os01g50320.2	surp module family protein, putative, expressed	0.00306809	1.67e-06	0.0247217	0.386	0.000171	0.601	0.939	2.53	0.632	0.087	-1.51	1.03	0.394
LOC_Os01g51170.1	glycylpeptide N-tetradecanoyltransferase 1, putative, expressed	1.13e-05	1.05e-06	1.4e-05	0.00553	6.25e-05	0.00106	-0.827	-1.1	-0.806	0.145	0.413	-0.682	0.124
LOC_Os01g51360.2	lipase, putative, expressed	2.51e-05	0.601495	0.753812	0.0146	0.824	0.879	-2.75	-0.192	0.114	2.04	-0.515	-0.706	-0.821
LOC_Os01g54540.1	ribosomal protein L13, putative, expressed	0.000133209	4.2e-06	0.000644088	0.0658	0.00104	0.109	-0.875	-1.34	-0.705	0.144	0.613	-0.731	-0.0259
LOC_Os01g54870.1	60S ribosomal protein L18a, putative, expressed	0.000782224	2.27e-05	7.25e-05	0.211	0.0115	0.0128	-0.49	-0.783	-0.677	0.00247	0.296	-0.488	0.189
LOC_Os01g55030.1	DNA-binding protein-related, putative, expressed	1.51e-07	2.35e-08	1.02e-05	2.37e-07	5.17e-11	0.000584	-1.55	-1.91	-0.95	0.447	0.809	-1.1	-0.153
LOC_Os01g55270.1	SGS domain containing protein, expressed	4.13e-07	1.18e-07	1.87e-06	6.44e-06	9.19e-08	9.99e-06	2.44	2.81	2.05	-0.614	-0.987	1.82	-0.223
LOC_Os01g55290.3	PPR repeat domain containing protein, putative, expressed	1.79e-05	0.754393	0.199188	0.00972	0.836	0.803	2.84	-0.113	0.486	-2.04	0.916	0.803	0.317
LOC_Os01g57854.1	pectinesterase, putative, expressed	5.03e-06	1.7e-05	0.00146532	0.00159	0.00815	0.188	0.756	0.653	0.359	-0.314	-0.211	0.442	0.0831
LOC_Os01g57910.1	KH domain containing protein, putative, expressed	0.000291855	5.63e-06	0.223755	0.114	0.0017	0.811	0.618	1.02	0.143	-0.173	-0.573	0.445	0.302
LOC_Os01g59500.2	U3 small nucleolar RNA-associated protein 11, putative, expressed	3.05e-07	9.26e-08	1.36e-07	2.6e-06	3.58e-08	3.41e-10	3.53	4.05	3.88	-0.67	-1.18	2.86	-1.01
LOC_Os01g60190.1	2,3-bisphosphoglycerate-independent phosphoglycerate mutase, putative, expressed	7.11e-05	0.288612	0.764892	0.0399	0.785	0.88	-0.742	-0.123	-0.0336	0.517	-0.102	-0.224	-0.191
LOC_Os01g61830.1	zinc finger C-x8-C-x5-C-x3-H type family protein, expressed	1.18e-05	3.14e-06	0.00111752	0.00579	0.000616	0.16	0.885	1.04	0.485	-0.284	-0.435	0.602	0.117
LOC_Os01g62870.1	oxidoreductase, aldo/keto reductase family protein, putative, expressed	1.37e-05	6.42e-05	0.0117125	0.00702	0.0347	0.494	-1.04	-0.859	-0.391	0.468	0.286	-0.573	-0.182
LOC_Os01g63940.1	Transcription initiation factor TFIID subunit A containing protein, expressed	5.71e-05	0.000111374	0.876197	0.0332	0.0564	0.886	0.892	0.819	0.0204	-0.459	-0.386	0.433	0.412
LOC_Os01g64280.1	sorting nexin 1, putative, expressed	2.79e-06	0.28363	0.00506269	0.000575	0.785	0.36	-1.49	0.168	0.54	1.3	-0.364	-0.196	-0.737
LOC_Os01g64680.1	bolA, putative, expressed	0.00258161	0.00228858	1.52e-05	0.364	0.331	0.00121	-0.447	-0.456	-0.901	-0.00391	0.0048	-0.451	0.45
LOC_Os01g64770.2	polypyrimidine tract-binding protein, putative, expressed	4.33e-07	0.00708413	0.935207	7.35e-06	0.472	0.89	-2.53	-0.695	-0.0168	1.72	-0.116	-0.811	-0.794
LOC_Os01g64860.1	OsSub11 - Putative Subtilisin homologue, expressed	0.001015	2.88e-05	0.00102746	0.242	0.0151	0.151	-0.45	-0.726	-0.449	0.0438	0.32	-0.406	0.043
LOC_Os01g65230.1	AGC_AGC_other_PDK1_Pk61C.1 - ACG kinases include homologs to PKA, PKG and PKC, expressed	2.78e-05	4.29e-05	0.000430765	0.0165	0.0234	0.0788	3.34	3.16	2.33	-1.13	-0.953	2.21	-0.123
LOC_Os01g65410.1	serine hydroxymethyltransferase, mitochondrial precursor, putative, expressed	7.73e-05	0.00187588	0.555251	0.0427	0.305	0.864	-0.794	-0.508	-0.0722	0.45	0.164	-0.343	-0.271
LOC_Os01g66050.1	wound-responsive family protein, putative, expressed	1.29e-05	6.4e-07	0.00704506	0.00653	1.77e-05	0.414	1.67	2.37	0.683	-0.485	-1.19	1.18	0.498
LOC_Os01g66120.3	No apical meristem protein, putative, expressed	1.49e-06	1.49e-05	0.0227118	0.00016	0.00695	0.589	2.59	1.97	0.65	-1.29	-0.666	1.3	0.651
LOC_Os01g66379.1	expressed protein	4.13e-05	0.000145577	0.0194814	0.025	0.0697	0.569	1.36	1.16	0.529	-0.601	-0.397	0.763	0.235
LOC_Os01g66560.1	signal recognition particle 72 kDa protein, putative, expressed	3.56e-08	5.39e-10	2.68e-07	4.96e-10	2.01e-14	8.41e-09	-1.32	-2.1	-1.05	0.202	0.982	-1.12	-0.0672
LOC_Os01g66600.2	rhodanese-like, putative, expressed	0.00313896	5.88e-05	0.0166953	0.389	0.032	0.547	0.593	1.04	0.437	-0.0751	-0.525	0.518	0.0816
LOC_Os01g67134.1	ribosomal L18p/L5e family protein, putative, expressed	8.32e-06	1.02e-05	0.000241828	0.00356	0.00423	0.047	0.858	0.837	0.56	-0.294	-0.273	0.564	0.00382
LOC_Os01g67980.1	cysteine proteinase EP-B 1 precursor, putative, expressed	0.00610876	0.000160113	0.000180659	0.475	0.0748	0.0353	0.621	1.07	1.06	0.067	-0.386	0.688	-0.369
LOC_Os01g68750.1	adaptin, putative, expressed	1.85e-05	0.106352	0.0688128	0.0101	0.725	0.717	-2.12	-0.47	0.541	1.6	-0.0412	-0.511	-1.05
LOC_Os01g68790.3	RNA recognition motif containing protein, putative, expressed	0.000199719	2.48e-06	0.0589759	0.0887	0.000387	0.701	-1.16	-1.99	-0.419	0.264	1.1	-0.893	-0.473
LOC_Os01g69210.1	mannosyl-oligosaccharide glucosidase, putative, expressed	1.09e-05	0.00022136	0.000178748	0.00521	0.095	0.035	0.768	0.523	0.539	-0.31	-0.066	0.457	-0.0812
LOC_Os01g69950.1	ribosomal protein L27, putative, expressed	3.08e-05	1.47e-05	0.443984	0.0185	0.00688	0.852	1.36	1.49	0.144	-0.612	-0.741	0.749	0.605
LOC_Os01g70780.1	WD40-like domain containing protein, putative, expressed	0.00114842	5.39e-05	0.00120295	0.258	0.0294	0.167	-0.498	0.757	0.495	0.687	-0.568	0.188	-0.307
LOC_Os01g71090.1	xylanase inhibitor, putative, expressed	0.000655326	6.29e-05	0.0113789	0.19	0.0341	0.49	-0.626	-0.858	-0.391	0.157	0.389	-0.469	-0.0774
LOC_Os01g71990.1	pyrroline-5-carboxylate reductase, putative, expressed	5.12e-07	1.58e-07	0.900355	1.17e-05	2.59e-07	0.888	1.32	1.51	0.0138	-0.608	-0.797	0.709	0.696
LOC_Os01g72810.1	secreted glycoprotein, putative, expressed	0.00911463	0.0992537	2.83e-05	0.523	0.72	0.00329	0.544	0.303	1.26	-0.0162	0.224	0.527	-0.736
LOC_Os01g72890.2	transposon protein, putative, CACTA, En/Spm sub-class, expressed	3.42e-05	0.0167312	4.42e-05	0.0206	0.568	0.00667	-0.944	-0.369	-0.915	0.387	-0.188	-0.557	0.358
LOC_Os01g73000.2	copine, putative, expressed	4.39e-07	0.0100466	0.00850605	7.63e-06	0.513	0.444	-2.78	-0.718	0.741	2.09	0.0274	-0.69	-1.43
LOC_Os01g73560.1	leucine rich repeat domain containing protein, putative, expressed	2.01e-08	1.06e-09	1.71e-06	2.35e-11	2.01e-14	7.7e-06	1.55	2.14	0.932	-0.39	-0.988	1.16	0.223
LOC_Os01g73620.2	expressed protein	0.000118318	1.06e-05	0.00151919	0.0603	0.00447	0.192	1.98	2.68	1.38	-0.47	-1.17	1.51	0.127
LOC_Os01g73990.1	cytochrome b5-like Heme/Steroid binding domain containing protein, expressed	0.000640829	0.000427421	6.96e-05	0.188	0.143	0.0122	0.767	0.813	1.04	-0.114	-0.159	0.654	-0.382
LOC_Os02g01110.1	translation initiation factor IF-3, putative, expressed	0.000269967	6.38e-06	0.0156668	0.108	0.00207	0.538	0.977	1.57	0.506	-0.214	-0.806	0.763	0.257
LOC_Os02g01230.2	ribosomal protein, putative, expressed	0.000235089	3.55e-06	0.0357226	0.099	0.000776	0.646	-1.37	-2.31	-0.579	0.304	1.25	-1.06	-0.486
LOC_Os02g01440.1	nitric oxide synthase 1, putative, expressed	4.71e-05	3.44e-06	0.370636	0.0282	0.000733	0.842	0.93	1.28	0.122	-0.347	-0.696	0.583	0.461
LOC_Os02g01500.1	2-oxo acid dehydrogenases acyltransferase domain containing protein, expressed	6.9e-05	1.43e-05	7.09e-06	0.0389	0.0066	0.000277	-0.565	-0.687	-0.748	0.0647	0.187	-0.5	0.248
LOC_Os02g02290.1	SNF2 family N-terminal domain containing protein, expressed	6.69e-06	9.37e-06	6.07e-05	0.00255	0.00374	0.0103	1.06	1.02	0.805	-0.338	-0.296	0.719	-0.0861
LOC_Os02g02720.2	SNARE domain containing protein, putative, expressed	0.00734918	3.44e-06	0.0142493	0.497	0.000732	0.524	0.565	1.63	0.498	0.108	-0.955	0.673	0.175
LOC_Os02g02850.1	bifunctional protein folD, putative, expressed	6.13e-06	3.61e-06	0.000257936	0.00223	0.000798	0.0499	0.857	0.912	0.534	-0.281	-0.337	0.576	0.0416
LOC_Os02g02870.1	glycine-rich protein 2, putative, expressed	0.000556886	7.66e-05	0.000320507	0.172	0.0406	0.061	-1.12	-1.47	-1.22	0.172	0.517	-0.952	0.263
LOC_Os02g03040.2	RNA recognition motif containing protein, expressed	8.67e-07	2.21e-08	1.58e-06	4.75e-05	3.84e-11	6.14e-06	-1.7	-2.58	-1.59	0.235	1.11	-1.47	0.12
LOC_Os02g03860.1	mitochondrial ATP synthase precursor, putative, expressed	2.32e-07	2.08e-07	2.35e-05	1.06e-06	6.48e-07	0.00245	1.31	1.33	0.761	-0.461	-0.477	0.85	0.0888
LOC_Os02g04100.1	peptidase, T1 family, putative, expressed	7.55e-05	2.05e-05	0.000394502	0.0419	0.0102	0.0732	-0.58	-0.683	-0.465	0.148	0.251	-0.432	0.0331
LOC_Os02g04460.1	ribosomal protein L3, putative, expressed	1.94e-09	2.34e-10	6.2e-07	3.25e-14	2.01e-14	2.71e-07	2.72	3.44	1.42	-0.827	-1.54	1.9	0.472
LOC_Os02g04480.1	cleavage and polyadenylation specificity factor, putative, expressed	1.34e-05	0.0158742	0.00904656	0.00682	0.563	0.454	-0.83	-0.292	-0.326	0.468	-0.07	-0.362	-0.0358
LOC_Os02g05440.1	expressed protein	0.000141642	2.62e-05	0.198132	0.0688	0.0136	0.803	0.53	0.657	0.118	-0.204	-0.331	0.326	0.208
LOC_Os02g05510.3	GATA transcription factor 25, putative, expressed	6.86e-05	0.0621995	7.96e-05	0.0388	0.686	0.0143	-0.926	-0.287	-0.909	0.396	-0.243	-0.531	0.378
LOC_Os02g06584.2	zinc finger C-x8-C-x5-C-x3-H type family protein, expressed	0.000637733	0.000490033	6.16e-05	0.187	0.154	0.0105	-0.571	-0.593	-0.782	0.0845	0.106	-0.486	0.295
LOC_Os02g07350.1	inositol-1-monophosphatase, putative, expressed	0.00175769	1.43e-05	0.000236856	0.313	0.00663	0.0461	-0.592	-1.13	-0.791	-0.0363	0.503	-0.629	0.162
LOC_Os02g07420.1	splicing factor, arginine/serine-rich 12, putative, expressed	2.49e-05	1.82e-07	0.638985	0.0145	4.08e-07	0.871	1.01	1.79	0.0628	-0.29	-1.08	0.716	0.653
LOC_Os02g08360.1	RNA recognition motif, putative, expressed	5.89e-05	6.63e-07	0.135922	0.0341	1.93e-05	0.775	0.788	1.35	0.185	-0.207	-0.77	0.581	0.396
LOC_Os02g09430.1	exostosin family domain containing protein, expressed	1.2e-05	3.04e-05	9.21e-05	0.00593	0.0161	0.0168	1.83	1.63	1.41	-0.609	-0.411	1.22	-0.197
LOC_Os02g10510.1	Ubiquitin family domain containing protein, expressed	7.49e-05	2.08e-06	0.110063	0.0417	0.000272	0.759	1.46	2.27	0.383	-0.436	-1.24	1.03	0.646
LOC_Os02g10690.2	targeting protein for Xklp2, putative, expressed	0.000525345	2.24e-05	0.0289275	0.166	0.0113	0.621	2.26	3.42	1.12	-0.56	-1.72	1.7	0.578
LOC_Os02g11750.3	RNA recognition motif containing protein, putative, expressed	0.000400218	4.29e-05	0.00106137	0.139	0.0234	0.154	-0.815	-1.09	-0.708	0.161	0.44	-0.654	0.054
LOC_Os02g13060.1	expressed protein	0.00034962	5.97e-05	0.00288139	0.128	0.0325	0.27	1.99	2.51	1.45	-0.499	-1.02	1.49	0.0361
LOC_Os02g13130.3	KH domain-containing protein, putative, expressed	1.34e-07	0.000465855	0.0018713	1.52e-07	0.15	0.214	-2.35	-0.866	-0.705	1.37	-0.114	-0.98	-0.275
LOC_Os02g14440.1	peroxidase precursor, putative, expressed	0.00142007	5.57e-05	0.00149614	0.285	0.0304	0.19	-0.514	-0.802	-0.51	0.0573	0.346	-0.456	0.0533
LOC_Os02g14780.2	splicing factor 3 subunit 1, putative, expressed	6.42e-05	0.791899	0.0426254	0.0367	0.838	0.667	-1.51	0.0597	-0.517	1.02	-0.553	-0.493	0.0237
LOC_Os02g15150.1	glutelin, putative, expressed	4.96e-05	0.000199212	0.000246676	0.0295	0.0882	0.0479	6.06	5.06	4.91	-2.05	-1.05	4.01	-0.906
LOC_Os02g15220.4	bromodomain containing protein, expressed	2.22e-05	5.51e-06	2.81e-05	0.0126	0.00165	0.00325	1.1	1.3	1.06	-0.231	-0.433	0.865	-0.2
LOC_Os02g15900.1	50S ribosomal protein L21, chloroplast precursor, putative, expressed	5.33e-05	8.91e-07	2.2e-05	0.0314	4.14e-05	0.0022	-0.953	-1.56	-1.06	0.0589	0.665	-0.894	0.171
LOC_Os02g16550.1	Ser/Thr protein phosphatase family protein, putative, expressed	0.014407	6.18e-06	0.143587	0.574	0.00197	0.78	-0.559	-1.71	-0.297	-0.0823	1.07	-0.641	-0.344
LOC_Os02g16830.1	glutelin, putative, expressed	0.00234048	7.87e-05	0.00117803	0.351	0.0416	0.165	1.16	1.87	1.29	-0.079	-0.791	1.08	-0.209
LOC_Os02g18660.1	expressed protein	0.00503726	0.00273957	5.69e-05	0.451	0.354	0.00952	-0.332	-0.368	-0.635	-0.00162	0.0341	-0.334	0.301
LOC_Os02g21250.2	clathrin adaptor complex small chain domain containing protein, expressed	9.34e-09	0.00159481	0.642207	1.82e-13	0.285	0.871	-3.64	-0.831	0.0904	2.54	-0.264	-1.09	-1.18
LOC_Os02g21650.1	prefoldin, putative, expressed	0.000401123	4.07e-05	0.000704928	0.139	0.0222	0.116	0.648	0.875	0.598	-0.117	-0.345	0.53	-0.0676
LOC_Os02g22070.1	expressed protein	7.15e-05	6.83e-05	1.46e-05	0.0401	0.0367	0.00113	-0.964	-0.97	-1.18	0.187	0.192	-0.778	0.399
LOC_Os02g22780.2	T-complex protein, putative, expressed	1.58e-05	1.07e-05	1.06e-05	0.00833	0.00452	0.000633	0.796	0.834	0.835	-0.18	-0.218	0.616	-0.219
LOC_Os02g25060.1	NTMC2Type1.2 protein, putative, expressed	7.4e-08	1.58e-08	2.76e-06	1.44e-08	5.65e-12	2.82e-05	1.95	2.31	1.28	-0.56	-0.928	1.39	0.102
LOC_Os02g25580.1	Sec1 family transport protein, putative, expressed	0.000198948	0.000227042	0.000219169	0.0884	0.0967	0.0427	0.632	0.62	0.623	-0.163	-0.152	0.469	-0.155
LOC_Os02g26850.1	rRNA-processing protein FCF, putative, expressed	0.000305368	6.88e-07	0.0610602	0.117	2.11e-05	0.705	-0.495	-1.05	-0.188	0.0617	0.616	-0.433	-0.245
LOC_Os02g28810.1	ribosomal protein, putative, expressed	3.92e-06	0.000203929	6.18e-05	0.00106	0.0897	0.0106	1.02	0.621	0.726	-0.427	-0.0299	0.592	-0.135
LOC_Os02g30730.2	SART-1 family protein, putative, expressed	0.000203689	2.21e-07	0.0765497	0.0899	7.85e-07	0.727	1	2.3	0.338	-0.0949	-1.39	0.91	0.572
LOC_Os02g32350.1	TUDOR protein with multiple SNc domains, putative, expressed	3.61e-10	3.82e-07	4.28e-07	3.25e-14	4.27e-06	6.66e-08	-2.53	-1.16	-1.15	1.32	-0.0476	-1.21	-0.0626
LOC_Os02g33230.1	nucleoside-diphosphate-sugar epimerase, putative, expressed	0.493164	2.42e-05	0.974242	0.829	0.0123	0.892	-0.13	-1.42	-0.00606	-0.26	1.03	-0.39	-0.384
LOC_Os02g35160.1	ligatin, putative, expressed	1.7e-06	1.33e-06	4.67e-05	0.00021	0.000105	0.00725	1.52	1.57	1.02	-0.495	-0.54	1.03	0.00731
LOC_Os02g35600.1	PHD finger protein, putative, expressed	1.4e-06	1.26e-05	6.56e-06	0.000141	0.00564	0.000235	1.3	0.997	1.08	-0.452	-0.154	0.843	-0.236
LOC_Os02g36710.1	SET, putative, expressed	0.00353929	2e-05	0.168593	0.405	0.00991	0.791	-1.19	-2.44	0.457	0.396	1.65	-0.794	-1.25
LOC_Os02g37862.1	60S ribosomal protein L6, putative, expressed	7.52e-08	5.56e-09	2.32e-06	1.53e-08	2.01e-14	1.8e-05	-1.73	-2.31	-1.17	0.426	1.01	-1.3	-0.136
LOC_Os02g37870.1	Brix domain containing protein, putative, expressed	7.04e-05	0.000383869	0.000527727	0.0396	0.134	0.0929	0.703	0.561	0.536	-0.253	-0.111	0.45	-0.0863
LOC_Os02g38190.1	expressed protein	2.22e-07	1.62e-09	0.000275348	9.12e-07	2.01e-14	0.0531	2.16	3.74	0.906	-0.456	-2.04	1.7	0.794
LOC_Os02g38980.6	bromodomain domain containing protein, expressed	0.00115704	2.09e-05	0.0170762	0.259	0.0104	0.55	0.636	1.09	0.399	-0.105	-0.558	0.531	0.132
LOC_Os02g39050.1	pre-mRNA-splicing factor ISY1, putative, expressed	0.000114841	6.72e-07	0.0383437	0.059	2e-05	0.655	0.653	1.22	0.247	-0.124	-0.688	0.529	0.283
LOC_Os02g39180.1	expressed protein	0.00137895	4.24e-06	0.0031476	0.281	0.00106	0.284	0.531	1.13	0.466	0.0011	-0.6	0.532	0.066
LOC_Os02g39350.1	eukaryotic translation initiation factor 2A, putative, expressed	3.79e-09	1.01e-05	0.00142108	3.25e-14	0.00414	0.185	-2.1	-0.852	-0.442	1.25	0.00389	-0.848	-0.407
LOC_Os02g39600.1	outer envelope protein, putative, expressed	0.00019234	4.96e-05	0.250314	0.0864	0.0271	0.818	0.707	0.843	0.145	-0.283	-0.419	0.424	0.278
LOC_Os02g39700.1	RNA binding protein, putative, expressed	0.000271957	5.25e-05	0.021255	0.109	0.0287	0.581	-1.81	-2.24	-0.878	0.575	1.01	-1.23	-0.353
LOC_Os02g39720.6	splicing factor, arginine/serine-rich 7, putative, expressed	1.07e-06	1.83e-07	1.14e-06	7.95e-05	4.2e-07	2.23e-06	-1.78	-2.18	-1.76	0.347	0.746	-1.43	0.335
LOC_Os02g39730.1	expressed protein	0.00777682	0.00378331	2.71e-05	0.504	0.395	0.00308	-0.626	-0.71	-1.42	-0.0629	0.0214	-0.689	0.73
LOC_Os02g39820.1	PPR repeat domain containing protein, putative, expressed	1.11e-06	5.71e-09	3.77e-06	8.69e-05	2.01e-14	6.06e-05	-1.22	-2.22	-1.06	0.0971	1.09	-1.12	-0.0653
LOC_Os02g39890.2	RNA recognition motif containing protein, putative, expressed	1.44e-06	0.000225384	0.0146991	0.00015	0.0962	0.528	-1.49	-0.796	-0.408	0.814	0.124	-0.673	-0.265
LOC_Os02g39920.1	AT hook motif family protein, expressed	8.23e-07	4.25e-08	0.000938814	4.16e-05	1.13e-09	0.142	1.13	1.58	0.463	-0.335	-0.788	0.793	0.33
LOC_Os02g40460.1	S1 RNA binding domain containing protein, expressed	3.12e-05	0.00184646	0.00142876	0.0187	0.303	0.185	0.817	0.467	0.486	-0.374	-0.0246	0.442	-0.0435
LOC_Os02g40490.1	expressed protein	0.000122221	1.31e-05	9.69e-05	0.0617	0.00591	0.0178	-1.23	-1.63	-1.27	0.198	0.596	-1.03	0.236
LOC_Os02g42040.1	MIF4G domain containing protein, putative, expressed	1.01e-05	8.82e-06	7.43e-05	0.00472	0.00343	0.0132	1.77	1.8	1.38	-0.531	-0.56	1.24	-0.143
LOC_Os02g42230.1	RPA2B - Putative single-stranded DNA binding complex subunit 2, expressed	5.28e-05	0.0106494	0.269563	0.0312	0.52	0.823	-4.2	-1.9	-0.698	2.5	0.199	-1.7	-1
LOC_Os02g43020.1	heat shock protein STI, putative, expressed	3.42e-07	2.24e-08	7.27e-06	3.64e-06	4.04e-11	0.000292	1.12	1.53	0.786	-0.264	-0.669	0.859	0.0734
LOC_Os02g44220.1	peroxisomal biogenesis factor 19, putative, expressed	0.0117395	1.53e-07	0.00119593	0.552	2.34e-07	0.167	0.7	3.16	1.03	0.522	-1.93	1.22	0.191
LOC_Os02g45070.2	PINHEAD, putative, expressed	1.11e-05	5.37e-07	6.46e-05	0.00538	1.11e-05	0.0112	-0.813	-1.16	-0.653	0.156	0.504	-0.657	-0.00351
LOC_Os02g47020.1	phosphoribulokinase/Uridine kinase family protein, expressed	1.89e-06	9.35e-08	1.27e-05	0.000262	3.72e-08	0.000882	-1.15	-1.63	-0.918	0.227	0.702	-0.924	-0.00556
LOC_Os02g47440.1	syntaxin, putative, expressed	7.43e-05	3.9e-07	0.000651773	0.0414	4.53e-06	0.11	0.974	1.83	0.726	-0.0919	-0.946	0.882	0.156
LOC_Os02g47590.1	ornithine carbamoyltransferase, putative, expressed	0.00157814	2.46e-05	0.000369828	0.299	0.0126	0.0692	-0.425	-0.747	-0.525	0.000714	0.323	-0.424	0.101
LOC_Os02g48000.1	TBC domain containing protein, expressed	6.84e-06	0.149688	0.0921427	0.00265	0.747	0.743	-3.39	-0.587	0.702	2.57	-0.233	-0.82	-1.52
LOC_Os02g48010.1	nuclear matrix constituent protein 1-like, putative, expressed	5.78e-05	0.000445685	0.689604	0.0336	0.146	0.875	-0.708	0.54	0.0418	0.676	-0.571	-0.0317	-0.0734
LOC_Os02g49090.1	WD domain, G-beta repeat domain containing protein, expressed	4.02e-07	1.59e-05	0.000478907	5.96e-06	0.00754	0.086	-1.09	-0.704	-0.452	0.525	0.144	-0.56	-0.108
LOC_Os02g49270.1	NOL1/NOP2/sun family protein, putative, expressed	0.00154739	7.24e-05	0.381909	0.296	0.0387	0.843	0.566	0.866	0.117	-0.179	-0.479	0.387	0.27
LOC_Os02g49320.1	sucrase-related, putative, expressed	0.0181647	7.3e-05	0.000372996	0.598	0.039	0.0697	0.468	1.11	0.891	0.149	-0.491	0.617	-0.274
LOC_Os02g49450.1	BSD domain-containing protein, putative, expressed	3.78e-06	0.442156	0.141984	0.000996	0.808	0.779	-5.12	-0.422	-0.844	3.53	-1.18	-1.6	-0.754
LOC_Os02g49570.1	OsProtIV1 - Putative Protease IV homologue; Domain 2 is a SPH, expressed	0.000117232	4.61e-07	0.239235	0.0599	7.26e-06	0.815	-0.867	-1.69	-0.171	0.184	1.01	-0.683	-0.512
LOC_Os02g49610.1	ribosomal protein L7Ae, putative, expressed	0.000221697	1.92e-05	0.0379995	0.0952	0.00943	0.654	0.968	1.32	0.4	-0.295	-0.651	0.673	0.273
LOC_Os02g49620.1	expressed protein	5.58e-08	8.07e-09	1.31e-05	4.28e-09	5.77e-14	0.000945	2.04	2.53	1.08	-0.626	-1.12	1.41	0.331
LOC_Os02g49780.1	expressed protein	1.08e-06	4.72e-07	0.00197605	8.08e-05	7.73e-06	0.22	1.92	2.12	0.728	-0.732	-0.925	1.19	0.465
LOC_Os02g50230.1	peptidase, putative, expressed	0.000461861	1.07e-06	0.0109181	0.153	6.49e-05	0.483	-0.491	-1.05	-0.295	0.0327	0.59	-0.459	-0.164
LOC_Os02g50550.1	dynamin, putative, expressed	0.00033201	4.23e-05	0.0387996	0.124	0.0231	0.656	0.55	0.721	0.239	-0.173	-0.343	0.377	0.139
LOC_Os02g50560.1	DSHCT domain containing protein, expressed	9.02e-06	4.66e-07	0.00890281	0.00402	7.48e-06	0.451	1.18	1.67	0.442	-0.356	-0.844	0.821	0.379
LOC_Os02g50690.1	GDSL-like lipase/acylhydrolase, putative, expressed	0.012876	0.00141588	9.65e-05	0.562	0.27	0.0177	0.368	0.538	0.782	0.0541	-0.116	0.422	-0.36
LOC_Os02g51080.1	FAD binding domain containing protein, expressed	3.69e-05	3.45e-05	0.0103295	0.0223	0.0186	0.475	0.912	0.92	0.396	-0.355	-0.363	0.557	0.161
LOC_Os02g51140.1	N-rich protein, putative, expressed	6.47e-05	1.82e-05	0.000735754	0.0369	0.00886	0.12	1.46	1.71	1.05	-0.404	-0.655	1.05	0.0047
LOC_Os02g51700.1	expressed protein	0.000193463	1.55e-05	0.527253	0.0867	0.00734	0.861	0.86	1.19	0.0947	-0.325	-0.651	0.535	0.44
LOC_Os02g51790.1	ribosomal protein L29, putative, expressed	0.000531471	6.13e-06	0.0661502	0.167	0.00195	0.713	0.949	1.68	-0.381	-0.386	-1.12	0.563	0.943
LOC_Os02g52010.1	phosphate-induced protein 1 conserved region domain containing protein, expressed	0.00560427	0.000401768	5.35e-05	0.464	0.138	0.00878	0.535	0.805	1.05	0.0624	-0.207	0.598	-0.453
LOC_Os02g52250.1	SKIP/SNW domain containing protein, expressed	0.00516899	2.3e-07	0.917533	0.454	8.94e-07	0.889	0.36	1.33	0.0105	0.0656	-0.906	0.425	0.415
LOC_Os02g52820.1	cold-induced protein, putative, expressed	7.89e-08	2.38e-07	5.77e-07	1.86e-08	9.89e-07	2.14e-07	1.61	1.42	1.28	-0.531	-0.342	1.08	-0.205
LOC_Os02g53150.1	expressed protein	0.00048052	0.00497529	1.38e-05	0.157	0.429	0.00103	-0.737	-0.514	-1.17	0.133	-0.0913	-0.605	0.564
LOC_Os02g54110.1	expressed protein	1.16e-05	1.45e-06	0.00816656	0.00566	0.000127	0.438	1.82	2.33	0.718	-0.605	-1.11	1.22	0.501
LOC_Os02g54770.2	RNA recognition motif containing protein, expressed	3.29e-06	1.32e-06	1.12e-06	0.000781	0.000105	2.15e-06	-1.58	-1.76	-1.8	0.298	0.477	-1.29	0.511
LOC_Os02g55000.1	zinc finger CCCH-type with G patch domain-containing protein, putative, expressed	4.59e-06	1.83e-06	1.26e-05	0.00137	0.000209	0.000878	4.17	4.65	3.69	-1.04	-1.52	3.13	-0.566
LOC_Os02g55120.1	translation initiation factor IF-3, putative, expressed	8.69e-08	4.9e-09	5.85e-07	2.81e-08	2.01e-14	2.24e-07	-1.3	-1.8	-1.05	0.266	0.76	-1.04	0.0115
LOC_Os02g55140.1	leucine aminopeptidase, chloroplast precursor, putative, expressed	1.95e-06	0.000225969	0.651405	0.000277	0.0964	0.872	-1.09	-0.604	-0.0482	0.654	0.169	-0.435	-0.387
LOC_Os02g56560.2	CK1_CaseinKinase_1.6 - CK1 includes the casein kinase 1 kinases, expressed	4.12e-06	4.32e-07	0.000930126	0.00115	6e-06	0.141	1.2	1.57	0.597	-0.362	-0.724	0.842	0.244
LOC_Os02g56850.3	glutathione reductase, putative, expressed	2.15e-06	0.0905484	0.509755	0.000341	0.714	0.859	-4.46	-0.809	0.293	3.21	-0.435	-1.24	-1.54
LOC_Os02g57220.1	WD domain, G-beta repeat domain containing protein, expressed	0.000521371	2e-05	5.5e-05	0.165	0.00993	0.0091	0.756	1.16	1.02	-0.0223	-0.424	0.733	-0.287
LOC_Os02g57640.1	KH domain containing protein, putative, expressed	1.49e-06	3.55e-07	1.71e-05	0.000159	3.44e-06	0.00146	-1.02	-1.2	-0.762	0.273	0.457	-0.746	0.0161
LOC_Os02g57670.1	ribosomal L9, putative, expressed	0.00613982	8.84e-05	0.369547	0.475	0.0461	0.842	0.744	1.39	-0.199	-0.26	-0.908	0.485	0.683
LOC_Os02g58110.1	expressed protein	0.0135276	4.44e-05	0.972718	0.567	0.0243	0.892	1.36	3.21	-0.0156	-0.217	-2.08	1.14	1.15
LOC_Os02g58480.1	sucrose synthase, putative, expressed	5.38e-06	1.01e-05	0.000579267	0.00179	0.00416	0.0999	1.34	1.24	0.734	-0.51	-0.412	0.828	0.0941
LOC_Os03g01900.1	40S ribosomal protein S17, putative, expressed	3.41e-06	2.37e-06	0.00218935	0.000836	0.000353	0.233	3.37	3.51	1.43	-1.29	-1.44	2.08	0.645
LOC_Os03g02040.1	remorin, putative, expressed	1.49e-06	1.52e-05	2.37e-05	0.000161	0.00715	0.00248	1.55	1.17	1.11	-0.588	-0.215	0.957	-0.153
LOC_Os03g02590.4	peroxisomal biogenesis factor 11, putative, expressed	1.96e-05	4.73e-06	0.871767	0.0108	0.00128	0.886	0.776	0.921	0.0161	-0.348	-0.493	0.428	0.412
LOC_Os03g02960.1	nascent polypeptide-associated complex subunit alpha, putative, expressed	9.21e-05	0.0648616	0.399902	0.0496	0.689	0.846	-0.659	0.21	0.0883	0.569	-0.3	-0.0901	-0.178
LOC_Os03g03910.1	catalase domain containing protein, expressed	1.55e-05	3.75e-05	9.23e-05	0.00817	0.0204	0.0169	-0.694	-0.623	-0.555	0.226	0.155	-0.468	0.087
LOC_Os03g04300.1	ankyrin repeat domain containing protein, expressed	0.00260178	3.6e-05	0.0838471	0.365	0.0195	0.735	-1.4	-2.55	-0.666	0.25	1.39	-1.15	-0.489
LOC_Os03g04340.1	C-methyltransferase, putative, expressed	0.000816813	0.0111492	0.000170237	0.216	0.525	0.0333	0.694	0.45	0.863	-0.192	0.0518	0.502	-0.361
LOC_Os03g04520.2	RNA recognition motif containing protein, putative, expressed	0.000914483	6.13e-05	0.000267021	0.229	0.0333	0.0515	1.16	1.68	1.38	-0.106	-0.623	1.06	-0.328
LOC_Os03g05290.1	aquaporin protein, putative, expressed	7.01e-05	0.00240077	8.99e-05	0.0395	0.337	0.0164	1.32	0.802	1.28	-0.47	0.048	0.85	-0.428
LOC_Os03g05750.1	heavy-metal-associated domain-containing protein, putative, expressed	8.6e-05	6.38e-05	0.00512781	0.0468	0.0345	0.362	3.08	3.2	1.69	-1.09	-1.21	1.99	0.3
LOC_Os03g05780.1	4-coumarate--CoA ligase-like 7, putative, expressed	1.59e-06	1.71e-06	8.7e-05	0.000181	0.000181	0.0158	1.06	1.05	0.649	-0.369	-0.359	0.689	0.0395
LOC_Os03g05830.1	transposon protein, putative, CACTA, En/Spm sub-class, expressed	1.76e-05	0.000132838	2.06e-06	0.00954	0.065	1.32e-05	-1.05	-0.809	-1.35	0.244	0.00791	-0.801	0.549
LOC_Os03g06220.1	DEAD-box ATP-dependent RNA helicase, putative, expressed	1.48e-05	0.235618	0.553574	0.00772	0.774	0.863	-0.856	-0.131	-0.0636	0.593	-0.131	-0.263	-0.199
LOC_Os03g06240.2	YT521-B-like family domain containing protein, expressed	2.29e-05	0.0121273	0.717325	0.0131	0.534	0.877	-0.9	-0.357	0.0428	0.596	0.0535	-0.304	-0.346
LOC_Os03g06740.1	glutathione reductase, putative, expressed	1.43e-05	4.26e-06	3.81e-06	0.00739	0.00107	6.2e-05	-1.34	-1.55	-1.57	0.224	0.433	-1.11	0.454
LOC_Os03g06980.1	nucleic acid binding protein, putative, expressed	0.000130264	2.3e-06	2.75e-05	0.0647	0.000334	0.00315	-0.533	-0.876	-0.65	0.0183	0.361	-0.515	0.135
LOC_Os03g08050.1	elongation factor Tu, putative, expressed	9.53e-08	1.63e-07	4.37e-06	4.09e-08	2.85e-07	8.84e-05	1.47	1.39	0.947	-0.521	-0.435	0.952	0.00447
LOC_Os03g08450.1	eukaryotic translation initiation factor 3 subunit K, putative, expressed	6.27e-05	0.0858779	0.000666418	0.0359	0.71	0.112	0.826	0.23	0.601	-0.412	0.184	0.414	-0.187
LOC_Os03g08480.2	rho termination factor, N-terminal domain containing protein, expressed	7.5e-06	1.22e-07	0.293146	0.00305	1.03e-07	0.828	2.75	4.43	0.341	-0.868	-2.55	1.88	1.54
LOC_Os03g10110.1	cupin domain containing protein, expressed	2.07e-06	2.99e-05	0.0824651	0.000314	0.0158	0.734	1.5	1.09	0.279	-0.782	-0.371	0.716	0.437
LOC_Os03g10510.1	outer mitochondrial membrane porin, putative, expressed	1.66e-05	0.000266995	0.000335315	0.00886	0.108	0.0634	1.02	0.714	0.692	-0.413	-0.107	0.606	-0.0854
LOC_Os03g11220.1	keratin, type I cytoskeletal 9, putative, expressed	9.18e-06	0.464236	0.0028595	0.00412	0.811	0.269	-4.51	-0.393	2.07	3.81	-0.316	-0.709	-2.78
LOC_Os03g11580.1	expressed protein	0.001817	4.41e-06	0.0322561	0.317	0.00114	0.634	0.607	1.34	0.353	-0.0312	-0.767	0.576	0.222
LOC_Os03g12000.1	DEAD-box ATP-dependent RNA helicase, putative, expressed	9.01e-05	4.01e-05	0.00418358	0.0487	0.0218	0.329	1.26	1.4	0.723	-0.416	-0.553	0.846	0.123
LOC_Os03g12020.1	50S ribosomal protein L15, chloroplast precursor, putative, expressed	0.000100618	1.16e-05	0.503214	0.0532	0.00499	0.859	0.857	1.12	0.0917	-0.339	-0.605	0.518	0.426
LOC_Os03g13590.1	potyvirus VPg interacting protein, putative, expressed	1.4e-06	0.917915	0.295598	0.000142	0.846	0.829	-4.43	-0.0428	0.448	3.42	-0.963	-1.01	-1.45
LOC_Os03g14510.2	immature colon carcinoma transcript 1 protein precursor, putative, expressed	7.73e-05	1.05e-06	0.0506062	0.0427	6.21e-05	0.686	1.51	2.55	0.505	-0.372	-1.41	1.14	0.636
LOC_Os03g14530.1	S10/S20 domain containing ribosomal protein, putative, expressed	1.76e-06	4e-06	0.000190448	0.000226	0.000959	0.0372	1.16	1.05	0.649	-0.443	-0.337	0.714	0.0654
LOC_Os03g14580.1	expressed protein	5.16e-08	1.2e-09	4.24e-05	3.02e-09	2.01e-14	0.00628	2.66	4.04	1.21	-0.683	-2.06	1.98	0.768
LOC_Os03g15480.1	heat shock protein DnaJ, putative, expressed	5.82e-08	1.67e-08	5.03e-05	5.19e-09	7.86e-12	0.00806	2.44	2.81	1.1	-0.854	-1.22	1.59	0.486
LOC_Os03g15560.1	wibg, putative, expressed	7.31e-06	1.18e-05	0.00375964	0.00294	0.00514	0.312	-1.16	-1.1	-0.495	0.473	0.408	-0.688	-0.192
LOC_Os03g15870.1	ribosomal protein L4, putative, expressed	5.43e-05	6.94e-06	0.344836	0.0319	0.00237	0.838	1.1	1.42	0.156	-0.432	-0.75	0.669	0.513
LOC_Os03g16960.1	cysteine-rich repeat secretory protein 55 precursor, putative, expressed	9.22e-05	0.000340218	0.052717	0.0496	0.125	0.69	1.19	1	0.403	-0.544	-0.353	0.65	0.247
LOC_Os03g16980.2	NAD dependent epimerase/dehydratase family domain containing protein, expressed	0.00112571	9.37e-05	2.18e-05	0.255	0.0486	0.00218	-0.424	-0.598	-0.719	-0.0112	0.163	-0.435	0.284
LOC_Os03g17010.1	RNA recognition motif containing protein, putative, expressed	0.000598416	2.3e-06	0.780656	0.18	0.000332	0.881	0.498	1.01	0.028	-0.114	-0.625	0.384	0.356
LOC_Os03g17170.1	zinc finger, C3HC4 type domain containing protein, expressed	2.88e-05	1.28e-07	6.43e-05	0.0171	1.24e-07	0.0111	0.966	1.83	0.873	-0.05	-0.91	0.916	0.0431
LOC_Os03g18200.2	heat shock protein DnaJ, putative, expressed	0.000210168	5.97e-05	0.00244562	0.0918	0.0325	0.248	1.24	1.46	0.868	-0.348	-0.569	0.893	0.0247
LOC_Os03g18570.1	40S ribosomal protein S7, putative, expressed	8.18e-05	0.000278653	0.054392	0.0448	0.111	0.693	0.605	0.515	0.2	-0.275	-0.185	0.33	0.13
LOC_Os03g18690.1	26S protease regulatory subunit 4, putative, expressed	0.0127308	2.64e-05	2.97e-05	0.56	0.0136	0.00354	-0.345	-0.863	-0.85	-0.169	0.348	-0.514	0.336
LOC_Os03g18840.1	NUC189 domain containing protein, expressed	2.28e-07	3.22e-07	9.22e-07	9.95e-07	2.57e-06	1.13e-06	1.86	1.78	1.58	-0.55	-0.479	1.3	-0.276
LOC_Os03g19240.1	AMP-binding enzyme, putative, expressed	2.3e-05	0.000167831	0.000323795	0.0131	0.0776	0.0615	0.823	0.639	0.584	-0.312	-0.127	0.512	-0.0727
LOC_Os03g19250.1	AMP-binding enzyme, putative, expressed	2.16e-09	1.58e-09	2.57e-08	3.25e-14	2.01e-14	1.82e-13	2.3	2.38	1.75	-0.692	-0.774	1.61	-0.14
LOC_Os03g19270.4	universal stress protein domain containing protein, putative, expressed	0.00350518	0.0485775	0.00021671	0.404	0.666	0.0423	0.516	0.301	0.779	-0.117	0.0979	0.399	-0.38
LOC_Os03g19530.1	DEAD-box ATP-dependent RNA helicase, putative, expressed	7e-08	5.46e-09	4.78e-07	1.14e-08	2.01e-14	1.05e-07	-1.58	-2.11	-1.27	0.343	0.866	-1.24	0.0325
LOC_Os03g19680.1	enoyl-CoA hydratase/isomerase family protein, putative, expressed	0.0015219	2.77e-05	0.000259492	0.294	0.0145	0.0502	-0.356	-0.614	-0.459	-0.00109	0.256	-0.357	0.102
LOC_Os03g19960.1	ATP-dependent RNA helicase, putative, expressed	7.83e-05	0.000392377	0.0062948	0.0432	0.136	0.396	-0.952	-0.767	-0.498	0.397	0.213	-0.554	-0.0559
LOC_Os03g20100.1	S1 RNA binding domain containing protein, expressed	4.67e-05	7.49e-06	1.27e-05	0.028	0.00267	0.00089	-0.753	-0.943	-0.885	0.108	0.298	-0.645	0.24
LOC_Os03g21270.1	expressed protein	5.95e-07	6.87e-08	0.000340018	1.75e-05	1.03e-08	0.0641	3.14	4.02	1.44	-0.994	-1.87	2.15	0.713
LOC_Os03g21790.1	cupin domain containing protein, expressed	3.08e-10	2.42e-10	2.22e-07	3.25e-14	2.01e-14	3.54e-09	2.94	3.02	1.41	-1.1	-1.17	1.84	0.43
LOC_Os03g21900.1	uroporphyrinogen decarboxylase, putative, expressed	1.13e-05	2.38e-07	2.57e-06	0.0055	9.89e-07	2.33e-05	-0.999	-1.57	-1.19	0.059	0.629	-0.94	0.252
LOC_Os03g21990.1	WD domain, G-beta repeat domain containing protein, expressed	2.92e-05	8.7e-07	0.0126653	0.0174	3.89e-05	0.506	0.832	1.27	0.338	-0.223	-0.657	0.609	0.271
LOC_Os03g22320.1	utp14 protein, putative, expressed	3.59e-06	2.52e-07	0.00274348	0.000914	1.18e-06	0.263	1.77	2.4	0.73	-0.542	-1.18	1.23	0.495
LOC_Os03g22350.1	Brix domain containing protein, putative, expressed	0.0109635	2.25e-05	0.408238	0.544	0.0114	0.847	-0.408	-1.01	-0.111	0.0257	0.628	-0.383	-0.271
LOC_Os03g22380.3	RNA recognition motif containing protein, expressed	2.73e-08	2.63e-08	3.02e-09	1.21e-10	9.68e-11	1.82e-13	-2.01	-2.01	-2.56	0.36	0.368	-1.64	0.917
LOC_Os03g22570.2	MIF4G domain containing protein, putative, expressed	8.91e-08	2.25e-05	0.00263815	3.11e-08	0.0113	0.257	-2.38	-1.25	-0.646	1.31	0.178	-1.07	-0.422
LOC_Os03g22730.1	nucleolar protein NOP5-1, putative, expressed	7.21e-05	4.35e-06	0.00154702	0.0404	0.00111	0.194	0.919	1.3	0.6	-0.215	-0.593	0.704	0.104
LOC_Os03g22880.1	nucleolar protein 5A, putative, expressed	1.27e-05	1.7e-06	0.000823385	0.00641	0.00018	0.13	0.959	1.22	0.555	-0.276	-0.535	0.683	0.128
LOC_Os03g23935.1	WD domain, G-beta repeat domain containing protein, expressed	6.74e-07	7.98e-08	1.81e-05	2.43e-05	1.93e-08	0.00162	1.02	1.31	0.693	-0.268	-0.55	0.756	0.0624
LOC_Os03g24770.1	expressed protein	0.00367744	3.57e-06	0.336384	0.41	0.000783	0.836	0.957	2.43	0.251	-0.0469	-1.52	0.91	0.659
LOC_Os03g25390.1	novel plant SNARE 11, putative, expressed	0.000253936	1.96e-06	0.000686724	0.104	0.000242	0.114	0.681	1.25	0.593	-0.0509	-0.617	0.63	0.0375
LOC_Os03g25450.1	h/ACA ribonucleoprotein complex subunit 4, putative, expressed	2.64e-07	2.06e-08	1.85e-05	1.61e-06	2.6e-11	0.00167	1.35	1.79	0.816	-0.357	-0.805	0.989	0.173
LOC_Os03g26200.1	methyltransferase, putative, expressed	2.98e-05	1.69e-05	2.83e-05	0.0178	0.0081	0.00329	-1.08	-1.16	-1.09	0.249	0.328	-0.834	0.256
LOC_Os03g26460.1	CS domain containing protein, putative, expressed	5.7e-07	1.2e-07	0.0290029	1.56e-05	9.83e-08	0.621	7.06	8.43	1.5	-2.81	-4.18	4.25	2.75
LOC_Os03g26630.2	SAP domain containing protein, expressed	4.06e-06	5.99e-08	0.0304396	0.00112	5.75e-09	0.627	1.16	1.89	0.307	-0.323	-1.05	0.84	0.533
LOC_Os03g26960.1	intron-binding protein aquarius, putative, expressed	0.000188501	1.12e-06	0.185135	0.0852	7.28e-05	0.798	0.757	1.42	0.181	-0.167	-0.831	0.59	0.409
LOC_Os03g27010.1	expressed protein	0.000210562	4.57e-05	0.0190474	0.0919	0.025	0.565	0.681	0.83	0.327	-0.221	-0.371	0.46	0.132
LOC_Os03g27970.1	WD domain, G-beta repeat domain containing protein, expressed	6.62e-05	5.46e-06	0.000405507	0.0376	0.00162	0.0749	0.873	1.19	0.686	-0.187	-0.5	0.686	0.000568
LOC_Os03g30430.2	nitrilase-associated protein, putative, expressed	0.116171	0.159418	0.000111345	0.749	0.751	0.0208	0.703	0.62	2.6	0.279	0.361	0.981	-1.62
LOC_Os03g31360.1	glutelin, putative, expressed	8.3e-06	0.00253437	1.15e-05	0.00355	0.344	0.00074	5.35	2.48	5.15	-2.11	0.768	3.24	-1.9
LOC_Os03g32630.1	ABC transporter, ATP-binding protein, putative, expressed	4.9e-05	6.05e-06	0.0518911	0.0292	0.0019	0.688	0.783	1.01	0.245	-0.273	-0.502	0.51	0.265
LOC_Os03g34040.1	ribosomal protein, putative, expressed	0.015047	0.000151497	0.000134992	0.578	0.0719	0.026	-0.361	-0.746	-0.758	-0.105	0.28	-0.466	0.292
LOC_Os03g36540.1	magnesium-chelatase subunit chlI, chloroplast precursor, putative, expressed	0.00153076	7.65e-05	0.000332191	0.295	0.0406	0.0629	-0.431	-0.654	-0.538	0.0254	0.248	-0.406	0.132
LOC_Os03g37320.1	expressed protein	0.0180372	6.23e-05	0.193672	0.597	0.0338	0.801	-0.464	-1.12	-0.227	0.0118	0.667	-0.453	-0.226
LOC_Os03g38260.1	60S ribosomal protein L19-3, putative, expressed	4.56e-06	3.67e-06	0.0622195	0.00136	0.000825	0.707	1.06	1.08	0.235	-0.463	-0.49	0.594	0.359
LOC_Os03g40010.1	DEK C terminal domain containing protein, expressed	7.38e-07	4.17e-08	0.00016115	3.11e-05	1.03e-09	0.0314	1.22	1.69	0.632	-0.334	-0.806	0.886	0.254
LOC_Os03g40110.1	nop14-like family protein, expressed	0.00872162	4.04e-05	0.369534	0.518	0.022	0.842	1.02	2.25	-0.291	-0.276	-1.51	0.746	1.04
LOC_Os03g40180.1	60S ribosomal protein L15, putative, expressed	0.00291294	9e-05	0.000748243	0.38	0.0469	0.122	-0.75	-1.23	-0.924	0.0233	0.506	-0.727	0.197
LOC_Os03g40270.1	alpha-1,4-glucan-protein synthase, putative, expressed	2.44e-07	1.9e-05	0.0304458	1.25e-06	0.00936	0.627	-1.59	-0.953	-0.303	0.879	0.241	-0.712	-0.409
LOC_Os03g40310.1	RNA recognition motif containing protein, putative, expressed	0.000156665	3.28e-07	0.0603665	0.0744	2.7e-06	0.704	1.02	2.14	0.354	-0.138	-1.27	0.879	0.525
LOC_Os03g42130.1	gibberellin 20 oxidase 2, putative, expressed	2.03e-07	0.000245052	0.139165	6.67e-07	0.102	0.777	-6.36	-2.69	0.753	4.29	0.614	-2.07	-2.83
LOC_Os03g44310.1	initiation factor 2 subunit family domain containing protein, expressed	1.29e-05	0.000492632	0.0531248	0.00649	0.154	0.691	0.827	0.516	0.218	-0.437	-0.125	0.39	0.172
LOC_Os03g44900.1	CCR4-NOT transcription factor, putative, expressed	0.649307	1.58e-05	0.00166202	0.842	0.00748	0.201	-0.0625	1.09	0.584	0.466	-0.689	0.404	-0.18
LOC_Os03g45340.1	hsp20/alpha crystallin family protein, putative, expressed	1.82e-05	5.4e-06	0.00828388	0.00996	0.0016	0.44	0.789	0.914	0.327	-0.281	-0.406	0.508	0.18
LOC_Os03g46100.1	cupin domain containing protein, expressed	9.19e-05	0.00496024	0.00176738	0.0495	0.429	0.208	0.655	0.365	-0.433	-0.508	-0.218	0.147	0.579
LOC_Os03g46340.1	pleckstrin homology domain-containing protein, putative, expressed	9.63e-08	1.95e-09	1.75e-06	4.27e-08	2.01e-14	8.1e-06	1.21	1.87	0.867	-0.223	-0.882	0.986	0.119
LOC_Os03g46480.2	ranBP1 domain containing protein, expressed	0.0465428	1.75e-06	0.00205853	0.683	0.00019	0.226	0.752	3.5	1.39	0.657	-2.09	1.41	0.0196
LOC_Os03g46770.1	RNA recognition motif containing protein, expressed	0.00226867	7.75e-05	0.00515923	0.346	0.0411	0.363	-0.723	-1.16	-0.631	0.0936	0.535	-0.63	0.00128
LOC_Os03g47740.3	homeodomain protein, putative, expressed	6.82e-08	0.330686	0.0515358	1.03e-08	0.793	0.687	-2.78	0.185	0.402	2.23	-0.734	-0.549	-0.951
LOC_Os03g49210.1	BRCA1 C Terminus domain containing protein, expressed	1.7e-07	6.78e-08	0.000552949	3.53e-07	9.78e-09	0.0962	1.36	1.51	0.503	-0.517	-0.666	0.843	0.34
LOC_Os03g49485.1	expressed protein	5.37e-05	3.82e-07	0.019662	0.0316	4.26e-06	0.57	1.14	2.06	0.455	-0.226	-1.14	0.913	0.457
LOC_Os03g49520.1	pinin/SDK/memA protein, putative, expressed	0.897927	0.000915938	0.000203691	0.858	0.218	0.0397	0.0162	0.59	-0.728	-0.0467	-0.62	-0.0305	0.697
LOC_Os03g50090.4	transposon protein, putative, CACTA, En/Spm sub-class, expressed	2.49e-08	4.25e-09	7.65e-05	7.38e-11	2.01e-14	0.0136	1.57	1.91	0.609	-0.546	-0.887	1.02	0.412
LOC_Os03g50290.3	14-3-3 protein, putative, expressed	0.00383668	1.28e-05	0.216655	0.416	0.00573	0.809	-0.349	-0.768	-0.121	0.04	0.458	-0.309	-0.189
LOC_Os03g50340.1	coatomer alpha subunit, putative, expressed	0.0104597	0.0392373	0.00020251	0.539	0.649	0.0395	0.383	0.287	0.709	-0.0382	0.0577	0.345	-0.364
LOC_Os03g50520.1	dynamin family protein, putative, expressed	6.11e-06	1.14e-05	0.000101594	0.00221	0.0049	0.0187	0.898	0.833	0.633	-0.307	-0.242	0.591	-0.0423
LOC_Os03g51250.1	adenylyl cyclase-associated protein, putative, expressed	1.04e-05	7.32e-05	7.65e-05	0.00492	0.0391	0.0136	0.952	0.747	0.743	-0.342	-0.137	0.61	-0.132
LOC_Os03g51520.2	fip1 motif family protein, expressed	0.000153775	2.01e-06	0.132206	0.0734	0.000253	0.773	1.67	2.85	0.449	-0.428	-1.61	1.24	0.795
LOC_Os03g52490.1	nucleic acid binding protein, putative, expressed	1.53e-06	6.41e-08	3.95e-07	0.000169	7.69e-09	4.84e-08	-1.02	-1.47	-1.2	0.101	0.548	-0.922	0.274
LOC_Os03g52840.1	serine hydroxymethyltransferase, mitochondrial precursor, putative, expressed	1.02e-06	1.43e-05	2.13e-05	7.1e-05	0.00665	0.0021	1.51	1.1	1.05	-0.592	-0.187	0.914	-0.135
LOC_Os03g53270.1	stem-specific protein TSJT1, putative, expressed	2.83e-06	0.15812	0.242026	0.000591	0.75	0.816	-2.18	-0.332	0.27	1.62	-0.229	-0.561	-0.831
LOC_Os03g53670.2	YT521-B-like family domain containing protein, expressed	7.66e-05	0.0220215	0.0379527	0.0424	0.596	0.654	-1.31	-0.533	0.469	0.963	0.19	-0.342	-0.812
LOC_Os03g53720.1	SRPK4, putative, expressed	0.00370038	6.86e-05	0.0232059	0.411	0.0369	0.592	-0.999	-1.77	-0.704	0.131	0.902	-0.868	-0.164
LOC_Os03g53860.4	periplasmic beta-glucosidase precursor, putative, expressed	0.00170878	0.000555382	2e-05	0.309	0.165	0.00191	-0.432	-0.51	-0.788	-0.000726	0.0775	-0.432	0.356
LOC_Os03g54040.1	ribosomal protein L6, putative, expressed	1.2e-09	8.03e-11	6.35e-06	3.25e-14	2.01e-14	0.000219	2.19	2.94	0.825	-0.697	-1.45	1.49	0.663
LOC_Os03g54790.1	ABC transporter, ATP-binding protein, putative, expressed	3.86e-08	3.97e-06	2.2e-06	7.45e-10	0.000947	1.56e-05	-1.71	1	1.08	1.8	-0.91	0.0929	-0.982
LOC_Os03g54890.2	ribosomal protein L13, putative, expressed	0.0355661	0.00307533	9.06e-05	0.661	0.369	0.0165	-0.282	-0.455	-0.755	-0.0913	0.0825	-0.373	0.382
LOC_Os03g56800.1	CBS domain containing membrane protein, putative, expressed	1.25e-07	0.000321137	0.659866	1.19e-07	0.121	0.872	-1.74	-0.669	-0.0546	1.12	0.0543	-0.615	-0.56
LOC_Os03g57430.1	expressed protein	5.07e-07	0.828261	0.313975	1.14e-05	0.84	0.832	-3.65	0.0661	-0.315	2.67	-1.04	-0.974	-0.659
LOC_Os03g57960.1	cupin domain containing protein, expressed	0.0265382	0.184707	9.84e-06	0.634	0.76	0.000549	0.251	-0.136	-0.828	-0.429	-0.0419	-0.178	0.649
LOC_Os03g58060.1	XRN 5'-3' exonuclease N-terminus domain containing protein, expressed	8.18e-06	0.0811673	0.00879617	0.00348	0.706	0.45	-1.97	0.434	0.733	1.77	-0.634	-0.201	-0.934
LOC_Os03g58340.1	expressed protein	3.26e-05	7.12e-07	0.000438851	0.0196	2.3e-05	0.0801	-1.93	-3.05	-1.37	0.343	1.46	-1.59	-0.216
LOC_Os03g58470.1	retrotransposon protein, putative, Ty3-gypsy subclass, expressed	3.52e-06	1.56e-08	7.68e-05	0.000882	5.23e-12	0.0137	1.19	2.21	0.816	-0.137	-1.16	1.05	0.239
LOC_Os03g58480.2	seed specific protein Bn15D14A, putative, expressed	1.23e-05	0.000341478	0.00656803	0.00615	0.125	0.403	6.22	4.06	2.57	-3.01	-0.848	3.21	0.644
LOC_Os03g58540.1	spo0B-associated GTP-binding protein, putative, expressed	2.11e-05	1.46e-05	0.000174751	0.0119	0.00677	0.0342	0.914	0.956	0.698	-0.272	-0.314	0.642	-0.0557
LOC_Os03g58700.1	vacuolar protein sorting-associated protein 35, putative, expressed	4.61e-05	1.11e-05	9.11e-05	0.0277	0.00473	0.0166	-1.49	-1.77	-1.36	0.331	0.617	-1.16	0.207
LOC_Os03g58720.1	RNA recognition motif containing protein, putative, expressed	1.65e-06	1.47e-07	5.21e-06	0.000197	2.02e-07	0.000138	-0.932	-1.23	-0.813	0.188	0.486	-0.744	0.0697
LOC_Os03g58810.1	DEAD-box ATP-dependent RNA helicase, putative, expressed	1.12e-07	9.69e-09	1.01e-05	7.79e-08	2.34e-13	0.000577	1.52	1.99	0.898	-0.414	-0.892	1.1	0.204
LOC_Os03g59020.1	T-complex protein, putative, expressed	0.719991	8.21e-05	0.000942789	0.847	0.0432	0.143	0.046	0.831	0.595	0.322	-0.463	0.368	-0.227
LOC_Os03g59700.1	peptidyl-prolyl cis-trans isomerase, putative, expressed	1.49e-05	1.69e-06	0.00169089	0.00775	0.000176	0.203	1.3	1.68	0.686	-0.381	-0.764	0.916	0.23
LOC_Os03g60090.2	methylenetetrahydrofolate reductase, putative, expressed	3.37e-07	3.5e-05	0.000469689	3.49e-06	0.0189	0.0847	-1.28	-0.738	0.524	0.907	0.364	-0.374	-0.898
LOC_Os03g60180.1	GTPase of unknown function domain containing protein, putative, expressed	1e-06	1.02e-08	2.52e-05	6.82e-05	3.36e-13	0.00275	1.11	1.87	0.756	-0.177	-0.933	0.933	0.177
LOC_Os03g61030.1	transcription termination factor nusG family protein, expressed	7.46e-06	2.79e-07	0.326711	0.00303	1.63e-06	0.834	0.738	1.08	0.085	-0.262	-0.606	0.476	0.391
LOC_Os03g61220.2	DEAD-box ATP-dependent RNA helicase 3, putative, expressed	4.52e-05	4.57e-05	1.29e-06	0.0272	0.025	3.28e-06	-0.713	-0.712	-1.09	0.0831	0.0822	-0.63	0.465
LOC_Os03g61640.1	ZOS3-23 - C2H2 zinc finger protein, expressed	0.000116396	1.7e-05	0.004738	0.0595	0.00816	0.349	1.87	2.39	1.09	-0.536	-1.05	1.34	0.251
LOC_Os03g62620.4	late embryogenesis abundant protein, putative, expressed	1.49e-05	0.00206817	0.555276	0.0078	0.318	0.864	-2.21	-1.13	0.163	1.41	0.338	-0.795	-0.958
LOC_Os03g62630.1	ribosomal protein S6, putative, expressed	0.0649169	0.0104454	8.68e-05	0.709	0.517	0.0158	-0.248	-0.38	-0.785	-0.105	0.0263	-0.353	0.432
LOC_Os03g63040.1	expressed protein	3.76e-05	0.00011392	0.0488307	0.0228	0.0574	0.682	2.56	2.22	0.786	-1.17	-0.828	1.39	0.604
LOC_Os03g63480.1	ankyrin repeat domain containing protein, expressed	0.000161414	4.94e-06	9.29e-05	0.0761	0.00138	0.017	-0.728	1.12	0.782	1.02	-0.83	0.295	-0.488
LOC_Os03g63530.2	histone-like transcription factor and archaeal histone, putative, expressed	0.000138961	6.18e-07	0.00875811	0.0678	1.61e-05	0.449	1.02	1.96	0.539	-0.136	-1.08	0.879	0.339
LOC_Os03g63550.1	expressed protein	2.83e-05	0.000123305	0.0149718	0.0168	0.0613	0.531	1.4	1.16	0.548	-0.624	-0.385	0.779	0.231
LOC_Os03g63730.1	RNA recognition motif containing protein, putative, expressed	2.33e-05	3.23e-06	0.00396862	0.0133	0.000652	0.321	0.892	1.13	0.434	-0.277	-0.517	0.614	0.18
LOC_Os03g63950.1	plastid-specific 30S ribosomal protein 1, chloroplast precursor, putative, expressed	5.28e-07	1.74e-07	5.35e-05	1.27e-05	3.51e-07	0.00877	1.82	2.07	1.05	-0.588	-0.835	1.24	0.187
LOC_Os03g64050.1	receptor protein kinase, putative, expressed	3.74e-05	0.00897012	0.00522693	0.0226	0.5	0.365	2.49	1.11	1.23	-1.28	0.0948	1.21	-0.0196
LOC_Os03g64110.1	WD domain, G-beta repeat domain containing protein, expressed	0.0155971	0.0255232	0.00015125	0.582	0.61	0.0294	0.425	0.382	0.885	-0.00182	0.041	0.423	-0.462
LOC_Os03g64300.1	THION30 - Plant thionin family protein precursor, expressed	7.15e-12	0.421541	2.58e-05	3.25e-14	0.806	0.00284	-5.18	-0.102	0.94	4.09	-0.983	-1.09	-2.03
LOC_Os03g64320.1	expressed protein	0.000172465	2.33e-06	0.00671612	0.0799	0.00034	0.406	1.59	2.72	0.915	-0.288	-1.41	1.31	0.391
LOC_Os04g02000.1	zinc finger family protein, putative, expressed	4.42e-05	0.025195	0.0117383	0.0266	0.609	0.495	-1.86	-0.686	-0.806	1.02	-0.151	-0.838	-0.0319
LOC_Os04g02150.2	tRNA methyltransferase, putative, expressed	3.99e-06	2e-06	5.39e-05	0.00109	0.000253	0.00886	-2.34	-2.54	-1.7	0.695	0.893	-1.65	0.0573
LOC_Os04g02200.1	retrotransposon protein, putative, unclassified, expressed	0.000123232	5.47e-06	0.00336905	0.0621	0.00163	0.295	1.41	2.07	0.871	-0.32	-0.985	1.09	0.217
LOC_Os04g02870.2	RNA recognition motif containing protein, putative, expressed	3.54e-06	1.34e-06	1.27e-06	0.000892	0.000107	3.19e-06	-2.15	-2.41	-2.42	0.404	0.664	-1.75	0.678
LOC_Os04g06770.2	argonaute, putative, expressed	3.63e-10	7.36e-11	4.28e-09	3.25e-14	2.01e-14	1.82e-13	-2.13	-2.54	-1.62	0.558	0.966	-1.57	0.0494
LOC_Os04g16680.1	fructose-1,6-bisphosphatase, putative, expressed	0.00129903	2.8e-05	0.000109059	0.273	0.0146	0.0203	-0.574	-0.964	-0.811	-0.0133	0.377	-0.587	0.224
LOC_Os04g17050.1	glutaredoxin family protein, expressed	1.9e-05	0.000995604	0.005667	0.0104	0.228	0.379	1.11	0.657	0.497	-0.546	-0.0903	0.566	0.0697
LOC_Os04g18090.1	histone H1, putative, expressed	7.93e-08	9.44e-09	2.15e-06	1.89e-08	2e-13	1.47e-05	1.88	2.39	1.29	-0.493	-0.999	1.39	0.101
LOC_Os04g23830.1	exonuclease, putative, expressed	1.43e-06	9.76e-06	5.38e-06	0.000148	0.00397	0.000149	-5.41	-4.31	-4.63	1.82	0.723	-3.59	1.04
LOC_Os04g24140.1	ribose-5-phosphate isomerase A, putative, expressed	5.91e-05	0.715633	0.76295	0.0342	0.833	0.88	-2.98	0.161	-0.133	2.25	-0.9	-0.739	-0.606
LOC_Os04g26910.1	oxidoreductase, aldo/keto reductase family protein, putative, expressed	5.16e-09	0.00042987	0.801187	3.25e-14	0.143	0.882	-2.51	-0.65	-0.0315	1.71	-0.148	-0.798	-0.766
LOC_Os04g27980.1	glycosyl hydrolase, putative, expressed	1.26e-05	2.52e-07	6.74e-05	0.00633	1.17e-06	0.0118	-1.45	-2.29	-1.18	0.22	1.06	-1.23	-0.0532
LOC_Os04g28090.1	MYB family transcription factor, putative, expressed	1.51e-06	7.63e-08	0.00553758	0.000164	1.61e-08	0.375	0.935	1.32	0.31	-0.295	-0.676	0.64	0.33
LOC_Os04g28990.1	dehydrogenase, putative, expressed	4.02e-05	8.84e-06	0.00191596	0.0244	0.00344	0.217	0.867	1.04	0.509	-0.262	-0.439	0.605	0.0962
LOC_Os04g30430.1	nuclear transport factor 2, putative, expressed	4.64e-05	0.00409426	0.00191528	0.0278	0.405	0.217	-1.66	-0.875	-0.99	0.777	-0.00552	-0.881	0.11
LOC_Os04g30890.1	MYB family transcription factor, putative, expressed	3.69e-06	5.3e-05	0.0812546	0.000959	0.029	0.732	1.17	0.847	0.235	-0.609	-0.284	0.564	0.329
LOC_Os04g30910.2	SAM domain family protein, expressed	3.78e-05	9.68e-06	0.00512522	0.0229	0.00392	0.362	3.72	4.4	1.84	-1.23	-1.91	2.49	0.648
LOC_Os04g32330.2	dihydrolipoyllysine-residue succinyltransferase component of 2-oxoglutarate dehydrogenase complex, mitochondrial precursor, putative, expressed	1.12e-05	0.00112619	0.0114121	0.00541	0.242	0.49	0.744	0.404	0.274	-0.388	-0.0488	0.355	0.0819
LOC_Os04g32710.1	40S ribosomal protein S27, putative, expressed	0.000435326	0.00158342	3.57e-05	0.147	0.284	0.00479	-0.846	-0.7	-1.18	0.165	0.0197	-0.681	0.495
LOC_Os04g34600.1	abscisic stress-ripening, putative, expressed	2.36e-07	0.144532	0.011254	1.12e-06	0.745	0.488	-3.6	-0.427	0.847	2.81	-0.369	-0.796	-1.64
LOC_Os04g35920.2	nonsense-mediated decay UPF3, putative, expressed	3.4e-07	2.21e-07	0.000101442	3.6e-06	7.83e-07	0.0187	2.18	2.29	1.1	-0.789	-0.899	1.39	0.294
LOC_Os04g36890.1	peptidyl-prolyl cis-trans isomerase, FKBP-type, putative, expressed	1.74e-05	1.92e-07	0.000461725	0.0094	4.9e-07	0.0835	0.896	1.52	0.585	-0.146	-0.77	0.751	0.165
LOC_Os04g38600.3	glyceraldehyde-3-phosphate dehydrogenase, putative, expressed	2.18e-08	5.97e-08	1.57e-05	3.63e-11	5.65e-09	0.00128	1.33	1.19	0.621	-0.545	-0.403	0.784	0.163
LOC_Os04g38750.1	plastid-specific 30S ribosomal protein 3, chloroplast precursor, putative, expressed	0.000519806	2.25e-05	0.000371581	0.165	0.0113	0.0695	-0.659	-0.994	-0.69	0.0729	0.408	-0.586	0.105
LOC_Os04g38870.5	14-3-3 protein, putative, expressed	0.000135555	2.39e-05	0.0258013	0.0666	0.0121	0.606	-0.713	-0.889	-0.302	0.237	0.413	-0.476	-0.174
LOC_Os04g38960.1	expressed protein	0.00488446	0.00288062	0.000221945	0.447	0.36	0.0433	2.4	2.62	3.82	-0.189	-0.412	2.21	-1.61
LOC_Os04g39040.1	UBA and UBX domain-containing protein, putative, expressed	0.626652	6.55e-06	0.000102173	0.84	0.00215	0.0188	-0.162	2.95	2.09	1.38	-1.73	1.22	-0.875
LOC_Os04g39700.1	60S ribosomal protein L6, putative, expressed	3.47e-07	6.37e-08	4.47e-06	3.83e-06	7.51e-09	9.32e-05	-1.68	-2.04	-1.25	0.439	0.795	-1.24	0.0071
LOC_Os04g40040.1	copper methylamine oxidase precursor, putative, expressed	6.57e-05	1.05e-05	0.0123239	0.0374	0.00441	0.502	0.745	0.935	0.337	-0.241	-0.431	0.504	0.168
LOC_Os04g40320.1	expressed protein	6.99e-09	2.78e-09	0.000367039	3.25e-14	2.01e-14	0.0687	5.36	5.93	1.47	-2.17	-2.74	3.19	1.72
LOC_Os04g40950.1	glyceraldehyde-3-phosphate dehydrogenase, putative, expressed	9.84e-06	4.93e-05	0.000300608	0.00455	0.027	0.0576	0.84	0.689	0.543	-0.322	-0.171	0.518	-0.0251
LOC_Os04g41260.1	amine oxidase, flavin-containing, domain containing protein, expressed	1.44e-07	1.72e-07	1.62e-05	1.99e-07	3.41e-07	0.00135	1.82	1.78	1.05	-0.656	-0.62	1.16	0.115
LOC_Os04g42140.1	eukaryotic initiation factor iso-4F subunit p82-34, putative, expressed	0.00259684	3.17e-06	0.00260719	0.364	0.00063	0.256	0.349	0.85	0.349	0.0378	-0.463	0.387	0.038
LOC_Os04g42320.1	AT hook motif family protein, expressed	2.29e-09	1.03e-10	3e-07	3.25e-14	2.01e-14	1.41e-08	1.9	2.67	1.1	-0.481	-1.25	1.42	0.318
LOC_Os04g44610.1	white-brown complex homolog protein 11, putative, expressed	0.0378331	0.00136503	0.000183905	0.666	0.266	0.036	-1.12	-2.08	-2.77	-0.375	0.591	-1.49	1.28
LOC_Os04g45070.1	remorin, putative, expressed	2.24e-05	2.07e-05	0.404944	0.0127	0.0103	0.847	0.993	1	0.11	-0.467	-0.476	0.526	0.416
LOC_Os04g45490.1	elongation factor, putative, expressed	0.00231258	0.00153236	1.41e-05	0.349	0.28	0.00106	-0.754	-0.804	-1.51	-0.0124	0.0377	-0.766	0.741
LOC_Os04g45670.1	src homology-3 domain protein 3, putative, expressed	0.000931525	6.47e-08	1.13e-05	0.232	7.99e-09	0.00071	0.535	1.74	0.955	0.272	-0.931	0.807	-0.148
LOC_Os04g45930.3	RNA recognition motif containing protein, expressed	0.000805509	0.00261865	0.00025577	0.214	0.348	0.0496	-0.726	-0.606	-0.853	0.18	0.0598	-0.546	0.307
LOC_Os04g46620.1	T-complex protein, putative, expressed	8.95e-05	1.85e-05	0.00142098	0.0484	0.00905	0.185	0.857	1.05	0.583	-0.236	-0.424	0.621	0.0381
LOC_Os04g47520.3	growth regulator related protein, putative, expressed	0.02108	2.01e-05	0.751284	0.613	0.00997	0.879	-1.13	-3.24	-0.133	0.00307	2.11	-1.12	-0.992
LOC_Os04g47870.2	PINHEAD, putative, expressed	0.000535726	3.42e-05	0.00164079	0.168	0.0184	0.2	-0.703	-1.01	-0.596	0.125	0.434	-0.578	0.0183
LOC_Os04g50204.1	protein transport protein-related, putative, expressed	0.209517	8.78e-08	0.00891717	0.784	2.88e-08	0.452	0.12	1.34	0.294	0.318	-0.9	0.438	0.144
LOC_Os04g50990.1	L11 domain containing ribosomal protein, putative, expressed	3.82e-05	1.11e-05	0.000102933	0.0231	0.00471	0.0189	1.87	2.18	1.65	-0.446	-0.755	1.42	-0.224
LOC_Os04g51120.3	ENTH domain containing protein, expressed	0.00305959	4.04e-05	0.562296	0.386	0.022	0.864	0.522	0.959	0.0788	-0.132	-0.569	0.39	0.311
LOC_Os04g51900.1	expressed protein	0.0731975	7.94e-05	0.12342	0.717	0.042	0.768	-0.335	1.11	0.281	0.599	-0.847	0.264	-0.0166
LOC_Os04g51960.1	expressed protein	1.31e-06	8.56e-09	0.000126345	0.000124	9.41e-14	0.0241	1.22	2.15	0.696	-0.201	-1.14	1.02	0.32
LOC_Os04g52130.1	coproporphyrinogen III oxidase, chloroplast precursor, putative, expressed	0.000345877	9.08e-05	0.0265731	0.127	0.0473	0.61	-1.39	-1.66	-0.665	0.462	0.734	-0.93	-0.265
LOC_Os04g52960.1	nucleolin, putative, expressed	2.36e-05	1.11e-06	1.42e-05	0.0136	7.1e-05	0.00108	0.853	1.23	0.908	-0.106	-0.481	0.747	-0.161
LOC_Os04g53230.1	aminomethyltransferase, putative, expressed	1.71e-06	1.15e-05	6.29e-05	0.000214	0.00497	0.0108	1.11	0.885	0.717	-0.432	-0.207	0.678	-0.0389
LOC_Os04g54440.3	RNA binding protein, putative, expressed	2.39e-06	1.44e-06	1.44e-05	0.000422	0.000127	0.00111	-1.27	-1.35	-1.02	0.36	0.437	-0.911	0.114
LOC_Os04g55220.1	C2 domain containing protein, expressed	1.84e-05	1.15e-05	0.00268679	0.0101	0.00495	0.26	0.859	0.91	0.434	-0.309	-0.359	0.551	0.117
LOC_Os04g55520.1	AP2 domain containing protein, expressed	5.1e-05	5.81e-07	0.00172001	0.0303	1.37e-05	0.205	-1.03	-1.77	-0.636	0.175	0.909	-0.86	-0.224
LOC_Os04g56350.1	nucleolar protein,Nop52 containing protein, expressed	2.05e-05	6.65e-05	0.101055	0.0115	0.0359	0.751	1	0.865	0.23	-0.478	-0.341	0.524	0.295
LOC_Os04g56400.1	glutamine synthetase, catalytic domain containing protein, expressed	5.98e-05	3.32e-07	2.15e-06	0.0345	2.81e-06	1.47e-05	-0.612	-1.14	-0.917	-0.0547	0.471	-0.666	0.25
LOC_Os04g56590.1	ATP/GTP binding protein, putative, expressed	0.0206732	7.22e-05	0.0152671	0.611	0.0386	0.534	-0.315	-0.767	-0.336	-0.0395	0.413	-0.355	-0.0187
LOC_Os04g56720.1	RCC2, putative, expressed	1.18e-06	4.49e-08	1.61e-07	9.92e-05	1.48e-09	7.91e-10	-0.919	-1.33	-1.15	0.067	0.482	-0.852	0.303
LOC_Os04g57610.3	auxin response factor, putative, expressed	0.000739896	7.41e-06	4.15e-06	0.204	0.00263	7.75e-05	-0.578	1.05	1.13	0.977	-0.651	0.399	-0.726
LOC_Os04g57810.2	GA18008-PA, putative, expressed	2.31e-06	0.129464	0.835097	0.000394	0.738	0.884	-2.56	-0.413	-0.0531	1.81	-0.344	-0.757	-0.704
LOC_Os04g58640.1	cleavage and polyadenylation specificity factor subunit 5, putative, expressed	1.28e-05	0.00059954	5.98e-05	0.00645	0.172	0.0102	-0.95	-0.576	-0.785	0.373	-0.00185	-0.578	0.207
LOC_Os04g58830.1	ribosome biogenesis regulatory protein, putative, expressed	2.58e-08	1.03e-09	7.04e-06	8.97e-11	2.01e-14	0.000273	1.58	2.25	0.826	-0.411	-1.09	1.16	0.337
LOC_Os04g59200.1	peroxidase precursor, putative, expressed	0.0129907	0.00331716	0.000190868	0.563	0.378	0.0373	-0.326	-0.417	-0.635	-0.0185	0.0727	-0.345	0.29
LOC_Os04g59494.1	transportin-2, putative, expressed	2.45e-06	3.99e-08	0.0246382	0.000444	8.36e-10	0.6	1.33	2.12	0.347	-0.377	-1.17	0.949	0.602
LOC_Os05g01050.3	DNA-binding protein-related, putative, expressed	0.000138247	1.5e-05	0.0370348	0.0676	0.00703	0.651	0.974	1.29	0.38	-0.313	-0.629	0.661	0.281
LOC_Os05g01820.1	cytochrome b5-like Heme/Steroid binding domain containing protein, expressed	2.45e-05	2.38e-05	4.44e-06	0.0142	0.0121	9.18e-05	0.872	0.875	1.07	-0.167	-0.17	0.705	-0.367
LOC_Os05g02400.1	RNA recognition motif containing protein, expressed	0.00052947	7.62e-05	0.0292841	0.167	0.0405	0.622	-2.56	-3.32	1.27	1.41	2.17	-1.15	-2.42
LOC_Os05g02680.1	nuclear factor related to kappa-B-binding protein, related, putative, expressed	0.00223742	3.7e-05	0.0464913	0.345	0.0201	0.676	3	5.29	1.64	-0.514	-2.8	2.48	0.838
LOC_Os05g02820.1	protein transport protein-related, putative, expressed	3.92e-05	1.37e-06	0.0115374	0.0237	0.000114	0.492	0.852	1.28	0.365	-0.229	-0.652	0.623	0.258
LOC_Os05g03190.1	IQ calmodulin-binding motif domain containing protein, expressed	1.85e-06	2.8e-06	0.0273169	0.00025	0.000495	0.614	1.5	1.42	0.369	-0.673	-0.602	0.822	0.453
LOC_Os05g04850.2	RNA recognition motif containing protein, putative, expressed	8.9e-06	0.0279859	3.69e-05	0.00394	0.619	0.00506	-1.04	-0.308	-0.874	0.485	-0.248	-0.556	0.318
LOC_Os05g05660.1	PWWP domain containing protein, expressed	1.17e-06	1.64e-06	0.00171351	9.69e-05	0.000165	0.204	1.25	1.2	0.489	-0.516	-0.468	0.736	0.247
LOC_Os05g05670.1	1-aminocyclopropane-1-carboxylate oxidase, putative, expressed	1.42e-05	3.6e-06	0.000117065	0.00732	0.000795	0.022	1.28	1.5	0.977	-0.336	-0.564	0.939	-0.0386
LOC_Os05g05830.1	bifunctional protein folD, putative, expressed	3.07e-05	0.00210069	7.14e-05	0.0184	0.32	0.0126	0.626	0.35	0.562	-0.241	0.0346	0.384	-0.178
LOC_Os05g06350.1	importin subunit alpha, putative, expressed	5.29e-05	2.1e-06	0.00447589	0.0312	0.000277	0.34	0.606	0.897	0.321	-0.15	-0.441	0.456	0.135
LOC_Os05g06970.1	peroxidase precursor, putative, expressed	3.34e-05	1.13e-05	0.0199615	0.0202	0.00485	0.572	-0.988	-1.13	-0.371	0.366	0.507	-0.622	-0.251
LOC_Os05g07730.1	retrotransposon protein, putative, unclassified, expressed	1.44e-05	0.160988	0.309762	0.00748	0.751	0.831	-5.37	-0.986	0.695	3.95	-0.429	-1.42	-2.11
LOC_Os05g08360.1	rRNA 2-O-methyltransferase fibrillarin 2, putative, expressed	2.4e-06	4.16e-07	0.000608164	0.000424	5.42e-06	0.104	0.907	1.11	0.449	-0.29	-0.494	0.617	0.168
LOC_Os05g08990.1	glutaminyl-tRNA synthetase, putative, expressed	0.000343587	1.5e-05	0.00033221	0.126	0.00702	0.0629	-0.718	-1.07	-0.721	0.0894	0.446	-0.628	0.0927
LOC_Os05g16630.2	thioredoxin domain-containing protein 9, putative, expressed	9.64e-07	0.0777218	0.179226	6.18e-05	0.703	0.796	-4.1	-0.711	-0.521	2.77	-0.622	-1.33	-0.812
LOC_Os05g22260.1	crooked neck, putative, expressed	1.9e-06	2.35e-08	5.01e-05	0.000263	5.18e-11	0.00801	1.1	1.81	0.737	-0.186	-0.897	0.91	0.173
LOC_Os05g22614.1	PTAC16, putative, expressed	5.4e-07	2.09e-07	0.00605142	1.35e-05	6.57e-07	0.389	1.37	1.53	0.398	-0.548	-0.706	0.826	0.428
LOC_Os05g22940.1	acetyl-CoA carboxylase, putative, expressed	3.31e-11	2.2e-09	0.00136017	3.25e-14	2.01e-14	0.18	4.08	2.57	0.512	-2.29	-0.78	1.79	1.28
LOC_Os05g22970.1	glyoxalase family protein, putative, expressed	9.12e-05	0.000290559	0.542499	0.0492	0.114	0.862	-4.7	-4.03	0.451	2.63	1.96	-2.07	-2.52
LOC_Os05g24160.2	double-stranded RNA binding motif containing protein, expressed	0.00305118	9.88e-06	0.00120216	0.386	0.00404	0.167	-0.404	-0.882	-0.468	-0.0343	0.443	-0.438	0.0292
LOC_Os05g24601.2	coatomer subunit delta, putative, expressed	3.67e-05	0.00403004	0.79702	0.0223	0.403	0.882	-0.862	0.443	-0.0308	0.749	-0.556	-0.112	-0.0815
LOC_Os05g28280.1	peptidase, M24 family protein, putative, expressed	5.31e-08	1.01e-07	3.74e-06	3.43e-09	5.03e-08	5.95e-05	-1.33	-1.24	-0.817	0.485	0.392	-0.847	-0.03
LOC_Os05g28740.1	universal stress protein domain containing protein, putative, expressed	6.92e-09	0.00122695	2.11e-05	3.25e-14	0.253	0.00206	-1.89	0.434	0.749	1.71	-0.61	-0.176	-0.925
LOC_Os05g28940.1	GTP-binding protein, putative, expressed	7.05e-06	1.7e-05	5.98e-05	0.00278	0.00817	0.0101	1.02	0.916	0.783	-0.339	-0.236	0.679	-0.103
LOC_Os05g30140.2	RNA recognition motif containing protein, expressed	3.85e-06	1.6e-06	3.03e-06	0.00103	0.000159	3.58e-05	-1.97	-2.18	-2.03	0.425	0.638	-1.54	0.482
LOC_Os05g30420.1	expressed protein	6.05e-05	5.41e-06	0.000380618	0.0348	0.0016	0.0709	1.94	2.61	1.52	-0.422	-1.09	1.52	-0.0026
LOC_Os05g31000.1	nascent polypeptide-associated complex subunit alpha, putative, expressed	0.00061648	8.75e-06	0.443515	0.183	0.00339	0.852	-0.481	0.834	-0.0757	0.55	-0.765	0.0694	0.145
LOC_Os05g31140.3	glycosyl hydrolases family 17, putative, expressed	5.83e-05	2.28e-06	0.00023163	0.0338	0.000328	0.0451	-0.729	-1.08	-0.608	0.124	0.476	-0.604	0.00388
LOC_Os05g32590.1	methyltransferase, putative, expressed	1.53e-05	0.0113868	0.0151805	0.008	0.527	0.533	-2.98	-1.14	1.08	2.22	0.379	-0.762	-1.84
LOC_Os05g35710.1	coiled-coil domain-containing protein 47 precursor, putative, expressed	5.15e-05	0.000131731	0.00318872	0.0305	0.0646	0.286	0.751	0.666	0.419	-0.292	-0.207	0.459	0.0399
LOC_Os05g38570.1	riboflavin biosynthesis protein ribAB, chloroplast precursor, putative, expressed	5.13e-05	0.0732708	0.204029	0.0304	0.698	0.805	1.34	0.382	0.258	-0.845	0.113	0.495	0.237
LOC_Os05g38810.1	PWWP domain containing protein, expressed	0.000683887	5.74e-05	0.0177125	0.195	0.0313	0.555	-1.12	-1.56	-0.642	0.287	0.729	-0.829	-0.187
LOC_Os05g39610.2	exo70 exocyst complex subunit domain containing protein, expressed	0.00166662	0.00134646	0.000247976	0.306	0.264	0.0481	-0.965	0.997	1.27	1.29	-0.672	0.326	-0.944
LOC_Os05g42350.1	ferredoxin--nitrite reductase, putative, expressed	8.59e-06	2.62e-05	0.0193795	0.00373	0.0135	0.568	-0.995	-0.868	-0.318	0.449	0.323	-0.545	-0.227
LOC_Os05g43650.1	expressed protein	3.62e-08	1.63e-07	1.64e-05	5.38e-10	2.87e-07	0.00137	1.88	1.59	0.925	-0.783	-0.489	1.1	0.174
LOC_Os05g45830.1	expressed protein	0.000437846	5.24e-06	0.0129672	0.147	0.00152	0.51	0.932	1.64	0.536	-0.155	-0.861	0.776	0.24
LOC_Os05g46230.1	NAP domain containing protein, putative, expressed	2.5e-06	6.23e-07	7.8e-05	0.000461	1.65e-05	0.0139	-0.87	-1.02	-0.571	0.254	0.407	-0.616	-0.0446
LOC_Os05g46270.1	FEN1A - Putative flap endonuclease protein, expressed	1.41e-08	2.76e-09	0.000746161	2.67e-12	2.01e-14	0.121	1.84	2.2	0.492	-0.704	-1.07	1.13	0.641
LOC_Os05g46430.1	60S ribosomal protein L28-1, putative, expressed	1.41e-05	1.56e-06	0.42822	0.00724	0.00015	0.85	1.79	2.32	0.178	-0.716	-1.25	1.07	0.894
LOC_Os05g46490.2	mov34 family protein, putative, expressed	8.17e-06	7.64e-06	0.000418535	0.00346	0.00276	0.0769	6.07	6.12	3.66	-2.11	-2.15	3.96	0.298
LOC_Os05g46780.1	transposon protein, putative, CACTA, En/Spm sub-class, expressed	0.00749495	2.95e-06	6.86e-08	0.5	0.000546	5.57e-12	-0.364	1.07	-1.65	0.128	-1.31	-0.235	1.41
LOC_Os05g47850.1	chloroplastic group IIA intron splicing facilitator CRS1, chloroplast precursor, putative, expressed	6.81e-05	3.67e-05	0.00793777	0.0385	0.0199	0.433	0.861	0.931	0.425	-0.307	-0.377	0.554	0.13
LOC_Os05g48422.1	60S ribosomal protein-related, putative, expressed	9.43e-06	3.89e-07	0.00613768	0.00428	4.49e-06	0.392	0.913	1.33	0.369	-0.261	-0.674	0.652	0.283
LOC_Os05g48500.3	expressed protein	1.53e-06	0.557556	0.737045	0.000169	0.82	0.878	-2.7	-0.152	0.0863	2.01	-0.541	-0.693	-0.779
LOC_Os05g48510.1	phenylalanyl-tRNA synthetase beta chain, putative, expressed	5.38e-05	1.56e-06	0.0028113	0.0317	0.00015	0.267	0.756	1.16	0.433	-0.169	-0.572	0.587	0.154
LOC_Os05g48630.2	expressed protein	0.00192613	0.00190628	9.6e-05	0.325	0.308	0.0176	-1.46	-1.47	-2.23	0.173	0.175	-1.29	0.942
LOC_Os05g48960.4	splicing factor U2AF, putative, expressed	5.28e-06	1.45e-06	7.94e-06	0.00174	0.000129	0.000352	-1.01	-1.18	-0.965	0.224	0.39	-0.789	0.176
LOC_Os05g49030.1	60S ribosomal protein L18a, putative, expressed	0.000672269	3.96e-05	0.00097974	0.193	0.0216	0.146	-0.675	-0.986	-0.639	0.1	0.411	-0.575	0.0642
LOC_Os05g49050.1	CobW/P47K family protein, putative, expressed	0.00224124	6.42e-05	0.00147174	0.345	0.0347	0.188	-0.55	-0.906	-0.588	0.0393	0.395	-0.511	0.0766
LOC_Os05g49130.2	16S rRNA processing protein RimM containing protein, expressed	0.00376542	4.98e-05	0.000103385	0.413	0.0272	0.019	-0.705	-1.31	-1.19	-0.0944	0.505	-0.8	0.389
LOC_Os05g49180.1	protein of unknown function DUF1296 domain containing protein, expressed	5.45e-07	1.05e-07	0.00146768	1.38e-05	5.78e-08	0.188	1.31	1.58	0.479	-0.467	-0.737	0.841	0.362
LOC_Os05g49230.1	ribosomal RNA large subunit methyltransferase J, putative, expressed	3.89e-06	3.13e-08	0.00341756	0.00105	2.43e-10	0.297	1.06	1.84	0.425	-0.227	-1.01	0.83	0.404
LOC_Os05g49610.1	ubiquitin carboxyl-terminal hydrolase, family 1, putative, expressed	0.00103006	1.24e-06	0.000806384	0.244	9.14e-05	0.128	-0.731	-1.72	-0.757	-0.0715	0.918	-0.802	-0.0446
LOC_Os05g51540.1	expressed protein	2.47e-07	2.07e-08	6.1e-06	1.29e-06	2.68e-11	0.0002	2.71	3.58	1.86	-0.67	-1.54	2.04	0.174
LOC_Os05g51700.1	nucleoside diphosphate kinase, putative, expressed	0.00228161	0.00127545	9.76e-05	0.347	0.257	0.0179	-0.737	-0.806	-1.15	0.0629	0.132	-0.674	0.479
LOC_Os06g01390.1	acyl-coenzyme A oxidase 1.2, peroxisomal, putative, expressed	0.000272679	6.26e-05	0.0397949	0.109	0.0339	0.659	0.489	0.593	0.205	-0.167	-0.271	0.322	0.117
LOC_Os06g01630.6	2-oxo acid dehydrogenases acyltransferase domain containing protein, expressed	0.000125453	9.55e-05	2.27e-05	0.0629	0.0494	0.00231	-0.822	-0.852	-1.02	0.148	0.178	-0.674	0.348
LOC_Os06g01700.1	CWC15 homolog A, putative, expressed	0.000206464	5.7e-07	0.037341	0.0907	1.31e-05	0.652	0.685	1.41	0.282	-0.0916	-0.815	0.594	0.312
LOC_Os06g02510.3	ribosomal protein L13, putative, expressed	5.51e-06	6.37e-06	0.00310705	0.00187	0.00206	0.282	0.967	0.95	0.412	-0.385	-0.368	0.582	0.17
LOC_Os06g03530.1	pentatricopeptide, putative, expressed	0.000200221	7.69e-05	0.818311	0.0888	0.0408	0.883	-2.67	-3.02	0.106	1.27	1.63	-1.4	-1.5
LOC_Os06g03640.1	BAG domain containing protein, expressed	0.0334176	0.00253521	0.000145102	0.655	0.344	0.0281	1.86	3.05	4.61	0.523	-0.673	2.38	-2.23
LOC_Os06g03860.1	uncharacterized membrane protein, putative, expressed	1.2e-05	4.11e-06	0.0074734	0.00592	0.00101	0.423	0.772	0.877	0.31	-0.282	-0.388	0.49	0.18
LOC_Os06g03920.1	expressed protein	0.00201713	9.38e-06	0.615029	0.331	0.00375	0.869	0.704	1.45	0.086	-0.145	-0.887	0.559	0.473
LOC_Os06g04270.1	transketolase, chloroplast precursor, putative, expressed	4.5e-06	5e-07	9.96e-06	0.00133	9.12e-06	0.000563	-1.12	-1.45	-1.02	0.224	0.552	-0.899	0.122
LOC_Os06g04600.2	Brix domain containing protein, putative, expressed	5.1e-05	0.000265161	0.209276	0.0303	0.107	0.807	1.52	1.23	0.29	-0.763	-0.467	0.76	0.47
LOC_Os06g05660.1	NAP domain containing protein, putative, expressed	4.78e-06	5.84e-07	0.0536149	0.00146	1.39e-05	0.692	-2.91	-3.72	-0.679	1.08	1.89	-1.83	-1.15
LOC_Os06g05660.3	NAP domain containing protein, putative, expressed	1.07e-05	1.29e-06	0.00712266	0.00514	9.88e-05	0.416	-1.14	-1.46	-0.454	0.373	0.697	-0.762	-0.308
LOC_Os06g05720.1	expressed protein	0.0124388	8.23e-05	0.000233899	0.558	0.0433	0.0455	0.929	2	1.74	0.24	-0.833	1.17	-0.575
LOC_Os06g05740.1	expressed protein	5.93e-07	4.83e-06	1.44e-06	1.73e-05	0.00133	4.67e-06	5.36	4.19	4.83	-1.76	-0.597	3.6	-1.24
LOC_Os06g07350.1	RNA-binding motif protein, putative, expressed	0.332422	1.2e-05	0.00599137	0.809	0.00523	0.388	0.114	0.948	-0.396	0.0523	-0.781	0.166	0.563
LOC_Os06g07780.2	vesicle-associated membrane protein, putative, expressed	1.93e-06	2.5e-07	0.000354882	0.000271	1.16e-06	0.0667	0.89	1.13	0.463	-0.27	-0.506	0.62	0.156
LOC_Os06g08480.1	CHD3-type chromatin-remodeling factor PICKLE, putative, expressed	0.0260381	8.49e-06	0.000138413	0.633	0.00324	0.0267	-0.276	-0.923	-0.651	-0.186	0.461	-0.463	0.188
LOC_Os06g09290.1	26S protease regulatory subunit 7, putative, expressed	0.0450114	8.81e-05	0.0330846	0.68	0.046	0.637	-0.234	-0.667	-0.252	-0.0546	0.379	-0.288	-0.0359
LOC_Os06g09688.1	chaperonin, putative, expressed	0.000231689	0.000947758	0.000157071	0.098	0.222	0.0306	-1.79	-1.46	-1.88	0.503	0.181	-1.28	0.598
LOC_Os06g10430.3	protein of unknown function DUF1296 domain containing protein, expressed	3.99e-06	2.06e-06	0.00432947	0.00109	0.000267	0.335	1.2	1.3	0.467	-0.461	-0.559	0.743	0.276
LOC_Os06g11170.2	formin-binding protein-related, putative, expressed	0.000652526	1.26e-06	0.00865913	0.19	9.45e-05	0.447	1.29	2.83	0.848	-0.046	-1.59	1.24	0.394
LOC_Os06g11430.1	GRAM domain containing protein, expressed	3.5e-05	0.983303	0.632358	0.0212	0.849	0.87	-3.36	0.00972	-0.224	2.47	-0.904	-0.894	-0.671
LOC_Os06g11620.1	RNA recognition motif containing protein, putative, expressed	5e-07	1.88e-06	0.000137803	1.1e-05	0.000221	0.0266	-1.85	-1.58	-0.934	0.755	0.493	-1.09	-0.157
LOC_Os06g12260.1	N-rich protein, putative, expressed	1.62e-06	2.31e-08	0.138722	0.000189	4.81e-11	0.777	1.02	1.66	0.154	-0.314	-0.949	0.708	0.554
LOC_Os06g12530.1	CS domain containing protein, putative, expressed	1.85e-06	5.79e-09	3.75e-05	0.000251	2.01e-14	0.00517	1.54	2.97	1.07	-0.147	-1.57	1.4	0.322
LOC_Os06g13820.1	dynamin, putative, expressed	4.05e-05	5.72e-06	0.0352219	0.0245	0.00175	0.645	0.595	0.756	0.201	-0.207	-0.368	0.388	0.187
LOC_Os06g16290.1	ribosomal protein L7Ae, putative, expressed	4.87e-05	1.65e-06	0.0147219	0.029	0.000168	0.529	0.971	1.46	0.407	-0.261	-0.752	0.71	0.303
LOC_Os06g17840.1	expressed protein	6.33e-06	6.14e-06	0.00172408	0.00234	0.00195	0.205	0.909	0.912	0.433	-0.346	-0.349	0.564	0.131
LOC_Os06g19480.1	expressed protein	3.33e-06	1.2e-06	1.81e-05	0.0008	8.47e-05	0.00162	1.98	2.23	1.61	-0.523	-0.774	1.46	-0.159
LOC_Os06g19660.2	WD domain, G-beta repeat domain containing protein, expressed	6.27e-07	5.65e-05	0.177865	2.01e-05	0.0309	0.795	-1.36	-0.791	-0.165	0.779	0.213	-0.578	-0.414
LOC_Os06g20150.1	peroxidase precursor, putative, expressed	4.72e-05	9.08e-06	0.000826171	0.0283	0.00358	0.13	-1.21	-1.48	-0.821	0.331	0.603	-0.877	-0.056
LOC_Os06g20370.1	microtubule associated protein, putative, expressed	1.6e-07	7.8e-08	6.64e-06	2.88e-07	1.76e-08	0.000241	1.3	1.41	0.845	-0.412	-0.523	0.89	0.0449
LOC_Os06g20390.1	expressed protein	0.00013043	1.75e-05	1.64e-07	0.0648	0.00843	8.39e-10	0.874	1.13	1.95	0.113	-0.14	0.987	-0.961
LOC_Os06g22650.1	VHS and GAT domain containing protein, expressed	0.000653113	1.07e-05	0.680676	0.19	0.00448	0.874	0.651	1.11	-0.0549	-0.224	-0.685	0.427	0.482
LOC_Os06g22820.1	cyclin-dependent kinase F-1, putative, expressed	5.93e-05	0.781611	0.00893947	0.0343	0.837	0.452	-2.4	-0.0982	1.14	2.06	-0.241	-0.34	-1.48
LOC_Os06g23430.2	signal recognition particle 19 kDa protein, putative, expressed	1.1e-05	5.82e-06	0.0288556	0.0053	0.0018	0.62	1.24	1.33	0.373	-0.501	-0.599	0.736	0.363
LOC_Os06g24870.3	bromodomain domain containing protein, expressed	0.00013519	9.18e-07	0.0469986	0.0665	4.45e-05	0.678	1.28	2.36	0.47	-0.255	-1.33	1.03	0.559
LOC_Os06g30310.1	alpha-glucan water dikinase, chloroplast precursor, putative, expressed	8.01e-05	4.16e-05	0.0745415	0.044	0.0227	0.724	0.8	0.87	0.24	-0.323	-0.392	0.478	0.237
LOC_Os06g34690.1	T-complex protein, putative, expressed	0.553614	1.72e-05	0.000100501	0.834	0.0083	0.0185	0.0515	0.681	0.545	0.268	-0.361	0.319	-0.226
LOC_Os06g35030.1	RNA recognition motif containing protein, putative, expressed	6.52e-05	7.92e-06	0.105657	0.0371	0.00292	0.755	-2.09	-2.71	0.544	1.02	1.65	-1.06	-1.61
LOC_Os06g35470.1	L1P family of ribosomal proteins domain containing protein, expressed	1.26e-06	2.47e-07	0.000447489	0.000114	1.11e-06	0.0814	1.41	1.7	0.677	-0.464	-0.755	0.948	0.271
LOC_Os06g35650.1	reticuline oxidase-like protein precursor, putative, expressed	7.56e-06	7.11e-05	0.0119835	0.00309	0.0381	0.498	-1.08	-0.819	-0.376	0.512	0.25	-0.569	-0.193
LOC_Os06g36700.1	T-complex protein, putative, expressed	4.83e-05	3.41e-05	0.000191012	0.0289	0.0184	0.0373	0.619	0.646	0.518	-0.173	-0.201	0.446	-0.0719
LOC_Os06g39700.1	DNA-directed RNA polymerase subunit alpha, putative, expressed	0.00133983	0.000406145	5.74e-05	0.277	0.139	0.00964	-0.726	-0.864	-1.12	0.0489	0.186	-0.677	0.442
LOC_Os06g39760.1	WD domain, G-beta repeat domain containing protein, expressed	3.09e-05	0.00168082	0.0538617	0.0185	0.292	0.692	-1.16	-0.674	-0.34	0.619	0.13	-0.544	-0.204
LOC_Os06g40040.1	protein of unknown function domain containing protein, expressed	1.33e-05	4.31e-07	2.29e-05	0.00674	5.96e-06	0.00234	-1.05	-1.58	-0.985	0.15	0.673	-0.904	0.0816
LOC_Os06g40190.1	phospholipase D, putative, expressed	1.05e-06	0.0853275	0.00110068	7.56e-05	0.709	0.158	-1.89	-0.321	0.778	1.53	-0.0365	-0.357	-1.13
LOC_Os06g40450.3	targeting protein for Xklp2, putative, expressed	3.85e-06	8.93e-07	0.00157772	0.00103	4.16e-05	0.196	1.26	1.5	0.573	-0.428	-0.663	0.832	0.259
LOC_Os06g40600.1	elongation factor, putative, expressed	0.120622	2.31e-05	0.687534	0.751	0.0117	0.874	0.155	0.708	0.0375	0.0705	-0.483	0.225	0.188
LOC_Os06g40640.3	fructose-bisphospate aldolase isozyme, putative, expressed	2.39e-10	0.00131251	0.00432406	3.25e-14	0.261	0.335	-3.01	-0.473	0.391	2.24	-0.301	-0.774	-1.16
LOC_Os06g43560.1	phox domain-containing protein, putative, expressed	0.000523847	1.81e-05	0.00154504	0.166	0.00881	0.193	1.71	2.66	1.46	-0.255	-1.2	1.46	-0.00279
LOC_Os06g43760.1	tRNA synthetase class I, putative, expressed	0.0594964	4.3e-05	0.921444	0.702	0.0235	0.889	-0.195	-0.658	0.00919	-0.016	0.447	-0.211	-0.22
LOC_Os06g44890.1	villin protein, putative, expressed	4.28e-06	1.71e-05	0.000314852	0.00122	0.0082	0.06	2.34	1.98	1.36	-0.92	-0.561	1.42	0.0599
LOC_Os06g45390.1	expressed protein	0.000455453	2.86e-05	0.000320534	0.151	0.015	0.061	-1.06	-1.53	-1.12	0.136	0.601	-0.926	0.189
LOC_Os06g45820.1	OsFtsH2 FtsH protease, homologue of AtFtsH2/8, expressed	9.88e-05	1.59e-06	4.84e-05	0.0525	0.000157	0.00763	-0.623	-1.03	-0.683	0.0388	0.447	-0.585	0.0985
LOC_Os06g45990.2	patellin-5, putative, expressed	2.18e-05	0.00080292	0.00860786	0.0123	0.203	0.446	0.852	0.529	0.359	-0.417	-0.0935	0.435	0.076
LOC_Os06g46930.1	ribosomal protein L24, putative, expressed	0.000285313	5.68e-05	0.0850833	0.112	0.031	0.736	1.01	1.25	0.344	-0.359	-0.599	0.651	0.307
LOC_Os06g48530.1	ZOS6-09 - C2H2 zinc finger protein, expressed	0.0804019	3.31e-05	0.000525939	0.724	0.0178	0.0926	0.2	0.764	-0.53	-0.0917	-0.656	0.109	0.639
LOC_Os06g48750.1	DEAD-box ATP-dependent RNA helicase, putative, expressed	2.78e-05	8.71e-05	0.137982	0.0164	0.0456	0.777	-0.649	-0.562	-0.138	0.312	0.225	-0.337	-0.199
LOC_Os06g49120.1	Complex I intermediate-associated protein 30 domain containing protein, putative, expressed	1.71e-05	8.05e-06	1.63e-05	0.00921	0.00299	0.00136	-0.819	-0.897	-0.823	0.184	0.262	-0.635	0.189
LOC_Os06g50170.1	BRE, putative, expressed	5.9e-09	3.61e-09	3.52e-06	3.25e-14	2.01e-14	5.18e-05	5.21	5.5	2.52	-1.9	-2.19	3.31	0.789
LOC_Os06g50890.1	RNA recognition motif containing protein, expressed	0.0114742	6.84e-05	5.66e-05	0.549	0.0368	0.00946	-0.344	-0.747	-0.765	-0.12	0.283	-0.464	0.301
LOC_Os06g51084.8	1,4-alpha-glucan-branching enzyme, chloroplast precursor, putative, expressed	0.000653691	0.000213062	2.24e-05	0.19	0.0925	0.00227	0.971	1.13	1.51	-0.0658	-0.229	0.905	-0.61
LOC_Os06g51250.1	EF hand family protein, putative, expressed	8.97e-05	0.00747197	0.367641	0.0485	0.479	0.841	-0.753	0.389	-0.108	0.635	-0.507	-0.118	-0.00996
LOC_Os07g01920.1	nucleolar GTP-binding protein 1, putative, expressed	0.000345647	1.24e-06	0.205065	0.127	9.04e-05	0.805	0.837	1.69	0.207	-0.154	-1	0.683	0.476
LOC_Os07g02100.1	flavin-containing monooxygenase family protein, putative, expressed	5.68e-05	9.62e-06	0.0505748	0.0331	0.00389	0.685	-2.13	-2.65	0.684	1.11	1.63	-1.03	-1.71
LOC_Os07g02340.1	expressed protein	0.000310482	0.000280074	0.000153109	0.118	0.111	0.0298	1.16	1.17	1.27	-0.256	-0.273	0.901	-0.372
LOC_Os07g02350.1	casein kinase II subunit alpha-2, putative, expressed	8.47e-07	2.22e-07	7.91e-07	4.47e-05	7.95e-07	6.49e-07	1.56	1.81	1.57	-0.321	-0.58	1.23	-0.334
LOC_Os07g04550.1	pleckstrin homology domain-containing protein, putative, expressed	4.14e-06	5.05e-07	0.000107121	0.00116	9.32e-06	0.0198	1.51	1.93	1.01	-0.398	-0.817	1.11	0.102
LOC_Os07g05470.1	AIR9 protein, putative, expressed	6.11e-11	2.33e-11	6.5e-10	3.25e-14	2.01e-14	1.82e-13	3.03	3.36	2.33	-0.846	-1.18	2.18	-0.153
LOC_Os07g05820.2	hydroxyacid oxidase 1, putative, expressed	1.13e-05	0.000109376	0.0270274	0.00547	0.0555	0.612	0.767	0.577	0.235	-0.372	-0.182	0.395	0.159
LOC_Os07g07040.1	erythrocyte binding protein 3, putative, expressed	2.94e-08	1.91e-09	2.5e-05	1.81e-10	2.01e-14	0.0027	1.89	2.57	0.864	-0.563	-1.24	1.33	0.467
LOC_Os07g07310.1	polynucleotide phosphorylase, putative, expressed	0.000789756	3.28e-05	3.66e-05	0.212	0.0176	0.00499	-0.723	-1.11	-1.09	-0.00682	0.376	-0.73	0.361
LOC_Os07g08710.1	AT hook-containing DNA-binding protein, putative, expressed	3.08e-07	1.51e-09	3.69e-05	2.67e-06	2.01e-14	0.00504	1.37	2.49	0.778	-0.213	-1.33	1.16	0.382
LOC_Os07g09510.1	retrotransposon protein, putative, unclassified, expressed	0.0043816	3.31e-05	0.757476	0.433	0.0178	0.879	0.842	1.68	0.0714	-0.193	-1.03	0.649	0.577
LOC_Os07g10350.1	S1 RNA binding domain containing protein, expressed	2.09e-05	1.36e-05	4.52e-05	0.0117	0.00619	0.0069	1.45	1.53	1.32	-0.377	-0.456	1.08	-0.244
LOC_Os07g11410.1	RAL5 - Seed allergenic protein RA5/RA14/RA17 precursor, expressed	0.000148908	9.68e-05	0.00519839	0.0716	0.05	0.365	1.41	1.49	0.829	-0.476	-0.558	0.931	0.102
LOC_Os07g12320.1	WD domain, G-beta repeat domain containing protein, expressed	4.96e-06	8.71e-06	0.00794691	0.00156	0.00336	0.433	1.45	1.35	0.517	-0.618	-0.524	0.83	0.312
LOC_Os07g12830.2	cytochrome b5-like Heme/Steroid binding domain containing protein, expressed	6.45e-05	0.177438	0.500651	0.0368	0.757	0.858	5.01	1.06	0.509	-3.36	0.583	1.64	1.13
LOC_Os07g18720.1	tetratricopeptide repeat containing protein, putative, expressed	6.06e-05	2.97e-05	0.030547	0.0349	0.0157	0.628	0.855	0.935	0.314	-0.329	-0.409	0.526	0.212
LOC_Os07g19190.1	ribosomal protein L24, putative, expressed	7.73e-05	4.86e-06	0.110217	0.0427	0.00134	0.759	1.13	1.59	0.296	-0.376	-0.834	0.753	0.457
LOC_Os07g22640.1	lipid binding protein, putative, expressed	6.99e-08	1.71e-08	7.61e-06	1.14e-08	9e-12	0.000322	1.46	1.71	0.848	-0.455	-0.704	1	0.156
LOC_Os07g25440.2	WD domain, G-beta repeat domain containing protein, expressed	3.9e-07	9.78e-08	0.00116429	5.45e-06	4.45e-08	0.164	1.36	1.59	0.495	-0.496	-0.727	0.859	0.365
LOC_Os07g28940.1	ATGRIP/GRIP, putative, expressed	0.000177011	1.44e-05	0.696485	0.0814	0.00668	0.875	-3.22	-4.43	0.215	1.36	2.57	-1.86	-2.07
LOC_Os07g29320.1	rRNA-processing protein EBP2, putative, expressed	4.55e-05	0.000291531	0.00933287	0.0273	0.114	0.459	0.679	0.532	0.309	-0.299	-0.152	0.38	0.0712
LOC_Os07g30220.1	expressed protein	0.00998917	4.22e-07	3.01e-06	0.533	5.63e-06	3.53e-05	0.716	2.79	2.22	0.715	-1.36	1.43	-0.789
LOC_Os07g31280.3	casein kinase II subunit beta-4, putative, expressed	0.00118075	2.28e-06	0.00177007	0.261	0.000328	0.208	0.818	1.83	0.769	0.0365	-0.977	0.855	0.0856
LOC_Os07g31340.1	regulator of nonsense transcripts 1, putative, expressed	1.73e-07	1.44e-07	3.76e-05	3.73e-07	1.89e-07	0.00519	-1.16	-1.18	-0.614	0.42	0.444	-0.739	-0.125
LOC_Os07g32380.1	protein phosphatase 2C, putative, expressed	2.84e-07	0.0204186	0.881793	2.06e-06	0.588	0.887	-2.8	-0.595	0.0325	1.96	-0.246	-0.842	-0.874
LOC_Os07g32460.1	src homology-3 domain protein 3, putative, expressed	1.03e-06	2.98e-07	7.78e-06	7.27e-05	2e-06	0.000338	1.22	1.41	0.962	-0.323	-0.51	0.897	-0.0643
LOC_Os07g33630.1	HEAT repeat family protein, putative, expressed	0.0310844	5.61e-06	0.0139884	0.649	0.00169	0.521	0.378	1.38	0.45	0.175	-0.831	0.553	0.103
LOC_Os07g34570.1	FAD dependent oxidoreductase domain containing protein, expressed	0.000371727	9.92e-05	0.000156513	0.132	0.051	0.0305	-0.588	-0.702	-0.661	0.1	0.214	-0.488	0.173
LOC_Os07g34640.2	pyruvate Pi dikinase regulatory protein, putative, expressed	0.00291735	0.0168075	1.35e-05	0.38	0.569	0.00099	-0.437	-0.317	-0.912	0.0206	-0.0992	-0.417	0.495
LOC_Os07g35600.2	expressed protein	4.55e-06	2.85e-07	3.51e-05	0.00135	1.74e-06	0.00467	3.89	5.36	3.03	-0.817	-2.29	3.07	0.039
LOC_Os07g36940.2	eukaryotic translation initiation factor 4G, putative, expressed	6.84e-05	0.00195556	0.760577	0.0387	0.311	0.879	-0.811	0.508	0.0372	0.745	-0.574	-0.0666	-0.104
LOC_Os07g37030.1	cytochrome b6-f complex iron-sulfur subunit, chloroplast precursor, putative, expressed	1.66e-05	0.00034417	0.0013343	0.00891	0.126	0.178	0.909	0.615	0.506	-0.402	-0.107	0.508	0.0018
LOC_Os07g37140.1	expressed protein	1.42e-05	6.7e-07	0.000143437	0.00735	1.98e-05	0.0278	-0.858	-1.23	-0.64	0.175	0.548	-0.682	-0.0417
LOC_Os07g37270.1	MSP domain containing protein, putative, expressed	5.32e-05	5.46e-05	0.000525945	0.0314	0.0298	0.0926	0.601	0.599	0.443	-0.19	-0.188	0.411	-0.032
LOC_Os07g37830.2	peptidyl-prolyl cis-trans isomerase CYP37, chloroplast precursor, putative, expressed	0.017653	0.000339907	0.000143258	0.595	0.125	0.0278	-0.461	-0.884	-0.994	-0.123	0.3	-0.585	0.409
LOC_Os07g38430.1	WD domain, G-beta repeat domain containing protein, expressed	5.41e-05	3.81e-06	0.00029084	0.0318	0.00088	0.0559	1.67	2.31	1.34	-0.341	-0.982	1.33	-0.00919
LOC_Os07g38490.1	GDP-fucose protein-O-fucosyltransferase 2, putative, expressed	0.00238476	1.38e-05	0.0519383	0.353	0.0063	0.688	-0.941	-1.9	-0.507	0.105	1.06	-0.836	-0.329
LOC_Os07g38580.1	zinc finger family protein, putative, expressed	4.54e-05	0.0223699	0.00138437	0.0273	0.597	0.182	-2.48	0.944	1.55	2.49	-0.94	0.00429	-1.55
LOC_Os07g39620.2	C2 domain containing protein, putative, expressed	6.02e-05	0.00240633	0.000878271	0.0347	0.337	0.136	-1.66	0.986	1.15	1.78	-0.866	0.12	-1.03
LOC_Os07g40620.1	saccharopine dehydrogenase, putative, expressed	0.0052318	6.95e-05	0.318383	0.455	0.0373	0.833	0.388	0.727	0.112	-0.0808	-0.421	0.307	0.194
LOC_Os07g40930.1	WD repeat-containing protein 12, putative, expressed	9.85e-05	9.46e-05	0.000597082	0.0523	0.049	0.102	2.85	2.86	2.23	-0.863	-0.878	1.99	-0.245
LOC_Os07g43900.1	protein kinase domain containing protein, expressed	2.02e-06	0.101295	0.0156349	0.000299	0.721	0.537	-2.03	-0.351	0.571	1.57	-0.1	-0.452	-1.02
LOC_Os07g44190.1	h/ACA ribonucleoprotein complex subunit 4, putative, expressed	1.46e-06	1.03e-07	8.07e-05	0.000154	5.37e-08	0.0145	1.14	1.55	0.701	-0.294	-0.7	0.848	0.147
LOC_Os07g44350.1	sec20 domain containing protein, expressed	3.94e-05	1.44e-07	0.000116347	0.0238	1.87e-07	0.0219	0.691	1.34	0.602	-0.0327	-0.682	0.658	0.0568
LOC_Os07g44550.1	peroxidase precursor, putative, expressed	1.29e-07	1.07e-07	6.6e-05	1.32e-07	6.23e-08	0.0115	-1.3	-1.32	-0.618	0.487	0.514	-0.809	-0.192
LOC_Os07g44970.1	XPA-binding protein 2, putative, expressed	4.73e-05	1.26e-07	0.470481	0.0283	1.18e-07	0.855	0.728	1.47	0.0764	-0.16	-0.898	0.568	0.491
LOC_Os07g46410.1	bifunctional thioredoxin reductase/thioredoxin, putative, expressed	0.000131075	5.65e-05	0.00389305	0.065	0.0308	0.318	-1.98	-2.2	-1.2	0.631	0.858	-1.35	-0.143
LOC_Os07g46460.1	ferredoxin-dependent glutamate synthase, chloroplast precursor, putative, expressed	2.76e-06	1.11e-07	3.21e-06	0.000561	7.35e-08	4.17e-05	-1.12	-1.63	-1.1	0.16	0.663	-0.964	0.14
LOC_Os07g46590.1	SNF2 family N-terminal domain containing protein, expressed	0.000119206	2.25e-05	0.00520787	0.0606	0.0113	0.365	0.895	1.11	0.512	-0.267	-0.477	0.628	0.116
LOC_Os07g46790.1	4-alpha-glucanotransferase, putative, expressed	5.14e-05	0.000922555	0.0400152	0.0305	0.219	0.66	-1.3	-0.881	-0.439	0.647	0.225	-0.656	-0.217
LOC_Os07g47180.1	transposon protein, putative, unclassified, expressed	1.7e-05	1.03e-05	7.36e-05	0.00915	0.00428	0.013	1.28	1.36	1.07	-0.354	-0.435	0.928	-0.139
LOC_Os07g47340.1	expressed protein	3.26e-05	2.73e-07	0.00415548	0.0197	1.54e-06	0.328	3.46	6.09	1.74	-0.636	-3.27	2.82	1.08
LOC_Os07g47420.1	60S ribosome subunit biogenesis protein NIP7, putative, expressed	5.51e-08	1.18e-07	0.000121262	4.06e-09	9.14e-08	0.023	2.23	2.04	0.892	-0.936	-0.753	1.29	0.399
LOC_Os07g47630.1	RNA recognition motif containing protein, expressed	6.24e-08	5.94e-08	5.23e-09	6.99e-09	5.53e-09	1.82e-13	-1.82	-1.83	-2.4	0.308	0.318	-1.51	0.889
LOC_Os07g48780.1	OsCam1-2 - Calmodulin, expressed	4.4e-05	0.00869019	0.000170587	0.0265	0.496	0.0333	-0.713	-0.327	-0.598	0.303	-0.0824	-0.41	0.189
LOC_Os08g01054.2	retrotransposon protein, putative, unclassified, expressed	5.97e-05	4.45e-05	0.00164715	0.0345	0.0243	0.2	2.43	2.52	1.53	-0.807	-0.899	1.62	0.0869
LOC_Os08g01620.2	shwachman-Bodian-Diamond syndrome protein, putative, expressed	3.33e-05	6.02e-06	0.00141073	0.0201	0.00189	0.184	1.03	1.27	0.621	-0.301	-0.541	0.731	0.111
LOC_Os08g02130.2	RNA recognition motif containing protein, putative, expressed	1.24e-08	3.9e-09	1.01e-06	1.23e-12	2.01e-14	1.55e-06	-1.78	-2.02	-1.08	0.558	0.802	-1.22	-0.14
LOC_Os08g02690.1	MA3 domain containing protein, expressed	1.5e-07	0.00462951	0.208638	2.28e-07	0.42	0.806	-1.45	-0.38	-0.138	0.957	-0.112	-0.492	-0.353
LOC_Os08g02700.1	fructose-bisphospate aldolase isozyme, putative, expressed	0.0400823	0.000205557	1.08e-05	0.671	0.0902	0.000653	-0.249	0.616	0.896	0.565	-0.301	0.316	-0.58
LOC_Os08g03290.1	glyceraldehyde-3-phosphate dehydrogenase, putative, expressed	3.75e-07	3.87e-05	3.32e-06	4.83e-06	0.021	4.53e-05	1.55	0.893	1.2	-0.638	0.0184	0.911	-0.291
LOC_Os08g04920.8	OsDegp11 - Putative Deg protease homologue, expressed	2.42e-07	1.92e-07	0.000140803	1.21e-06	4.92e-07	0.0272	2.63	2.7	1.22	-0.991	-1.06	1.64	0.416
LOC_Os08g05840.1	DNA topoisomerase 1, putative, expressed	7.27e-09	4.68e-10	7.02e-07	3.25e-14	2.01e-14	4.25e-07	1.76	2.39	1.05	-0.463	-1.09	1.3	0.248
LOC_Os08g05880.1	Brix domain containing protein, putative, expressed	1.97e-08	2.14e-09	7.39e-07	2.07e-11	2.01e-14	5.07e-07	1.74	2.23	1.15	-0.46	-0.947	1.28	0.126
LOC_Os08g05910.2	peptide transporter PTR2, putative, expressed	0.361336	0.375388	7.08e-05	0.813	0.8	0.0125	0.533	-0.517	3.78	0.416	1.47	0.949	-2.83
LOC_Os08g06344.3	transposon protein, putative, CACTA, En/Spm sub-class, expressed	0.00420623	5.95e-06	0.217064	0.428	0.00186	0.809	0.435	1.06	0.153	-0.022	-0.652	0.413	0.26
LOC_Os08g06360.1	THO complex subunit 7, putative, expressed	1.79e-06	3.99e-06	0.000178219	0.000235	0.000957	0.0349	1.2	1.09	0.681	-0.457	-0.349	0.744	0.063
LOC_Os08g06460.1	dnaJ domain containing protein, expressed	0.000358791	4.35e-06	0.000230499	0.13	0.00111	0.0449	1.63	2.85	1.73	-0.0773	-1.3	1.55	-0.179
LOC_Os08g08080.2	BUD13, putative, expressed	0.90542	0.0761588	7.3e-06	0.858	0.701	0.000294	-0.0283	0.463	-2.09	-0.386	-0.877	-0.414	1.68
LOC_Os08g08830.1	expressed protein	1.29e-05	0.165113	0.01129	0.0065	0.753	0.489	-3.3	-0.591	1.24	2.64	-0.0723	-0.664	-1.9
LOC_Os08g09100.1	RNA recognition motif containing protein, putative, expressed	0.000101639	4.71e-05	0.997625	0.0537	0.0258	0.893	-2.99	-3.3	0.00141	1.42	1.73	-1.57	-1.57
LOC_Os08g12760.4	YT521-B, putative, expressed	1.24e-06	3.85e-05	2.22e-06	0.00011	0.0209	1.61e-05	-1.66	1.1	1.55	1.91	-0.853	0.248	-1.31
LOC_Os08g12840.1	FabA-like domain containing protein, expressed	9.35e-06	1.91e-05	0.00107167	0.00423	0.00942	0.155	1.01	0.928	0.543	-0.392	-0.307	0.621	0.0781
LOC_Os08g13350.1	expressed protein	0.000183739	2.23e-05	0.425759	0.0836	0.0112	0.85	1.11	1.45	0.154	-0.43	-0.773	0.678	0.525
LOC_Os08g13440.3	cupin domain containing protein, expressed	2.15e-05	1.71e-06	0.0208168	0.0121	0.000181	0.578	-2.2	-2.98	-0.775	0.712	1.49	-1.49	-0.714
LOC_Os08g13840.2	WRKY25, expressed	3.72e-05	2.37e-05	0.000396722	0.0225	0.012	0.0735	-1.73	-1.82	-1.26	0.522	0.621	-1.2	0.0605
LOC_Os08g14440.2	uridylyltransferase-related, putative, expressed	3.44e-05	5e-05	0.000114832	0.0208	0.0273	0.0215	-1.19	-1.13	-1.02	0.352	0.298	-0.833	0.183
LOC_Os08g22864.1	sec8 exocyst complex component specific domain containing protein, expressed	1.15e-07	3e-08	6.36e-06	8.63e-08	1.97e-10	0.000219	1.55	1.8	0.975	-0.469	-0.722	1.08	0.108
LOC_Os08g23360.1	signal recognition particle 68 kDa protein, putative, expressed	5.02e-08	2.22e-09	5.45e-07	2.67e-09	2.01e-14	1.75e-07	-1.41	-2	-1.08	0.291	0.878	-1.12	-0.045
LOC_Os08g23430.1	starch binding domain containing protein, putative, expressed	0.000931092	1.92e-06	0.00119326	0.231	0.000231	0.166	-0.853	-1.88	-0.822	-0.036	0.992	-0.889	-0.0669
LOC_Os08g23710.1	ribosomal protein L7Ae, putative, expressed	5.22e-05	6.52e-06	0.000275941	0.0309	0.00214	0.0532	-0.793	-1.02	-0.638	0.179	0.411	-0.614	0.0238
LOC_Os08g25460.1	transcription initiation factor, putative, expressed	0.000253806	1.3e-06	1.15e-05	0.104	0.000102	0.000736	0.623	1.2	0.925	0.0629	-0.511	0.686	-0.239
LOC_Os08g27850.1	endothelial differentiation-related factor 1, putative, expressed	1.42e-06	2.54e-06	2.97e-05	0.000145	0.000405	0.00353	1.62	1.51	1.12	-0.555	-0.449	1.06	-0.0604
LOC_Os08g28690.1	expressed protein	8.18e-09	4.09e-10	0.00235087	6.27e-14	2.01e-14	0.243	2.45	3.42	0.52	-0.856	-1.82	1.6	1.08
LOC_Os08g29650.1	RNA recognition motif containing protein, expressed	4.22e-08	6.5e-08	5.69e-08	1.16e-09	8.13e-09	1.97e-12	-1.76	-1.67	-1.7	0.474	0.391	-1.28	0.416
LOC_Os08g30060.2	proton pump interactor, putative, expressed	1.31e-07	3.59e-08	2.33e-06	1.41e-07	4.99e-10	1.82e-05	1.35	1.56	0.971	-0.381	-0.593	0.972	0.00109
LOC_Os08g32090.1	DEAD-box ATP-dependent RNA helicase, putative, expressed	1.87e-05	3.33e-06	0.00495037	0.0102	0.000689	0.357	0.873	1.07	0.398	-0.287	-0.488	0.586	0.188
LOC_Os08g32100.1	transposon protein, putative, CACTA, En/Spm sub-class, expressed	6.57e-05	5.92e-09	0.0013077	0.0374	2.01e-14	0.176	1.04	3.08	0.689	0.162	-1.88	1.2	0.513
LOC_Os08g32690.1	expressed protein	1.71e-07	8.35e-10	0.000190386	3.62e-07	2.01e-14	0.0372	1.42	2.57	0.608	-0.269	-1.42	1.15	0.54
LOC_Os08g32850.1	methylcrotonoyl-CoA carboxylase beta chain, mitochondrial precursor, putative, expressed	1.08e-10	3.53e-09	2.02e-05	3.25e-14	2.01e-14	0.00193	3.33	2.27	0.839	-1.72	-0.658	1.61	0.77
LOC_Os08g33120.1	RNA recognition motif containing protein, putative, expressed	2.81e-06	8.12e-07	0.883813	0.000583	3.26e-05	0.887	1.31	1.51	0.0195	-0.599	-0.803	0.711	0.691
LOC_Os08g33190.1	linker histone H1 and H5 family protein, expressed	0.0146426	0.976849	8.48e-05	0.576	0.849	0.0153	-0.423	0.00421	-0.938	0.0837	-0.344	-0.339	0.599
LOC_Os08g33370.2	14-3-3 protein, putative, expressed	0.000121306	4.89e-05	0.00531685	0.0614	0.0267	0.368	-0.586	-0.659	-0.335	0.191	0.264	-0.395	-0.0601
LOC_Os08g33440.1	2-oxo acid dehydrogenases acyltransferase domain containing protein, expressed	0.000118531	5.48e-05	1.98e-05	0.0603	0.0299	0.00187	0.542	0.599	-0.681	-0.427	-0.484	0.115	0.796
LOC_Os08g35740.1	12-oxophytodienoate reductase, putative, expressed	4.64e-05	1.5e-05	0.000157761	0.0279	0.00701	0.0307	-0.684	-0.787	-0.584	0.17	0.273	-0.514	0.0702
LOC_Os08g36450.1	transcription regulator, putative, expressed	0.000267372	1.56e-05	0.000238697	0.108	0.00739	0.0464	-0.734	-1.06	-0.746	0.1	0.423	-0.634	0.111
LOC_Os08g37444.4	signal recognition particle receptor, putative, expressed	1.12e-06	3.11e-06	0.000188447	8.76e-05	0.000605	0.0368	1.18	1.04	0.627	-0.465	-0.333	0.712	0.0853
LOC_Os08g37700.2	RNA recognition motif containing protein, putative, expressed	0.000212328	2.12e-05	0.00139972	0.0924	0.0106	0.183	-1.42	-1.91	-1.08	0.316	0.804	-1.1	-0.018
LOC_Os08g37960.3	RNA recognition motif containing protein, expressed	0.000144224	0.00177312	0.000236501	0.0698	0.298	0.046	-2.45	-1.72	-2.3	0.836	0.101	-1.62	0.68
LOC_Os08g38086.4	heat shock protein, putative, expressed	0.000564507	9.27e-05	0.00723908	0.174	0.0481	0.418	-2.09	-2.67	-1.39	0.552	1.13	-1.54	-0.145
LOC_Os08g38240.1	transposon protein, putative, CACTA, En/Spm sub-class, expressed	2.72e-05	0.000411998	8.33e-06	0.0161	0.14	0.00039	-1.25	-0.876	-1.44	0.357	-0.0165	-0.892	0.552
LOC_Os08g39090.1	coiled-coil domain containing 49, putative, expressed	3.1e-06	2.44e-08	0.0113247	0.0007	6.34e-11	0.489	1.35	2.36	0.428	-0.32	-1.32	1.03	0.607
LOC_Os08g39160.1	formyl transferase, putative, expressed	0.000202757	1.3e-05	0.000180211	0.0896	0.00585	0.0352	-0.762	-1.08	-0.774	0.108	0.426	-0.654	0.12
LOC_Os08g39300.4	aminotransferase, putative, expressed	1.31e-05	7.78e-06	9.18e-06	0.00661	0.00284	0.000478	-1.06	-1.13	-1.11	0.237	0.306	-0.827	0.284
LOC_Os08g39850.4	lipoxygenase, chloroplast precursor, putative, expressed	1.84e-06	0.000191292	0.048149	0.000247	0.0856	0.68	-3.93	-2.21	0.844	2.61	0.889	-1.33	-2.17
LOC_Os08g39860.1	Os8bglu27 - beta-glucosidase homologue, similar to Os4bglu12 exoglucanase, expressed	6.55e-06	1.56e-05	1.5e-05	0.00247	0.00736	0.00118	-0.724	-0.652	-0.655	0.216	0.144	-0.508	0.147
LOC_Os08g40090.1	leucine rich repeat containing protein, expressed	9.49e-06	0.849174	0.994921	0.00432	0.842	0.893	-1.54	0.0346	0.00116	1.17	-0.412	-0.377	-0.378
LOC_Os08g40250.1	expressed protein	0.000122103	5.69e-05	0.00496929	0.0617	0.031	0.357	0.604	0.666	0.349	-0.199	-0.261	0.405	0.0555
LOC_Os08g40560.2	ZOS8-11 - C2H2 zinc finger protein, expressed	0.00177557	8.63e-05	0.204595	0.314	0.0452	0.805	0.553	0.845	0.174	-0.16	-0.452	0.393	0.219
LOC_Os08g41390.2	peptidyl-prolyl isomerase, putative, expressed	3.84e-05	8.08e-08	0.016276	0.0233	2.02e-08	0.543	0.671	1.39	0.268	-0.0902	-0.805	0.581	0.313
LOC_Os08g41810.1	ribosomal protein L22, putative, expressed	1.74e-07	6.8e-07	6.13e-06	3.77e-07	2.05e-05	0.000202	1.7	1.45	1.12	-0.63	-0.385	1.07	-0.0543
LOC_Os08g42920.1	60S ribosomal protein L7, putative, expressed	0.00722113	7.46e-05	0.0568571	0.495	0.0397	0.698	0.905	1.78	0.573	-0.0899	-0.966	0.815	0.242
LOC_Os08g43560.1	OsAPx4 - Peroxisomal Ascorbate Peroxidase encoding gene 5,8,9, expressed	1.47e-06	9.15e-06	0.000300924	0.000155	0.00362	0.0576	0.931	0.75	0.48	-0.391	-0.209	0.54	0.06
LOC_Os08g44380.1	L1P family of ribosomal proteins domain containing protein, expressed	8.43e-05	0.00015772	0.000240377	0.046	0.074	0.0468	-5.46	-5.03	-4.75	1.65	1.22	-3.81	0.942
LOC_Os08g44440.1	multiple myeloma tumor-associated protein 2, putative, expressed	0.000102264	6.69e-07	0.0242011	0.0539	1.97e-05	0.598	1.98	3.65	0.823	-0.37	-2.03	1.61	0.791
LOC_Os08g44480.1	40S ribosomal protein S25, putative, expressed	0.000785273	9.43e-05	0.885837	0.211	0.0488	0.887	1.61	2.15	-0.0483	-0.681	-1.22	0.927	0.975
LOC_Os08g44520.3	peptidyl-prolyl cis-trans isomerase, putative, expressed	0.00235838	6.19e-05	0.424778	0.352	0.0336	0.849	-0.462	0.77	-0.0928	0.515	-0.716	0.0538	0.147
LOC_Os08g44680.1	photosystem I reaction center subunit II, chloroplast precursor, putative, expressed	4.54e-05	0.00259032	0.779292	0.0273	0.347	0.881	0.755	0.429	0.0302	-0.452	-0.125	0.304	0.273
LOC_Os08g44780.1	expressed protein	0.000540731	0.0010895	6.9e-05	0.169	0.238	0.0121	2.97	2.68	3.91	-0.578	-0.29	2.39	-1.52
LOC_Os08g44810.1	lactate/malate dehydrogenase, putative, expressed	6.05e-05	3.17e-06	3.78e-06	0.0349	0.000629	6.1e-05	-0.79	-1.13	-1.11	0.0321	0.375	-0.758	0.352
LOC_Os08g44850.1	C2 domain containing protein, putative, expressed	0.000743275	1.66e-05	0.730287	0.205	0.00794	0.877	0.619	1.02	0.0444	-0.198	-0.6	0.421	0.376
LOC_Os09g01630.1	transposon protein, putative, CACTA, En/Spm sub-class, expressed	5.78e-09	0.022082	1.79e-05	3.25e-14	0.596	0.00159	-1.85	0.249	-0.732	1.26	-0.832	-0.583	0.15
LOC_Os09g02284.1	DNA-directed RNA polymerase subunit, putative, expressed	0.0343573	7.31e-05	0.17378	0.658	0.039	0.794	-0.293	-0.801	-0.174	-0.0239	0.484	-0.317	-0.143
LOC_Os09g02700.1	polyadenylate-binding protein, putative, expressed	6.07e-08	1.4e-08	1.36e-05	6.23e-09	2.73e-12	0.001	-1.55	-1.82	-0.825	0.498	0.774	-1.05	-0.223
LOC_Os09g03610.4	flowering time control protein FCA, putative, expressed	5.43e-07	0.000118315	0.00052712	1.37e-05	0.0592	0.0928	-3.2	-1.67	-1.36	1.64	0.11	-1.56	-0.196
LOC_Os09g07500.1	expressed protein	1.27e-08	7.25e-10	2.55e-06	1.44e-12	2.01e-14	2.3e-05	2.05	2.82	1.12	-0.553	-1.32	1.5	0.376
LOC_Os09g10720.1	AP2-associated protein kinase 1, putative, expressed	2.3e-05	0.737833	0.242382	0.0132	0.835	0.816	-3.11	-0.137	-0.495	2.17	-0.798	-0.934	-0.439
LOC_Os09g10760.1	RNA recognition motif containing protein, putative, expressed	0.000197004	2.17e-05	0.00319278	0.0878	0.0109	0.286	-1.07	-1.42	-0.709	0.27	0.618	-0.798	-0.0891
LOC_Os09g12270.1	peptidyl-prolyl cis-trans isomerase, FKBP-type, putative, expressed	6.82e-07	1.72e-07	1.58e-05	2.51e-05	3.37e-07	0.00129	2.39	2.8	1.65	-0.681	-1.09	1.71	0.0614
LOC_Os09g12800.1	zinc finger Ran-binding domain-containing protein 2, putative, expressed	0.000255798	0.000453422	2.82e-05	0.105	0.148	0.00327	-0.761	-0.703	-1.01	0.142	0.0841	-0.619	0.393
LOC_Os09g15775.1	expressed protein	4.13e-05	8.13e-05	0.0124446	0.025	0.0428	0.503	1.02	0.938	0.435	-0.424	-0.339	0.599	0.164
LOC_Os09g17730.2	proton pump interactor, putative, expressed	7.16e-08	4.73e-09	3.15e-05	1.26e-08	2.01e-14	0.00391	1.21	1.64	0.594	-0.351	-0.781	0.863	0.268
LOC_Os09g23160.1	annexin, putative, expressed	1.04e-07	3.53e-08	6.57e-08	5.79e-08	4.54e-10	4.49e-12	1.58	1.79	1.66	-0.323	-0.528	1.26	-0.407
LOC_Os09g23690.1	UBX domain containing protein, expressed	0.0264037	9.16e-05	0.164708	0.634	0.0476	0.79	0.398	0.993	0.227	0.00653	-0.588	0.404	0.177
LOC_Os09g23730.1	HMG-Y-related protein A, putative, expressed	0.000103118	0.00521085	4.31e-05	0.0543	0.435	0.00642	-0.934	-0.524	-1.04	0.308	-0.101	-0.626	0.419
LOC_Os09g24414.1	chloroplast 50S ribosomal protein L22, putative, expressed	0.00046667	1.31e-05	8.15e-05	0.154	0.00588	0.0146	-0.736	-1.17	-0.931	0.0271	0.461	-0.709	0.221
LOC_Os09g24540.1	peptidyl-prolyl cis-trans isomerase, putative, expressed	7.58e-05	5.77e-06	0.0207103	0.042	0.00177	0.577	0.832	1.14	0.344	-0.252	-0.564	0.58	0.236
LOC_Os09g26440.1	expressed protein	0.0635491	0.000229992	6.16e-05	0.707	0.0975	0.0105	0.444	-1.23	-1.46	-1.01	0.668	-0.561	0.899
LOC_Os09g26920.1	OsSub57 - Putative Subtilisin homologue, expressed	4.33e-05	0.000112345	0.01128	0.0261	0.0568	0.488	-1.16	-1.02	-0.505	0.486	0.353	-0.672	-0.167
LOC_Os09g27850.1	transcription regulator, putative, expressed	0.0241802	0.000559194	0.000201833	0.626	0.165	0.0394	-0.429	-0.822	-0.946	-0.12	0.273	-0.549	0.397
LOC_Os09g29840.1	heat shock protein, putative, expressed	0.00198804	0.00136472	0.000160439	0.329	0.266	0.0313	-0.422	-0.447	-0.605	0.0534	0.0786	-0.368	0.236
LOC_Os09g29980.2	transposon protein, putative, CACTA, En/Spm sub-class, expressed	4.67e-05	0.000781032	0.000129762	0.028	0.2	0.0249	-1.15	-0.787	-1.01	0.413	0.0509	-0.736	0.272
LOC_Os09g33970.1	expressed protein	2.17e-05	0.000226788	8.63e-06	0.0123	0.0966	0.00042	-1.27	0.941	1.42	1.54	-0.668	0.273	-1.15
LOC_Os09g34070.2	RNA recognition motif containing protein, expressed	8.59e-05	0.265887	0.7654	0.0467	0.781	0.88	-3.63	-0.647	0.168	2.6	-0.38	-1.03	-1.19
LOC_Os09g34910.1	DEAD-box ATP-dependent RNA helicase 7, putative, expressed	0.290546	0.295525	0.000203185	0.802	0.787	0.0396	-0.112	0.11	-0.59	-0.0362	-0.258	-0.148	0.442
LOC_Os09g35670.2	expressed protein	4.27e-05	4.94e-07	0.528868	0.0258	8.81e-06	0.861	2.03	3.45	0.183	-0.611	-2.03	1.41	1.23
LOC_Os09g35710.3	UBX domain-containing protein, putative, expressed	1.49e-05	1.72e-05	0.000416734	0.00779	0.0083	0.0766	8.42	8.27	5.47	-2.88	-2.73	5.54	0.0689
LOC_Os09g36440.1	transcription initiation factor IIB, putative, expressed	0.00134603	3.18e-05	0.000156803	0.278	0.017	0.0305	1.75	2.92	2.38	0.00706	-1.15	1.76	-0.615
LOC_Os09g36700.1	ribonuclease T2 family domain containing protein, expressed	2.3e-08	5.5e-10	2.47e-06	4.83e-11	2.01e-14	2.11e-05	-2.8	-4.23	-1.64	0.63	2.06	-2.17	-0.527
LOC_Os09g36770.3	NTMC2Type1.2 protein, putative, expressed	3.73e-09	1.4e-09	1.77e-07	3.25e-14	2.01e-14	1.21e-09	1.82	2.02	1.18	-0.562	-0.769	1.26	0.076
LOC_Os09g36860.1	acyl carrier protein, putative, expressed	0.000705505	0.00139707	2.24e-05	0.199	0.268	0.00227	-0.897	-0.811	-1.42	0.116	0.03	-0.781	0.635
LOC_Os09g37006.2	protein of unknown function domain containing protein, expressed	1.18e-05	4.71e-07	9.52e-05	0.00583	7.72e-06	0.0175	-1.29	-1.89	-0.996	0.249	0.844	-1.04	-0.0485
LOC_Os09g37760.1	bromodomain domain containing protein, expressed	7.91e-06	1.67e-07	0.13476	0.00331	3.1e-07	0.775	1.42	2.22	-0.26	-0.573	-1.38	0.845	1.11
LOC_Os09g37860.1	NOL1/NOP2/sun family protein, putative, expressed	0.000121405	4.44e-06	0.0559089	0.0614	0.00115	0.696	0.603	0.908	0.208	-0.173	-0.478	0.429	0.222
LOC_Os09g38090.1	expressed protein	0.000197684	2.16e-06	0.00536137	0.088	0.000295	0.37	0.576	1.01	0.351	-0.0924	-0.524	0.484	0.133
LOC_Os09g38772.1	MOSC domain-containing protein, mitochondrial precursor, putative, expressed	4.24e-06	0.061942	0.976719	0.0012	0.686	0.892	-2.69	0.595	0.0084	2.17	-1.12	-0.523	-0.531
LOC_Os09g39770.1	C2 domain containing protein, putative, expressed	4.72e-06	1.64e-06	0.000263207	0.00144	0.000167	0.0509	1.13	1.28	0.683	-0.358	-0.508	0.775	0.0917
LOC_Os09g39960.1	dynamin family protein, putative, expressed	0.000108055	0.00778258	1.04e-05	0.0563	0.484	0.000617	1.1	0.58	1.48	-0.313	0.211	0.791	-0.688
LOC_Os10g02040.1	peroxidase precursor, putative, expressed	1.02e-06	6.3e-07	1.12e-05	7.1e-05	1.7e-05	0.000701	-1.33	-1.41	-1	0.396	0.473	-0.936	0.0676
LOC_Os10g06130.5	RNA recognition motif containing protein, expressed	4.42e-06	6.62e-05	0.221538	0.00129	0.0357	0.81	-1.23	-0.88	-0.168	0.658	0.311	-0.568	-0.401
LOC_Os10g06540.1	vesicle-associated membrane protein, putative, expressed	7.42e-05	0.000809582	0.00804642	0.0414	0.204	0.435	1.03	0.744	0.513	-0.458	-0.172	0.572	0.0592
LOC_Os10g07200.1	hsp20/alpha crystallin family protein, putative, expressed	1.9e-05	8.43e-07	1.66e-05	0.0104	3.6e-05	0.0014	2.39	3.46	2.43	-0.32	-1.39	2.07	-0.36
LOC_Os10g10990.3	transcription initiation factor IIF, alpha subunit domain containing protein, expressed	8.58e-05	1.29e-06	0.000860842	0.0467	9.88e-05	0.134	1.06	1.77	0.776	-0.161	-0.869	0.903	0.127
LOC_Os10g17280.1	ATP synthase gamma chain, putative, expressed	6.03e-06	4.22e-05	6.54e-05	0.00217	0.023	0.0113	1.1	0.864	0.818	-0.402	-0.17	0.695	-0.123
LOC_Os10g17790.1	remorin C-terminal domain containing protein, putative, expressed	1.17e-06	1.74e-07	0.000511422	9.69e-05	3.53e-07	0.0907	2.54	3.16	1.19	-0.82	-1.44	1.72	0.537
LOC_Os10g18340.1	expressed protein	8.11e-10	0.0698842	5.97e-06	3.25e-14	0.695	0.000191	-3.26	-0.264	1.19	2.67	-0.32	-0.583	-1.77
LOC_Os10g21314.1	chloroplast 50S ribosomal protein L20, putative, expressed	0.00023165	5.99e-06	0.00120045	0.098	0.00188	0.167	-1.52	-2.41	-1.2	0.237	1.13	-1.28	-0.0797
LOC_Os10g21342.1	chloroplast 50S ribosomal protein L14, putative, expressed	0.000246711	8.85e-06	3.06e-06	0.102	0.00344	3.68e-05	-0.894	-1.36	-1.55	-0.0573	0.412	-0.951	0.596
LOC_Os10g21344.1	chloroplast 50S ribosomal protein L16, putative, expressed	0.00791491	0.000157785	5.53e-05	0.506	0.0741	0.00916	-0.61	-1.11	-1.27	-0.137	0.361	-0.746	0.522
LOC_Os10g21910.1	acetyl-CoA carboxylase, putative, expressed	5.81e-12	1.57e-10	2.11e-07	3.25e-14	2.01e-14	2.87e-09	4.24	2.95	1.32	-2.11	-0.824	2.13	0.804
LOC_Os10g25450.1	OsSub60 - Putative Subtilisin homologue, expressed	4.64e-06	1.69e-07	4.76e-06	0.00139	3.21e-07	0.00011	-0.881	-1.29	-0.878	0.118	0.53	-0.763	0.115
LOC_Os10g25770.2	transcription initiation factor IIE subunit beta, putative, expressed	4.96e-05	3.17e-05	0.000551451	0.0295	0.0169	0.096	1.48	1.57	1.07	-0.45	-0.536	1.03	-0.0437
LOC_Os10g26130.1	phenylalanyl-tRNA synthetase, putative, expressed	2.49e-06	3.52e-07	0.000266829	0.000457	3.36e-06	0.0515	0.894	1.12	0.499	-0.265	-0.493	0.628	0.13
LOC_Os10g27190.1	40S ribosomal protein S17, putative, expressed	1.52e-07	2.83e-09	0.050794	2.42e-07	2.01e-14	0.686	1.83	2.86	0.291	-0.587	-1.62	1.25	0.956
LOC_Os10g29560.1	transposon protein, putative, CACTA, En/Spm sub-class, expressed	5.33e-05	1.26e-07	0.00530217	0.0314	1.16e-07	0.368	1.32	2.69	0.677	-0.145	-1.52	1.17	0.495
LOC_Os10g30370.2	RNA recognition motif containing protein, putative, expressed	0.00345812	0.202051	1.36e-06	0.402	0.765	3.93e-06	-0.412	-0.145	-1.16	-0.0173	-0.284	-0.429	0.731
LOC_Os10g30870.1	expressed protein	1.87e-05	1.66e-05	0.000107007	0.0103	0.00796	0.0198	-1.54	-1.56	-1.23	0.454	0.477	-1.08	0.151
LOC_Os10g31520.1	ribosomal RNA assembly protein mis3, putative, expressed	0.00037929	9.25e-06	0.205547	0.134	0.00368	0.805	0.696	1.12	0.174	-0.198	-0.623	0.498	0.323
LOC_Os10g31770.1	START domain containing protein, expressed	5.14e-07	6.22e-07	1.59e-06	1.18e-05	1.64e-05	6.28e-06	1.44	1.41	1.27	-0.413	-0.382	1.03	-0.236
LOC_Os10g32550.1	T-complex protein, putative, expressed	9.79e-05	1.57e-05	0.00981686	0.0521	0.00746	0.467	0.61	0.767	-0.303	-0.341	-0.499	0.269	0.572
LOC_Os10g32710.3	WD domain, G-beta repeat domain containing protein, expressed	4.82e-11	0.0100254	0.14115	3.25e-14	0.513	0.778	-3.32	-0.31	0.155	2.45	-0.558	-0.869	-1.02
LOC_Os10g32880.1	WD domain, G-beta repeat domain containing protein, expressed	1.85e-05	1.18e-06	0.000775664	0.0102	8.1e-05	0.125	0.974	1.35	0.595	-0.244	-0.622	0.731	0.135
LOC_Os10g33370.1	3-ketoacyl-CoA synthase precursor, putative, expressed	0.0158944	0.649598	9.84e-05	0.584	0.828	0.0181	1.96	0.313	4.35	-0.308	1.34	1.66	-2.69
LOC_Os10g33720.3	methyltransferase, putative, expressed	1.3e-05	0.00132995	4.74e-05	0.00658	0.262	0.0074	0.842	0.455	0.717	-0.338	0.0488	0.503	-0.214
LOC_Os10g33800.1	lactate/malate dehydrogenase, putative, expressed	0.000115662	2.35e-05	9.04e-05	0.0593	0.0119	0.0165	-0.637	-0.781	-0.658	0.118	0.261	-0.519	0.139
LOC_Os10g34380.1	retrotransposon protein, putative, unclassified, expressed	4.88e-06	5.85e-08	0.000334071	0.00152	5.18e-09	0.0632	1.1	1.83	0.644	-0.206	-0.937	0.894	0.249
LOC_Os10g34750.2	LIG1 - Putative DNA ligase I, expressed	3.04e-06	9.11e-07	0.100143	0.000676	4.37e-05	0.751	0.894	1.03	0.163	-0.372	-0.507	0.521	0.358
LOC_Os10g35560.2	expressed protein	1.39e-07	0.24259	0.323949	1.78e-07	0.776	0.834	-2.1	-0.184	0.154	1.57	-0.349	-0.533	-0.687
LOC_Os10g35870.1	cytochrome b5-like Heme/Steroid binding domain containing protein, expressed	0.00124903	0.0317639	0.000124357	0.268	0.63	0.0237	0.781	0.431	1.08	-0.209	0.142	0.573	-0.506
LOC_Os10g36870.1	src homology-3 domain protein 3, putative, expressed	1.22e-06	7.55e-09	2.88e-05	0.000107	3.93e-14	0.00337	1.2	2.14	0.825	-0.161	-1.1	1.04	0.218
LOC_Os10g38060.1	phospholipase D, putative, expressed	0.000291526	6.13e-06	0.00125602	0.114	0.00194	0.172	1.48	2.41	1.2	-0.206	-1.14	1.27	0.0727
LOC_Os10g38214.1	chloroplast 30S ribosomal protein S4, putative, expressed	0.0008242	5.04e-06	2.92e-05	0.217	0.00143	0.00344	-0.422	-0.816	-0.659	-0.0522	0.342	-0.474	0.185
LOC_Os10g38278.1	chloroplast 30S ribosomal protein S2, putative, expressed	6.6e-05	1.3e-05	7.15e-05	0.0375	0.00583	0.0126	-0.872	-1.07	-0.863	0.171	0.367	-0.7	0.162
LOC_Os10g41030.1	agenet domain containing protein, putative, expressed	1.13e-08	3.41e-09	1.01e-06	7.18e-13	2.01e-14	1.56e-06	1.98	2.26	1.19	-0.62	-0.902	1.35	0.168
LOC_Os10g41400.1	peptide methionine sulfoxide reductase, putative, expressed	1.74e-05	0.406914	0.0503847	0.00939	0.804	0.685	-1.69	-0.181	-0.468	1.1	-0.404	-0.584	-0.116
LOC_Os10g41440.1	KH domain containing protein, putative, expressed	1.42e-08	3.18e-08	1.59e-05	2.73e-12	2.64e-10	0.00131	-1.95	-1.78	-0.866	0.799	0.631	-1.15	-0.282
LOC_Os10g41820.2	dynamin family protein, putative, expressed	5.68e-06	2.05e-05	0.000301532	0.00197	0.0102	0.0577	0.951	0.814	0.575	-0.366	-0.229	0.585	0.00975
LOC_Os10g41960.1	eukaryotic translation initiation factor 3 subunit B, putative, expressed	5.97e-05	4.97e-06	7.25e-05	0.0345	0.00139	0.0128	0.57	0.773	0.556	-0.0951	-0.298	0.475	-0.0812
LOC_Os10g42230.3	AT hook motif domain containing protein, expressed	7.72e-05	0.605521	0.625765	0.0427	0.824	0.87	4.18	-0.332	0.313	-3.14	1.37	1.04	0.727
LOC_Os10g42724.1	VHS and GAT domain containing protein, expressed	6.41e-06	0.978226	0.356475	0.00239	0.849	0.84	-4.64	0.0142	0.491	3.6	-1.05	-1.03	-1.52
LOC_Os11g02369.1	LTPL7 - Protease inhibitor/seed storage/LTP family protein precursor, expressed	0.0329086	0.0118658	6.58e-05	0.654	0.532	0.0114	-0.226	-0.282	-0.619	-0.0558	2.5e-05	-0.282	0.337
LOC_Os11g05556.2	signal recognition particle 54 kDa protein, putative, expressed	1.05e-05	7.65e-07	0.272029	0.00499	2.8e-05	0.823	0.915	1.25	-0.124	-0.406	-0.737	0.509	0.633
LOC_Os11g06720.1	abscisic stress-ripening, putative, expressed	6.4e-05	0.859743	0.369303	0.0366	0.842	0.842	-4.11	-0.108	-0.562	2.91	-1.09	-1.19	-0.632
LOC_Os11g07470.1	expressed protein	6.54e-05	0.35101	0.000898112	0.0372	0.796	0.138	-0.597	-0.0852	-0.418	0.322	-0.19	-0.275	0.143
LOC_Os11g08330.1	POLD1 - Putative DNA polymerase delta catalytic subunit, expressed	0.000460952	4.59e-05	0.0430748	0.152	0.0251	0.668	0.51	0.692	0.225	-0.153	-0.335	0.357	0.131
LOC_Os11g08980.1	preprotein translocase secA family protein, putative, expressed	0.00552699	8.69e-05	0.0248337	0.462	0.0455	0.601	1.45	2.66	1.08	-0.151	-1.37	1.3	0.221
LOC_Os11g10510.1	dehydrogenase, putative, expressed	0.000121504	0.00250505	0.000131444	0.0615	0.342	0.0252	1.13	0.73	1.11	-0.384	0.0128	0.743	-0.372
LOC_Os11g13420.2	RNA binding protein, putative, expressed	0.00084566	5.41e-05	0.0642142	0.22	0.0296	0.71	3.77	5.47	1.63	-1.05	-2.75	2.72	1.09
LOC_Os11g19810.2	PWWP domain containing protein, expressed	7.76e-06	5.11e-07	0.00563124	0.00321	9.67e-06	0.378	0.767	1.06	0.308	-0.235	-0.523	0.533	0.225
LOC_Os11g26850.2	erythronate-4-phosphate dehydrogenase, putative, expressed	0.00129658	4.52e-05	0.00104341	0.273	0.0247	0.153	-0.465	-0.735	-0.48	0.0448	0.315	-0.42	0.0602
LOC_Os11g29390.1	bifunctional dihydrofolate reductase-thymidylate synthase, putative, expressed	3.14e-05	0.273889	0.608344	0.0189	0.783	0.868	-1.22	-0.189	0.086	0.892	-0.143	-0.331	-0.417
LOC_Os11g29400.1	6-phosphogluconate dehydrogenase, decarboxylating, putative, expressed	7.91e-05	8.78e-06	2.03e-05	0.0435	0.00341	0.00195	-0.554	-0.728	-0.658	0.0692	0.243	-0.485	0.173
LOC_Os11g32240.1	cytochrome P450 51, putative, expressed	0.00690148	9.68e-05	0.0294417	0.49	0.05	0.623	-0.453	-0.856	-0.337	0.0417	0.444	-0.412	-0.0745
LOC_Os11g34190.1	expressed protein	3.86e-05	2.34e-06	0.00315594	0.0234	0.000344	0.285	1.05	1.47	0.565	-0.277	-0.7	0.772	0.206
LOC_Os11g34300.2	chromatin modification-related protein EAF3, putative, expressed	6.73e-05	0.000161732	0.000908432	0.0381	0.0754	0.139	1.11	0.994	0.782	-0.392	-0.272	0.723	-0.0591
LOC_Os11g36060.2	THUMP domain-containing protein, putative, expressed	1.32e-07	1.74e-07	1.79e-05	1.44e-07	3.49e-07	0.00158	-2.74	-2.65	-1.54	1	0.921	-1.73	-0.192
LOC_Os11g36340.1	lymphoid organ expressed yellow head virus receptor protein, putative, expressed	3.29e-07	2.33e-07	0.000276713	3.27e-06	9.24e-07	0.0533	2.26	2.35	0.994	-0.86	-0.951	1.4	0.409
LOC_Os11g36420.1	sialyltransferase family domain containing protein, expressed	0.0777116	5.58e-05	0.0143561	0.722	0.0305	0.525	-0.303	-1.07	-0.46	-0.155	0.613	-0.459	0.00107
LOC_Os11g37080.1	h/ACA ribonucleoprotein complex subunit 1-like protein 1, putative, expressed	1.5e-06	4.23e-07	2.83e-05	0.000161	5.7e-06	0.00328	1.4	1.62	0.982	-0.398	-0.617	0.999	0.0167
LOC_Os11g37690.1	TBC domain containing protein, expressed	6.01e-07	2.84e-07	1.46e-06	1.79e-05	1.74e-06	4.87e-06	2.31	2.51	2.08	-0.582	-0.788	1.73	-0.356
LOC_Os11g38010.1	targeting protein for Xklp2, putative, expressed	4.05e-06	2.41e-06	0.0173314	0.00112	0.000364	0.552	1.92	2.04	0.575	-0.786	-0.907	1.13	0.559
LOC_Os11g38670.1	DEAD-box ATP-dependent RNA helicase, putative, expressed	0.00776781	0.00301132	0.000100943	0.504	0.366	0.0186	-0.391	-0.46	-0.75	-0.0095	0.0601	-0.4	0.35
LOC_Os11g38920.1	HVA22, putative, expressed	9.69e-05	8.04e-05	0.0210286	0.0517	0.0424	0.579	1.58	1.62	0.673	-0.614	-0.652	0.97	0.297
LOC_Os11g40090.1	A49-like RNA polymerase I associated factor family protein, expressed	0.000393113	9.18e-06	0.675351	0.137	0.00364	0.874	0.874	1.41	0.0698	-0.284	-0.825	0.59	0.52
LOC_Os11g40140.1	peptidase, T1 family, putative, expressed	1.9e-05	7.3e-05	0.000186112	0.0104	0.039	0.0364	-0.96	-0.81	-0.717	0.338	0.189	-0.622	0.0952
LOC_Os11g45590.1	transposon protein, putative, CACTA, En/Spm sub-class, expressed	7.29e-06	0.00238631	3.38e-06	0.00292	0.336	4.71e-05	-1.23	-0.564	-1.35	0.443	-0.22	-0.784	0.561
LOC_Os11g46240.1	retrotransposon protein, putative, unclassified, expressed	0.00119253	0.0120089	0.000163508	0.262	0.533	0.0319	-0.925	-0.625	-1.22	0.232	-0.0682	-0.693	0.53
LOC_Os11g47770.1	selT/selW/selH selenoprotein domain containing protein, expressed	2.29e-08	1.51e-08	1.47e-05	4.67e-11	4.25e-12	0.00114	1.48	1.55	0.7	-0.546	-0.616	0.931	0.232
LOC_Os12g01390.1	clathrin heavy chain, putative, expressed	0.00145214	4.55e-05	0.000201246	0.288	0.0249	0.0392	-0.6	-0.964	-0.794	0.0101	0.374	-0.589	0.205
LOC_Os12g04290.1	PP2A regulatory subunit TAP46, putative, expressed	7.05e-05	0.574256	0.145641	0.0396	0.822	0.781	-6.24	-0.533	-1.45	4.18	-1.52	-2.06	-0.601
LOC_Os12g06020.1	mRNA-decapping enzyme, putative, expressed	8.87e-06	0.0158621	0.351063	0.00392	0.563	0.839	-3.58	-1.2	0.4	2.49	0.104	-1.1	-1.5
LOC_Os12g06910.1	nucleolar protein family 6, putative, expressed	4.05e-09	9.42e-10	3.52e-07	3.25e-14	2.01e-14	2.91e-08	1.95	2.29	1.18	-0.594	-0.935	1.36	0.174
LOC_Os12g07300.1	N-acetyltransferase 10, putative, expressed	3.46e-05	2.69e-05	0.0441864	0.0209	0.014	0.671	0.882	0.91	0.276	-0.365	-0.393	0.517	0.241
LOC_Os12g08170.1	2-oxo acid dehydrogenases acyltransferase domain containing protein, expressed	6.06e-05	4.56e-05	0.000670778	0.0349	0.0249	0.112	0.675	0.7	-0.488	-0.454	-0.478	0.222	0.71
LOC_Os12g09089.2	protein kinase PKN/PRK1, effector, putative, expressed	5.91e-05	0.07962	0.130209	0.0342	0.704	0.772	-2.26	0.638	0.538	1.99	-0.908	-0.27	-0.808
LOC_Os12g15420.1	nucampholin, putative, expressed	3.97e-05	0.00110754	3.07e-06	0.024	0.24	3.71e-05	-0.728	-0.464	-0.993	0.182	-0.0824	-0.546	0.447
LOC_Os12g16720.1	cytochrome P450 71A1, putative, expressed	0.313541	1.9e-06	0.060321	0.806	0.000226	0.704	-0.306	-3.03	0.614	-0.375	2.35	-0.681	-1.29
LOC_Os12g18880.1	mago nashi, putative, expressed	4.2e-07	0.005753	0.0275285	6.74e-06	0.447	0.615	-1.58	-0.449	-0.328	0.991	-0.14	-0.589	-0.261
LOC_Os12g23180.1	3-beta hydroxysteroid dehydrogenase/isomerase family protein, putative, expressed	0.000592272	0.0322998	1.89e-05	0.179	0.632	0.00173	0.494	0.243	-0.776	-0.504	-0.253	-0.00973	0.766
LOC_Os12g32190.2	expressed protein	2.58e-05	1.76e-05	0.033273	0.0151	0.00854	0.638	4.45	4.66	1.44	-1.81	-2.02	2.64	1.2
LOC_Os12g35030.1	plus-3 domain containing protein, expressed	0.000121689	3.46e-06	0.328124	0.0615	0.000738	0.835	0.683	1.06	-0.111	-0.275	-0.653	0.408	0.519
LOC_Os12g35270.1	expressed protein	0.00180895	1.92e-05	0.032528	0.316	0.00947	0.635	1.28	2.36	0.741	-0.181	-1.27	1.09	0.354
LOC_Os12g35570.1	tRNA synthetase, putative, expressed	3.77e-06	9.62e-06	9.76e-05	0.000995	0.00389	0.0179	0.91	0.814	0.61	-0.327	-0.23	0.583	-0.0262
LOC_Os12g36194.1	nucleoside diphosphate kinase, putative, expressed	0.00125512	0.000245365	5.62e-05	0.269	0.102	0.00937	-1.12	-1.42	-1.72	0.0583	0.353	-1.07	0.655
LOC_Os12g37260.1	lipoxygenase 2.1, chloroplast precursor, putative, expressed	4.49e-07	3.25e-05	8.59e-08	8.14e-06	0.0174	2.21e-11	4.44	2.67	5.35	-1.32	0.447	3.11	-2.24
LOC_Os12g40560.1	KH domain containing protein, putative, expressed	5.31e-05	0.000153145	0.00304484	0.0313	0.0724	0.279	-1.93	-1.69	-1.09	0.757	0.508	-1.18	-0.0865
LOC_Os12g41250.1	methylcrotonoyl-CoA carboxylase subunit alpha, mitochondrial precursor, putative, expressed	1.74e-10	4.14e-09	1.18e-06	3.25e-14	2.01e-14	2.48e-06	3.5	2.47	1.3	-1.68	-0.65	1.82	0.515
LOC_Os12g41930.1	SRP40, C-terminal domain containing protein, expressed	2.15e-08	2.94e-10	0.000151775	3.39e-11	2.01e-14	0.0295	1.73	2.78	0.606	-0.451	-1.5	1.28	0.675
LOC_Os12g41962.4	nucleolar protein NOP5, putative, expressed	8.84e-05	0.000145464	0.0243803	0.0479	0.0697	0.599	2.69	2.52	1.09	-1.11	-0.943	1.57	0.482
LOC_Os12g42140.1	G-patch domain containing protein, putative, expressed	1.91e-05	0.421597	0.611574	0.0105	0.806	0.869	-2.37	-0.249	-0.155	1.68	-0.445	-0.694	-0.538
LOC_Os12g42884.3	5-methyltetrahydropteroyltriglutamate--homocysteine methyltransferase, putative, expressed	1.4e-05	0.00270343	0.00309117	0.00719	0.352	0.281	-0.839	-0.409	-0.4	0.427	-0.00305	-0.412	-0.0119
LOC_Os12g43600.1	RNA recognition motif containing protein, expressed	0.00306505	1.23e-05	0.117031	0.386	0.00546	0.764	-0.598	-1.27	-0.26	0.0658	0.739	-0.532	-0.273
LOC_Os12g44330.2	serine/threonine-protein kinase PRP4, putative, expressed	3.73e-05	3.75e-08	0.226557	0.0226	6.15e-10	0.812	0.788	1.77	0.138	-0.115	-1.09	0.673	0.535
ChrSy.fgenesh.mRNA.86	40S ribosomal protein S5, putative, expressed	0.624002	0.533007	0.619062	0.84	0.818	0.869	0.109	0.139	0.111	-0.0193	-0.0496	0.0898	-0.0209
ChrUn.fgenesh.mRNA.96	decarboxylase, putative, expressed	0.499631	0.948677	0.843972	0.829	0.848	0.885	-1.37	-0.129	0.395	1.09	-0.147	-0.276	-0.671
LOC_Os01g01060.1	shikimate kinase, putative, expressed	0.282538	0.298219	0.636337	0.8	0.787	0.871	0.165	-0.16	-0.0709	-0.182	0.144	-0.0163	0.0546
LOC_Os01g01080.1	translocon-associated protein beta domain containing protein, expressed	0.612984	0.23406	0.0822177	0.839	0.774	0.733	0.586	1.43	2.18	0.463	-0.377	1.05	-1.13
LOC_Os01g01302.1	retrotransposon protein, putative, Ty1-copia subclass, expressed	0.218966	0.827441	0.532697	0.787	0.84	0.861	0.987	-0.168	0.485	-0.661	0.494	0.326	-0.159
LOC_Os01g01307.1	stress responsive protein, putative, expressed	0.000135786	0.0008659	0.337142	0.0667	0.211	0.836	1.17	0.903	0.189	-0.602	-0.338	0.565	0.376
LOC_Os01g01312.1	sas10/Utp3 family protein, expressed	0.0379772	0.228612	0.232252	0.666	0.772	0.813	-2.32	1.24	1.23	2.36	-1.2	0.0353	-1.19
LOC_Os01g01450.2	Rer1 protein, putative, expressed	0.0518347	0.000719644	0.296195	0.692	0.191	0.829	-0.33	-0.735	-0.164	0.0228	0.428	-0.307	-0.143
LOC_Os01g01510.1	isoflavone reductase homolog IRL, putative, expressed	0.321638	0.00156051	0.0968336	0.807	0.282	0.748	0.248	1.05	-0.438	-0.0331	-0.835	0.215	0.653
LOC_Os01g01640.1	isoflavone reductase, putative, expressed	0.864187	0.791236	0.59899	0.856	0.838	0.868	-0.029	0.0449	-0.0898	0.0105	-0.0634	-0.0185	0.0713
LOC_Os01g01650.1	anaphase-promoting complex subunit 11, putative, expressed	0.974053	0.43242	0.0889251	0.862	0.807	0.74	0.0543	-1.33	-3.09	-1.15	0.241	-1.09	2
LOC_Os01g01660.1	1-deoxy-D-xylulose 5-phosphate reductoisomerase, chloroplast precursor, putative, expressed	0.00358429	0.00228235	0.00128144	0.407	0.33	0.174	-1.06	-1.14	-1.25	0.198	0.278	-0.861	0.385
LOC_Os01g01700.1	transcriptional repressor, putative, expressed	0.232993	0.58465	0.538207	0.79	0.823	0.862	-0.328	0.146	0.164	0.324	-0.15	-0.00457	-0.169
LOC_Os01g01710.2	peptidyl-prolyl cis-trans isomerase, putative, expressed	0.927142	0.981867	0.86272	0.859	0.849	0.886	0.099	-0.0246	-0.187	-0.127	-0.00363	-0.0282	0.159
LOC_Os01g01960.1	expressed protein	0.273619	0.307251	0.82476	0.799	0.789	0.883	-0.217	-0.202	0.0425	0.123	0.108	-0.094	-0.137
LOC_Os01g02080.1	Ser/Thr receptor-like kinase, putative, expressed	0.882966	0.292153	0.999937	0.857	0.786	0.893	-0.193	1.42	-0.000104	0.5	-1.12	0.308	0.308
LOC_Os01g02170.2	elongation factor Tu, putative, expressed	0.0658483	0.896755	0.478381	0.71	0.845	0.856	0.997	0.0637	-0.353	-0.82	0.113	0.177	0.53
LOC_Os01g02440.1	fructose-bisphospate aldolase isozyme, putative, expressed	0.523073	0.798974	0.392024	0.831	0.839	0.845	0.477	-0.188	-0.645	-0.566	0.0991	-0.0891	0.556
LOC_Os01g02720.1	ATP-dependent RNA helicase DHX36, putative, expressed	0.227852	0.395935	0.917926	0.789	0.803	0.889	-1.41	-0.972	0.116	0.843	0.405	-0.567	-0.682
LOC_Os01g02880.1	tRNA synthetase class I, putative, expressed	0.130489	0.0023648	0.598523	0.756	0.335	0.867	0.149	0.373	0.0489	-0.00635	-0.23	0.143	0.0937
LOC_Os01g02884.1	splicing factor, putative, expressed	0.188723	0.000714831	0.0732382	0.778	0.19	0.723	-0.426	-1.49	-0.607	-0.206	0.862	-0.632	-0.025
LOC_Os01g03020.1	white-brown complex homolog protein 7, putative, expressed	0.383669	0.326171	0.512025	0.816	0.792	0.859	0.149	0.168	-0.111	-0.097	-0.117	0.0515	0.162
LOC_Os01g03060.3	expressed protein	0.000368022	0.00598187	0.0908691	0.132	0.452	0.742	-1.75	-1.14	-0.605	0.879	0.265	-0.874	-0.269
LOC_Os01g03144.1	BBTI3 - Bowman-Birk type bran trypsin inhibitor precursor, expressed	0.0839382	0.0172516	0.0273081	0.727	0.571	0.613	-0.598	-0.894	-0.808	0.0226	0.319	-0.575	0.233
LOC_Os01g03270.1	BBTI4 - Bowman-Birk type bran trypsin inhibitor precursor, expressed	0.424604	0.604407	0.552794	0.821	0.824	0.863	0.785	0.504	-0.579	-0.608	-0.327	0.178	0.757
LOC_Os01g03330.1	BBTI5 - Bowman-Birk type bran trypsin inhibitor precursor, expressed	0.330045	0.0605668	0.763771	0.808	0.684	0.88	-1.6	-3.32	-0.481	0.247	1.97	-1.35	-0.868
LOC_Os01g03340.1	BBTI7 - Bowman-Birk type bran trypsin inhibitor precursor, expressed	0.946298	0.713334	0.788413	0.86	0.833	0.881	-0.0182	-0.0997	0.0727	0.00691	0.0884	-0.0113	-0.084
LOC_Os01g03360.1	WD domain, G-beta repeat domain containing protein, expressed	0.267739	0.142844	0.320196	0.798	0.744	0.833	0.328	-0.445	-0.292	-0.43	0.343	-0.102	0.189
LOC_Os01g03390.1	multi-copper oxidase type I family protein, putative, expressed	0.727941	0.217135	0.546142	0.847	0.769	0.863	0.0661	-0.244	0.115	-0.0817	0.228	-0.0156	-0.131
LOC_Os01g03510.1	sufB/sufD domain containing protein, putative, expressed	0.553699	0.0453226	0.335199	0.834	0.661	0.836	-0.411	-1.55	0.681	0.0914	1.23	-0.32	-1
LOC_Os01g03549.1	expressed protein	0.218334	0.00542082	0.170739	0.786	0.44	0.792	-0.268	-0.733	-0.301	-0.0577	0.408	-0.326	-0.0243
LOC_Os01g03650.1	C2 domain containing protein, putative, expressed	0.42832	0.765916	0.00551619	0.822	0.836	0.374	0.727	-0.269	3.16	0.178	1.17	0.906	-2.26
LOC_Os01g03760.1	transporter family protein, putative, expressed	0.000196673	0.000406455	0.131019	0.0877	0.139	0.773	0.607	0.55	0.169	-0.276	-0.218	0.332	0.163
LOC_Os01g03820.1	glycosyl hydrolase family 10 protein, putative, expressed	0.371611	0.236646	0.54306	0.815	0.774	0.862	0.8	1.08	0.538	-0.196	-0.474	0.604	0.0661
LOC_Os01g04190.4	muconate cycloisomerase, putative, expressed	0.894263	0.947147	0.306581	0.857	0.847	0.831	0.0677	0.0337	0.536	0.0918	0.126	0.159	-0.377
LOC_Os01g04300.1	PB1 domain containing protein, expressed	0.000440522	0.824062	0.334807	0.148	0.84	0.836	4.17	0.179	0.796	-2.88	1.11	1.29	0.49
LOC_Os01g04630.1	leucine-rich repeat protein-related, putative, expressed	0.0897712	0.0727227	0.653128	0.732	0.698	0.872	-1.81	-1.93	-0.442	0.761	0.885	-1.04	-0.602
LOC_Os01g04650.1	B3 DNA binding domain containing protein, expressed	0.000556168	0.557065	0.74645	0.172	0.82	0.879	-2.31	0.273	0.149	1.84	-0.746	-0.473	-0.622
LOC_Os01g04720.2	vacuolar protein sorting-associating protein 4B, putative, expressed	0.613476	0.0753812	0.0221293	0.839	0.7	0.586	0.464	1.78	2.44	0.706	-0.608	1.17	-1.27
LOC_Os01g04800.1	expressed protein	0.0898111	0.342039	0.39922	0.732	0.795	0.846	0.685	0.362	-0.319	-0.503	-0.18	0.182	0.501
LOC_Os01g04814.4	retrotransposon protein, putative, unclassified, expressed	0.730821	0.829637	0.748152	0.848	0.841	0.879	-0.037	0.0231	0.0345	0.0421	-0.0179	0.00515	-0.0293
LOC_Os01g04830.1	TP53RK-binding protein, putative, expressed	0.223594	0.846903	0.5635	0.788	0.842	0.864	1.54	-0.234	-0.706	-1.39	0.383	0.149	0.855
LOC_Os01g04880.1	peptide transporter PTR2, putative, expressed	0.000271458	0.000661293	0.00733439	0.109	0.181	0.42	2.96	2.61	1.78	-1.12	-0.776	1.84	0.0599
LOC_Os01g04910.1	expressed protein	0.330432	0.0962114	0.142914	0.809	0.718	0.779	-0.616	-1.11	-0.961	-0.0558	0.439	-0.672	0.289
LOC_Os01g04950.3	expressed protein	0.940671	0.883606	0.290316	0.86	0.844	0.827	-0.0544	-0.107	0.798	0.214	0.266	0.159	-0.639
LOC_Os01g05070.2	expressed protein	0.000291139	0.00342861	0.000541065	0.114	0.383	0.0947	0.576	0.399	0.528	-0.2	-0.0229	0.376	-0.153
LOC_Os01g05130.1	transcription factor X1, putative, expressed	0.314076	0.384332	0.0886397	0.806	0.801	0.74	1.09	0.933	1.94	-0.0963	0.0583	0.991	-0.953
LOC_Os01g05140.1	3-oxo-5-alpha-steroid 4-dehydrogenase, putative, expressed	0.207091	0.445231	0.00267815	0.783	0.809	0.259	-0.244	-0.143	-0.73	-0.0357	-0.136	-0.279	0.451
LOC_Os01g05470.1	expressed protein	0.00154613	0.306325	0.715863	0.296	0.789	0.876	-1.92	-0.469	0.162	1.36	-0.088	-0.557	-0.719
LOC_Os01g05670.1	inner membrane protein, putative, expressed	0.89373	0.938068	0.573968	0.857	0.847	0.865	0.038	-0.0221	-0.161	-0.0743	-0.0142	-0.0363	0.125
LOC_Os01g05694.1	inner membrane protein, putative, expressed	0.641454	0.189872	0.261647	0.841	0.761	0.821	0.304	-0.895	-0.756	-0.641	0.558	-0.337	0.42
LOC_Os01g05800.1	receptor kinase, putative, expressed	0.00194889	0.075191	0.0571068	0.326	0.7	0.698	0.822	0.385	-0.417	-0.625	-0.188	0.197	0.615
LOC_Os01g05800.2	OsFBO1 - F-box and other domain containing protein, expressed	0.16338	0.385928	0.0775457	0.77	0.801	0.728	1.02	0.612	1.33	-0.277	0.129	0.741	-0.594
LOC_Os01g05870.1	aspartyl-tRNA synthetase, putative, expressed	0.445983	0.130001	0.841589	0.824	0.738	0.884	-0.994	2.08	-0.257	1.2	-1.87	0.206	0.463
LOC_Os01g05970.1	splicing factor, arginine/serine-rich, putative, expressed	0.833358	0.439491	0.00914175	0.854	0.808	0.456	-0.0294	0.11	-0.446	-0.0621	-0.201	-0.0915	0.355
LOC_Os01g06020.1	expressed protein	0.201341	0.0169556	0.00532412	0.782	0.57	0.368	-0.311	-0.658	-0.82	-0.136	0.21	-0.447	0.373
LOC_Os01g06290.4	OsSCP1 - Putative Serine Carboxypeptidase homologue, expressed	0.192732	0.20261	0.146297	0.779	0.765	0.781	-1.96	-1.92	-2.22	0.439	0.392	-1.52	0.692
LOC_Os01g06470.1	glutaryl-CoA dehydrogenase, mitochondrial precursor, putative, expressed	0.00209426	0.605773	0.963626	0.336	0.824	0.891	-3.69	-0.465	0.0408	2.66	-0.563	-1.03	-1.07
LOC_Os01g06490.2	DEAD-box ATP-dependent RNA helicase, putative, expressed	0.148954	0.162362	0.22392	0.764	0.752	0.811	1.61	1.55	1.33	-0.486	-0.428	1.12	-0.209
LOC_Os01g06600.2	expressed protein	0.212674	0.284345	0.0758282	0.785	0.785	0.726	0.201	0.171	0.301	-0.0331	-0.00267	0.168	-0.133
LOC_Os01g07080.1	staphylococcal nuclease homologue, putative, expressed	0.0627931	0.00440548	0.0971903	0.706	0.414	0.748	0.463	0.821	0.404	-0.0413	-0.399	0.422	0.0177
LOC_Os01g07100.1	expressed protein	0.27454	0.545324	0.56966	0.799	0.819	0.865	-0.426	-0.23	-0.216	0.208	0.0121	-0.218	-0.00193
LOC_Os01g07200.1	hydrolase, alpha/beta fold family protein, putative, expressed	0.0766716	0.595231	0.937186	0.721	0.824	0.89	0.585	-0.162	-0.0238	-0.485	0.262	0.1	0.124
LOC_Os01g07382.1	expressed protein	0.000136626	0.000481241	0.0173761	0.067	0.153	0.553	0.592	0.499	0.274	-0.251	-0.158	0.341	0.0671
LOC_Os01g07420.1	embryo-specific 3, putative, expressed	0.0742207	0.119025	0.0371386	0.718	0.732	0.651	0.696	0.594	0.842	-0.163	-0.0612	0.533	-0.309
LOC_Os01g07750.1	NADH-cytochrome b5 reductase, putative, expressed	0.732122	0.316173	0.14402	0.848	0.79	0.78	0.343	1.03	1.55	0.389	-0.299	0.732	-0.822
LOC_Os01g07780.1	aminotransferase, classes I and II, domain containing protein, expressed	0.802654	0.0252664	0.0100396	0.852	0.609	0.47	-0.273	-2.83	-3.42	-1.36	1.2	-1.63	1.79
LOC_Os01g07910.1	expressed protein	0.443087	0.456883	0.399375	0.823	0.81	0.846	-0.163	0.158	-0.18	0.117	-0.204	-0.0462	0.134
LOC_Os01g08270.4	ATP synthase subunit alpha, mitochondrial, putative, expressed	0.0765299	0.0130067	0.839753	0.721	0.542	0.884	-0.309	-0.476	0.0323	0.121	0.288	-0.188	-0.221
LOC_Os01g08280.1	ras-related protein, putative, expressed	0.447926	0.906083	0.343096	0.824	0.845	0.837	0.331	-0.0506	0.417	-0.156	0.225	0.174	-0.243
LOC_Os01g08350.1	retrotransposon protein, putative, unclassified, expressed	0.865411	0.0172832	0.548606	0.856	0.572	0.863	-0.216	3.59	-0.772	0.868	-2.94	0.652	1.42
LOC_Os01g08450.1	MAR-binding filament-like protein 1, putative, expressed	0.322649	0.326093	0.592452	0.807	0.792	0.867	-0.132	-0.131	-0.0701	0.0488	0.0478	-0.0834	-0.0132
LOC_Os01g08470.1	DnaK family protein, putative, expressed	0.201919	0.0892127	0.266124	0.782	0.712	0.822	-0.564	-0.779	-0.486	0.107	0.322	-0.457	0.0285
LOC_Os01g08510.1	frigida, putative, expressed	0.030259	0.904118	0.00543202	0.646	0.845	0.372	0.19	0.0092	-0.269	-0.207	-0.0265	-0.0173	0.251
LOC_Os01g08560.2	aquaporin protein, putative, expressed	0.0245365	0.907987	0.669977	0.627	0.845	0.873	0.312	-0.0138	0.0511	-0.224	0.101	0.0873	0.0362
LOC_Os01g08580.1	PHD-finger domain containing protein, putative, expressed	0.0758682	0.0439479	0.743051	0.72	0.658	0.878	-1.2	-1.4	-0.203	0.501	0.702	-0.703	-0.5
LOC_Os01g08660.1	SSRP1-like FACT complex subunit, putative, expressed	0.879123	0.921362	0.17091	0.856	0.846	0.792	0.128	-0.0833	1.22	0.188	0.399	0.316	-0.903
LOC_Os01g08820.1	transferase family protein, putative, expressed	0.193281	0.29669	0.19112	0.78	0.787	0.8	0.656	0.517	-0.66	-0.528	-0.389	0.128	0.788
LOC_Os01g08970.1	AGC_AGC_other_NDRh_TRCd.1 - ACG kinases include homologs to PKA, PKG and PKC, expressed	0.217587	0.0232692	0.0861362	0.786	0.601	0.738	-0.262	0.538	0.38	0.426	-0.374	0.164	-0.216
LOC_Os01g09010.1	60S acidic ribosomal protein, putative, expressed	0.452546	0.444263	0.204114	0.824	0.809	0.805	-0.392	-0.399	-0.682	0.0233	0.0308	-0.368	0.314
LOC_Os01g09200.1	HAD superfamily phosphatase, putative, expressed	0.00113807	0.259482	0.0324597	0.256	0.78	0.635	-0.788	0.204	0.427	0.749	-0.243	-0.0395	-0.466
LOC_Os01g09510.1	mitochondrial-processing peptidase subunit alpha, mitochondrial precursor, putative, expressed	0.575059	0.381027	0.00532912	0.836	0.8	0.369	-0.147	-0.233	-0.918	-0.177	-0.0916	-0.325	0.594
LOC_Os01g09540.1	6-phosphofructokinase, putative, expressed	0.824603	0.00293684	0.00973703	0.853	0.363	0.466	-0.0294	-0.518	-0.42	-0.212	0.276	-0.242	0.178
LOC_Os01g09560.1	ZOS1-04 - C2H2 zinc finger protein, expressed	0.0345133	0.984681	0.381979	0.658	0.85	0.843	0.322	0.00256	0.119	-0.211	0.108	0.111	-0.00828
LOC_Os01g09570.1	harpin-induced protein 1 domain containing protein, expressed	0.000194543	0.00150386	0.77446	0.0871	0.278	0.88	0.775	0.579	-0.0383	-0.446	-0.25	0.329	0.367
LOC_Os01g09850.3	DEAD-box ATP-dependent RNA helicase, putative, expressed	0.901963	0.731024	0.849561	0.858	0.834	0.885	-0.124	0.347	-0.191	0.132	-0.339	0.008	0.199
LOC_Os01g09880.1	expressed protein	0.27633	0.0756621	0.68956	0.799	0.701	0.875	0.108	-0.187	0.0384	-0.118	0.177	-0.0101	-0.0485
LOC_Os01g10050.2	POLD3 - Putative DNA polymerase delta complex subunit, expressed	0.465597	0.689061	0.170914	0.826	0.831	0.792	-0.324	-0.176	-0.631	0.0409	-0.107	-0.283	0.349
LOC_Os01g10340.1	WD domain, G-beta repeat domain containing protein, expressed	0.736796	0.249306	0.259585	0.848	0.777	0.821	-0.28	0.994	0.971	0.701	-0.573	0.421	-0.55
LOC_Os01g10690.1	carnitine racemase like protein, putative, expressed	0.0448088	0.226125	0.272788	0.68	0.772	0.824	2.21	1.23	1.11	-1.07	-0.0959	1.14	0.0284
LOC_Os01g10790.1	phosphoenolpyruvate carboxylase, putative, expressed	0.00599659	0.940991	0.0016744	0.473	0.847	0.202	0.542	-0.0116	0.668	-0.242	0.311	0.3	-0.369
LOC_Os01g10830.1	SOUL heme-binding protein, putative, expressed	0.000174388	0.000964461	0.00424494	0.0806	0.224	0.332	0.691	0.544	0.431	-0.275	-0.128	0.416	-0.0141
LOC_Os01g11054.1	ATP-dependent RNA helicase, putative, expressed	0.740963	0.450845	0.79824	0.848	0.809	0.882	-0.306	-0.706	-0.236	-0.00637	0.394	-0.312	-0.076
LOC_Os01g11230.1	sodium/calcium exchanger protein, putative, expressed	0.149686	0.80322	0.0853375	0.765	0.839	0.737	1.16	-0.19	1.43	-0.563	0.79	0.6	-0.826
LOC_Os01g11370.1	bromodomain containing protein, expressed	0.372188	0.00954371	0.0151059	0.815	0.507	0.532	0.458	1.59	1.45	0.418	-0.715	0.876	-0.578
LOC_Os01g11414.2	GDSL-like lipase/acylhydrolase, putative, expressed	0.405535	0.107452	0.297021	0.819	0.725	0.829	0.415	-0.85	-0.527	-0.655	0.609	-0.24	0.286
LOC_Os01g11580.1	GDSL-like lipase/acylhydrolase, putative, expressed	0.112274	0.144112	0.535887	0.747	0.745	0.862	-1.75	-1.6	-0.643	0.756	0.597	-0.998	-0.356
LOC_Os01g11650.2	receptor-like protein kinase, putative, expressed	0.261437	0.123108	0.0919429	0.796	0.734	0.743	1.14	-1.62	1.8	-0.815	1.95	0.33	-1.47
LOC_Os01g11730.1	reticulon domain containing protein, putative, expressed	0.0636972	0.112607	0.914761	0.707	0.728	0.889	-0.472	-0.392	-0.0246	0.249	0.17	-0.222	-0.198
LOC_Os01g12430.1	AAA-type ATPase family protein, putative, expressed	0.767059	0.206665	0.677705	0.85	0.766	0.874	0.403	-1.79	-0.567	-0.893	1.31	-0.49	0.0772
LOC_Os01g12650.1	eukaryotic translation initiation factor 3 subunit E-interacting protein, putative, expressed	0.0654595	0.206077	0.41439	0.709	0.766	0.848	0.316	0.206	0.129	-0.153	-0.043	0.163	0.0336
LOC_Os01g12660.1	VHS and GAT domain containing protein, expressed	0.90676	0.991773	0.200485	0.858	0.85	0.804	0.0711	0.00625	0.814	0.152	0.217	0.223	-0.591
LOC_Os01g12870.1	60S acidic ribosomal protein, putative, expressed	0.683048	0.797522	0.27792	0.844	0.839	0.825	0.292	-0.183	0.798	-0.0649	0.409	0.227	-0.571
LOC_Os01g12880.1	KH domain containing protein, putative, expressed	0.705644	0.532638	0.536457	0.846	0.818	0.862	0.459	-0.764	-0.757	-0.724	0.499	-0.265	0.491
LOC_Os01g13080.1	metallo-beta-lactamase family protein, putative, expressed	0.842997	0.139263	0.0270728	0.854	0.742	0.612	-0.0421	-0.334	-0.543	-0.188	0.105	-0.23	0.313
LOC_Os01g13100.3	abscisic acid insensitive 8, putative, expressed	0.0648665	0.00609567	0.00346291	0.709	0.454	0.299	-0.218	-0.368	-0.406	-0.03	0.12	-0.248	0.158
LOC_Os01g13150.1	expressed protein	0.706139	0.431479	0.0911929	0.846	0.807	0.743	0.244	0.516	1.18	0.242	-0.0303	0.486	-0.698
LOC_Os01g13200.1	SOUL heme-binding protein, putative, expressed	0.0248354	0.0127902	0.0362755	0.628	0.54	0.648	-0.454	-0.523	0.416	0.314	0.382	-0.14	-0.556
LOC_Os01g13390.1	importin-alpha re-exporter, putative, expressed	0.150652	0.0498927	0.082556	0.765	0.669	0.734	-0.968	-1.39	-1.2	0.0771	0.502	-0.891	0.312
LOC_Os01g13420.1	helix-loop-helix DNA-binding domain containing protein, expressed	0.190013	0.0492391	0.350597	0.779	0.668	0.839	1.93	3.08	1.34	-0.34	-1.5	1.59	0.248
LOC_Os01g13430.1	KH domain containing protein, putative, expressed	0.653034	0.232047	0.250655	0.842	0.773	0.818	0.142	-0.391	-0.374	-0.298	0.235	-0.156	0.219
LOC_Os01g13460.1	phosphoglycerate mutase, putative, expressed	0.036548	0.57228	0.899129	0.663	0.822	0.888	-3.14	-0.752	-0.167	2.13	-0.263	-1.01	-0.848
LOC_Os01g13470.1	DUF250 domain containing protein, putative, expressed	0.0407981	0.00919151	0.235477	0.672	0.503	0.814	-0.892	-1.23	-0.476	0.242	0.582	-0.65	-0.174
LOC_Os01g13570.2	dehydrogenase, putative, expressed	0.124222	0.168835	0.405317	0.753	0.754	0.847	2.41	2.13	1.24	-0.965	-0.682	1.45	0.203
LOC_Os01g13770.3	Cupin domain containing protein, expressed	0.254005	0.015014	0.00085209	0.795	0.557	0.133	-0.234	-0.574	-0.933	-0.201	0.138	-0.435	0.498
LOC_Os01g14580.1	5-nucleotidase domain-containing protein, putative, expressed	0.717042	0.437154	0.525859	0.847	0.808	0.861	0.432	-0.939	0.762	-0.368	1	0.0638	-0.698
LOC_Os01g14670.1	ribosomal protein L3, putative, expressed	0.174367	0.433555	0.378438	0.774	0.807	0.843	-1.14	-0.633	0.715	0.873	0.369	-0.264	-0.978
LOC_Os01g14810.3	lipase, putative, expressed	0.24139	0.168441	0.249531	0.792	0.754	0.818	-1.09	-1.3	-1.07	0.225	0.436	-0.866	0.205
LOC_Os01g14830.1	miro, putative, expressed	0.00254455	0.000114306	0.00308259	0.362	0.0576	0.281	-0.791	-1.23	-0.766	0.0932	0.535	-0.697	0.0689
LOC_Os01g15000.1	pectinesterase, putative, expressed	0.00148989	0.302404	0.0686574	0.291	0.788	0.716	8.19	2	3.78	-4.7	1.49	3.49	-0.288
LOC_Os01g15010.1	ribosomal L18p/L5e family protein, putative, expressed	0.00661535	0.240338	0.36651	0.485	0.775	0.841	0.317	-0.114	0.0862	-0.244	0.186	0.0722	-0.0139
LOC_Os01g15039.1	zinc finger C-x8-C-x5-C-x3-H type family protein, expressed	0.256537	0.0169619	0.0153798	0.795	0.57	0.535	0.196	-0.471	-0.48	-0.384	0.282	-0.189	0.291
LOC_Os01g15290.2	zinc finger C-x8-C-x5-C-x3-H type family protein, expressed	0.0653789	0.33045	0.554147	0.709	0.793	0.864	0.693	0.34	0.203	-0.384	-0.0312	0.309	0.106
LOC_Os01g15350.1	PUR ALPHA-1, putative, expressed	0.440496	0.309232	0.0839659	0.823	0.789	0.735	-0.879	-1.17	-2.11	-0.162	0.132	-1.04	1.07
LOC_Os01g15460.3	peroxidase precursor, putative, expressed	0.677717	0.11827	0.811117	0.844	0.732	0.883	-0.37	-1.48	-0.212	-0.147	0.968	-0.517	-0.305
LOC_Os01g15600.1	mitochondrial carrier protein, putative, expressed	0.0101301	0.00407298	0.146014	0.535	0.404	0.781	-1.02	-1.2	-0.5	0.338	0.518	-0.678	-0.178
LOC_Os01g15830.1	RNA binding protein, putative, expressed	0.270706	0.0978668	0.288186	0.798	0.719	0.827	-0.569	-0.895	-0.547	0.0663	0.392	-0.503	0.0446
LOC_Os01g16040.1	la domain containing protein, putative, expressed	0.120297	0.973772	0.0420095	0.751	0.849	0.665	0.258	0.0051	-0.356	-0.282	-0.0283	-0.0232	0.333
LOC_Os01g16090.1	peroxiredoxin, putative, expressed	0.00753444	0.000677331	0.01218	0.5	0.184	0.5	-0.403	-0.593	-0.367	0.0619	0.252	-0.341	0.0268
LOC_Os01g16110.2	Sad1 / UNC-like C-terminal domain containing protein, putative, expressed	0.101138	0.917541	0.45501	0.74	0.846	0.853	-0.244	0.0143	-0.105	0.161	-0.0978	-0.0836	0.0209
LOC_Os01g16152.1	DNA gyrase subunit B, chloroplast/mitochondrial precursor, putative, expressed	0.607178	0.127048	0.143401	0.839	0.736	0.78	0.279	0.881	-0.84	-0.199	-0.8	0.08	0.92
LOC_Os01g16220.1	expressed protein	0.516595	0.680025	0.311312	0.831	0.83	0.832	-0.198	-0.125	-0.314	0.0386	-0.0344	-0.159	0.155
LOC_Os01g16290.1	cysteine proteinase inhibitor precursor protein, putative, expressed	0.524892	0.797806	0.634555	0.832	0.839	0.87	0.218	-0.0869	-0.162	-0.226	0.0791	-0.00778	0.154
LOC_Os01g16340.1	peroxidase precursor, putative, expressed	0.00425268	0.000602676	0.00757917	0.429	0.172	0.426	-1.64	-2.22	-1.48	0.305	0.884	-1.33	0.146
LOC_Os01g16430.1	glutamyl-tRNA synthetase, cytoplasmic, putative, expressed	0.297399	0.890546	0.253921	0.803	0.844	0.819	-1.03	-0.132	1.13	1.02	0.125	-0.00676	-1.14
LOC_Os01g16450.1	OsClp1 - Putative Clp protease homologue, expressed	0.963734	0.505335	0.39008	0.861	0.815	0.845	0.0269	-0.398	-0.519	-0.249	0.176	-0.223	0.296
LOC_Os01g16520.1	ribosomal protein L7Ae, putative, expressed	0.160953	0.150795	0.0183404	0.769	0.747	0.56	0.841	0.864	1.58	-0.02	-0.0434	0.821	-0.757
LOC_Os01g16530.1	dehydrogenase, putative, expressed	0.0535188	0.0740804	0.55038	0.694	0.699	0.863	0.362	0.329	0.101	-0.164	-0.131	0.198	0.0968
LOC_Os01g16890.1	outer mitochondrial membrane porin, putative, expressed	0.716132	0.308262	0.0568607	0.847	0.789	0.698	-0.123	-0.353	-0.712	-0.174	0.056	-0.297	0.415
LOC_Os01g16900.1	pyruvate kinase, putative, expressed	0.124011	0.874504	0.773514	0.753	0.843	0.88	0.211	0.0203	0.037	-0.144	0.0468	0.0671	0.0301
LOC_Os01g16910.1	plastid-specific 50S ribosomal protein 5, chloroplast precursor, putative, expressed	0.373127	0.264886	0.910957	0.815	0.781	0.888	-0.268	-0.34	-0.0329	0.108	0.18	-0.16	-0.127
LOC_Os01g16960.1	magnesium-protoporphyrin IX monomethyl ester cyclase,chloroplast precursor, putative, expressed	0.0164146	0.0168112	0.170742	0.587	0.569	0.792	0.375	0.374	0.19	-0.141	-0.139	0.235	0.0444
LOC_Os01g17150.1	OsCam3 - Calmodulin, expressed	0.0815687	0.106132	0.00215083	0.725	0.724	0.231	-0.422	-0.386	-0.909	-0.0076	-0.043	-0.429	0.48
LOC_Os01g17170.1	PPR repeat domain containing protein, putative, expressed	0.0115017	0.0882758	0.0873072	0.549	0.712	0.739	0.258	0.156	-0.157	-0.193	-0.0918	0.0643	0.221
LOC_Os01g17190.1	coatomer subunit beta-1, putative, expressed	0.94343	0.0355912	0.0727421	0.86	0.64	0.722	-0.0937	3.16	2.6	1.51	-1.74	1.42	-1.19
LOC_Os01g17320.1	tubulin/FtsZ domain containing protein, putative, expressed	0.344325	0.262542	0.368292	0.811	0.78	0.841	-1.09	-1.3	1.03	0.749	0.964	-0.34	-1.37
LOC_Os01g17430.1	bacterial transferase hexapeptide domain containing protein, expressed	0.237681	0.601567	0.475961	0.791	0.824	0.856	-0.934	-0.4	0.549	0.738	0.204	-0.196	-0.746
LOC_Os01g18050.1	Cupin domain containing protein, expressed	0.884994	0.997553	0.174179	0.857	0.85	0.794	-0.043	-0.000911	0.426	0.138	0.0964	0.0955	-0.33
LOC_Os01g18070.1	peptidyl-prolyl cis-trans isomerase, putative, expressed	0.0533673	0.000250524	0.000410773	0.694	0.103	0.0757	-0.253	-0.657	-0.614	-0.128	0.276	-0.381	0.233
LOC_Os01g18170.1	aspartic proteinase oryzasin-1 precursor, putative, expressed	0.561215	0.407498	0.43161	0.835	0.804	0.85	-0.31	-0.446	0.423	0.227	0.363	-0.0833	-0.506
LOC_Os01g18210.1	aminotransferase, putative, expressed	0.0405463	0.00213338	0.0199646	0.672	0.322	0.572	-0.747	-1.32	-0.882	0.00895	0.586	-0.739	0.143
LOC_Os01g18630.2	peroxidase precursor, putative, expressed	0.812491	0.833925	0.261164	0.853	0.841	0.821	-0.249	-0.22	1.22	0.437	0.408	0.188	-1.03
LOC_Os01g18640.2	transposon protein, putative, unclassified, expressed	0.240816	0.152189	0.509939	0.792	0.748	0.859	-0.36	-0.448	-0.197	0.109	0.197	-0.251	-0.0545
LOC_Os01g19020.1	nodal modulator 1 precursor, putative, expressed	0.133631	0.429229	0.0305941	0.758	0.807	0.628	-0.668	-0.336	1.04	0.676	0.344	0.00814	-1.03
LOC_Os01g19050.1	universal stress protein domain containing protein, putative, expressed	0.280623	0.756458	0.934555	0.8	0.836	0.89	-1.53	-0.427	0.113	1.07	-0.0345	-0.461	-0.574
LOC_Os01g19470.1	pectinesterase, putative, expressed	0.186302	0.0684627	0.253377	0.777	0.693	0.819	0.167	-0.241	0.142	-0.15	0.258	0.017	-0.125
LOC_Os01g19820.4	homeodomain, putative, expressed	0.0278348	0.530836	0.0286342	0.639	0.818	0.619	0.459	0.114	0.456	-0.201	0.143	0.257	-0.198
LOC_Os01g21034.1	preprotein translocase subunit secA, chloroplast precursor, putative, expressed	0.819873	0.315142	0.0144831	0.853	0.79	0.526	-0.0232	0.105	-0.298	-0.0307	-0.159	-0.0539	0.244
LOC_Os01g21590.1	peroxidase precursor, putative, expressed	0.635937	0.218548	0.0794947	0.841	0.77	0.73	0.148	0.399	0.596	0.138	-0.113	0.286	-0.31
LOC_Os01g21820.1	peroxidase precursor, putative, expressed	0.269998	0.044707	0.00269826	0.798	0.66	0.26	-0.136	-0.27	-0.472	-0.0833	0.0502	-0.22	0.253
LOC_Os01g22230.1	40S ribosomal protein S27a, putative, expressed	0.977208	0.139938	0.958057	0.862	0.743	0.891	0.0101	-0.555	0.0185	-0.142	0.423	-0.131	-0.15
LOC_Os01g22370.1	dihydrolipoyl dehydrogenase, putative, expressed	0.631335	0.950695	0.35383	0.841	0.848	0.839	-0.548	0.0701	1.08	0.698	0.0799	0.15	-0.927
LOC_Os01g22490.1	miro, putative, expressed	0.320182	0.6548	0.318603	0.807	0.828	0.833	0.632	-0.278	-0.634	-0.702	0.208	-0.07	0.564
LOC_Os01g23610.1	rossmann fold nucleotide-binding protein involved in DNA uptake, putative, expressed	0.00348786	0.00168641	0.000496139	0.403	0.292	0.0885	0.443	0.498	-0.596	-0.357	-0.411	0.0861	0.682
LOC_Os01g23620.1	OsPDIL2-2 protein disulfide isomerase PDIL2-2, expressed	0.839443	0.0333808	0.21453	0.854	0.635	0.808	0.024	-0.287	0.153	-0.0515	0.26	-0.0275	-0.181
LOC_Os01g23680.3	AMP-binding enzyme, putative, expressed	0.932198	0.723137	0.331418	0.859	0.834	0.835	-0.039	0.163	-0.457	-0.0444	-0.246	-0.0834	0.374
LOC_Os01g23740.2	jacalin-like lectin domain containing protein, expressed	0.562561	0.162832	0.00712214	0.835	0.752	0.416	0.0623	0.157	-0.357	-0.0967	-0.192	-0.0344	0.323
LOC_Os01g24030.2	Ser/Thr protein phosphatase family protein, putative, expressed	0.0118817	0.0470502	0.104288	0.553	0.664	0.754	0.471	0.345	0.272	-0.199	-0.0733	0.272	0.000431
LOC_Os01g24710.3	exocyst complex component 6, putative, expressed	0.291905	0.0266091	0.421725	0.802	0.614	0.849	0.502	-1.18	-0.377	-0.766	0.918	-0.265	0.113
LOC_Os01g24750.1	multidrug resistance-associated protein, putative, expressed	0.500557	0.768805	0.298754	0.829	0.837	0.829	0.801	-0.346	1.26	-0.373	0.774	0.428	-0.83
LOC_Os01g24950.2	ferredoxin--nitrite reductase, putative, expressed	0.660286	0.223318	0.451326	0.843	0.771	0.853	-0.525	-1.51	-0.91	-0.211	0.774	-0.737	0.173
LOC_Os01g25386.1	tetratricopeptide repeat domain containing protein, expressed	0.872308	0.595684	0.584787	0.856	0.824	0.866	-0.192	0.637	0.656	0.467	-0.362	0.275	-0.381
LOC_Os01g25484.3	40S ribosomal protein S4, putative, expressed	0.410242	0.0933437	0.461657	0.819	0.716	0.854	0.346	0.75	-0.308	-0.149	-0.553	0.197	0.505
LOC_Os01g25600.1	respiratory burst oxidase, putative, expressed	0.478274	0.298434	0.0394035	0.827	0.787	0.658	-0.276	-0.411	-0.895	-0.12	0.0156	-0.395	0.499
LOC_Os01g25610.1	exportin 1, putative, expressed	0.464916	0.261579	0.0185406	0.826	0.78	0.562	-0.105	-0.165	-0.395	-0.061	-0.00101	-0.166	0.228
LOC_Os01g25820.1	transposon protein, putative, CACTA, En/Spm sub-class, expressed	0.620555	0.0814567	0.203702	0.84	0.706	0.805	0.181	-0.691	-0.483	-0.429	0.442	-0.248	0.235
LOC_Os01g26160.2	chromatin-remodeling complex ATPase chain, putative, expressed	0.0936184	0.673549	0.21879	0.735	0.83	0.809	-0.523	-0.122	0.369	0.454	0.0528	-0.0689	-0.438
LOC_Os01g26940.1	cullin, putative, expressed	0.000250138	0.000827999	0.00161422	0.103	0.206	0.198	-3.22	-2.72	-2.46	1.12	0.621	-2.1	0.362
LOC_Os01g27040.1	glutathione S-transferase, putative, expressed	0.134021	0.066078	0.575807	0.758	0.691	0.866	0.141	0.179	-0.0498	-0.0735	-0.111	0.0675	0.117
LOC_Os01g27150.2	tRNA synthetases class II domain containing protein, expressed	0.344759	0.576553	0.019259	0.811	0.822	0.567	0.467	0.272	1.33	0.0497	0.245	0.517	-0.812
LOC_Os01g27210.1	GTPase of unknown function domain containing protein, putative, expressed	0.670388	0.0445102	0.42459	0.843	0.659	0.849	-0.355	-1.88	-0.674	-0.372	1.15	-0.726	-0.0522
LOC_Os01g27520.1	bifunctional 3-dehydroquinate dehydratase/shikimate dehydrogenase,chloroplast precursor, putative, expressed	0.0584338	0.682269	0.754799	0.701	0.831	0.879	-0.304	0.0594	-0.0452	0.231	-0.132	-0.0724	-0.0271
LOC_Os01g27730.1	cyclin-L1-1, putative, expressed	0.287356	0.364534	0.12705	0.801	0.798	0.77	-0.663	-0.56	-0.985	0.111	0.00805	-0.552	0.433
LOC_Os01g27750.1	CRS2-associated factor 1, chloroplast precursor, putative, expressed	0.235577	0.0168078	0.0654338	0.791	0.569	0.712	-0.269	-0.618	-0.443	-0.0635	0.285	-0.333	0.111
LOC_Os01g27940.1	expressed protein	0.624312	0.0399049	0.611764	0.84	0.65	0.869	-0.576	2.72	0.598	1.26	-2.04	0.686	0.0879
LOC_Os01g31110.1	retrotransposon protein, putative, unclassified	0.850874	0.769449	0.129682	0.855	0.837	0.772	0.131	0.204	1.13	0.235	0.161	0.366	-0.761
LOC_Os01g31220.2	tyrosyl-tRNA synthetase, putative, expressed	0.00870041	0.0280375	0.00242694	0.517	0.619	0.247	1.05	0.821	1.3	-0.254	-0.0284	0.793	-0.511
LOC_Os01g31240.1	oxygen-evolving enhancer protein 1, chloroplast precursor, putative, expressed	0.211167	0.220877	0.836554	0.785	0.77	0.884	2.71	2.65	-0.428	-1.48	-1.42	1.23	1.66
LOC_Os01g31610.1	thiamine pyrophosphate enzyme, C-terminal TPP binding domain containing protein, expressed	0.219692	0.513812	0.800697	0.787	0.816	0.882	0.236	0.122	-0.0465	-0.158	-0.0439	0.0777	0.124
LOC_Os01g31690.1	expressed protein	0.209388	0.15515	0.00797637	0.784	0.749	0.434	-0.123	-0.141	-0.306	-0.0198	-0.00174	-0.142	0.164
LOC_Os01g32080.2	expressed protein	0.00634946	0.00143765	0.194881	0.48	0.272	0.802	-0.992	-1.27	-0.394	0.329	0.603	-0.663	-0.269
LOC_Os01g32130.1	OsClp2 - Putative Clp protease homologue, expressed	0.0664905	0.159614	0.996017	0.71	0.751	0.893	-1.08	-0.796	-0.00267	0.612	0.326	-0.47	-0.468
LOC_Os01g32300.2	Os1bglu1 - beta-mannosidase/glucosidase homologue, expressed	0.00723338	0.180815	0.916454	0.495	0.759	0.889	-1.77	-0.745	0.0555	1.15	0.131	-0.614	-0.67
LOC_Os01g32350.1	STE_MEK_ste7_MAP2K.2 - STE kinases include homologs to sterile 7, sterile 11 and sterile 20 from yeast, expressed	0.857458	0.362864	0.707868	0.855	0.798	0.876	-0.192	0.996	0.402	0.494	-0.694	0.301	-0.101
LOC_Os01g32364.1	TATA binding protein-associated factor, putative, expressed	0.683093	0.105179	0.456964	0.844	0.724	0.853	-0.61	-2.6	-1.12	-0.473	1.52	-1.08	0.0401
LOC_Os01g32660.1	universal stress protein domain containing protein, putative, expressed	0.270262	0.573493	0.394904	0.798	0.822	0.845	-0.178	-0.0886	0.135	0.145	0.0558	-0.0328	-0.168
LOC_Os01g32750.1	expressed protein	0.533794	0.492799	0.564215	0.832	0.814	0.864	-0.878	-0.971	0.813	0.619	0.712	-0.259	-1.07
LOC_Os01g32780.1	mitochondrial carrier protein, putative, expressed	0.484118	0.622181	0.0747778	0.828	0.826	0.725	0.723	0.506	1.99	0.0823	0.3	0.805	-1.19
LOC_Os01g32790.1	heat shock protein DnaJ, putative, expressed	0.0357556	0.0195597	0.619126	0.661	0.584	0.869	0.459	0.527	-0.096	-0.236	-0.304	0.222	0.318
LOC_Os01g32980.1	G-patch domain containing protein, expressed	0.328101	0.160982	0.989291	0.808	0.751	0.892	-1.06	-1.57	-0.0142	0.402	0.909	-0.663	-0.649
LOC_Os01g33800.1	BAH domain containing protein, expressed	0.0274295	0.130071	0.0540519	0.638	0.738	0.692	-1.7	-1.08	-1.43	0.646	0.0262	-1.05	0.38
LOC_Os01g34190.1	NAD dependent epimerase/dehydratase family protein, putative, expressed	0.0149329	0.0451957	0.864512	0.578	0.66	0.886	-1.91	1.48	0.112	1.83	-1.56	-0.0792	-0.191
LOC_Os01g34330.2	OsGrx_S15.1 - glutaredoxin subgroup II, expressed	0.640289	0.228046	0.241214	0.841	0.772	0.816	-0.472	1.26	1.22	0.975	-0.758	0.503	-0.72
LOC_Os01g34480.1	DNA-damage-repair/toleration protein DRT102, putative, expressed	0.000284732	0.0920413	0.00168107	0.112	0.715	0.202	-0.55	0.182	0.425	0.564	-0.168	0.0145	-0.411
LOC_Os01g34620.7	peroxidase precursor, putative, expressed	0.631808	0.081378	0.0569679	0.841	0.706	0.698	-0.0641	-0.253	-0.281	-0.0855	0.103	-0.15	0.132
LOC_Os01g36090.1	PPR repeat domain containing protein, putative, expressed	0.00143055	0.29158	0.00374122	0.286	0.786	0.311	-0.507	-0.126	-0.435	0.24	-0.141	-0.267	0.168
LOC_Os01g36240.1	DEAD-box ATP-dependent RNA helicase 40, putative, expressed	0.809186	0.954519	0.182921	0.852	0.848	0.797	0.0932	-0.022	0.54	0.0597	0.175	0.153	-0.387
LOC_Os01g36600.1	DEAD-box ATP-dependent RNA helicase, putative, expressed	0.0147919	0.00760982	0.344828	0.577	0.481	0.838	1.75	1.99	-0.582	-0.96	-1.2	0.789	1.37
LOC_Os01g36860.2	expressed protein	0.0298491	0.0442043	0.00615389	0.645	0.659	0.392	-0.343	-0.311	-0.472	0.0613	0.0296	-0.282	0.191
LOC_Os01g36920.2	chaperone protein dnaJ 49, putative, expressed	0.635586	0.674835	0.0597635	0.841	0.83	0.703	-0.0538	-0.0475	0.236	0.0873	0.0811	0.0336	-0.202
LOC_Os01g37480.1	ras-related protein, putative, expressed	0.583548	0.0725507	0.601374	0.837	0.698	0.868	0.097	-0.346	-0.0924	-0.182	0.261	-0.0854	0.00697
LOC_Os01g37560.3	seryl-tRNA synthetase, putative, expressed	0.00722629	0.00558791	0.163561	0.495	0.444	0.789	0.736	0.771	0.325	-0.278	-0.313	0.458	0.133
LOC_Os01g37800.1	hydrolase, putative, expressed	0.12762	0.70196	0.998387	0.755	0.832	0.893	1.69	-0.398	-0.0021	-1.37	0.721	0.322	0.324
LOC_Os01g37837.1	vesicle transport v-SNARE protein, putative, expressed	0.00153986	0.0255341	0.0935666	0.295	0.61	0.745	-0.394	-0.236	-0.166	0.195	0.0371	-0.199	-0.0331
LOC_Os01g37960.1	peptidyl-prolyl isomerase, putative, expressed	0.00160714	0.0215528	0.881322	0.301	0.594	0.887	0.862	0.54	-0.03	-0.519	-0.197	0.343	0.373
LOC_Os01g37980.1	GA18326-PA, putative, expressed	0.00106319	0.000263119	0.000556695	0.248	0.107	0.0967	1.71	2.08	1.88	-0.291	-0.666	1.42	-0.46
LOC_Os01g38229.2	CK1_CaseinKinase_1.2 - CK1 includes the casein kinase 1 kinases, expressed	0.00757485	0.00458488	0.665746	0.501	0.419	0.873	-1.58	-1.73	-0.207	0.701	0.848	-0.878	-0.671
LOC_Os01g38480.3	carbamoyl-phosphate synthase large chain, putative, expressed	0.391354	0.734856	0.612032	0.817	0.834	0.869	-1.62	-0.629	-0.946	0.821	-0.17	-0.799	0.147
LOC_Os01g38950.1	OsFtsH4 FtsH protease, homologue of AtFtsH4, expressed	0.0977734	0.0266312	0.0412426	0.738	0.614	0.663	2.07	2.96	2.66	-0.146	-1.04	1.92	-0.74
LOC_Os01g38970.1	OsFtsH5 FtsH protease, homologue of AtFtsH4, expressed	0.0565771	0.00310444	0.001844	0.698	0.37	0.212	-0.324	-0.59	-0.641	-0.0651	0.201	-0.389	0.253
LOC_Os01g39250.1	harpin-induced protein 1 domain containing protein, expressed	0.0695526	0.79812	0.257469	0.714	0.839	0.82	0.67	-0.0859	0.394	-0.425	0.33	0.244	-0.149
LOC_Os01g39260.1	SEY1, putative, expressed	0.175582	0.486093	0.0688541	0.774	0.813	0.717	0.267	-0.132	0.375	-0.139	0.259	0.127	-0.247
LOC_Os01g39290.1	SCD1, putative, expressed	0.528347	0.940422	0.0792172	0.832	0.847	0.73	-1.16	-0.136	-3.49	-0.0374	-1.06	-1.2	2.3
LOC_Os01g39310.3	expressed protein	0.0562878	0.0380132	0.0424669	0.698	0.646	0.666	-0.726	-0.805	-0.783	0.147	0.227	-0.579	0.204
LOC_Os01g39380.3	SIT4 phosphatase-associated protein domain containing protein, expressed	0.842996	0.851549	0.48402	0.854	0.842	0.856	0.115	-0.109	0.412	-0.0105	0.213	0.105	-0.308
LOC_Os01g40070.1	outer mitochondrial membrane porin, putative, expressed	0.00709642	0.0863129	0.866654	0.493	0.71	0.886	1.66	0.924	0.0831	-0.992	-0.258	0.666	0.583
LOC_Os01g40340.3	S1 RNA binding domain containing protein, expressed	0.0300719	0.0215335	0.258385	0.646	0.594	0.82	-2.84	-3.07	-1.34	1.03	1.26	-1.81	-0.475
LOC_Os01g40570.1	aldehyde dehydrogenase, putative, expressed	0.00317994	0.770151	0.0477667	0.391	0.837	0.679	0.628	0.0477	0.362	-0.368	0.212	0.259	-0.103
LOC_Os01g40640.1	ribosomal protein L25, putative, expressed	0.00469939	0.00306215	0.00338551	0.442	0.368	0.296	-1.87	-2.01	-1.98	0.406	0.546	-1.47	0.513
LOC_Os01g40870.1	aspartic proteinase, putative, expressed	0.00122894	0.000803648	0.0015918	0.266	0.203	0.197	1.59	1.69	1.53	-0.387	-0.49	1.2	-0.325
LOC_Os01g41030.1	mitochondrial ATP synthase g subunit family protein, putative, expressed	0.548695	0.0189439	0.0832114	0.834	0.581	0.734	-0.0942	-0.43	-0.294	-0.11	0.226	-0.205	0.0895
LOC_Os01g41550.1	expressed protein	0.649624	0.0325158	0.937736	0.842	0.632	0.89	0.29	-1.56	0.0496	-0.594	1.25	-0.304	-0.353
LOC_Os01g41610.2	chlorophyll A-B binding protein, putative, expressed	0.734602	0.177069	0.392814	0.848	0.757	0.845	0.398	-1.67	-1.02	-0.97	1.09	-0.572	0.449
LOC_Os01g41640.1	expressed protein	0.0103535	0.130522	0.283275	0.537	0.738	0.826	2.61	1.35	-0.927	-1.85	-0.591	0.759	1.69
LOC_Os01g41710.1	inactive receptor kinase At2g26730 precursor, putative, expressed	0.000637241	0.0426859	0.184671	0.187	0.656	0.798	0.771	0.358	0.218	-0.434	-0.0212	0.337	0.118
LOC_Os01g42010.1	acetyltransferase, GNAT family, putative, expressed	0.40437	0.669555	0.774811	0.819	0.83	0.88	-0.589	0.297	0.199	0.566	-0.32	-0.0234	-0.222
LOC_Os01g42294.1	endonuclease/exonuclease/phosphatase family domain containing protein, expressed	0.478108	0.132917	0.780465	0.827	0.739	0.881	0.0921	-0.205	-0.0358	-0.129	0.168	-0.0373	-0.0015
LOC_Os01g42470.2	expressed protein	0.0417387	0.0566233	0.0113388	0.674	0.679	0.489	-2.34	-2.16	-3.13	0.436	0.252	-1.91	1.22
LOC_Os01g42490.3	protein kinase family protein, putative, expressed	0.000486501	0.000364567	0.000444727	0.158	0.13	0.081	-1.52	-1.58	-1.54	0.36	0.422	-1.16	0.379
LOC_Os01g42520.1	zinc finger C-x8-C-x5-C-x3-H type family protein, expressed	0.0504106	0.507062	0.0661525	0.689	0.815	0.713	0.797	-0.244	0.738	-0.474	0.567	0.323	-0.415
LOC_Os01g42950.1	ribosomal protein L22, putative, expressed	0.484449	0.213049	0.691859	0.828	0.768	0.875	-0.767	1.41	0.431	1.04	-1.14	0.268	-0.163
LOC_Os01g42970.2	PPR repeat domain containing protein, putative, expressed	0.00154353	0.00504977	0.457945	0.296	0.431	0.853	-4.41	-3.64	-0.77	2.21	1.43	-2.2	-1.43
LOC_Os01g42980.4	tetratricopeptide repeat domain containing protein, expressed	0.00586333	0.00569428	0.0128977	0.47	0.446	0.509	-3.43	-3.45	-2.96	0.971	0.989	-2.46	0.5
LOC_Os01g42990.1	psbP-related thylakoid lumenal protein 4, chloroplast precursor, putative, expressed	0.497877	0.30131	0.665061	0.829	0.788	0.873	0.188	-0.291	-0.119	-0.243	0.236	-0.0556	0.0633
LOC_Os01g43030.1	oxidoreductase, aldo/keto reductase family protein, putative, expressed	0.0203758	0.996446	0.095711	0.609	0.85	0.747	0.267	0.000436	0.177	-0.156	0.111	0.111	-0.0659
LOC_Os01g43070.2	DEAD/DEAH box helicase, putative, expressed	0.556698	0.407894	0.059064	0.834	0.804	0.702	-0.108	-0.153	-0.381	-0.0526	-0.00716	-0.16	0.22
LOC_Os01g43090.1	DEAD/DEAH box helicase, putative, expressed	0.0112794	0.0149764	0.474173	0.547	0.557	0.855	-0.26	-0.246	-0.0614	0.118	0.104	-0.142	-0.0803
LOC_Os01g43120.1	OsFtsH9 FtsH protease, homologue of AtFtsH11, expressed	0.0326177	0.0165246	0.155399	0.653	0.567	0.786	0.329	0.383	-0.203	-0.202	-0.256	0.127	0.33
LOC_Os01g43130.1	myosin-Ie, putative, expressed	0.105835	0.000618862	0.455754	0.743	0.175	0.853	-0.372	-1.05	-0.161	-0.025	0.657	-0.397	-0.235
LOC_Os01g43150.1	CAMK_CAMK_like.9 - CAMK includes calcium/calmodulin depedent protein kinases, expressed	0.445159	0.699114	0.458292	0.824	0.832	0.854	0.242	-0.121	0.234	-0.153	0.21	0.0888	-0.146
LOC_Os01g43360.1	kinesin motor domain containing protein, putative, expressed	0.00325933	0.000181265	0.32238	0.394	0.0823	0.834	0.384	0.587	0.102	-0.116	-0.318	0.268	0.166
LOC_Os01g43410.1	adaptin, putative, expressed	0.679754	0.145266	0.774072	0.844	0.745	0.88	0.0504	-0.188	0.0349	-0.076	0.162	-0.0257	-0.0606
LOC_Os01g43580.1	cytochrome P450 72A1, putative, expressed	0.0658035	0.891482	0.940136	0.71	0.844	0.89	-1.02	-0.0689	-0.0379	0.742	-0.214	-0.283	-0.245
LOC_Os01g43630.2	cytochrome P450 72A1, putative, expressed	0.0357743	0.422251	0.352091	0.661	0.806	0.839	-1.46	-0.5	0.584	1.12	0.155	-0.345	-0.929
LOC_Os01g43710.1	50S ribosomal protein L31, putative, expressed	0.0589789	0.0264728	0.00833457	0.702	0.613	0.441	0.739	0.905	1.15	-0.041	-0.207	0.698	-0.45
LOC_Os01g43774.1	transcription factor X1, putative, expressed	0.88782	0.0614506	0.132743	0.857	0.685	0.774	0.039	0.572	0.443	0.225	-0.309	0.264	-0.18
LOC_Os01g44210.1	DEAD-box ATP-dependent RNA helicase, putative, expressed	0.277742	0.400933	0.450613	0.799	0.803	0.853	0.229	-0.175	0.156	-0.176	0.227	0.0526	-0.104
LOC_Os01g44230.1	carbonic anhydrase, chloroplast precursor, putative, expressed	0.000699931	0.000172212	0.00549259	0.198	0.0791	0.373	0.698	0.848	0.504	-0.186	-0.335	0.513	0.00823
LOC_Os01g45190.1	bile acid sodium symporter family protein, putative, expressed	0.872365	0.914467	0.190353	0.856	0.846	0.8	-0.024	-0.016	-0.206	-0.0374	-0.0454	-0.0614	0.144
LOC_Os01g45274.4	plastidic ATP/ADP-transporter, putative, expressed	0.00358615	0.0676642	0.00305412	0.407	0.692	0.279	0.546	0.291	0.56	-0.196	0.0581	0.349	-0.211
LOC_Os01g45750.1	lactate/malate dehydrogenase, putative, expressed	0.130527	0.00645226	0.565145	0.756	0.461	0.865	-0.44	-0.929	-0.158	0.0582	0.547	-0.382	-0.224
LOC_Os01g45910.1	expressed protein	0.60459	0.179256	0.711855	0.838	0.758	0.876	0.401	-1.09	-0.285	-0.644	0.845	-0.243	0.0421
LOC_Os01g46070.1	peptidase S8 and S53, subtilisin, kexin, sedolisin, putative, expressed	0.490216	0.159174	0.338486	0.828	0.751	0.837	-0.863	-1.84	-1.21	-0.116	0.861	-0.979	0.234
LOC_Os01g46400.1	actin-related protein 2/3 complex subunit 2, putative, expressed	0.334775	0.244845	0.702958	0.809	0.776	0.876	-1.07	-1.3	0.412	0.578	0.813	-0.489	-0.902
LOC_Os01g46510.1	dehydrogenase, putative, expressed	0.00158566	0.00476793	0.515776	0.299	0.424	0.86	-0.384	0.321	0.0587	0.383	-0.322	-0.00105	-0.0597
LOC_Os01g46580.1	AMP-binding enzyme, putative, expressed	0.00214177	0.00151112	0.00209622	0.339	0.278	0.228	1.14	1.21	1.15	-0.269	-0.333	0.875	-0.273
LOC_Os01g46610.1	vacuolar ATP synthase subunit E, putative, expressed	0.00281722	0.271046	0.0517482	0.375	0.782	0.688	0.402	-0.117	0.223	-0.275	0.244	0.127	-0.0955
LOC_Os01g46750.4	pyruvate kinase, putative, expressed	0.430244	0.768321	0.0923189	0.822	0.837	0.744	-0.176	0.0648	0.401	0.249	0.00766	0.0725	-0.329
LOC_Os01g46980.1	ribosomal protein L7/L12 C-terminal domain containing protein, expressed	0.0553765	0.10314	0.187741	0.697	0.723	0.799	0.207	0.171	-0.134	-0.146	-0.11	0.0609	0.195
LOC_Os01g47080.1	enoyl-CoA hydratase/isomerase family protein, putative, expressed	0.968219	0.882371	0.719641	0.861	0.844	0.877	0.0628	0.233	0.568	0.153	-0.0174	0.216	-0.352
LOC_Os01g47330.1	aspartic proteinase oryzasin-1 precursor, putative, expressed	0.0150427	0.00642476	0.112875	0.578	0.461	0.761	0.382	0.45	-0.225	-0.23	-0.298	0.152	0.376
LOC_Os01g47350.1	Lg106, putative, expressed	0.0612258	0.262317	0.00580771	0.704	0.78	0.383	-0.522	-0.292	-0.874	0.0997	-0.13	-0.422	0.452
LOC_Os01g47410.1	kinase, pfkB family, putative, expressed	0.0654837	0.0134559	0.000620133	0.709	0.545	0.106	0.871	1.27	2.12	0.194	-0.206	1.06	-1.05
LOC_Os01g47490.5	expressed protein	0.00238954	0.53469	0.147735	0.353	0.818	0.782	-3.16	-0.492	-1.2	1.95	-0.723	-1.21	-0.00943
LOC_Os01g47550.1	expressed protein	0.0227982	0.0350046	0.0281181	0.62	0.639	0.617	-1.86	-1.68	-1.77	0.53	0.353	-1.33	0.443
LOC_Os01g47620.1	vacuolar protein sorting-associated protein 16, putative, expressed	0.0387027	0.00656547	0.298742	0.668	0.463	0.829	0.315	0.456	0.144	-0.086	-0.228	0.229	0.0849
LOC_Os01g47630.2	metallo-beta-lactamase family protein, putative, expressed	0.00919456	0.0457142	0.0174015	0.524	0.661	0.553	2.89	2.03	2.54	-1.02	-0.165	1.87	-0.678
LOC_Os01g47650.1	DDT domain containing protein, putative, expressed	0.818944	0.550222	0.0114024	0.853	0.82	0.49	0.101	0.266	1.35	0.329	0.164	0.431	-0.924
LOC_Os01g47690.2	ubiquitin-conjugating enzyme, putative, expressed	0.336831	0.748468	0.0116888	0.81	0.835	0.494	-0.765	-0.25	2.37	1.1	0.588	0.339	-2.03
LOC_Os01g48180.1	dof zinc finger domain containing protein, putative, expressed	0.126927	0.788386	0.318006	0.754	0.838	0.833	-0.722	-0.119	0.454	0.626	0.0222	-0.0967	-0.551
LOC_Os01g48280.1	ATP synthase protein I related, putative, expressed	0.946323	0.654733	0.0494899	0.86	0.828	0.683	-0.014	-0.0935	-0.458	-0.127	-0.0478	-0.141	0.316
LOC_Os01g48290.1	transcription factor like protein, putative, expressed	0.0146813	0.0339733	0.192837	0.576	0.636	0.801	-1.33	-1.11	-0.626	0.568	0.341	-0.767	-0.141
LOC_Os01g48300.4	peroxiredoxin, putative, expressed	0.409059	0.967167	0.905705	0.819	0.849	0.888	0.969	-0.0474	-0.136	-0.773	0.244	0.196	0.333
LOC_Os01g48320.1	two pore calcium channel protein 1, putative, expressed	0.162312	0.0134019	0.502283	0.769	0.545	0.858	0.805	1.62	-0.37	-0.292	-1.1	0.513	0.883
LOC_Os01g48420.1	ribosomal protein rpS20, putative, expressed	0.511333	0.0791346	0.486511	0.83	0.704	0.857	-0.249	0.72	-0.265	0.301	-0.669	0.0516	0.316
LOC_Os01g48680.2	RNA polymerase III subunit RPC82 family protein, putative, expressed	0.823671	0.0631528	0.597697	0.853	0.687	0.867	-0.225	-2.07	0.536	-0.215	1.63	-0.44	-0.976
LOC_Os01g48690.2	THAP domain-containing protein 4, putative, expressed	0.0428191	0.140435	0.000950747	0.676	0.743	0.143	-0.469	-0.322	-0.953	0.0328	-0.114	-0.436	0.517
LOC_Os01g48720.1	transcription initiation factor TFIID subunit 11, putative, expressed	0.95909	0.243298	0.522028	0.861	0.776	0.86	-0.0704	-1.66	-0.889	-0.586	1.01	-0.656	0.233
LOC_Os01g48760.2	auxin-responsive protein, putative, expressed	0.35558	0.613724	0.191023	0.812	0.825	0.8	-0.467	-0.251	-0.677	0.118	-0.098	-0.349	0.329
LOC_Os01g48810.1	wax synthase, putative, expressed	0.495927	0.916364	0.428345	0.829	0.846	0.85	-0.504	-0.0767	0.589	0.506	0.0788	0.00207	-0.587
LOC_Os01g48850.1	AMP-binding enzyme, putative, expressed	0.44779	0.0525838	0.863783	0.824	0.673	0.886	1.2	-3.36	-0.266	-1.8	2.75	-0.606	-0.34
LOC_Os01g48874.1	splicing factor-related, putative, expressed	0.0713076	0.0159742	0.757021	0.716	0.563	0.879	-2.72	-3.94	0.426	1.17	2.38	-1.56	-1.99
LOC_Os01g48910.3	glutamate synthase, chloroplast precursor, putative, expressed	0.776542	0.101236	0.274362	0.85	0.721	0.824	-0.133	-0.827	-0.528	-0.239	0.455	-0.372	0.156
LOC_Os01g48930.1	uncharacterized kinase mug58, putative, expressed	0.0429078	0.0707183	0.048898	0.676	0.696	0.682	1.41	1.23	1.36	-0.41	-0.227	0.999	-0.362
LOC_Os01g48960.1	katanin p60 ATPase-containing subunit, putative, expressed	0.278705	0.0406678	0.0718364	0.8	0.652	0.721	-0.212	-0.438	-0.374	-0.0442	0.182	-0.256	0.118
LOC_Os01g48990.2	ATP synthase, putative, expressed	0.0980591	0.822815	0.498636	0.738	0.84	0.858	-2.58	-0.323	-0.989	1.61	-0.651	-0.974	0.0146
LOC_Os01g49000.1	WD repeat-containing protein, putative, expressed	0.747496	0.124473	0.610583	0.849	0.735	0.869	-0.316	1.61	0.502	0.765	-1.16	0.449	-0.053
LOC_Os01g49190.1	formyl transferase, putative, expressed	0.100535	0.836564	0.159436	0.739	0.841	0.787	0.193	-0.0225	-0.162	-0.191	0.0247	0.00218	0.164
LOC_Os01g49290.1	DUF292 domain containing protein, expressed	0.349729	0.00891879	0.067895	0.811	0.499	0.715	0.112	-0.376	0.236	-0.119	0.369	-0.00712	-0.243
LOC_Os01g49330.1	OsPOP3 - Putative Prolyl Oligopeptidase homologue, expressed	0.106716	0.148655	0.033499	0.743	0.746	0.639	-0.596	-0.526	-0.833	0.108	0.037	-0.489	0.344
LOC_Os01g49350.1	Ser/Thr protein phosphatase family protein, putative, expressed	0.49799	0.0218931	0.541425	0.829	0.595	0.862	-0.108	0.423	0.0973	0.211	-0.32	0.103	0.00563
LOC_Os01g49510.1	expressed protein	0.225518	0.438563	0.176228	0.788	0.808	0.795	1.18	0.738	1.34	-0.37	0.0764	0.815	-0.521
LOC_Os01g49690.1	peptidyl-tRNA hydrolase, mitochondrial precursor protein, putative, expressed	0.0238551	0.00147855	0.0992549	0.624	0.276	0.75	-0.398	-0.658	-0.27	0.0665	0.327	-0.331	-0.0615
LOC_Os01g49740.1	transposon protein, putative, unclassi	0.0873969	0.0517897	0.840508	0.73	0.672	0.884	2.61	3.05	0.283	-1.13	-1.56	1.49	1.2
LOC_Os01g49900.1	peptidyl-tRNA hydrolase, mitochondrial precursor protein, putative, expressed	0.246706	0.486633	0.336198	0.793	0.813	0.836	1.97	1.16	1.62	-0.787	0.031	1.19	-0.432
LOC_Os01g50340.1	transposon protein, putative, unclassified, expressed	0.685483	0.393097	0.715005	0.844	0.802	0.876	-0.896	-1.92	0.808	0.394	1.42	-0.503	-1.31
LOC_Os01g50450.1	expressed protein	0.000786747	0.00661322	0.459372	0.211	0.464	0.854	-1.35	0.957	0.212	1.3	-1	-0.0444	-0.256
LOC_Os01g50770.1	adaptor complexes medium subunit family domain containing protein, expressed	0.00562717	0.00168827	0.000986578	0.465	0.292	0.147	-1.19	-1.45	-1.57	0.136	0.396	-1.05	0.518
LOC_Os01g51010.1	DUF292 domain containing protein, expressed	0.0638793	0.533406	0.296429	0.708	0.818	0.829	2.27	0.697	1.19	-1.23	0.342	1.04	-0.153
LOC_Os01g51120.1	vesicle transport v-SNARE protein, putative, expressed	0.00322214	0.00530687	0.0442993	0.393	0.437	0.671	3.86	3.55	2.28	-1.44	-1.13	2.42	0.145
LOC_Os01g51154.3	single myb histone, putative, expressed	0.20573	0.808443	0.747483	0.783	0.839	0.879	1.08	0.198	-0.264	-0.828	0.0559	0.254	0.518
LOC_Os01g51200.1	CK1_CaseinKinase_1.3 - CK1 includes the casein kinase 1 kinases, expressed	0.00964522	0.00110428	0.0561487	0.529	0.24	0.696	0.33	0.473	0.221	-0.0737	-0.217	0.256	0.0348
LOC_Os01g51280.1	5-nucleotidase surE, putative, expressed	0.00232345	0.0960186	0.304668	0.35	0.718	0.83	-2.73	-1.21	0.712	1.92	0.407	-0.807	-1.52
LOC_Os01g51300.1	WD domain, G-beta repeat domain containing protein, expressed	0.000102228	0.000536012	0.0212312	0.0539	0.162	0.58	0.73	0.584	0.312	-0.324	-0.177	0.406	0.0946
LOC_Os01g51300.2	WD domain, G-beta repeat domain containing protein, expressed	0.069982	0.0773785	0.126842	0.714	0.702	0.77	0.715	0.694	0.586	-0.217	-0.195	0.499	-0.087
LOC_Os01g51410.2	glycine dehydrogenase, putative, expressed	0.316228	0.0486315	0.801013	0.806	0.666	0.882	0.116	-0.249	-0.0284	-0.157	0.209	-0.0403	-0.0119
LOC_Os01g51570.1	glycosyl hydrolases family 17, putative, expressed	0.434192	0.0257424	0.967084	0.822	0.611	0.891	-0.622	-2.02	-0.0322	-0.0467	1.35	-0.668	-0.636
LOC_Os01g51700.3	ras-related protein, putative, expressed	0.0149295	0.078631	0.940356	0.578	0.703	0.89	1.07	-0.709	0.0276	-0.973	0.806	0.0973	0.0697
LOC_Os01g51800.1	expressed protein	0.800476	0.704199	0.201024	0.852	0.832	0.804	0.311	0.468	1.64	0.295	0.138	0.606	-1.04
LOC_Os01g51840.3	IQ calmodulin-binding motif family protein, putative, expressed	0.809759	0.756053	0.587072	0.852	0.836	0.867	0.266	-0.344	0.605	-0.135	0.476	0.132	-0.473
LOC_Os01g51890.1	endonuclease/exonuclease/phosphatase family domain containing protein, expressed	0.484266	0.100865	0.28972	0.828	0.721	0.827	0.667	1.67	-1.03	-0.34	-1.34	0.327	1.36
LOC_Os01g52090.2	transcription factor like protein, putative, expressed	0.0988182	0.0581999	0.0443657	0.738	0.681	0.671	-1.31	-1.54	-1.66	0.182	0.414	-1.13	0.532
LOC_Os01g52214.1	ubiquinone oxidoreductase, putative, expressed	0.697906	0.650672	0.493288	0.845	0.828	0.857	-0.611	-0.714	1.09	0.552	0.655	-0.0592	-1.15
LOC_Os01g52240.1	chlorophyll A-B binding protein, putative, expressed	0.0402191	0.176396	0.586386	0.671	0.757	0.866	0.467	0.287	0.11	-0.251	-0.0706	0.216	0.106
LOC_Os01g52390.1	plasminogen activator inhibitor 1 RNA-binding protein, putative, expressed	0.087217	0.507597	0.0465845	0.73	0.815	0.677	-0.242	-0.0873	-0.291	0.0873	-0.0679	-0.155	0.136
LOC_Os01g52490.1	40S ribosomal protein S24, putative, expressed	0.00934088	0.00377761	0.931901	0.526	0.395	0.889	0.709	0.833	0.019	-0.319	-0.443	0.39	0.371
LOC_Os01g52500.3	NADP-dependent malic enzyme, putative, expressed	0.00102445	0.000315833	0.0231801	0.243	0.12	0.592	-0.896	-1.06	-0.516	0.278	0.442	-0.618	-0.102
LOC_Os01g52750.1	OsSub3 - Putative Subtilisin homologue, expressed	0.206765	0.13378	0.114777	0.783	0.74	0.762	-0.353	-0.428	-0.453	0.0448	0.119	-0.309	0.145
LOC_Os01g53150.2	GTPase of unknown function domain containing protein, putative, expressed	0.217316	0.469717	0.067989	0.786	0.811	0.715	-0.533	-0.303	-0.831	0.116	-0.114	-0.417	0.415
LOC_Os01g53250.1	NADPH reductase, putative, expressed	0.454473	0.898583	0.903426	0.825	0.845	0.888	0.613	0.103	-0.0979	-0.458	0.0516	0.154	0.252
LOC_Os01g53520.1	reticulon domain containing protein, putative, expressed	0.0521175	0.00874013	0.223131	0.692	0.497	0.811	0.489	0.728	0.287	-0.113	-0.352	0.376	0.0893
LOC_Os01g53560.1	phosphoesterase, putative, expressed	0.78709	0.783415	0.0586214	0.851	0.838	0.701	-0.0609	-0.062	-0.472	-0.088	-0.0869	-0.149	0.324
LOC_Os01g53680.1	6-phosphofructokinase, putative, expressed	0.0265367	0.0278771	0.0023653	0.634	0.618	0.243	-0.948	-0.937	-1.49	0.104	0.0929	-0.844	0.648
LOC_Os01g53700.1	mitochondrial-processing peptidase subunit, mitochondrial precursor, putative, expressed	0.117291	0.016907	0.176653	0.749	0.569	0.795	-2.21	-3.73	-1.87	0.259	1.77	-1.95	-0.0797
LOC_Os01g53890.1	RNA methyltransferase, TrmH family protein, putative, expressed	0.143686	0.257495	0.00177339	0.762	0.779	0.208	-0.242	0.183	-0.658	0.0627	-0.362	-0.179	0.478
LOC_Os01g53910.1	dehydrogenase, putative, expressed	0.473746	0.164273	0.679892	0.827	0.753	0.874	-0.465	-0.94	-0.265	0.0472	0.523	-0.417	-0.152
LOC_Os01g53930.1	hexokinase, putative, expressed	0.0480688	0.131739	0.462147	0.686	0.739	0.854	0.195	-0.141	-0.0656	-0.198	0.138	-0.00305	0.0625
LOC_Os01g54020.1	tRNA synthetase, putative, expressed	0.0313956	0.0134869	0.251432	0.65	0.546	0.818	1.08	1.3	0.521	-0.355	-0.574	0.725	0.204
LOC_Os01g54080.1	kinesin motor protein-related, putative, expressed	0.0127909	0.000397879	0.0375641	0.561	0.137	0.652	0.607	1.07	0.478	-0.0693	-0.528	0.538	0.0595
LOC_Os01g54119.1	retrotransposon protein, putative, unclassified, expressed	0.0436366	0.000266163	0.670181	0.678	0.107	0.873	0.608	1.49	0.114	-0.0555	-0.934	0.552	0.438
LOC_Os01g54390.2	S4 domain containing protein, putative, expressed	0.0703128	0.151173	0.0773959	0.715	0.748	0.728	-2.24	-1.71	-2.17	0.706	0.181	-1.53	0.642
LOC_Os01g54480.1	serine/threonine protein kinase, putative, expressed	0.0354685	0.0711964	0.0337088	0.66	0.696	0.64	0.765	0.633	0.775	-0.222	-0.0902	0.543	-0.231
LOC_Os01g54510.1	MAC/Perforin domain containing protein, putative, expressed	0.0441419	0.838337	0.51792	0.679	0.841	0.86	-0.606	0.0546	-0.175	0.425	-0.236	-0.182	-0.00675
LOC_Os01g54530.1	hydrolase, acting on carbon-nitrogen, putative, expressed	0.0843155	0.0284954	0.542799	0.727	0.62	0.862	-1.99	-2.66	0.649	0.986	1.66	-1	-1.65
LOC_Os01g54560.3	trehalose synthase, putative, expressed	0.391612	0.0551981	0.679877	0.817	0.677	0.874	-1.04	-2.54	0.494	0.269	1.77	-0.773	-1.27
LOC_Os01g54670.1	coiled-coil domain-containing protein 25, putative, expressed	0.0100223	0.0166011	0.0891542	0.534	0.567	0.741	2.76	2.5	1.62	-1.04	-0.776	1.72	0.0967
LOC_Os01g54920.2	heat- and acid-stable phosphoprotein, putative, expressed	0.0106055	0.00072481	0.666979	0.54	0.191	0.873	2.07	3.22	0.288	-0.677	-1.83	1.4	1.11
LOC_Os01g54940.1	dehydrogenase, putative, expressed	0.951021	0.552304	0.179612	0.86	0.82	0.796	-0.0156	-0.153	0.36	0.0635	0.201	0.0479	-0.312
LOC_Os01g55170.1	la domain containing protein, expressed	0.0894329	0.274979	0.765634	0.731	0.783	0.88	-1.5	0.914	0.242	1.41	-0.999	-0.0848	-0.327
LOC_Os01g55360.3	phosphatidate cytidylyltransferase, putative, expressed	0.269336	0.306094	0.0508326	0.798	0.789	0.686	0.832	0.767	1.59	-0.035	0.03	0.797	-0.792
LOC_Os01g55540.1	aminotransferase, classes I and II, domain containing protein, expressed	0.00243517	0.0164239	0.000444252	0.356	0.566	0.0809	-0.611	-0.433	-0.787	0.153	-0.0249	-0.458	0.329
LOC_Os01g55570.4	expressed protein	0.295499	0.00532512	0.0136181	0.803	0.438	0.517	-0.992	-3.24	-2.72	-0.747	1.5	-1.74	0.982
LOC_Os01g55590.1	AMP-binding enzyme, putative, expressed	0.00318697	0.0405108	0.00550333	0.391	0.651	0.374	-0.513	-0.309	-0.468	0.191	-0.0135	-0.323	0.145
LOC_Os01g55690.1	glutelin, putative, expressed	0.000605379	0.00287214	0.00530047	0.181	0.36	0.368	5.97	4.71	4.25	-2.24	-0.978	3.73	-0.516
LOC_Os01g55770.1	expressed protein	0.000171022	0.0108772	0.156535	0.0794	0.522	0.786	0.941	0.493	-0.239	-0.642	-0.194	0.299	0.538
LOC_Os01g55830.1	glutathione S-transferase, putative, expressed	0.236748	0.268887	0.107883	0.791	0.782	0.757	0.424	0.394	0.597	-0.0703	-0.0405	0.354	-0.243
LOC_Os01g56300.1	expressed protein	0.24113	0.382098	0.934111	0.792	0.801	0.89	-1.95	-1.43	0.132	1.14	0.617	-0.812	-0.944
LOC_Os01g56350.3	PTAC12, putative, expressed	0.473937	0.175178	0.226554	0.827	0.757	0.812	0.619	1.22	1.07	0.109	-0.49	0.727	-0.346
LOC_Os01g56360.1	wax synthase, putative, expressed	0.253323	0.545513	0.0803657	0.795	0.819	0.731	1.1	0.565	1.77	-0.239	0.292	0.857	-0.91
LOC_Os01g56420.1	ctr copper transporter family protein, putative, expressed	0.499244	0.892522	0.762117	0.829	0.844	0.88	0.922	-0.182	-0.409	-0.839	0.265	0.0828	0.492
LOC_Os01g56550.1	transcription initiation factor IIF beta subunit, putative, expressed	0.000367775	0.000149744	0.0110387	0.132	0.0712	0.485	1.56	1.76	0.903	-0.503	-0.704	1.06	0.152
LOC_Os01g56600.1	signal recognition particle 54 kDa protein, putative, expressed	0.236228	0.318068	0.272977	0.791	0.791	0.824	0.121	0.1	-0.111	-0.093	-0.0729	0.0275	0.138
LOC_Os01g56800.3	MATH domain containing protein, expressed	0.00493481	0.985361	0.651454	0.448	0.85	0.872	-3.06	0.0157	-0.389	2.2	-0.874	-0.858	-0.469
LOC_Os01g56910.1	expressed protein	0.00107028	0.00457844	0.00652206	0.249	0.419	0.401	-1.2	-0.95	-0.893	0.437	0.19	-0.76	0.133
LOC_Os01g56969.1	homeobox-leucine zipper protein ATHB-54, putative, expressed	0.301071	0.543515	0.152	0.804	0.819	0.784	-1.15	-0.661	-1.64	0.287	-0.2	-0.861	0.775
LOC_Os01g57066.1	transmembrane protein 49, putative, expressed	0.235082	0.843091	0.294058	0.791	0.841	0.828	1.57	-0.252	1.38	-0.897	0.925	0.673	-0.702
LOC_Os01g57210.2	katanin p80 WD40 repeat-containing subunit B1 homolog 1, putative, expressed	0.423274	0.00859472	0.00110417	0.821	0.495	0.159	0.588	2.33	3.27	0.961	-0.784	1.55	-1.73
LOC_Os01g57570.1	NADPH-dependent FMN reductase domain containing protein, expressed	0.181763	0.107058	0.180855	0.776	0.725	0.796	-0.401	-0.496	-0.402	0.0764	0.171	-0.325	0.0773
LOC_Os01g58022.1	NADPH-dependent oxidoreductase, putative, expressed	0.921341	0.309073	0.0516655	0.859	0.789	0.688	0.0239	-0.254	-0.527	-0.213	0.0647	-0.189	0.338
LOC_Os01g58049.1	photosystem I assembly protein ycf4, putative, expressed	0.076542	0.0559981	0.00799782	0.721	0.678	0.434	0.298	0.326	-0.503	-0.268	-0.296	0.0302	0.534
LOC_Os01g58080.3	membrane-associated salt-inducible protein, putative, expressed	0.00389921	0.00155079	0.0578426	0.418	0.281	0.699	-2.34	-2.72	-1.33	0.747	1.12	-1.6	-0.27
LOC_Os01g58290.1	OsSub9 - Putative Subtilisin homologue, expressed	0.263973	0.294604	0.76385	0.797	0.787	0.88	0.156	-0.146	0.0406	-0.144	0.159	0.0127	-0.0279
LOC_Os01g58380.1	3-hydroxybutyryl-CoA dehydrogenase, putative, expressed	0.0523455	0.0504399	0.0248566	0.692	0.669	0.601	0.274	0.277	0.329	-0.0539	-0.0567	0.22	-0.109
LOC_Os01g58550.2	methyladenine glycosylase, putative, expressed	0.814333	0.0339062	0.906868	0.853	0.636	0.888	0.343	3.54	0.171	0.669	-2.52	1.01	0.842
LOC_Os01g58580.1	ICE-like protease p20 domain containing protein, putative, expressed	0.000185789	0.76747	0.849507	0.0843	0.837	0.885	-0.972	-0.0493	-0.0316	0.709	-0.214	-0.263	-0.232
LOC_Os01g58680.1	apurinic endonuclease-redox protein, putative, expressed	0.118253	0.901263	0.067614	0.75	0.845	0.715	0.307	0.0228	0.369	-0.133	0.152	0.175	-0.195
LOC_Os01g58740.2	glycerol-3-phosphate dehydrogenase, putative, expressed	0.573577	0.728501	0.67726	0.836	0.834	0.874	-0.627	-0.384	0.462	0.489	0.247	-0.137	-0.599
LOC_Os01g58750.1	expressed protein	0.251774	0.00185947	0.595412	0.794	0.304	0.867	-0.968	-3.41	0.435	-0.0188	2.43	-0.987	-1.42
LOC_Os01g58790.2	GHMP kinases ATP-binding protein, putative, expressed	0.72475	0.736577	0.814184	0.847	0.834	0.883	-0.0722	-0.0689	-0.0481	0.0249	0.0216	-0.0473	0.000784
LOC_Os01g58870.1	domain of unknown function, DUF250 domain containing protein, expressed	0.63721	0.0397189	0.0281709	0.841	0.65	0.617	0.104	-0.513	-0.557	-0.346	0.271	-0.241	0.316
LOC_Os01g58890.2	cysteine proteinase inhibitor precursor protein, putative, expressed	0.41448	0.150464	0.726309	0.82	0.747	0.877	-1.18	-2.17	0.5	0.469	1.46	-0.714	-1.21
LOC_Os01g59090.1	thylakoid lumenal 20 kDa protein, putative, expressed	0.243512	0.524911	0.988464	0.792	0.817	0.892	0.256	0.136	0.00306	-0.157	-0.0371	0.0988	0.0958
LOC_Os01g59140.1	DNA-directed RNA polymerases I, II, and III subunit RPABC1, putative, expressed	0.00024159	0.00363936	0.0118329	0.101	0.39	0.496	0.862	0.576	0.466	-0.386	-0.1	0.476	0.0103
LOC_Os01g59150.2	tubulin/FtsZ domain containing protein, putative, expressed	0.0117872	0.698743	0.000793348	0.552	0.832	0.127	0.762	0.0972	1.19	-0.249	0.416	0.513	-0.68
LOC_Os01g59510.1	chloroplast ribonuclease III domain protein, putative, expressed	0.755322	0.536289	0.963579	0.849	0.818	0.891	0.0442	-0.0885	0.00646	-0.0537	0.079	-0.00945	-0.0159
LOC_Os01g59530.2	OsCML1 - Calmodulin-related calcium sensor protein, expressed	0.29262	0.514857	0.147529	0.802	0.816	0.782	-0.443	0.269	-0.628	0.243	-0.469	-0.2	0.427
LOC_Os01g59600.2	peptidase, T1 family, putative, expressed	0.397611	0.0823613	0.0310159	0.818	0.707	0.629	-0.219	-0.481	-0.628	-0.113	0.149	-0.332	0.296
LOC_Os01g59630.1	exostosin family domain containing protein, expressed	0.664163	0.796628	0.122868	0.843	0.838	0.768	0.138	-0.0814	-0.521	-0.254	-0.0349	-0.116	0.405
LOC_Os01g59730.1	ribosomal protein L7Ae, putative, expressed	0.110264	0.0855944	0.0403284	0.745	0.71	0.661	2.71	2.95	3.66	-0.38	-0.623	2.33	-1.33
LOC_Os01g59740.1	expressed protein	0.329031	0.0598241	0.0457315	0.808	0.683	0.675	-0.156	-0.324	-0.349	-0.0515	0.117	-0.207	0.142
LOC_Os01g59800.3	EAP30/Vps36 family domain containing protein, expressed	0.742466	0.228937	0.893936	0.848	0.772	0.887	0.156	-0.594	-0.0631	-0.281	0.468	-0.125	-0.0621
LOC_Os01g59920.1	cysteine synthase, chloroplast precursor, putative, expressed	0.295018	0.00711272	0.0541347	0.803	0.473	0.693	-0.481	-1.49	-0.955	-0.251	0.759	-0.732	0.223
LOC_Os01g59930.1	NADH-cytochrome b5 reductase, putative, expressed	0.0788812	0.688458	0.0592095	0.723	0.831	0.702	0.611	0.128	0.666	-0.26	0.223	0.351	-0.315
LOC_Os01g59980.1	zinc finger family protein, putative, expressed	0.109733	0.134305	0.540816	0.745	0.74	0.862	-1.81	-1.68	-0.649	0.775	0.644	-1.03	-0.385
LOC_Os01g59990.2	ribosomal protein L24, putative, expressed	0.0781472	0.00428079	0.717336	0.722	0.411	0.877	0.54	1.03	-0.102	-0.174	-0.66	0.366	0.468
LOC_Os01g60440.1	HEAT repeat family protein, putative, expressed	0.0837312	0.00496508	0.121305	0.727	0.429	0.767	0.209	0.396	0.184	-0.0118	-0.199	0.197	0.0132
LOC_Os01g60660.1	methionyl-tRNA synthetase, putative, expressed	0.057808	0.0830986	0.00937609	0.7	0.707	0.46	0.224	-0.201	0.338	-0.134	0.291	0.0904	-0.248
LOC_Os01g60740.1	LTPL16 - Protease inhibitor/seed storage/LTP family protein precursor, expressed	0.500896	0.794006	0.174801	0.829	0.838	0.794	-0.468	-0.18	-0.982	0.0605	-0.228	-0.407	0.575
LOC_Os01g60790.1	40S ribosomal protein S26, putative, expressed	0.000900367	0.00141594	0.796111	0.227	0.27	0.882	0.663	0.62	0.0366	-0.333	-0.29	0.33	0.293
LOC_Os01g61310.1	DUF640 domain containing protein, putative, expressed	0.89186	0.867124	0.77472	0.857	0.843	0.88	-0.0506	-0.0622	0.107	0.049	0.0607	-0.00154	-0.108
LOC_Os01g61380.1	lactate/malate dehydrogenase, putative, expressed	0.219404	0.841462	0.466909	0.787	0.841	0.855	0.167	0.0261	-0.0961	-0.143	-0.00184	0.0242	0.12
LOC_Os01g61400.1	sufB/sufD domain containing protein, putative, expressed	0.0843834	0.0374307	0.0477693	0.727	0.645	0.679	-1.69	-2.12	-1.99	0.238	0.671	-1.45	0.542
LOC_Os01g61410.4	NADH-ubiquinone oxidoreductase, mitochondrial precursor, putative, expressed	0.144242	0.379241	0.569969	0.762	0.8	0.865	2.82	1.63	1.04	-1.45	-0.259	1.37	0.333
LOC_Os01g61460.1	leaf senescence related protein, putative, expressed	0.394076	0.30359	0.255645	0.817	0.788	0.82	0.432	-0.527	-0.586	-0.603	0.357	-0.17	0.416
LOC_Os01g61500.2	BAG domain containing protein, expressed	0.00850478	0.635782	0.095043	0.515	0.827	0.746	-2.6	0.381	1.45	2.41	-0.573	-0.191	-1.64
LOC_Os01g61580.3	selT-like protein precursor, putative, expressed	0.597841	0.00214981	0.0302497	0.838	0.323	0.626	-0.0734	-0.566	-0.344	-0.172	0.32	-0.246	0.0978
LOC_Os01g61590.1	CAMK_CAMK_like.1 - CAMK includes calcium/calmodulin depedent protein kinases, expressed	0.263958	0.672504	0.340572	0.797	0.83	0.837	-1.36	-0.499	1.15	1.18	0.322	-0.178	-1.33
LOC_Os01g61710.6	coatomer subunit delta, putative, expressed	0.806799	0.459103	0.0041147	0.852	0.81	0.327	-0.25	0.768	3.77	1.32	0.304	1.07	-2.7
LOC_Os01g61890.4	AT hook motif family protein, expressed	0.000840961	0.00076427	0.0407092	0.219	0.197	0.662	1.07	1.09	0.526	-0.402	-0.417	0.673	0.147
LOC_Os01g61930.1	SAC3/GANP family protein, putative, expressed	0.0406076	0.0847413	0.263078	0.672	0.709	0.821	2.92	2.37	1.46	-1.23	-0.681	1.69	0.226
LOC_Os01g62020.1	NAD dependent epimerase/dehydratase family domain containing protein, expressed	0.396121	0.147886	0.466072	0.818	0.746	0.854	1.04	-1.84	0.885	-1.02	1.86	0.0205	-0.865
LOC_Os01g62040.1	ruvB-like, putative, expressed	0.239338	0.343806	0.0105632	0.791	0.795	0.478	0.643	-0.51	1.64	-0.201	0.953	0.442	-1.19
LOC_Os01g62210.1	50S ribosomal protein L17, putative, expressed	0.1374	0.0659096	0.926916	0.759	0.69	0.889	0.347	0.446	-0.0201	-0.154	-0.252	0.193	0.213
LOC_Os01g62244.2	ubiquitin-conjugating enzyme, putative, expressed	0.991926	0.446817	0.260067	0.862	0.809	0.821	-0.0133	1.02	-1.54	-0.12	-1.15	-0.133	1.41
LOC_Os01g62260.1	thaumatin, putative, expressed	0.00799616	0.788309	0.554414	0.507	0.838	0.864	5.18	0.425	0.942	-3.54	1.21	1.64	0.694
LOC_Os01g62350.1	60S ribosomal protein L36-2, putative, expressed	0.405273	0.541806	0.0410847	0.819	0.819	0.663	0.482	0.35	-1.31	-0.602	-0.47	-0.12	1.19
LOC_Os01g62420.1	triosephosphate isomerase, cytosolic, putative, expressed	0.647987	0.56855	0.5243	0.842	0.821	0.861	-0.722	-0.905	1.01	0.569	0.751	-0.154	-1.17
LOC_Os01g62440.1	ribonuclease protein, putative, expressed	0.29695	0.977857	0.382399	0.803	0.849	0.844	0.222	-0.00574	-0.184	-0.214	0.0138	0.00804	0.193
LOC_Os01g62780.1	expressed protein	0.0060105	0.0351686	0.0486715	0.473	0.639	0.681	-4.23	-2.94	2.71	3.12	1.83	-1.12	-3.83
LOC_Os01g62820.3	Transcription initiation factor TFIID subunit A containing protein, expressed	0.00830724	0.527156	0.176924	0.512	0.817	0.795	-2.63	0.516	1.15	2.39	-0.757	-0.241	-1.39
LOC_Os01g62950.1	ras-related protein, putative, expressed	0.0021059	0.0206966	0.765165	0.337	0.59	0.88	-4.09	-2.7	-0.298	2.32	0.926	-1.77	-1.48
LOC_Os01g63220.3	kinase, pfkB family, putative, expressed	0.0687482	0.000569614	0.00186477	0.713	0.167	0.213	-0.24	-0.599	-0.502	-0.0952	0.264	-0.335	0.167
LOC_Os01g63270.2	alpha-glucan phosphorylast isozym	0.00137923	0.000608261	0.177746	0.281	0.173	0.795	0.435	0.491	-0.141	-0.239	-0.295	0.196	0.337
LOC_Os01g63410.1	expressed protein	0.256084	0.0621014	0.666209	0.795	0.686	0.873	1.16	2.03	0.426	-0.255	-1.13	0.904	0.478
LOC_Os01g63470.1	C2 domain containing protein, expressed	0.174965	0.15514	0.609349	0.774	0.749	0.868	1.13	1.19	-0.406	-0.651	-0.711	0.478	0.884
LOC_Os01g63580.1	glycerol-3-phosphate acyltransferase, putative, expressed	0.33859	0.908202	0.419217	0.81	0.845	0.849	0.959	-0.113	-0.804	-0.949	0.123	0.0108	0.815
LOC_Os01g63690.1	hs1, putative, expressed	0.792782	0.359853	0.640517	0.851	0.797	0.871	0.244	0.87	-0.436	-0.0746	-0.701	0.17	0.606
LOC_Os01g64010.2	dual specificity protein phosphatase, putative, expressed	0.00375625	0.121876	0.951475	0.413	0.734	0.89	2.2	0.972	-0.0357	-1.41	-0.189	0.783	0.819
LOC_Os01g64090.1	L1P family of ribosomal proteins domain containing protein, expressed	0.0998154	0.341281	0.160855	0.739	0.795	0.788	-0.655	-0.359	-0.546	0.265	-0.0308	-0.39	0.156
LOC_Os01g64110.1	glycosyl hydrolase, putative, expressed	0.017147	0.000275676	0.0802362	0.592	0.11	0.731	-0.545	-1.07	-0.369	0.0493	0.572	-0.495	-0.126
LOC_Os01g64250.1	hemerythrin family protein, expressed	0.0817178	0.138813	0.0104345	0.725	0.742	0.476	0.215	0.178	0.352	-0.0284	0.00821	0.186	-0.166
LOC_Os01g64270.1	expressed protein	0.0233993	0.844732	0.998395	0.623	0.842	0.893	2.93	-0.217	0.00223	-2.25	0.895	0.678	0.676
LOC_Os01g64360.1	MYB family transcription factor, putative, expressed	0.0962243	0.136208	0.00806136	0.736	0.741	0.436	-0.234	-0.206	-0.425	0.0176	-0.0101	-0.216	0.209
LOC_Os01g64520.2	uricase, putative, expressed	0.0117216	0.249088	0.0496592	0.551	0.777	0.683	0.432	-0.169	0.311	-0.288	0.313	0.143	-0.168
LOC_Os01g64630.4	actin, putative, expressed	0.403751	0.613977	0.0550414	0.819	0.825	0.694	0.858	0.512	2.15	0.0228	0.369	0.881	-1.27
LOC_Os01g64650.1	VAMP-like protein YKT62, putative, expressed	0.000872259	0.0766611	0.910658	0.224	0.702	0.888	-4.51	-1.86	0.108	2.95	0.294	-1.57	-1.67
LOC_Os01g64660.2	fructose-1,6-bisphosphatase, putative, expressed	0.00111659	0.0485793	0.069048	0.254	0.666	0.717	0.505	0.246	0.223	-0.262	-0.00261	0.244	0.0206
LOC_Os01g64670.3	soluble inorganic pyrophosphatase, putative, expressed	0.506695	0.800136	0.0739119	0.83	0.839	0.723	0.502	-0.189	1.46	-0.0576	0.634	0.444	-1.02
LOC_Os01g64690.1	LSM domain containing protein, expressed	0.429121	0.434496	0.244243	0.822	0.807	0.817	-0.852	-0.842	-1.28	0.108	0.098	-0.744	0.538
LOC_Os01g64870.1	expressed protein	0.849804	0.00970074	0.522988	0.855	0.509	0.861	-0.0774	-1.29	0.264	-0.199	1.02	-0.276	-0.54
LOC_Os01g64960.1	chlorophyll A-B binding protein, putative, expressed	0.0156642	0.0566569	0.312343	0.583	0.679	0.832	0.312	-0.23	-0.113	-0.32	0.222	-0.00766	0.105
LOC_Os01g64970.1	CAMK_CAMK_like.11 - CAMK includes calcium/calmodulin depedent protein kinases, expressed	0.71749	0.293469	0.847944	0.847	0.786	0.885	-0.502	-1.5	-0.265	-0.0646	0.933	-0.567	-0.301
LOC_Os01g65090.2	aminotransferase, classes I and II, domain containing protein, expressed	0.121453	0.0156771	0.334725	0.752	0.562	0.836	-0.734	-1.27	-0.438	0.123	0.661	-0.611	-0.173
LOC_Os01g65220.1	XRN 5'-3' exonuclease N-terminus domain containing protein, expressed	0.150641	0.936411	0.0318827	0.765	0.847	0.633	-0.764	-0.0399	-1.23	0.255	-0.469	-0.509	0.722
LOC_Os01g65260.1	amidophosphoribosyltransferase, chloroplast precursor, putative, expressed	0.472126	0.910584	0.730802	0.826	0.845	0.878	0.991	0.153	0.469	-0.588	0.251	0.403	-0.0658
LOC_Os01g65330.1	expressed protein	0.00158346	0.0556964	0.00118699	0.299	0.677	0.166	2.96	1.46	3.09	-1.08	0.414	1.88	-1.21
LOC_Os01g65380.1	patellin protein, putative, expressed	0.0947355	0.0942219	0.00814085	0.735	0.716	0.437	-0.306	-0.306	-0.552	0.0148	0.0154	-0.291	0.261
LOC_Os01g65450.2	ubiquitin-like domain-containing CTD phosphatase 1, putative, expressed	0.620342	0.0997016	0.129304	0.84	0.72	0.772	-0.301	-1.07	0.978	0.202	0.975	-0.0993	-1.08
LOC_Os01g65560.1	snRK1-interacting protein 1, putative, expressed	0.952318	0.251963	0.0243987	0.86	0.778	0.599	0.0308	0.612	1.35	0.467	-0.115	0.498	-0.849
LOC_Os01g65680.1	4,5-DOPA dioxygenase extradiol, putative, expressed	0.152184	0.0150496	0.00294951	0.766	0.557	0.274	-0.244	-0.465	-0.625	-0.0899	0.132	-0.334	0.292
LOC_Os01g65690.1	4,5-DOPA dioxygenase extradiol, putative, expressed	0.760821	0.575166	0.791446	0.849	0.822	0.881	-0.306	-0.567	-0.266	0.0214	0.282	-0.285	-0.019
LOC_Os01g65700.1	expressed protein	0.016301	0.0348457	0.991637	0.587	0.638	0.892	-3.63	-3.06	0.0133	1.96	1.39	-1.67	-1.68
LOC_Os01g65790.1	pectinesterase, putative, expressed	0.158978	0.0387278	0.939858	0.768	0.647	0.89	-1.35	-2.12	0.0683	0.499	1.27	-0.851	-0.919
LOC_Os01g65830.1	acyl-desaturase, chloroplast precursor, putative, expressed	0.722512	0.0847342	0.390743	0.847	0.709	0.845	-0.417	-2.2	-1.03	-0.494	1.29	-0.91	0.115
LOC_Os01g66000.1	NADH dehydrogenase I subunit N, putative, expressed	0.245642	0.550247	0.883801	0.793	0.82	0.887	0.727	0.363	0.088	-0.432	-0.0688	0.294	0.206
LOC_Os01g66110.2	methyltransferase, putative, expressed	0.000318997	0.0041205	0.187822	0.12	0.406	0.799	1.07	0.729	0.274	-0.554	-0.21	0.519	0.245
LOC_Os01g66200.1	expressed protein	0.686034	0.746133	0.669612	0.844	0.835	0.873	-0.803	0.642	0.848	0.975	-0.47	0.172	-0.676
LOC_Os01g66420.2	PHD finger protein, putative, expressed	0.00787902	0.155459	0.363834	0.506	0.749	0.841	1.35	0.617	0.381	-0.762	-0.0305	0.586	0.206
LOC_Os01g66720.1	NADP-dependent oxidoreductase, putative, expressed	0.28595	0.299743	0.212741	0.801	0.788	0.808	1.11	-1.08	-1.31	-1.43	0.758	-0.32	0.993
LOC_Os01g66940.1	kinase, pfkB family, putative, expressed	0.0128071	0.159547	0.0338188	0.561	0.751	0.64	-1.02	-0.505	-0.821	0.43	-0.0808	-0.585	0.236
LOC_Os01g66980.2	expressed protein	0.91875	0.926486	0.133696	0.859	0.846	0.774	-0.184	0.167	-2.89	-0.543	-0.894	-0.728	2.17
LOC_Os01g67000.1	membrane-associated 30 kDa protein, chloroplast precursor, putative, expressed	0.00441503	0.0101837	0.254348	0.434	0.515	0.819	0.881	0.758	-0.286	-0.543	-0.42	0.338	0.624
LOC_Os01g67054.1	calreticulin precursor protein, putative, expressed	0.133791	0.0157372	0.28644	0.758	0.562	0.827	-0.176	-0.316	-0.121	0.0226	0.163	-0.153	-0.0322
LOC_Os01g67120.1	rhodanese-like domain containing protein, putative, expressed	0.000792386	0.0206061	0.399222	0.212	0.589	0.846	0.473	0.269	0.0852	-0.266	-0.0623	0.207	0.122
LOC_Os01g67210.1	PPR repeat domain containing protein, putative, expressed	0.0318561	0.0177604	0.211551	0.651	0.574	0.807	-3.33	-3.79	-1.77	1.1	1.57	-2.22	-0.454
LOC_Os01g67250.2	Rad21 / Rec8 like protein, putative, expressed	0.60948	0.231451	0.471313	0.839	0.773	0.855	-0.365	-0.885	0.519	0.182	0.702	-0.183	-0.701
LOC_Os01g67570.1	PDE312/PTAC10, putative, expressed	0.995621	0.304019	0.133782	0.863	0.788	0.774	-0.00159	-0.308	-0.465	-0.192	0.114	-0.193	0.271
LOC_Os01g67590.1	oligopeptidase, putative, expressed	0.917189	0.372092	0.00768534	0.859	0.799	0.428	-0.0473	-0.415	1.5	0.308	0.676	0.26	-1.24
LOC_Os01g67720.1	ABC1 family domain containing protein, putative, expressed	0.569552	0.324482	0.706743	0.836	0.792	0.876	0.145	0.256	0.0956	-0.0209	-0.132	0.124	0.0287
LOC_Os01g67740.1	chromosome segregation protein, putative, expressed	0.344179	0.0817621	0.821247	0.811	0.706	0.883	-0.294	0.575	-0.0684	0.347	-0.522	0.0533	0.122
LOC_Os01g67860.1	fructose-bisphospate aldolase isozyme, putative, expressed	0.396018	0.00100669	0.0240723	0.818	0.229	0.597	0.111	0.588	0.335	0.148	-0.33	0.259	-0.0766
LOC_Os01g67880.1	vacuolar protein sorting-associated protein 53, putative, expressed	0.472014	0.0895417	0.396388	0.826	0.713	0.846	0.216	0.547	0.257	0.0387	-0.292	0.255	-0.00151
LOC_Os01g68060.1	copine, putative, expressed	0.000252054	0.0858006	0.0733641	0.104	0.71	0.723	-0.875	0.292	0.307	0.806	-0.361	-0.0689	-0.376
LOC_Os01g68320.2	DEAD-box ATP-dependent RNA helicase 30, putative, expressed	0.00603779	0.12813	0.485915	0.473	0.737	0.857	0.613	0.289	0.126	-0.356	-0.0321	0.257	0.131
LOC_Os01g68324.3	dolichyl-diphosphooligosaccharide--protein glycosyltransferase 63 kDasubunit precursor, putative, expressed	0.19766	0.831376	0.390303	0.781	0.841	0.845	0.139	-0.0219	0.0903	-0.0872	0.0738	0.0519	-0.0384
LOC_Os01g68380.2	expressed protein	0.0720331	0.513629	0.362499	0.716	0.816	0.841	-1.17	0.389	0.549	1.11	-0.446	-0.0566	-0.606
LOC_Os01g68450.1	expressed protein	0.0737607	0.0970529	0.540174	0.718	0.718	0.862	0.383	0.351	0.121	-0.17	-0.137	0.214	0.093
LOC_Os01g68480.1	thioredoxin, putative, expressed	0.125585	0.303453	0.021242	0.754	0.788	0.58	-1.8	-1.16	-2.96	0.318	-0.317	-1.48	1.48
LOC_Os01g68630.1	leaf senescence related protein, putative, expressed	0.820592	0.0196786	0.955645	0.853	0.585	0.891	0.0515	-0.622	-0.0126	-0.197	0.476	-0.146	-0.133
LOC_Os01g68710.1	peptidyl-prolyl cis-trans isomerase, FKBP-type, putative, expressed	0.235644	0.100044	0.930816	0.791	0.72	0.889	0.433	0.624	0.0304	-0.161	-0.352	0.272	0.241
LOC_Os01g68770.1	selenium-binding protein, putative, expressed	0.532769	0.266662	0.726095	0.832	0.781	0.877	-0.46	-0.84	0.257	0.199	0.579	-0.261	-0.518
LOC_Os01g68810.1	expressed protein	0.0177936	0.00436143	0.00635447	0.596	0.413	0.397	1.17	1.52	1.43	-0.139	-0.494	1.03	-0.397
LOC_Os01g69030.1	sucrose-phosphate synthase, putative, expressed	0.472736	0.301979	0.100231	0.826	0.788	0.751	0.38	0.555	0.927	0.0856	-0.0894	0.466	-0.462
LOC_Os01g69080.1	acyl-desaturase, chloroplast precursor, putative, expressed	0.191864	0.00527576	0.29569	0.779	0.437	0.829	0.602	1.55	0.474	0.0551	-0.896	0.657	0.183
LOC_Os01g69120.3	uncharacterized RNA methyltransferase pc1998, putative, expressed	0.00860834	0.0726304	0.134735	0.516	0.698	0.775	2.2	1.34	1.09	-1.04	-0.185	1.16	0.0717
LOC_Os01g69130.2	dynamin family protein, putative, expressed	0.0168687	0.500343	0.239402	0.59	0.815	0.815	0.364	0.0877	0.157	-0.212	0.0646	0.152	-0.00499
LOC_Os01g69250.1	mitochondrial import receptor subunit TOM20, putative, expressed	0.110784	0.290606	0.0763215	0.746	0.786	0.726	0.548	0.348	0.62	-0.169	0.0308	0.379	-0.241
LOC_Os01g69850.1	OsMADS65 - MADS-box family gene with MIKC* type-box, expressed	0.134179	0.82942	0.0634755	0.758	0.841	0.709	0.359	-0.0484	0.461	-0.166	0.241	0.193	-0.268
LOC_Os01g69900.1	CBS domain-containing protein, putative, expressed	0.208313	0.127966	0.731696	0.784	0.737	0.878	-0.15	-0.185	0.0392	0.0759	0.111	-0.0741	-0.113
LOC_Os01g69970.1	WD domain, G-beta repeat domain containing protein, expressed	0.46695	0.119069	0.422567	0.826	0.732	0.849	-0.61	-1.38	-0.675	-0.0566	0.715	-0.667	0.00811
LOC_Os01g69980.1	TCP family transcription factor, putative, expressed	0.0935076	0.0780151	0.402121	0.735	0.703	0.846	-1.41	-1.49	-0.661	0.517	0.602	-0.89	-0.229
LOC_Os01g69990.1	GYF domain containing protein, putative, expressed	0.0162381	0.055862	0.567615	0.586	0.678	0.865	-1.3	0.966	0.262	1.28	-0.984	-0.0172	-0.279
LOC_Os01g70010.1	ribosomal protein L7Ae, putative, expressed	0.0106541	0.00291397	0.0386081	0.541	0.362	0.656	-0.922	-1.16	-0.696	0.228	0.465	-0.694	0.00186
LOC_Os01g70020.1	DEK C terminal domain containing protein, expressed	0.314128	0.540883	0.225117	0.806	0.819	0.811	0.145	-0.0864	-0.177	-0.175	0.0568	-0.0296	0.147
LOC_Os01g70090.1	enoyl-CoA hydratase/isomerase family protein, putative, expressed	0.000360141	0.000349939	0.000532486	0.13	0.127	0.0935	-1.44	-1.45	-1.36	0.378	0.384	-1.06	0.301
LOC_Os01g70170.1	transaldolase, putative, expressed	0.00260313	0.00212602	0.00162702	0.365	0.321	0.199	-0.441	-0.455	-0.475	0.0981	0.113	-0.343	0.132
LOC_Os01g70300.2	aspartokinase 3, chloroplast precursor, putative, expressed	0.995394	0.938415	0.334106	0.863	0.847	0.836	-0.00724	-0.0969	1.24	0.292	0.382	0.285	-0.959
LOC_Os01g70320.1	expressed protein	0.0447772	0.0110599	0.155464	0.68	0.524	0.786	1.88	2.57	1.26	-0.456	-1.14	1.43	0.173
LOC_Os01g70330.1	prefoldin subunit family protein, expressed	0.363472	0.63312	0.770959	0.813	0.827	0.88	0.456	0.235	0.143	-0.247	-0.0268	0.208	0.0656
LOC_Os01g70380.1	serine palmitoyltransferase 2, putative, expressed	0.32042	0.113678	0.958769	0.807	0.729	0.891	-0.571	-0.95	0.0289	0.198	0.577	-0.373	-0.402
LOC_Os01g70770.1	glutathione S-transferase, putative, expressed	0.0526017	0.450873	0.710383	0.693	0.809	0.876	1.8	0.637	0.31	-1.11	0.0496	0.687	0.377
LOC_Os01g70790.1	SRC2 protein, putative, expressed	0.0137802	0.00333816	0.0792357	0.569	0.379	0.73	0.606	0.784	0.394	-0.16	-0.338	0.446	0.052
LOC_Os01g70820.1	lumenal PsbP, putative, expressed	0.197059	0.0383968	0.092391	0.781	0.647	0.744	1.1	1.91	1.48	0.0239	-0.786	1.12	-0.362
LOC_Os01g70960.1	cytochrome c1-1, heme protein, mitochondrial precursor, putative, expressed	0.861506	0.865663	0.703158	0.855	0.843	0.876	-0.0237	-0.023	-0.052	-0.000956	-0.00168	-0.0247	0.0273
LOC_Os01g70980.1	expressed protein	0.762055	0.756429	0.265888	0.85	0.836	0.822	-0.514	0.526	1.95	1	-0.0354	0.491	-1.46
LOC_Os01g71050.1	MSP domain containing protein, putative, expressed	0.241699	0.95001	0.32772	0.792	0.848	0.835	1.46	0.075	1.2	-0.773	0.609	0.684	-0.519
LOC_Os01g71080.1	xylanase inhibitor, putative, expressed	0.361018	0.648459	0.414704	0.813	0.828	0.848	0.169	0.0828	-0.15	-0.143	-0.0574	0.0254	0.175
LOC_Os01g71094.1	basic 7S globulin 2 precursor, putative, expressed	0.0150178	0.0640476	0.22867	0.578	0.688	0.812	-1.37	-0.966	-0.592	0.638	0.234	-0.732	-0.14
LOC_Os01g71190.1	photosystem II reaction center PSB28 protein, chloroplast precursor, putative, expressed	0.67736	0.455767	0.121454	0.844	0.81	0.767	-0.682	-1.24	-2.71	-0.474	0.0793	-1.16	1.55
LOC_Os01g71200.1	RNA recognition motif containing protein, putative, expressed	0.0257534	0.00301473	0.0188726	0.632	0.366	0.564	-0.99	-1.49	-1.06	0.105	0.603	-0.884	0.176
LOC_Os01g71230.1	nascent polypeptide-associated complex subunit alpha-like protein 3, putative, expressed	0.126705	0.918946	0.0691627	0.754	0.846	0.717	-0.236	0.0147	-0.289	0.108	-0.142	-0.127	0.161
LOC_Os01g71300.1	S-formylglutathione hydrolase, putative, expressed	0.00990964	0.0411828	0.331388	0.533	0.653	0.835	0.362	0.265	0.115	-0.176	-0.0797	0.185	0.0708
LOC_Os01g71320.1	hexokinase, putative, expressed	0.103892	0.458865	0.876575	0.742	0.81	0.886	0.2	-0.0858	0.0177	-0.167	0.119	0.0331	0.0153
LOC_Os01g71350.1	glycosyl hydrolases family 17, putative, expressed	0.84936	0.36505	0.932077	0.855	0.798	0.889	0.0697	-0.34	-0.0313	-0.145	0.265	-0.0754	-0.0441
LOC_Os01g71590.1	expressed protein	0.365843	0.109646	0.11932	0.814	0.727	0.765	0.276	0.514	-0.498	-0.203	-0.441	0.0729	0.571
LOC_Os01g71670.1	glycosyl hydrolases family 17, putative, expressed	0.15176	0.730968	0.00436273	0.765	0.834	0.336	0.282	0.0639	0.677	-0.0262	0.192	0.256	-0.421
LOC_Os01g71770.1	RNA recognition motif containing protein, putative, expressed	0.0300055	0.00424391	0.0382968	0.646	0.41	0.655	-0.642	-0.945	-0.605	0.0942	0.397	-0.548	0.0572
LOC_Os01g71830.1	glycosyl hydrolases family 17, putative, expressed	0.96405	0.151242	0.217624	0.861	0.748	0.809	-0.041	-1.39	-1.17	-0.609	0.736	-0.65	0.522
LOC_Os01g72049.1	retrotransposon, putative, centromere-specific, expressed	0.00674012	0.0288356	0.0247932	0.487	0.621	0.601	-2.41	-1.8	-1.86	0.897	0.279	-1.52	0.342
LOC_Os01g72240.1	uridine 5-monophosphate synthase, putative, expressed	0.694905	0.964312	0.679188	0.845	0.848	0.874	-0.136	-0.0155	-0.144	0.0623	-0.0583	-0.0738	0.0698
LOC_Os01g72260.1	cytochrome P450, putative, expressed	0.420486	0.25417	0.0388859	0.821	0.778	0.656	0.337	-0.487	0.963	-0.134	0.69	0.203	-0.76
LOC_Os01g72430.1	NADPH quinone oxidoreductase, putative, expressed	0.698463	0.3851	0.839481	0.845	0.801	0.884	-0.514	1.17	0.268	0.746	-0.941	0.232	-0.0363
LOC_Os01g72780.1	expressed protein	0.0786312	0.0458894	0.701035	0.723	0.662	0.875	-0.499	-0.582	-0.0999	0.204	0.287	-0.295	-0.195
LOC_Os01g72790.1	cyclin-dependent kinase, putative, expressed	0.00166189	0.80404	0.530674	0.305	0.839	0.861	-1.79	0.104	-0.265	1.3	-0.591	-0.487	-0.222
LOC_Os01g72800.1	signal recognition particle receptor, putative, expressed	0.601636	0.177274	0.479204	0.838	0.757	0.856	0.437	1.18	-0.596	-0.181	-0.926	0.255	0.852
LOC_Os01g72834.1	RNA recognition motif containing protein, putative, expressed	0.00503704	0.000516796	0.199811	0.451	0.159	0.803	-0.639	-0.91	0.241	0.312	0.583	-0.327	-0.568
LOC_Os01g72860.1	MAC/Perforin domain containing protein, putative, expressed	0.00805673	0.571679	0.0798389	0.508	0.822	0.731	2.95	0.514	1.73	-1.65	0.784	1.3	-0.428
LOC_Os01g72950.1	expressed protein	0.00111906	0.175534	0.503041	0.254	0.757	0.858	0.916	0.288	-0.137	-0.649	-0.0215	0.267	0.404
LOC_Os01g72990.2	expressed protein	0.0559159	0.306809	0.245458	0.697	0.789	0.817	-1.34	-0.661	-0.758	0.647	-0.0277	-0.688	0.0691
LOC_Os01g73040.1	CBS domain-containing protein, putative, expressed	0.273352	0.0765097	0.0801818	0.799	0.701	0.731	2.03	3.48	3.43	0.203	-1.25	2.24	-1.19
LOC_Os01g73160.1	40S ribosomal protein S10, putative, expressed	0.0134763	0.000522352	0.835229	0.567	0.159	0.884	0.634	1.08	0.0445	-0.194	-0.642	0.44	0.396
LOC_Os01g73170.1	peroxidase precursor, putative, expressed	0.507949	0.452785	0.109744	0.83	0.81	0.758	0.0723	0.0823	0.186	0.0128	0.00282	0.0851	-0.101
LOC_Os01g73280.1	expressed protein	0.146093	0.939771	0.742154	0.763	0.847	0.878	-1.45	0.0709	-0.309	1.03	-0.493	-0.422	-0.112
LOC_Os01g73670.4	expressed protein	0.810303	0.515667	0.303379	0.853	0.816	0.83	0.467	-1.28	2.06	-0.154	1.59	0.312	-1.75
LOC_Os01g73880.1	eukaryotic translation initiation factor, putative, expressed	0.0186719	0.300885	0.0266668	0.601	0.788	0.61	-0.987	0.38	0.912	1.06	-0.303	0.0762	-0.836
LOC_Os01g74010.2	cyclase/dehydrase family protein, expressed	0.993449	0.994176	0.10601	0.863	0.85	0.755	0.0049	0.00435	1.04	0.257	0.258	0.262	-0.778
LOC_Os01g74190.1	radical SAM enzyme, putative, expressed	0.271682	0.174535	0.189719	0.798	0.756	0.8	0.392	0.493	0.474	-0.052	-0.153	0.34	-0.135
LOC_Os01g74280.1	TGD2, putative, expressed	0.139168	0.0137447	0.011823	0.76	0.548	0.496	1.7	3.19	3.29	0.344	-1.15	2.05	-1.24
LOC_Os01g74450.1	aquaporin protein, putative, expressed	0.00096387	0.00133632	0.000306445	0.236	0.263	0.0586	2.21	2.1	2.6	-0.48	-0.375	1.73	-0.871
LOC_Os01g74580.2	dnaJ homolog subfamily C member, putative, expressed	0.0299288	0.0123144	0.102188	0.645	0.536	0.752	0.41	0.496	0.29	-0.111	-0.197	0.299	0.00898
LOC_Os01g74650.3	cysteine synthase, mitochondrial precursor, putative, expressed	0.0211331	0.00884457	0.00325609	0.613	0.499	0.289	-0.35	-0.417	-0.496	0.0339	0.101	-0.316	0.181
LOC_Os02g01030.4	tetratricopeptide repeat domain containing protein, expressed	0.00303362	0.000143606	0.0121976	0.385	0.069	0.5	1.44	2.25	1.12	-0.239	-1.04	1.2	0.0785
LOC_Os02g01070.1	FG-GAP repeat-containing protein, putative, expressed	0.28375	0.00879965	0.372202	0.801	0.498	0.842	-0.153	-0.444	-0.126	-0.028	0.264	-0.181	-0.0549
LOC_Os02g01150.2	erythronate-4-phosphate dehydrogenase domain containing protein, expressed	0.00188651	0.000150446	0.00225802	0.322	0.0715	0.237	-0.493	-0.707	-0.479	0.0731	0.287	-0.42	0.0594
LOC_Os02g01170.1	HECT-domain domain containing protein, expressed	0.246172	0.839646	0.451216	0.793	0.841	0.853	-0.206	-0.0347	0.131	0.179	0.00719	-0.0275	-0.159
LOC_Os02g01250.1	LSM domain containing protein, expressed	0.895373	0.512269	0.111449	0.857	0.816	0.76	0.0421	-0.212	-0.548	-0.222	0.0327	-0.18	0.369
LOC_Os02g01280.1	T-complex protein, putative, expressed	0.758791	0.717977	0.709893	0.849	0.833	0.876	-0.197	-0.231	0.238	0.149	0.184	-0.0474	-0.286
LOC_Os02g01332.1	ribosomal protein L6, putative, expressed	0.606217	0.37538	0.775947	0.839	0.8	0.88	-0.698	-1.22	0.383	0.315	0.835	-0.383	-0.766
LOC_Os02g01340.2	ferredoxin--NADP reductase, chloroplast precursor, putative, expressed	0.143023	0.090016	0.0279755	0.762	0.713	0.617	0.46	0.545	0.749	-0.0218	-0.106	0.439	-0.311
LOC_Os02g01350.1	expressed protein	0.124325	0.0354067	0.728225	0.753	0.64	0.877	0.956	1.39	0.203	-0.318	-0.755	0.638	0.435
LOC_Os02g01450.1	expressed protein	0.403017	0.0770948	0.0119929	0.819	0.702	0.498	-0.657	-1.49	-2.34	-0.465	0.37	-1.12	1.22
LOC_Os02g01510.1	lactate/malate dehydrogenase, putative, expressed	0.118296	0.0415093	0.166407	0.75	0.653	0.791	-0.258	-0.355	0.225	0.161	0.258	-0.097	-0.322
LOC_Os02g01520.1	IQ calmodulin-binding motif family protein, putative, expressed	0.126461	0.584948	0.0403015	0.754	0.823	0.66	1.76	0.592	2.5	-0.547	0.62	1.21	-1.28
LOC_Os02g01560.1	40S ribosomal protein S4, putative, expressed	0.000567921	0.268013	0.00166154	0.174	0.781	0.201	0.88	0.202	0.751	-0.422	0.256	0.458	-0.293
LOC_Os02g01720.1	transmembrane protein 120A, putative, expressed	0.0019587	0.00908926	0.0314403	0.327	0.502	0.631	0.91	0.7	0.539	-0.373	-0.163	0.537	-0.00195
LOC_Os02g01740.1	U5 small nuclear ribonucleoprotein 200 kDa helicase, putative, expressed	0.133286	0.00163015	0.214099	0.757	0.288	0.808	0.19	0.507	0.154	0.0229	-0.294	0.213	0.0589
LOC_Os02g01760.1	diphosphomevalonate decarboxylase family protein, expressed	0.326217	0.421961	0.19208	0.808	0.806	0.801	0.698	0.566	0.948	-0.145	-0.0129	0.553	-0.395
LOC_Os02g01960.1	tetratricopeptide repeat domain containing protein, expressed	0.345557	0.474835	0.226077	0.811	0.812	0.812	0.406	0.304	0.53	-0.096	0.00577	0.31	-0.22
LOC_Os02g02020.1	pentatricopeptide, putative, expressed	0.00614307	0.00120446	0.0859126	0.476	0.25	0.737	-0.882	-1.15	-0.48	0.254	0.522	-0.628	-0.148
LOC_Os02g02270.1	expressed protein	0.30733	0.1459	0.0862997	0.805	0.745	0.738	-0.784	-1.15	-1.39	-0.0484	0.32	-0.832	0.561
LOC_Os02g02320.1	OsSCP6 - Putative Serine Carboxypeptidase homologue, expressed	0.727344	0.633688	0.294478	0.847	0.827	0.828	-0.378	-0.519	1.17	0.447	0.587	0.0683	-1.1
LOC_Os02g02360.1	expressed protein	0.00658255	0.0482886	0.493097	0.484	0.666	0.857	-3.44	-2.24	0.702	2.19	0.996	-1.24	-1.95
LOC_Os02g02390.1	S1 RNA binding domain containing protein, expressed	0.00851058	0.249506	0.544028	0.515	0.777	0.863	0.86	0.317	0.163	-0.525	0.0178	0.335	0.172
LOC_Os02g02400.1	catalase isozyme A, putative, expressed	0.00593376	0.000139268	0.00492996	0.471	0.0674	0.356	-0.322	-0.564	-0.332	0.0172	0.259	-0.304	0.0279
LOC_Os02g02410.1	DnaK family protein, putative, expressed	0.00138891	0.002698	0.865505	0.282	0.352	0.886	0.35	0.315	0.0135	-0.18	-0.146	0.17	0.156
LOC_Os02g02530.2	signal peptide peptidase domain containing protein, expressed	0.461384	0.380541	0.068617	0.825	0.8	0.716	0.235	-0.281	0.629	-0.0889	0.427	0.146	-0.484
LOC_Os02g02550.1	peptidyl-prolyl cis-trans isomerase, FKBP-type, putative, expressed	0.853805	0.0631823	0.0115703	0.855	0.687	0.492	0.0456	-0.509	-0.757	-0.351	0.204	-0.305	0.452
LOC_Os02g02570.1	autophagy protein 5, putative, expressed	0.299938	0.706381	0.924206	0.804	0.832	0.889	0.98	-0.347	0.0872	-0.8	0.527	0.18	0.0929
LOC_Os02g02620.1	sialyltransferase family domain containing protein, expressed	0.739242	0.255743	0.689386	0.848	0.779	0.875	-0.394	-1.39	-0.474	-0.171	0.827	-0.565	-0.0911
LOC_Os02g02700.1	AMP-binding enzyme, putative, expressed	0.78338	0.47359	0.898224	0.851	0.812	0.888	0.348	-0.92	-0.162	-0.532	0.736	-0.183	-0.0214
LOC_Os02g02840.1	ras-related protein, putative, expressed	0.501439	0.413075	0.508358	0.829	0.805	0.859	0.197	0.241	0.194	-0.0389	-0.0832	0.158	-0.0357
LOC_Os02g02860.1	glutamyl-tRNA synthetase, putative, expressed	0.610478	0.164709	0.875962	0.839	0.753	0.886	0.135	0.385	0.041	0.00563	-0.245	0.14	0.0992
LOC_Os02g02890.1	peptidyl-prolyl cis-trans isomerase, putative, expressed	0.0158511	0.00471137	0.00527746	0.584	0.423	0.367	-0.338	-0.424	-0.416	0.0433	0.13	-0.294	0.121
LOC_Os02g02960.4	histone deacetylase complex subunit SAP18, putative, expressed	0.377744	0.976891	0.0788028	0.815	0.849	0.729	-0.228	-0.00733	-0.487	0.0476	-0.173	-0.181	0.306
LOC_Os02g02990.1	translation initiation factor eIF3 subunit, putative, expressed	0.0129802	0.969091	0.326817	0.563	0.849	0.835	-1.17	-0.0151	0.394	0.971	-0.182	-0.197	-0.591
LOC_Os02g03010.1	expressed protein	0.791854	0.481396	0.00748366	0.851	0.813	0.424	0.0607	-0.164	-0.763	-0.277	-0.0525	-0.217	0.546
LOC_Os02g03050.1	dimethyladenosine transferase, putative, expressed	0.279523	0.887874	0.958222	0.8	0.844	0.891	-0.689	0.087	-0.0323	0.531	-0.246	-0.159	-0.126
LOC_Os02g03060.1	cyclin-dependent kinase A-2, putative, expressed	0.16182	0.833758	0.816854	0.769	0.841	0.883	1.68	0.239	0.264	-1.14	0.308	0.547	0.283
LOC_Os02g03070.3	SSE1, putative, expressed	0.0108814	0.713975	0.0328365	0.543	0.833	0.636	1.24	-0.148	0.981	-0.724	0.667	0.519	-0.462
LOC_Os02g03250.1	expressed protein	0.491567	0.647923	0.283386	0.828	0.828	0.826	0.118	-0.078	-0.188	-0.155	0.041	-0.037	0.151
LOC_Os02g03260.3	3-isopropylmalate dehydratase large subunit 2, putative, expressed	0.215631	0.677197	0.351894	0.786	0.83	0.839	0.736	-0.238	-0.543	-0.747	0.227	-0.0112	0.532
LOC_Os02g03330.1	expressed protein	0.00725361	0.219695	0.103016	0.496	0.77	0.753	0.796	0.305	0.42	-0.415	0.0748	0.38	-0.0395
LOC_Os02g03410.2	CAMK_CAMK_like.12 - CAMK includes calcium/calmodulin depedent protein kinases, expressed	0.838099	0.0019868	0.0173481	0.854	0.313	0.552	-0.0347	-0.704	0.478	-0.0306	0.639	-0.0653	-0.543
LOC_Os02g03440.1	LSM domain containing protein, expressed	0.710551	0.395017	0.105968	0.846	0.802	0.755	0.978	-2.28	-4.58	-2.45	0.81	-1.47	3.11
LOC_Os02g03450.1	vesicle transport v-SNARE protein, putative, expressed	0.0172242	0.00593855	0.379587	0.592	0.451	0.843	0.872	1.07	0.278	-0.317	-0.515	0.555	0.277
LOC_Os02g03470.1	tetratricopeptide repeat containing protein, putative, expressed	0.663626	0.00557662	0.740531	0.843	0.443	0.878	0.0488	-0.391	0.0371	-0.125	0.315	-0.0762	-0.113
LOC_Os02g03540.1	phosphoribosyl transferase, putative, expressed	0.0453087	0.945628	0.561048	0.681	0.847	0.864	0.386	0.0117	-0.1	-0.311	0.0625	0.0742	0.175
LOC_Os02g03730.1	SWIB/MDM2 domain containing protein, expressed	0.942472	0.767197	0.211793	0.86	0.837	0.807	0.098	-0.403	-1.77	-0.618	-0.117	-0.52	1.25
LOC_Os02g03870.1	periplasmic beta-glucosidase precursor, putative, expressed	0.634815	0.615275	0.304156	0.841	0.825	0.83	-0.906	0.96	2.01	1.42	-0.444	0.515	-1.49
LOC_Os02g03890.2	nuclear transport factor 2, putative, expressed	0.000698545	0.0892819	0.564454	0.197	0.713	0.864	-1.64	-0.622	-0.196	1.02	0.00862	-0.614	-0.418
LOC_Os02g04040.1	RecF/RecN/SMC N terminal domain containing protein, expressed	0.22131	0.157166	0.400716	0.787	0.75	0.846	0.422	0.496	0.284	-0.122	-0.195	0.3	0.0168
LOC_Os02g04050.1	chromosome segregation protein, putative, expressed	0.486691	0.230928	0.0385844	0.828	0.773	0.655	0.166	0.294	0.553	0.0872	-0.0408	0.253	-0.3
LOC_Os02g04250.3	glycosyltransferase, putative, expressed	0.38665	0.0971189	0.0333287	0.817	0.718	0.638	0.141	-0.286	0.387	-0.0802	0.346	0.0605	-0.327
LOC_Os02g04260.1	expressed protein	0.256855	0.0953876	0.386688	0.795	0.717	0.844	-1.59	-2.44	-1.19	0.283	1.14	-1.31	-0.112
LOC_Os02g04270.1	DNA polymerase V, putative, expressed	0.0215467	0.024774	0.550436	0.615	0.607	0.863	0.405	0.393	-0.0908	-0.228	-0.216	0.177	0.268
LOC_Os02g04500.2	S-adenosyl-L-methionine-dependent methyltransferase mraW, putative, expressed	0.0386837	0.155246	0.567214	0.668	0.749	0.865	1.69	1.09	0.417	-0.893	-0.288	0.799	0.382
LOC_Os02g04560.1	marker Xucw84, putative, expressed	0.000591446	0.000149193	0.00447942	0.179	0.071	0.34	1.12	1.35	0.817	-0.297	-0.529	0.822	0.00465
LOC_Os02g04650.1	activator of 90 kDa heat shock protein ATPase homolog, putative, expressed	0.0109583	0.332293	0.601205	0.544	0.793	0.868	-3.85	1.24	0.656	3.36	-1.73	-0.488	-1.14
LOC_Os02g04700.1	tRNA synthetases class II domain containing protein, expressed	0.0315743	0.00139676	0.0920918	0.65	0.268	0.743	-0.39	-0.693	0.289	0.191	0.495	-0.198	-0.488
LOC_Os02g04740.1	molybdenum cofactor synthesis protein 2 large subunit, putative, expressed	0.0176146	0.383125	0.0955721	0.595	0.801	0.747	-1.26	-0.399	-0.809	0.641	-0.217	-0.616	0.193
LOC_Os02g05030.1	sucrose-phosphatase, putative, expressed	0.00861959	0.00945314	0.0177339	0.516	0.506	0.555	-3.7	-3.64	-3.21	1.06	1	-2.64	0.572
LOC_Os02g05310.4	splicing factor 3B subunit 1, putative, expressed	0.261443	0.539713	0.0334408	0.796	0.819	0.639	-0.148	0.079	-0.31	0.0536	-0.174	-0.0949	0.215
LOC_Os02g05330.1	DEAD-box ATP-dependent RNA helicase, putative, expressed	0.695602	0.0752701	0.543068	0.845	0.7	0.862	0.278	-1.38	0.434	-0.444	1.21	-0.167	-0.601
LOC_Os02g05340.1	proteasome/cyclosome repeat containing protein, expressed	0.0860098	0.000289887	0.019297	0.729	0.113	0.567	-0.175	-0.514	-0.258	-0.0618	0.278	-0.237	0.0209
LOC_Os02g05660.1	DEAD-box ATP-dependent RNA helicase 35A, putative, expressed	0.0140652	0.182707	0.395379	0.571	0.759	0.845	0.656	0.312	0.193	-0.365	-0.0221	0.29	0.097
LOC_Os02g05670.1	expressed protein	0.138389	0.249418	0.884108	0.76	0.777	0.887	2.82	2.14	0.261	-1.52	-0.834	1.31	1.05
LOC_Os02g05680.1	apoptosis-inducing factor 2, putative, expressed	0.793896	0.924778	0.899948	0.852	0.846	0.888	0.0884	-0.0319	-0.0425	-0.0849	0.0354	0.00351	0.046
LOC_Os02g05830.1	ribulose bisphosphate carboxylase small chain, chloroplast precursor, putative, expressed	0.524882	0.590801	0.0347015	0.832	0.823	0.643	-0.339	0.286	-1.27	0.00816	-0.617	-0.331	0.94
LOC_Os02g05870.1	expressed protein	0.152736	0.835347	0.727343	0.766	0.841	0.877	1.85	0.254	0.428	-1.22	0.38	0.634	0.206
LOC_Os02g06300.1	GTP-binding protein lepA, putative, expressed	0.518924	0.271289	0.0641815	0.831	0.782	0.71	-0.432	-0.754	-1.36	-0.203	0.119	-0.635	0.72
LOC_Os02g06410.1	CBS domain containing membrane protein, putative, expressed	0.428465	0.966464	0.0315803	0.822	0.849	0.632	-0.339	-0.0177	-1.04	-0.00934	-0.33	-0.348	0.688
LOC_Os02g06700.2	ribosomal protein, putative, expressed	0.394681	0.33162	0.0497056	0.818	0.793	0.684	0.149	0.171	-0.376	-0.163	-0.185	-0.0142	0.362
LOC_Os02g06890.1	OTU-like cysteine protease family protein, putative, expressed	0.0110024	0.18788	0.488323	0.544	0.761	0.857	-2.56	-1.15	-0.582	1.49	0.075	-1.07	-0.49
LOC_Os02g07040.2	biotin--protein ligase, putative, expressed	0.0448921	0.0106533	0.859803	0.68	0.52	0.886	1.04	1.44	-0.0818	-0.444	-0.838	0.6	0.682
LOC_Os02g07044.2	rhodanese-like domain containing protein, putative, expressed	0.170864	0.655644	0.547419	0.772	0.829	0.863	1.77	0.551	0.746	-1.01	0.217	0.768	0.0217
LOC_Os02g07070.3	RNA recognition motif family protein, expressed	0.000389657	0.115318	0.592428	0.136	0.73	0.867	-4.51	-1.44	-0.46	2.9	-0.158	-1.6	-1.14
LOC_Os02g07120.1	HEAT repeat family protein, putative, expressed	0.466793	0.566658	0.201266	0.826	0.821	0.804	-0.277	0.217	-0.503	0.137	-0.358	-0.141	0.362
LOC_Os02g07230.1	porphobilinogen deaminase, chloroplast precursor, putative, expressed	0.0118709	0.0149683	0.0077489	0.553	0.557	0.429	-0.573	-0.547	-0.621	0.138	0.112	-0.435	0.186
LOC_Os02g07260.1	phosphoglycerate kinase protein, putative, expressed	0.000241056	0.00032574	0.217343	0.101	0.122	0.809	0.728	0.698	0.166	-0.33	-0.3	0.398	0.232
LOC_Os02g07490.1	glyceraldehyde-3-phosphate dehydrogenase, putative, expressed	0.000107697	0.000147064	0.00147803	0.0562	0.0703	0.189	0.624	0.599	0.432	-0.21	-0.185	0.414	-0.0185
LOC_Os02g07680.4	cytochrome P450, putative, expressed	0.39503	0.365184	0.774741	0.818	0.798	0.88	0.164	0.175	0.0542	-0.0657	-0.0768	0.0984	0.0442
LOC_Os02g07720.2	cytidylyltransferase domain containing protein, expressed	0.528177	0.298198	0.897221	0.832	0.787	0.888	-0.725	1.22	0.147	0.885	-1.06	0.16	0.0135
LOC_Os02g07740.1	RNA binding protein, putative, expressed	0.115845	0.0999604	0.00857762	0.749	0.72	0.446	-1.45	-1.53	-2.78	0.0108	0.0883	-1.44	1.34
LOC_Os02g07750.1	cell cycle control protein, putative, expressed	0.35337	0.0939491	0.867371	0.812	0.716	0.886	-0.233	-0.445	-0.0409	0.0532	0.265	-0.18	-0.139
LOC_Os02g07760.2	aldehyde dehydrogenase, putative, expressed	0.286748	0.0969702	0.22722	0.801	0.718	0.812	0.431	0.705	0.494	-0.0239	-0.297	0.408	-0.0861
LOC_Os02g07790.1	serine/threonine-protein kinase HT1, putative, expressed	0.48234	0.409419	0.790422	0.827	0.804	0.881	-0.489	-0.578	0.183	0.268	0.357	-0.221	-0.404
LOC_Os02g07870.1	ATP synthase, putative, expressed	0.299326	0.263073	0.147994	0.803	0.78	0.782	-0.404	-0.438	-0.58	0.0485	0.0824	-0.356	0.225
LOC_Os02g07890.2	60S ribosomal protein L27a-3, putative, expressed	0.412715	0.334147	0.00210139	0.82	0.793	0.228	0.0851	-0.101	-0.42	-0.194	-0.00783	-0.109	0.311
LOC_Os02g07910.2	fiber protein Fb15, putative, expressed	0.972157	0.234434	0.964621	0.861	0.774	0.891	0.0203	-0.722	-0.0259	-0.202	0.54	-0.182	-0.156
LOC_Os02g08120.2	calmodulin binding protein, putative, expressed	0.00080462	0.00125137	0.0166135	0.214	0.255	0.546	0.796	0.745	0.475	-0.292	-0.241	0.504	0.0289
LOC_Os02g08190.1	CYPRO4, putative, expressed	0.978883	0.644759	0.850922	0.862	0.828	0.885	0.0142	-0.25	0.101	-0.0478	0.216	-0.0335	-0.135
LOC_Os02g08380.1	CR084 protein, putative, expressed	0.220801	0.0510655	0.0585886	0.787	0.67	0.701	-1.24	-2.11	-2.03	-0.108	0.767	-1.35	0.688
LOC_Os02g08520.1	peptidase, T1 family, putative, expressed	0.820868	0.204435	0.417202	0.853	0.766	0.848	-0.0676	0.396	0.247	0.211	-0.253	0.144	-0.103
LOC_Os02g09100.1	isoleucyl-tRNA synthetase, cytoplasmic, putative, expressed	0.394409	0.919739	0.0957776	0.818	0.846	0.747	-1.1	0.128	-2.29	0.287	-0.945	-0.817	1.48
LOC_Os02g09170.1	sucrose-phosphate synthase, putative, expressed	0.860151	0.507117	0.211581	0.855	0.815	0.807	-0.162	-0.616	1.2	0.267	0.721	0.105	-1.09
LOC_Os02g09260.2	cytochrome P450 71A1, putative, expressed	0.847311	0.096715	0.85543	0.855	0.718	0.885	0.12	-1.12	-0.113	-0.398	0.841	-0.278	-0.165
LOC_Os02g09359.1	BRASSINOSTEROID INSENSITIVE 1-associated receptor kinase 1 precursor, putative, expressed	0.020734	0.229898	0.024676	0.611	0.773	0.6	0.922	-0.425	-0.887	-1.02	0.328	-0.0976	0.79
LOC_Os02g09590.1	ribosome, putative, expressed	0.00863873	0.0014306	0.090365	0.517	0.271	0.742	0.552	0.746	-0.314	-0.306	-0.5	0.246	0.56
LOC_Os02g09750.1	lycopene beta cyclase, chloroplast precursor, putative, expressed	0.590983	0.966861	0.605889	0.837	0.849	0.868	-0.143	0.011	-0.137	0.0756	-0.0782	-0.0672	0.0698
LOC_Os02g09770.4	abhydrolase domain-containing protein FAM108C1, putative, expressed	0.00964173	0.125085	0.0100505	0.529	0.735	0.471	0.373	0.193	0.37	-0.139	0.0407	0.234	-0.136
LOC_Os02g09890.1	protein kinase PKN/PRK1, effector, putative, expressed	0.0342179	0.137941	0.220521	0.657	0.742	0.81	-1.57	-1.02	-0.828	0.711	0.169	-0.854	-0.0261
LOC_Os02g09900.1	transposon protein, putative, unclassified, expressed	0.0417819	0.626886	0.858687	0.674	0.826	0.885	3.26	0.692	0.252	-2.21	0.357	1.05	0.798
LOC_Os02g09940.1	peroxiredoxin, putative, expressed	0.491003	0.702871	0.610417	0.828	0.832	0.868	0.844	-0.463	-0.621	-0.904	0.403	-0.0599	0.561
LOC_Os02g10070.2	citrate synthase, putative, expressed	0.682295	0.310417	0.58868	0.844	0.789	0.867	0.0397	0.101	-0.0526	-0.0177	-0.0788	0.022	0.0745
LOC_Os02g10080.1	zinc finger C-x8-C-x5-C-x3-H type family protein, expressed	0.00855168	0.0107258	0.0254368	0.515	0.52	0.604	-1.52	-1.46	-1.22	0.473	0.409	-1.05	0.168
LOC_Os02g10220.1	heat shock protein DnaJ, putative, expressed	0.0443509	0.00106673	0.00149438	0.679	0.236	0.19	-0.248	-0.499	-0.475	-0.0578	0.194	-0.305	0.169
LOC_Os02g10310.1	fumarylacetoacetase, putative, expressed	0.469164	0.23275	0.577845	0.826	0.773	0.866	0.145	-0.246	-0.111	-0.198	0.193	-0.0529	0.0581
LOC_Os02g10390.3	chlorophyll A-B binding protein, putative, expressed	0.0157023	0.00142392	0.0625079	0.583	0.271	0.707	0.355	-0.54	-0.254	-0.465	0.43	-0.11	0.145
LOC_Os02g10480.6	stromal membrane-associated protein, putative, expressed	0.0254069	0.481559	0.473295	0.63	0.813	0.855	-2.72	-0.749	-0.764	1.66	-0.31	-1.06	-0.295
LOC_Os02g10520.1	OsSub12 - Putative Subtilisin homologue, expressed	0.0131512	0.225369	0.00443562	0.564	0.772	0.339	-0.852	-0.361	-1.04	0.288	-0.202	-0.563	0.477
LOC_Os02g10640.1	26S protease regulatory subunit, putative, expressed	0.372447	0.0255881	0.136172	0.815	0.61	0.776	0.115	-0.326	0.2	-0.118	0.324	-0.00275	-0.203
LOC_Os02g10780.1	SPX domain containing protein, putative, expressed	0.874117	0.529392	0.696034	0.856	0.818	0.875	0.207	0.829	-0.511	-0.0756	-0.698	0.131	0.642
LOC_Os02g10810.1	protein of unknown function domain containing protein, expressed	0.207319	0.0246963	0.887093	0.784	0.607	0.887	0.394	-0.779	0.0424	-0.48	0.693	-0.0856	-0.128
LOC_Os02g10860.1	bZIP transcription factor domain containing protein, expressed	0.0125292	0.134024	0.671434	0.559	0.74	0.873	1.42	-0.756	-0.202	-1.31	0.873	0.117	0.318
LOC_Os02g10920.6	zinc finger family protein, putative, expressed	0.0188707	0.0130799	0.00222881	0.602	0.542	0.236	-0.402	-0.434	-0.593	0.045	0.0766	-0.357	0.235
LOC_Os02g10970.3	peptidyl-prolyl cis-trans isomerase, putative, expressed	0.0139274	0.015211	0.00309979	0.57	0.558	0.282	-3.05	-3	-4.01	0.539	0.485	-2.52	1.49
LOC_Os02g11030.3	50S ribosomal protein L19, chloroplast precursor, putative, expressed	0.000730328	0.0243859	0.0339052	0.203	0.606	0.64	0.757	0.41	0.38	-0.37	-0.0234	0.387	0.00695
LOC_Os02g11050.1	26S protease regulatory subunit, putative, expressed	0.691213	0.0101982	0.372985	0.845	0.515	0.842	0.0464	-0.364	0.106	-0.0993	0.311	-0.053	-0.159
LOC_Os02g11740.1	plastidic ATP/ADP-transporter, putative, expressed	0.0672948	0.637094	0.5237	0.711	0.827	0.861	0.231	0.0542	-0.0737	-0.178	-0.00146	0.0528	0.126
LOC_Os02g11780.1	transcription factor S-II, central domain containing protein, expressed	0.00102328	0.2618	0.192256	0.243	0.78	0.801	-3.48	0.881	1.04	3.09	-1.27	-0.391	-1.43
LOC_Os02g11820.3	GTPase-activating protein, putative, expressed	0.952033	0.0773775	0.77645	0.86	0.702	0.881	-0.0831	2.67	0.393	0.829	-1.93	0.746	0.352
LOC_Os02g11830.2	coatomer subunit beta, putative, expressed	0.147398	0.0865945	0.0610328	0.764	0.71	0.705	0.36	0.436	0.485	-0.0394	-0.116	0.32	-0.165
LOC_Os02g12130.1	cysteine-rich receptor-like protein kinase 35 precursor, putative, expressed	0.886865	0.755343	0.0479689	0.857	0.836	0.68	-0.399	0.876	-6.22	-1.04	-2.31	-1.44	4.79
LOC_Os02g12570.1	pre-mRNA cleavage complex II protein Clp1, putative, expressed	0.000121731	0.0144126	0.00911408	0.0615	0.553	0.455	-1.21	-0.572	-0.625	0.606	-0.0291	-0.601	0.0245
LOC_Os02g12580.1	OsPP2Ac-3 - Phosphatase 2A isoform 3 belonging to family 1, expressed	0.27088	0.851392	0.762151	0.798	0.842	0.88	-1.4	-0.23	-0.371	0.896	-0.27	-0.499	-0.128
LOC_Os02g12650.2	puromycin-sensitive aminopeptidase, putative, expressed	0.0575671	0.0278444	0.586593	0.7	0.618	0.866	-0.359	-0.431	0.0932	0.184	0.257	-0.174	-0.267
LOC_Os02g12730.3	beta-galactosidase precursor, putative, expressed	0.254354	0.707047	0.160034	0.795	0.832	0.788	1.48	0.472	1.86	-0.526	0.481	0.952	-0.907
LOC_Os02g12794.3	elongation factor 1-gamma, putative, expressed	0.690102	0.317573	0.730442	0.845	0.791	0.877	0.262	-0.672	0.226	-0.308	0.626	-0.0461	-0.272
LOC_Os02g12800.2	elongation factor 1-gamma, putative, expressed	0.530349	0.321465	0.120944	0.832	0.791	0.766	0.0737	-0.118	-0.193	-0.133	0.0589	-0.0594	0.134
LOC_Os02g12850.1	RNA recognition motif containing protein, expressed	6.56e-05	6.06e-05	0.00121279	0.0373	0.033	0.168	-0.571	-0.577	-0.383	0.189	0.194	-0.383	-0.000128
LOC_Os02g13110.2	serine/threonine protein phosphatase 2A 55 kDa regulatory subunit B, putative, expressed	0.62858	0.324857	0.447662	0.84	0.792	0.852	-0.305	-0.635	-0.484	-0.0507	0.279	-0.356	0.128
LOC_Os02g13270.1	Mpv17 / PMP22 family domain containing protein, expressed	0.59959	0.262189	0.986647	0.838	0.78	0.892	-0.67	-1.47	0.0212	0.14	0.943	-0.531	-0.552
LOC_Os02g13840.1	citrate synthase, putative, expressed	0.0013219	0.000585789	0.129862	0.276	0.17	0.772	0.656	0.739	0.24	-0.247	-0.33	0.409	0.169
LOC_Os02g13970.2	Complex I intermediate-associated protein 30 domain containing protein, putative, expressed	0.449075	0.0278123	0.583801	0.824	0.618	0.866	-0.87	-2.87	-0.625	-0.222	1.78	-1.09	-0.467
LOC_Os02g13990.1	U2 small nuclear ribonucleoprotein A, putative, expressed	0.00483712	0.00600282	0.0202041	0.446	0.452	0.574	-0.497	-0.478	-0.377	0.159	0.14	-0.338	0.0394
LOC_Os02g14059.1	ribosomal protein L5, putative, expressed	0.00200688	0.000896049	0.000732243	0.33	0.215	0.12	-1.05	-1.18	-1.22	0.185	0.321	-0.862	0.356
LOC_Os02g14110.1	aminotransferase, classes I and II, domain containing protein, expressed	0.0632643	0.557201	0.0870573	0.707	0.82	0.738	1.47	0.424	1.33	-0.663	0.382	0.806	-0.526
LOC_Os02g14160.1	peroxidase precursor, putative, expressed	0.0541793	0.0959574	0.0314701	0.695	0.718	0.631	-0.18	-0.151	-0.207	0.0454	0.0168	-0.134	0.0723
LOC_Os02g14180.1	peroxidase precursor, putative, expressed	0.236335	0.178328	0.0716788	0.791	0.758	0.721	1.15	1.32	1.84	-0.0697	-0.242	1.08	-0.764
LOC_Os02g14760.2	CID11, putative, expressed	0.612631	0.237788	0.706538	0.839	0.775	0.876	-0.88	-2.12	-0.652	-0.0331	1.21	-0.913	-0.261
LOC_Os02g14770.3	phosphoenolpyruvate carboxylase, putative, expressed	0.657957	0.0746575	0.915313	0.842	0.7	0.889	-0.0615	-0.27	-0.0147	-0.0251	0.184	-0.0866	-0.0719
LOC_Os02g14860.1	prefoldin subunit, putative, expressed	0.958288	0.00125499	0.531692	0.861	0.255	0.861	-0.0366	3.12	0.442	0.917	-2.24	0.881	0.439
LOC_Os02g14929.1	T-complex protein, putative, expressed	0.615517	0.0598007	0.0877642	0.839	0.683	0.739	-0.18	0.742	0.66	0.485	-0.436	0.306	-0.355
LOC_Os02g15090.1	glutelin, putative, expressed	0.640016	0.675761	0.555659	0.841	0.83	0.864	-1.19	1.06	-1.5	0.779	-1.46	-0.406	1.09
LOC_Os02g15310.1	RNA recognition motif containing protein, expressed	0.00170514	0.000490729	0.184001	0.309	0.154	0.798	-1.38	-1.66	-0.454	0.508	0.787	-0.875	-0.42
LOC_Os02g15660.1	tetratricopeptide repeat, putative, expressed	0.0082437	0.000177503	0.324173	0.511	0.081	0.834	0.715	1.29	0.222	-0.159	-0.732	0.556	0.334
LOC_Os02g15750.1	expressed protein	0.126556	0.0443694	0.00299004	0.754	0.659	0.276	-0.283	-0.392	-0.674	-0.0542	0.055	-0.338	0.337
LOC_Os02g15810.1	HMG1/2, putative, expressed	0.00463167	0.000142683	0.0963812	0.44	0.0687	0.747	0.882	1.48	0.44	-0.183	-0.776	0.699	0.26
LOC_Os02g16620.1	reticulon domain containing protein, putative, expressed	0.295544	0.13969	0.00931852	0.803	0.743	0.459	0.249	0.363	0.735	0.0878	-0.026	0.337	-0.398
LOC_Os02g16640.1	proline-rich protein HaeIII subfamily 1 precursor, putative, expressed	0.694033	0.288615	0.31371	0.845	0.785	0.832	0.654	-1.82	-1.72	-1.37	1.1	-0.72	0.998
LOC_Os02g17320.3	uridine/cytidine kinase-like 1, putative, expressed	0.000265538	0.00106767	0.000412019	0.107	0.236	0.0759	1.57	1.29	1.48	-0.487	-0.205	1.09	-0.395
LOC_Os02g17390.1	3-hydroxyacyl-CoA dehydrogenase, putative, expressed	0.000238296	0.000581677	0.00265003	0.0998	0.169	0.258	0.453	0.401	0.319	-0.16	-0.107	0.293	-0.0254
LOC_Os02g17870.1	microfibrillar-associated protein 1, putative, expressed	0.618426	0.00236643	0.80936	0.84	0.335	0.883	-0.392	3.16	-0.189	1.04	-2.51	0.644	0.833
LOC_Os02g17910.1	CK1_CaseinKinase_1.4 - CK1 includes the casein kinase 1 kinases, expressed	0.00259634	0.0143457	0.00281258	0.364	0.552	0.267	3.08	2.27	3.04	-0.983	-0.17	2.1	-0.943
LOC_Os02g18380.1	60S ribosomal protein L27-3, putative, expressed	0.00447336	0.000332879	0.00172368	0.436	0.123	0.205	-0.89	-1.32	-1.04	0.0776	0.508	-0.813	0.227
LOC_Os02g18410.1	salt stress root protein RS1, putative, expressed	0.00137021	0.00189524	0.00707696	0.28	0.307	0.415	-0.756	-0.719	-0.576	0.243	0.206	-0.513	0.0636
LOC_Os02g18450.1	GTP-binding protein typA/bipA, putative, expressed	0.215878	0.271173	0.00257737	0.786	0.782	0.254	-0.187	-0.165	-0.576	-0.045	-0.0673	-0.232	0.344
LOC_Os02g18550.1	40S ribosomal protein S3a, putative, expressed	0.0191832	0.182909	0.994512	0.603	0.759	0.893	0.344	0.175	0.000859	-0.214	-0.0449	0.13	0.129
LOC_Os02g18830.1	ribosome biogenesis protein NEP1, putative, expressed	0.00114979	0.00105475	0.023858	0.258	0.234	0.596	-0.777	-0.787	-0.452	0.273	0.283	-0.504	-0.0518
LOC_Os02g18850.1	OsPOP5 - Putative Prolyl Oligopeptidase homologue, expressed	0.278604	0.863428	0.604948	0.8	0.843	0.868	1.18	0.182	0.55	-0.703	0.297	0.478	-0.0714
LOC_Os02g19330.2	expressed protein	0.0712966	0.0613012	0.969011	0.716	0.685	0.891	-1.2	-1.26	-0.0236	0.583	0.637	-0.622	-0.598
LOC_Os02g19770.1	eukaryotic translation initiation factor 1A, putative, expressed	0.530699	0.381446	0.706624	0.832	0.801	0.876	0.526	-0.742	-0.313	-0.658	0.609	-0.132	0.181
LOC_Os02g19860.1	pre-mRNA-splicing factor ATP-dependent RNA helicase, putative, expressed	0.444064	0.00519621	0.0815201	0.823	0.435	0.733	-0.0971	0.442	-0.237	0.124	-0.415	0.0269	0.264
LOC_Os02g20394.1	dnaJ domain containing protein, expressed	0.163378	0.0236999	0.0217194	0.77	0.603	0.583	1.03	1.83	1.87	0.156	-0.651	1.18	-0.687
LOC_Os02g20410.1	GTP binding protein, putative, expressed	0.114856	0.196871	0.0220935	0.748	0.764	0.586	0.779	0.622	1.23	-0.121	0.0354	0.658	-0.572
LOC_Os02g20490.1	expressed protein	0.675656	0.106539	0.0479541	0.844	0.725	0.68	-0.0519	-0.215	-0.274	-0.0833	0.0797	-0.135	0.139
LOC_Os02g20930.1	apoptosis inhibitor 5, putative, expressed	0.00182142	0.000681141	0.609093	0.317	0.185	0.868	0.463	0.537	-0.0566	-0.227	-0.301	0.236	0.292
LOC_Os02g21460.2	uncharacterized protein yqjG, putative, expressed	0.00160031	0.000344026	0.0259022	0.3	0.126	0.607	-0.983	-1.23	-0.591	0.282	0.529	-0.701	-0.11
LOC_Os02g21660.1	L1P family of ribosomal proteins domain containing protein, expressed	0.110505	0.0473294	0.769175	0.746	0.664	0.88	-0.552	-0.716	-0.0945	0.212	0.375	-0.341	-0.246
LOC_Os02g21970.1	26S protease regulatory subunit 6B, putative, expressed	0.0150482	0.127513	0.190748	0.578	0.737	0.8	0.295	-0.166	0.14	-0.227	0.233	0.0672	-0.0724
LOC_Os02g22190.1	glycosyltransferase, putative, expressed	0.211274	0.132861	0.574229	0.785	0.739	0.865	-1.19	-1.47	-0.518	0.4	0.671	-0.794	-0.277
LOC_Os02g22260.1	fruit protein PKIWI502, putative, expressed	0.148803	0.104378	0.676849	0.764	0.723	0.874	-1.56	-1.78	-0.426	0.618	0.842	-0.943	-0.517
LOC_Os02g22370.1	expressed protein	0.480224	0.000395286	0.00766596	0.827	0.137	0.428	0.501	3.69	2.31	1.12	-2.06	1.63	-0.688
LOC_Os02g23890.2	protein transporter, putative, expressed	0.407873	0.09804	0.0171443	0.819	0.719	0.551	0.188	-0.398	0.628	-0.0833	0.503	0.104	-0.524
LOC_Os02g24080.5	SNARE domain containing protein, putative, expressed	0.34379	0.408364	0.331574	0.811	0.804	0.835	1.04	-0.902	-1.07	-1.27	0.67	-0.233	0.835
LOC_Os02g24134.2	Sec1 family transport protein, putative, expressed	0.89046	0.0519537	0.903726	0.857	0.672	0.888	0.114	1.79	-0.0997	0.337	-1.34	0.451	0.551
LOC_Os02g24354.1	pyridoxal-dependent decarboxylase protein, putative, expressed	0.795065	0.491977	0.606571	0.852	0.814	0.868	-0.11	-0.294	0.219	0.0636	0.248	-0.0462	-0.265
LOC_Os02g24614.1	DNA-directed RNA polymerase subunit beta, putative, expressed	0.0386835	0.571359	0.856146	0.668	0.822	0.885	0.82	-0.2	0.0634	-0.649	0.371	0.171	0.108
LOC_Os02g24632.1	photosystem II 44 kDa reaction center protein, putative, expressed	0.0948797	0.426387	0.0309932	0.736	0.806	0.629	1.02	0.454	1.39	-0.301	0.261	0.715	-0.674
LOC_Os02g24634.1	photosystem II D2 protein, putative, expressed	0.970449	0.0202869	0.0128271	0.861	0.588	0.508	0.00492	-0.362	-0.398	-0.194	0.173	-0.189	0.209
LOC_Os02g25230.1	expressed protein	0.148396	0.135837	0.0398188	0.764	0.741	0.659	0.676	0.7	1.03	-0.0755	-0.1	0.6	-0.425
LOC_Os02g25880.1	retrotransposon protein, putative, unclassified, expressed	0.239213	0.0669063	0.212415	0.791	0.691	0.808	-0.573	-0.946	-0.61	0.0408	0.414	-0.532	0.0779
LOC_Os02g26349.2	transposon protein, putative, CACTA, En/Spm sub-class, expressed	0.313733	0.00455585	0.119995	0.806	0.418	0.766	-0.276	0.965	-0.444	0.337	-0.903	0.0613	0.505
LOC_Os02g26650.3	delta14-sterol reductase, putative, expressed	0.1155	0.0730986	0.0718072	0.748	0.698	0.721	-1.46	-1.7	-1.71	0.243	0.483	-1.22	0.492
LOC_Os02g26660.2	exonuclease, putative, expressed	0.630351	0.222351	0.488965	0.84	0.771	0.857	-0.449	1.18	0.651	0.795	-0.836	0.346	-0.305
LOC_Os02g26984.1	expressed protein	0.0223139	0.000517622	0.961941	0.618	0.159	0.891	-1.02	-1.94	-0.0182	0.276	1.2	-0.745	-0.727
LOC_Os02g27030.1	cysteine proteinase 1 precursor, putative, expressed	0.255498	0.0483917	0.120096	0.795	0.666	0.766	0.151	-0.283	-0.213	-0.237	0.197	-0.0864	0.127
LOC_Os02g27060.2	high mobility group, putative, expressed	0.0413456	0.00619052	0.180544	0.673	0.456	0.796	-2.34	-3.49	-1.43	0.527	1.68	-1.82	-0.384
LOC_Os02g27110.1	expressed protein	0.00156301	0.00619314	0.019963	0.297	0.456	0.572	4.28	3.41	2.72	-1.68	-0.81	2.6	-0.113
LOC_Os02g27950.2	ataxin-2 related protein, putative, expressed	0.00727424	0.869311	0.247976	0.496	0.843	0.818	-2.76	-0.136	0.992	2.28	-0.34	-0.476	-1.47
LOC_Os02g28340.1	transferase family protein, putative, expressed	0.163831	0.366817	0.54176	0.77	0.798	0.862	1.04	-0.653	-0.436	-1.05	0.641	-0.012	0.424
LOC_Os02g28980.1	peptidyl-prolyl isomerase, putative, expressed	0.320717	0.411982	0.194133	0.807	0.805	0.801	0.938	0.768	1.25	-0.199	-0.0286	0.74	-0.513
LOC_Os02g29320.1	expressed protein	0.073877	0.0678727	0.509977	0.718	0.693	0.859	-2.32	-2.38	-0.788	0.948	1.01	-1.37	-0.583
LOC_Os02g29400.1	expressed protein	0.473481	0.952775	0.689723	0.827	0.848	0.875	1.69	-0.138	0.934	-1.07	0.76	0.622	-0.311
LOC_Os02g29480.1	RNA-binding protein-like, putative, expressed	0.0117025	0.119626	0.00174805	0.551	0.732	0.206	-0.34	-0.186	-0.472	0.0904	-0.0635	-0.25	0.223
LOC_Os02g30050.1	ribosomal protein L29, putative, expressed	0.552568	0.493837	0.00811571	0.834	0.814	0.437	-0.139	0.161	-0.759	-0.0452	-0.345	-0.184	0.575
LOC_Os02g30140.2	expressed protein	0.247505	0.653787	0.196763	0.793	0.828	0.802	-1.8	0.676	2.03	2.03	-0.45	0.226	-1.8
LOC_Os02g30180.1	ZOS2-07 - C2H2 zinc finger protein, expressed	0.0380647	0.0062307	0.899334	0.666	0.457	0.888	0.386	0.563	0.0207	-0.144	-0.32	0.242	0.222
LOC_Os02g30310.3	ThiF family domain containing protein, putative, expressed	0.11224	0.0164667	0.0918221	0.747	0.567	0.743	-0.3	-0.5	-0.322	0.0196	0.22	-0.28	0.0411
LOC_Os02g30460.1	uncharacterized protein MJ0304, putative, expressed	0.201858	0.0783469	0.236011	0.782	0.703	0.814	-1.11	-1.6	-1.03	0.177	0.668	-0.936	0.0909
LOC_Os02g30620.3	dnaJ domain containing protein, expressed	0.245391	0.118546	0.239647	0.793	0.732	0.815	-0.989	-1.37	-1	0.148	0.531	-0.841	0.161
LOC_Os02g30630.2	thiamine pyrophosphate enzyme, C-terminal TPP binding domain containing protein, expressed	0.842861	0.00304996	0.0157079	0.854	0.368	0.538	0.037	-0.723	-0.537	-0.343	0.418	-0.306	0.231
LOC_Os02g31160.1	transcription factor, putative, expressed	0.682588	0.321472	0.042705	0.844	0.791	0.667	0.185	-0.46	-1.03	-0.512	0.133	-0.327	0.706
LOC_Os02g32030.1	elongation factor, putative, expressed	0.0228038	0.830801	0.0274381	0.62	0.841	0.614	0.276	-0.0222	0.264	-0.146	0.152	0.13	-0.135
LOC_Os02g32120.1	cytochrome b-c1 complex subunit Rieske, mitochondrial precursor, putative, expressed	0.635757	0.423381	0.409141	0.841	0.806	0.847	0.219	0.375	0.387	0.0261	-0.13	0.246	-0.142
LOC_Os02g32200.1	thioesterase family protein, putative, expressed	0.00250412	0.00434864	0.00559473	0.36	0.413	0.376	1.08	0.987	0.945	-0.328	-0.234	0.753	-0.192
LOC_Os02g32430.2	WD domain, G-beta repeat domain containing protein, expressed	0.00599254	0.99711	0.596131	0.472	0.85	0.867	-2.24	0.00235	0.347	1.77	-0.476	-0.474	-0.821
LOC_Os02g32469.2	expressed protein	0.747483	0.47923	0.00310712	0.849	0.812	0.282	-0.111	-0.247	1.33	0.354	0.49	0.243	-1.09
LOC_Os02g32490.1	AMP-binding enzyme, putative, expressed	0.0132475	0.24352	0.425639	0.565	0.776	0.85	0.545	0.222	0.149	-0.316	0.00691	0.229	0.0804
LOC_Os02g32520.1	ERD1 protein, chloroplast precursor, putative, expressed	0.240735	0.0444654	0.700771	0.792	0.659	0.875	-0.383	-0.711	0.121	0.14	0.468	-0.243	-0.364
LOC_Os02g32530.1	SAM domain family protein, expressed	0.0469612	0.756496	0.257657	0.684	0.836	0.82	0.363	-0.0505	0.191	-0.237	0.176	0.126	-0.0651
LOC_Os02g32530.3	SAM domain family protein, expressed	0.613987	0.198042	0.118906	0.839	0.764	0.765	-0.748	-1.99	-2.46	-0.552	0.688	-1.3	1.16
LOC_Os02g32750.1	glycosyltransferase, putative, expressed	0.0470862	0.0329576	0.221977	0.684	0.633	0.81	-2.45	-2.68	-1.4	0.818	1.05	-1.63	-0.232
LOC_Os02g32780.1	pentatricopeptide, putative, expressed	0.16202	0.078765	0.166373	0.769	0.704	0.791	-2.12	-2.76	-2.1	0.377	1.01	-1.74	0.353
LOC_Os02g32814.1	heavy metal-associated domain containing protein, expressed	0.0952016	0.051882	0.146896	0.736	0.672	0.781	0.264	0.317	0.225	-0.0626	-0.116	0.202	-0.0235
LOC_Os02g32980.1	Cupin domain containing protein, expressed	0.109787	0.509988	0.307626	0.745	0.816	0.831	-0.936	-0.362	0.571	0.754	0.181	-0.182	-0.753
LOC_Os02g33010.1	expressed protein	0.0169665	0.95476	0.000432754	0.591	0.848	0.0791	1.08	0.0216	1.98	-0.307	0.748	0.769	-1.21
LOC_Os02g33110.1	glycosyl hydrolases, putative, expressed	0.843943	0.96549	0.228235	0.854	0.848	0.812	-0.0321	-0.00704	-0.204	-0.0288	-0.0538	-0.0609	0.144
LOC_Os02g33180.1	rar1, putative, expressed	0.281982	0.0595408	0.546077	0.8	0.683	0.863	0.306	0.576	-0.168	-0.128	-0.397	0.178	0.346
LOC_Os02g33450.1	peroxiredoxin, putative, expressed	0.000731625	0.000268074	0.000657984	0.203	0.108	0.11	-1.21	-1.39	-1.23	0.252	0.435	-0.957	0.271
LOC_Os02g33500.1	threonyl-tRNA synthetase, putative, expressed	0.0956163	0.0172265	0.677609	0.736	0.571	0.874	0.37	-0.577	0.0854	-0.4	0.547	-0.0306	-0.116
LOC_Os02g33610.1	metallo-beta-lactamase, putative, expressed	0.909278	0.0273776	0.00626838	0.858	0.617	0.395	-0.0136	-0.304	-0.409	-0.168	0.122	-0.182	0.227
LOC_Os02g33860.1	WD domain, G-beta repeat domain containing protein, expressed	0.000367317	0.0517354	0.0613412	0.131	0.671	0.705	-2.2	0.9	0.858	2.09	-1.01	-0.111	-0.969
LOC_Os02g34560.2	plant neutral invertase domain containing protein, expressed	0.681595	0.00547023	0.165443	0.844	0.441	0.79	-0.491	-4.18	-1.75	-1.11	2.58	-1.6	0.141
LOC_Os02g34630.1	MYB family transcription factor, putative, expressed	0.440446	0.598716	0.04907	0.823	0.824	0.682	0.457	0.309	1.28	0.0556	0.204	0.512	-0.771
LOC_Os02g34810.1	OsAPx8 - Thylakoid-bound Ascorbate Peroxidase encoding gene 5,8, expressed	0.445216	0.109456	0.262208	0.824	0.727	0.821	0.203	0.451	0.304	0.0365	-0.212	0.24	-0.0645
LOC_Os02g34884.1	SacI homology domain containing protein, expressed	0.704838	0.0128769	0.724525	0.846	0.541	0.877	-0.0768	-0.605	-0.0714	-0.111	0.416	-0.188	-0.117
LOC_Os02g35039.1	NAD dependent epimerase/dehydratase family protein, putative, expressed	0.000880958	0.0151576	0.418845	0.225	0.558	0.849	0.499	0.308	0.0874	-0.275	-0.0841	0.224	0.136
LOC_Os02g35060.1	RNA methyltransferase protein, putative, expressed	0.794047	0.933019	0.312057	0.852	0.847	0.832	-0.248	-0.0798	0.989	0.413	0.245	0.165	-0.823
LOC_Os02g35100.2	DDT domain containing protein, putative, expressed	0.181277	0.00694872	0.190652	0.776	0.47	0.8	0.875	2.09	0.855	0.0806	-1.14	0.956	0.101
LOC_Os02g35130.2	AIG1, putative, expressed	0.0409314	0.745556	0.781836	0.673	0.835	0.881	-1.95	-0.274	0.234	1.45	-0.223	-0.497	-0.731
LOC_Os02g35170.2	uncharacterized oxidoreductase yoxD, putative, expressed	0.174609	0.559723	0.706396	0.774	0.82	0.876	0.997	-0.41	-0.263	-0.916	0.491	0.0809	0.344
LOC_Os02g35470.4	calmodulin binding protein, putative, expressed	0.000375146	0.000216051	0.00350756	0.133	0.0934	0.301	0.965	1.04	0.689	-0.291	-0.367	0.674	-0.0153
LOC_Os02g35500.1	NAD binding domain of 6-phosphogluconate dehydrogenase containing protein, expressed	0.525232	0.277369	0.938993	0.832	0.783	0.89	0.144	0.251	-0.0171	-0.0492	-0.157	0.0943	0.111
LOC_Os02g35590.3	glutathione S-transferase, putative, expressed	0.853692	0.00098355	0.442789	0.855	0.226	0.852	-0.136	-3.4	-0.573	-0.891	2.37	-1.03	-0.453
LOC_Os02g35610.1	expressed protein	0.428573	0.514221	0.289264	0.822	0.816	0.827	0.71	-0.581	-0.964	-0.918	0.372	-0.209	0.755
LOC_Os02g35620.1	expressed protein	0.0083499	0.0129331	0.188959	0.513	0.541	0.8	2.42	2.23	1.03	-1	-0.808	1.42	0.392
LOC_Os02g35630.1	AAA family ATPase, putative, expressed	0.24048	0.867522	0.857044	0.792	0.843	0.885	1.36	-0.186	-0.201	-1.12	0.43	0.244	0.444
LOC_Os02g35750.2	pentatricopeptide repeat domain containing protein, putative, expressed	0.302484	0.0445503	0.685961	0.804	0.659	0.874	1.51	3.22	0.577	-0.185	-1.89	1.33	0.749
LOC_Os02g35970.1	BTBN2 - Bric-a-Brac, Tramtrack, Broad Complex BTB domain with non-phototropic hypocotyl 3 NPH3 and coiled-coil domains, expressed	0.00862917	0.00167267	0.104299	0.516	0.291	0.754	0.724	0.954	0.392	-0.206	-0.437	0.518	0.125
LOC_Os02g36110.1	cytochrome P450, putative, expressed	0.206346	0.00168581	0.712537	0.783	0.292	0.876	0.571	-1.84	0.16	-0.848	1.56	-0.277	-0.437
LOC_Os02g36850.1	oxygen evolving enhancer protein 3, identical, putative, expressed	0.39987	0.401002	0.398114	0.818	0.803	0.846	0.415	0.414	-0.417	-0.312	-0.311	0.103	0.52
LOC_Os02g36974.4	14-3-3 protein, putative, expressed	0.36918	0.0125788	0.288931	0.814	0.538	0.827	-0.727	-2.38	-0.866	-0.266	1.39	-0.993	-0.127
LOC_Os02g37060.1	photosystem II 5 kDa protein, chloroplast precursor, putative, expressed	0.408391	0.762511	0.957154	0.819	0.836	0.891	0.746	-0.268	-0.0475	-0.638	0.376	0.108	0.155
LOC_Os02g37420.1	ras-related protein, putative, expressed	0.442363	0.669425	0.176375	0.823	0.83	0.795	-0.421	-0.231	0.768	0.45	0.26	0.029	-0.739
LOC_Os02g37430.1	LSM domain containing protein, expressed	0.474668	0.0429696	0.0383561	0.827	0.656	0.655	-0.302	-0.95	-0.978	-0.256	0.393	-0.558	0.421
LOC_Os02g37470.1	tetratricopeptide repeat containing protein, putative, expressed	0.360264	0.881789	0.454815	0.813	0.844	0.853	-1.46	-0.231	1.18	1.33	0.104	-0.127	-1.31
LOC_Os02g37590.1	glycerophosphoryl diester phosphodiesterase family protein, putative, expressed	0.781896	0.960092	0.0270043	0.851	0.848	0.612	0.0317	0.00572	-0.292	-0.0955	-0.0695	-0.0637	0.229
LOC_Os02g37690.1	UDP-glucoronosyl and UDP-glucosyl transferase, putative, expressed	0.532714	0.455667	0.21697	0.832	0.81	0.809	-0.38	-0.457	-0.778	-0.0235	0.0532	-0.404	0.374
LOC_Os02g37880.3	cyclin G-associated kinase, putative, expressed	0.00170487	0.376377	0.462573	0.309	0.8	0.854	-5.25	-1.12	-0.921	3.43	-0.706	-1.82	-0.902
LOC_Os02g37940.2	CRP12 - Cysteine-rich family protein precursor, expressed	0.844291	0.883368	0.219379	0.855	0.844	0.81	0.358	0.267	2.34	0.382	0.473	0.74	-1.6
LOC_Os02g38200.1	dehydrogenase, putative, expressed	0.331175	0.0955971	0.720025	0.809	0.717	0.877	0.456	0.826	0.164	-0.0947	-0.464	0.362	0.197
LOC_Os02g38210.1	elongation factor Tu, putative, expressed	0.0551294	0.307785	0.337539	0.696	0.789	0.836	0.262	-0.129	0.121	-0.199	0.193	0.0636	-0.0574
LOC_Os02g38220.1	eukaryotic translation initiation factor 4B, putative, expressed	0.801121	0.00266419	0.196836	0.852	0.35	0.802	-0.145	2.28	0.779	0.874	-1.55	0.729	-0.0503
LOC_Os02g38250.1	EMB1745, putative, expressed	0.358164	0.61355	0.294247	0.813	0.825	0.828	-0.851	-0.46	-0.978	0.279	-0.112	-0.572	0.406
LOC_Os02g38300.2	SNF7 domain containing protein, putative, expressed	0.109364	0.0771954	0.0213908	0.745	0.702	0.581	0.489	0.549	-0.764	-0.42	-0.48	0.0685	0.832
LOC_Os02g38340.1	actin, putative, expressed	0.00600761	0.00447883	0.00644636	0.473	0.416	0.4	0.573	0.603	0.566	-0.137	-0.168	0.435	-0.13
LOC_Os02g38430.1	steroid nuclear receptor, ligand-binding, putative, expressed	0.592284	0.561059	0.164586	0.837	0.821	0.79	0.747	-0.811	-2.03	-1.27	0.287	-0.524	1.51
LOC_Os02g38440.1	oxidoreductase, short chain dehydrogenase/reductase family, putative, expressed	0.709398	0.775767	0.21275	0.846	0.837	0.808	0.235	-0.179	0.819	-0.0165	0.398	0.219	-0.6
LOC_Os02g38820.1	expressed protein	0.00910002	0.0154867	0.0349501	0.523	0.56	0.644	0.854	0.77	0.642	-0.288	-0.203	0.566	-0.0752
LOC_Os02g38840.2	glucose-6-phosphate 1-dehydrogenase, cytoplasmic isoform, putative, expressed	0.000741718	0.262897	0.000767027	0.204	0.78	0.124	0.636	0.153	0.633	-0.28	0.202	0.355	-0.277
LOC_Os02g38920.1	glyceraldehyde-3-phosphate dehydrogenase, putative, expressed	0.000177495	0.000615575	0.000401866	0.0816	0.174	0.0743	0.852	0.718	0.763	-0.269	-0.135	0.583	-0.179
LOC_Os02g39040.1	mTERF domain containing protein, expressed	0.00187524	0.00361561	0.00363338	0.321	0.389	0.307	1.09	0.981	0.98	-0.328	-0.218	0.763	-0.217
LOC_Os02g39140.1	helix-loop-helix DNA-binding domain containing protein, expressed	0.293971	0.842743	0.813191	0.802	0.841	0.883	-0.432	-0.0793	0.0945	0.328	-0.025	-0.104	-0.199
LOC_Os02g39160.1	hydroxymethylbutenyl 4-diphosphate synthase, putative, expressed	0.19791	0.169218	0.906932	0.781	0.755	0.888	-1.59	-1.71	-0.138	0.732	0.851	-0.861	-0.723
LOC_Os02g39300.1	RNA-binding protein Luc7-like, putative, expressed	0.484007	0.000524453	0.0533339	0.828	0.16	0.691	0.113	0.808	-0.344	0.0311	-0.664	0.144	0.489
LOC_Os02g39340.1	glycine-rich protein, putative, expressed	0.0093237	0.0346418	0.100822	0.525	0.638	0.751	0.55	0.416	0.306	-0.232	-0.0978	0.318	0.0119
LOC_Os02g39370.1	tRNA methyltransferase, putative, expressed	0.851624	0.647401	0.967586	0.855	0.828	0.891	-0.125	-0.307	-0.0271	0.0102	0.192	-0.115	-0.0876
LOC_Os02g39550.1	calcium-binding mitochondrial protein anon-60Da, putative, expressed	0.0205336	0.563395	0.0487195	0.61	0.821	0.681	0.319	0.0685	0.26	-0.157	0.0933	0.162	-0.0977
LOC_Os02g39560.2	non-receptor tyrosine kinase spore lysis A, putative, expressed	0.00103724	0.00179269	0.0467101	0.245	0.3	0.677	2.38	2.19	1.16	-0.948	-0.758	1.43	0.273
LOC_Os02g39570.5	ACT domain containing protein, expressed	0.875938	0.0485254	0.162264	0.856	0.666	0.789	-0.0445	-0.63	-0.421	-0.229	0.356	-0.274	0.147
LOC_Os02g39740.1	psaB translation factor, putative, expressed	0.9499	0.825712	0.782068	0.86	0.84	0.881	-0.0427	-0.15	-0.188	-0.0525	0.0546	-0.0952	0.0932
LOC_Os02g40000.4	trafficking protein particle complex subunit, putative, expressed	0.528221	0.650598	0.777301	0.832	0.828	0.881	-0.637	-0.455	0.283	0.435	0.253	-0.202	-0.486
LOC_Os02g40430.1	HEAT repeat family protein, putative, expressed	0.50292	0.321364	0.748013	0.83	0.791	0.879	-0.921	-1.38	0.437	0.454	0.917	-0.467	-0.904
LOC_Os02g40514.2	h/ACA ribonucleoprotein complex subunit 3, putative, expressed	0.243655	0.199608	0.07845	0.792	0.764	0.729	0.664	0.736	-1.05	-0.577	-0.65	0.0863	1.14
LOC_Os02g40830.3	succinyl-CoA ligase beta-chain, mitochondrial precursor, putative, expressed	0.00841553	0.00836401	0.0259361	0.514	0.492	0.607	-1.35	-1.35	-1.07	0.408	0.409	-0.946	0.129
LOC_Os02g40880.1	ribosomal protein L14, putative, expressed	0.623878	0.323921	0.0166055	0.84	0.792	0.546	-0.131	-0.27	-0.757	-0.158	-0.0196	-0.29	0.468
LOC_Os02g41460.1	DUF640 domain containing protein, putative, expressed	0.601823	0.933128	0.274925	0.838	0.847	0.824	-0.0948	-0.0151	-0.204	0.0164	-0.0632	-0.0784	0.125
LOC_Os02g41470.3	tRNA synthetases class II domain containing protein, expressed	0.351068	0.765655	0.216623	0.812	0.836	0.809	-0.487	-0.152	0.658	0.492	0.157	0.00463	-0.653
LOC_Os02g41590.1	kinase, pfkB family, putative, expressed	0.00302473	0.00388886	0.00515537	0.385	0.398	0.363	-0.477	-0.457	-0.436	0.134	0.115	-0.342	0.0933
LOC_Os02g41630.2	phenylalanine ammonia-lyase, putative, expressed	0.768537	0.000129328	0.000257627	0.85	0.0636	0.0499	0.0287	0.597	0.545	0.264	-0.305	0.293	-0.252
LOC_Os02g41860.4	aquaporin protein, putative, expressed	0.0530186	0.609563	0.395236	0.693	0.825	0.845	1.34	-0.319	0.537	-0.948	0.708	0.389	-0.148
LOC_Os02g41990.2	expressed protein	0.0150154	0.98051	0.00865031	0.578	0.849	0.447	-0.394	-0.00332	-0.439	0.185	-0.206	-0.209	0.23
LOC_Os02g42290.1	OsClp3 - Putative Clp protease homologue, expressed	0.000165185	0.0319414	0.0116851	0.0774	0.631	0.494	1.01	0.417	0.518	-0.521	0.0683	0.485	-0.0325
LOC_Os02g42300.1	expressed protein	0.180308	0.106017	0.0811083	0.776	0.724	0.732	1.98	2.45	2.68	-0.204	-0.672	1.78	-0.9
LOC_Os02g42310.1	OsSCP8 - Putative Serine Carboxypeptidase homologue, expressed	0.181337	0.488548	0.119819	0.776	0.813	0.766	-0.401	-0.2	-0.476	0.132	-0.0691	-0.269	0.206
LOC_Os02g42320.2	peptidase, T1 family, putative, expressed	0.00196702	0.0294728	0.00764172	0.328	0.623	0.427	-1.08	-0.649	-0.857	0.432	0.00307	-0.646	0.211
LOC_Os02g42406.1	DEAD-box ATP-dependent RNA helicase, putative, expressed	0.451014	0.0181423	0.150482	0.824	0.577	0.783	0.384	1.4	0.765	0.253	-0.762	0.637	-0.128
LOC_Os02g42450.1	RIPER1 - Ripening-related family protein precursor, expressed	0.478268	0.332241	0.00384341	0.827	0.793	0.316	-0.216	-0.299	1.12	0.367	0.45	0.151	-0.968
LOC_Os02g42570.1	ferredoxin-thioredoxin reductase, variable chain, putative, expressed	0.00816065	0.00672248	0.00167391	0.51	0.466	0.202	-0.588	-0.61	-0.768	0.0969	0.118	-0.491	0.277
LOC_Os02g42580.1	vacuolar protein-sorting protein bro1, putative, expressed	0.0217508	0.0115261	0.218617	0.616	0.528	0.809	-1.12	-1.28	-0.538	0.388	0.546	-0.736	-0.198
LOC_Os02g42960.1	thylakoid lumenal protein, putative, expressed	0.189437	0.577892	0.995711	0.778	0.822	0.893	0.312	0.127	-0.00122	-0.203	-0.0176	0.11	0.111
LOC_Os02g43350.1	OsFtsH7 FtsH protease, homologue of AtFtsH7, expressed	0.986866	0.0155501	0.152017	0.862	0.561	0.784	0.0136	-2.38	-1.26	-0.92	1.48	-0.906	0.35
LOC_Os02g43500.1	OR, putative, expressed	0.231743	0.151673	0.652058	0.79	0.748	0.872	0.736	-0.898	-0.268	-0.843	0.791	-0.108	0.16
LOC_Os02g43600.1	50S ribosomal protein L19, chloroplast precursor, putative, expressed	0.257761	0.180707	0.177192	0.796	0.758	0.795	-0.206	-0.247	-0.25	0.0303	0.0716	-0.176	0.0738
LOC_Os02g43670.1	transferase family protein, putative, expressed	0.0780723	0.841437	0.0851672	0.722	0.841	0.736	-1.68	-0.175	-1.64	0.81	-0.699	-0.874	0.764
LOC_Os02g43720.1	enoyl-CoA hydratase/isomerase family protein, putative, expressed	0.330065	0.200903	0.9189	0.808	0.765	0.889	0.703	0.942	0.0715	-0.274	-0.513	0.429	0.358
LOC_Os02g43930.3	chaperone protein dnaJ, putative, expressed	0.539957	0.734756	0.563521	0.833	0.834	0.864	0.212	0.116	0.2	-0.08	0.0156	0.132	-0.0676
LOC_Os02g44080.1	aquaporin protein, putative, expressed	0.709077	0.951734	0.802181	0.846	0.848	0.882	0.253	-0.0409	-0.17	-0.242	0.0515	0.0107	0.18
LOC_Os02g44108.1	expansin precursor, putative, expressed	0.758031	0.973899	0.704656	0.849	0.849	0.876	0.535	-0.0567	-0.66	-0.581	0.0115	-0.0453	0.615
LOC_Os02g44111.2	sec20 domain containing protein, expressed	0.871279	0.70702	0.0257979	0.856	0.832	0.606	0.155	-0.362	2.48	0.412	0.929	0.568	-1.91
LOC_Os02g44320.1	LTPL113 - Protease inhibitor/seed storage/LTP family protein precursor, expressed	0.94906	0.845752	0.256247	0.86	0.842	0.82	-0.0757	-0.231	1.4	0.348	0.503	0.272	-1.12
LOC_Os02g44330.1	rho guanine nucleotide exchange factor, putative, expressed	0.00877559	0.00223548	0.0132129	0.518	0.328	0.512	0.451	0.571	0.417	-0.0916	-0.211	0.36	-0.0572
LOC_Os02g44510.1	UDP-glucose glycoprotein glucosyltransferase 1 precursor, putative, expressed	0.000253874	0.583496	0.63041	0.104	0.823	0.87	1.8	-0.178	0.156	-1.36	0.623	0.445	0.289
LOC_Os02g44520.1	OsSub19 - Putative Subtilisin homologue, expressed	0.21867	0.439953	0.721969	0.787	0.808	0.877	-0.301	-0.184	-0.0836	0.159	0.0418	-0.142	-0.0585
LOC_Os02g44540.5	expressed protein	0.106972	0.575912	0.898706	0.743	0.822	0.888	1.78	-0.579	-0.131	-1.52	0.848	0.269	0.399
LOC_Os02g44630.1	aquaporin protein, putative, expressed	0.921813	0.0479625	0.828825	0.859	0.665	0.884	0.0107	-0.242	-0.0236	-0.0744	0.178	-0.0637	-0.0401
LOC_Os02g44670.1	harpin-induced protein 1 domain containing protein, expressed	0.0120848	0.798868	0.921779	0.555	0.839	0.889	2.69	-0.226	-0.087	-2.09	0.819	0.593	0.68
LOC_Os02g44690.1	HSPC171 protein, putative, expressed	0.00141677	0.00082685	0.0152038	0.284	0.206	0.533	0.65	0.705	0.43	-0.204	-0.258	0.446	0.0161
LOC_Os02g44810.1	tRNA pseudouridine synthase family protein, putative, expressed	0.123458	0.133737	0.312897	0.753	0.74	0.832	-2.19	-2.13	-1.38	0.767	0.701	-1.42	-0.0444
LOC_Os02g44860.1	GDSL-like lipase/acylhydrolase, putative, expressed	0.3929	0.416118	0.871653	0.817	0.805	0.886	-0.495	-0.47	0.0917	0.277	0.252	-0.218	-0.31
LOC_Os02g44930.1	HMG1/2, putative, expressed	0.019724	0.00392168	0.00935907	0.606	0.4	0.459	-1.15	-1.55	-1.33	0.138	0.546	-1.01	0.323
LOC_Os02g45344.1	O-acyltransferase, putative, expressed	0.735321	0.143705	0.258679	0.848	0.744	0.82	0.384	1.76	1.33	0.484	-0.893	0.868	-0.459
LOC_Os02g45540.1	synthase, putative, expressed	0.00769544	0.0628745	0.249947	0.503	0.687	0.818	-0.506	-0.316	-0.183	0.255	0.0642	-0.251	-0.0681
LOC_Os02g45640.1	expressed protein	0.940184	0.0811287	0.0302148	0.86	0.706	0.626	0.0327	0.83	-1.08	-0.0881	-0.885	-0.0555	1.03
LOC_Os02g45650.1	peptidase, putative, expressed	0.428262	0.41747	0.818455	0.822	0.805	0.883	-0.495	-0.507	0.141	0.28	0.292	-0.215	-0.356
LOC_Os02g45820.1	mitochondrial import inner membrane translocase subunit Tim, putative, expressed	0.928727	0.304399	0.420525	0.859	0.788	0.849	0.127	-1.51	-1.17	-0.764	0.87	-0.637	0.531
LOC_Os02g45920.1	expressed protein	0.110618	0.0586876	0.158775	0.746	0.681	0.787	-1.64	-2.01	-1.43	0.373	0.737	-1.27	0.158
LOC_Os02g46130.1	tRNA synthetases class II domain containing protein, expressed	0.0503281	0.00353454	0.287662	0.689	0.386	0.827	-0.22	-0.38	-0.11	0.0424	0.203	-0.178	-0.0673
LOC_Os02g46510.1	adaptor complexes medium subunit family domain containing protein, expressed	0.129874	0.0080887	0.064915	0.756	0.488	0.711	-0.245	-0.495	-0.308	-0.0173	0.233	-0.262	0.0463
LOC_Os02g46962.3	VHS and GAT domain containing protein, expressed	0.000349795	0.0450917	0.413661	0.128	0.66	0.848	-4.18	-1.76	-0.65	2.53	0.112	-1.65	-0.998
LOC_Os02g46990.1	AAA-type ATPase family protein, putative, expressed	0.480871	0.589114	0.975617	0.827	0.823	0.892	-0.193	0.147	-0.00825	0.179	-0.161	-0.0136	-0.00531
LOC_Os02g47010.1	secretory carrier-associated membrane protein, putative, expressed	0.13174	0.77997	0.272187	0.757	0.837	0.823	-1.88	0.327	-1.33	1.16	-1.05	-0.719	0.607
LOC_Os02g47170.1	expressed protein	0.0244373	0.0404001	0.00471588	0.627	0.651	0.349	1.23	1.09	1.69	-0.226	-0.0869	1	-0.69
LOC_Os02g47350.1	oxidoreductase, short chain dehydrogenase/reductase family, putative, expressed	0.229863	0.638151	0.905787	0.789	0.827	0.888	1.51	0.57	0.143	-0.952	-0.015	0.555	0.412
LOC_Os02g47600.2	soluble inorganic pyrophosphatase, putative, expressed	0.383771	0.769538	0.493573	0.816	0.837	0.857	-2.09	-0.689	-1.63	0.986	-0.412	-1.1	0.526
LOC_Os02g47760.1	AAA-type ATPase family protein, putative, expressed	0.560638	0.85027	0.329357	0.835	0.842	0.835	0.378	0.121	0.644	-0.0918	0.164	0.286	-0.358
LOC_Os02g47780.1	hydrolase, alpha/beta fold family domain containing protein, expressed	0.0519354	0.352116	0.0549484	0.692	0.796	0.694	3.33	1.46	3.28	-1.31	0.556	2.02	-1.26
LOC_Os02g47800.1	monodehydroascorbate reductase, putative, expressed	0.535611	0.560575	0.16665	0.833	0.821	0.791	0.16	0.15	0.372	0.0109	0.0207	0.17	-0.202
LOC_Os02g47850.2	class I glutamine amidotransferase, putative, expressed	0.733784	0.493574	0.459692	0.848	0.814	0.854	-0.491	-0.998	1.08	0.389	0.896	-0.102	-1.18
LOC_Os02g47860.2	uridine kinase, putative, expressed	0.0621566	0.0638059	0.835526	0.705	0.688	0.884	-1.89	-1.88	-0.19	0.902	0.887	-0.99	-0.799
LOC_Os02g47880.2	tetratricopeptide repeat domain containing protein, expressed	0.000375232	0.00841478	0.449569	0.133	0.493	0.852	0.557	0.341	-0.0807	-0.353	-0.137	0.204	0.285
LOC_Os02g48110.1	DnaK family protein, putative, expressed	0.480587	0.203268	0.00687254	0.827	0.766	0.41	-0.0903	-0.168	-0.426	-0.0808	-0.00282	-0.171	0.255
LOC_Os02g48130.1	uncharacterized protein At1g26090, chloroplast precursor, putative, expressed	0.0150036	0.501036	0.610807	0.578	0.815	0.869	0.495	0.116	0.0875	-0.321	0.0585	0.175	0.0873
LOC_Os02g48190.1	expressed protein	0.863234	0.0111781	0.741948	0.856	0.525	0.878	0.137	-2.44	0.262	-0.648	1.93	-0.511	-0.773
LOC_Os02g48290.1	thioredoxin reductase 2, putative, expressed	0.935824	0.886244	0.614725	0.86	0.844	0.869	0.0267	0.0475	0.168	0.0339	0.0131	0.0607	-0.108
LOC_Os02g48350.1	diacylglycerol O-acyltransferase, putative, expressed	0.764212	0.816379	0.223098	0.85	0.84	0.811	0.21	0.162	0.888	0.105	0.153	0.315	-0.573
LOC_Os02g48360.1	pyrophosphate--fructose 6-phosphate 1-phosphotransferase subunit alpha, putative, expressed	0.0588187	0.108259	0.894137	0.701	0.726	0.887	0.449	0.37	0.0285	-0.237	-0.158	0.212	0.183
LOC_Os02g48390.1	phosphoribosyl transferase, putative, expressed	0.230514	0.0793685	0.070165	0.789	0.704	0.719	0.17	-0.262	0.272	-0.125	0.307	0.0451	-0.227
LOC_Os02g48480.1	expressed protein	0.886474	0.43082	0.182052	0.857	0.807	0.797	-0.0227	0.127	-0.223	-0.00694	-0.157	-0.0296	0.194
LOC_Os02g48590.1	expressed protein	0.00162174	0.0131981	0.465405	0.302	0.543	0.854	0.747	0.519	-0.129	-0.463	-0.235	0.284	0.413
LOC_Os02g48600.1	expressed protein	0.0852899	0.0409532	0.890987	0.728	0.652	0.887	1.97	2.42	-0.144	-0.905	-1.36	1.06	1.21
LOC_Os02g48620.2	tetratricopeptide repeat, putative, expressed	0.00671139	0.00111061	0.0152549	0.486	0.241	0.534	0.516	0.692	0.441	-0.104	-0.28	0.412	-0.0287
LOC_Os02g48660.1	60S ribosomal protein L31, putative, expressed	0.00957471	0.00174454	0.564811	0.529	0.296	0.865	0.658	0.879	-0.121	-0.304	-0.525	0.354	0.475
LOC_Os02g48720.2	mitochondrial carrier protein, putative, expressed	0.489927	0.454493	0.418418	0.828	0.81	0.849	0.0954	-0.104	0.112	-0.0694	0.13	0.0261	-0.0864
LOC_Os02g48790.4	AML1, putative, expressed	0.00827822	0.00410168	0.418568	0.512	0.405	0.849	-2.36	-2.68	-0.597	0.954	1.27	-1.41	-0.812
LOC_Os02g48840.1	dual specificity protein phosphatase, putative, expressed	0.720918	0.830677	0.235043	0.847	0.841	0.814	-0.176	0.105	0.609	0.311	0.029	0.134	-0.474
LOC_Os02g48870.1	aspartic proteinase nepenthesin-2 precursor, putative, expressed	0.00569814	0.0030841	0.0101197	0.466	0.369	0.472	-1.09	-1.21	-0.984	0.27	0.391	-0.822	0.161
LOC_Os02g48900.2	aspartic proteinase nepenthesin-1 precursor, putative, expressed	0.133593	0.00333475	0.0026294	0.758	0.379	0.257	-0.196	-0.469	-0.487	-0.0917	0.181	-0.288	0.199
LOC_Os02g49050.2	transmembrane 9 superfamily member, putative, expressed	0.117624	0.0459643	0.126453	0.75	0.662	0.77	-1.6	-2.14	-1.56	0.277	0.815	-1.33	0.234
LOC_Os02g49070.1	ZAC, putative, expressed	0.00139077	0.239576	0.126635	0.282	0.775	0.77	-2.83	0.789	1.05	2.58	-1.04	-0.247	-1.3
LOC_Os02g49150.5	RNA polymerase Rpb4, putative, expressed	0.93107	0.926557	0.0590547	0.859	0.846	0.702	-0.133	0.142	-3.22	-0.671	-0.945	-0.804	2.42
LOC_Os02g49190.1	SWI/SNF-related matrix-associated actin-dependent regulator of chromatin subfamily B member 1, putative, expressed	0.658732	0.338361	0.497851	0.843	0.794	0.858	-0.662	-1.47	-1.02	-0.126	0.678	-0.788	0.236
LOC_Os02g49326.1	SET domain-containing protein, putative, expressed	0.267781	0.0731295	0.878074	0.798	0.698	0.887	-1.85	-3.16	-0.247	0.531	1.85	-1.31	-1.07
LOC_Os02g49360.1	RNA methyltransferase domain-containing protein 2, putative, expressed	0.000731955	0.000161786	0.0617287	0.203	0.0754	0.706	-3.37	-4.15	-1.44	1.13	1.91	-2.24	-0.797
LOC_Os02g49370.2	histone-like transcription factor and archaeal histone, putative, expressed	0.00202795	0.214665	0.764424	0.332	0.769	0.88	8.93	2.8	-0.648	-6.16	-0.0272	2.77	3.42
LOC_Os02g49680.1	arsenate reductase, putative, expressed	0.0054939	0.000150954	0.383748	0.462	0.0717	0.844	0.359	0.615	0.0911	-0.093	-0.348	0.266	0.175
LOC_Os02g49720.3	aldehyde dehydrogenase, putative, expressed	0.915969	0.742467	0.0442129	0.858	0.835	0.671	0.112	-0.351	2.41	0.431	0.894	0.543	-1.87
LOC_Os02g49980.1	ADP-ribosylation factor, putative, expressed	0.780997	0.800539	0.0636572	0.851	0.839	0.709	-0.0383	0.0348	-0.282	-0.0331	-0.106	-0.0714	0.211
LOC_Os02g50010.1	APO, putative, expressed	0.773239	0.0479518	0.96095	0.85	0.665	0.891	-0.0692	-0.531	-0.0117	-0.0839	0.378	-0.153	-0.141
LOC_Os02g50240.1	glutamine synthetase, catalytic domain containing protein, expressed	0.0170433	0.0117509	0.0547133	0.591	0.531	0.694	-2.97	-3.21	-2.25	0.866	1.1	-2.11	0.143
LOC_Os02g50350.2	dihydroorotate dihydrogenase protein, putative, expressed	0.337285	0.725042	0.454102	0.81	0.834	0.853	0.476	0.17	-0.367	-0.406	-0.101	0.0697	0.437
LOC_Os02g50570.1	retrotransposon protein, putative, unclassified, expressed	0.693544	0.036312	0.365534	0.845	0.642	0.841	-0.217	1.3	0.507	0.616	-0.906	0.399	-0.108
LOC_Os02g50620.1	dehydrogenase E1 component domain containing protein, expressed	0.821238	0.230882	0.0321692	0.853	0.773	0.634	0.0312	-0.172	0.338	0.0181	0.221	0.0493	-0.289
LOC_Os02g50760.2	heat shock protein DnaJ, putative, expressed	0.000381634	0.000634923	0.00388874	0.134	0.177	0.318	0.957	0.891	0.673	-0.327	-0.261	0.63	-0.043
LOC_Os02g50790.2	nuclear-pore anchor, putative, expressed	0.409136	0.307152	0.789936	0.819	0.789	0.881	-0.137	-0.171	-0.0433	0.049	0.0831	-0.0877	-0.0444
LOC_Os02g50799.1	nuclear-pore anchor, putative, expressed	0.435867	0.137779	0.263349	0.823	0.742	0.821	-0.199	0.397	0.291	0.321	-0.275	0.122	-0.169
LOC_Os02g50830.1	expressed protein	0.234597	0.676676	0.327812	0.79	0.83	0.835	0.823	0.278	0.668	-0.38	0.164	0.442	-0.226
LOC_Os02g50840.2	BAH domain containing protein, putative, expressed	0.646982	0.408967	0.0145031	0.842	0.804	0.526	-0.289	0.528	1.83	0.807	-0.00974	0.518	-1.31
LOC_Os02g50880.1	OsDegp3 - Putative Deg protease homologue, expressed	0.0481484	0.234593	0.970252	0.686	0.774	0.891	0.491	-0.274	-0.00825	-0.439	0.326	0.0521	0.0604
LOC_Os02g51040.1	expansin precursor, putative, expressed	0.618749	0.634478	0.0823445	0.84	0.827	0.733	0.543	-0.518	2.06	-0.0229	1.04	0.52	-1.54
LOC_Os02g51070.1	starch synthase, putative, expressed	0.833853	0.913915	0.314279	0.854	0.846	0.832	-0.0612	0.0315	0.302	0.129	0.0366	0.0681	-0.234
LOC_Os02g51100.1	arsenical pump-driving ATPase, putative, expressed	0.832655	0.312757	0.113089	0.854	0.79	0.761	-0.174	-0.853	-1.4	-0.433	0.246	-0.606	0.792
LOC_Os02g51430.1	SEC6, putative, expressed	0.213385	0.0154952	0.131019	0.785	0.56	0.773	1.24	2.75	1.54	0.142	-1.37	1.38	-0.156
LOC_Os02g51570.1	peptidyl-prolyl cis-trans isomerase, FKBP-type, putative, expressed	0.13764	0.993624	0.00820299	0.759	0.85	0.438	0.223	0.00113	-0.46	-0.282	-0.0601	-0.059	0.401
LOC_Os02g51610.1	CRAL/TRIO domain containing protein, expressed	0.157303	0.581705	0.0144304	0.768	0.822	0.526	-1.09	-0.404	-2.13	0.184	-0.501	-0.905	1.22
LOC_Os02g51620.1	glycosyl hydrolase family 3 protein, putative, expressed	0.63028	0.524744	0.615913	0.84	0.817	0.869	-0.492	0.653	-0.513	0.404	-0.741	-0.0879	0.425
LOC_Os02g51750.1	annexin, putative, expressed	0.803755	0.221633	0.141146	0.852	0.771	0.778	0.0353	-0.181	-0.222	-0.127	0.089	-0.0919	0.13
LOC_Os02g51830.1	tRNA synthetase class II core domain containing protein, expressed	0.186088	0.548614	0.102816	0.777	0.819	0.753	0.312	-0.136	-0.396	-0.367	0.0812	-0.0549	0.341
LOC_Os02g52040.1	phosphate-induced protein 1 conserved region domain containing protein, expressed	0.339069	0.33819	0.311547	0.81	0.794	0.832	0.647	-0.648	0.687	-0.476	0.82	0.171	-0.516
LOC_Os02g52140.1	RNA recognition motif containing protein, putative, expressed	0.00574585	0.00952295	0.451675	0.467	0.507	0.853	-2.8	-2.55	-0.614	1.31	1.06	-1.49	-0.876
LOC_Os02g52140.2	RNA recognition motif containing protein, putative, expressed	0.0410033	0.0631187	0.464981	0.673	0.687	0.854	-2.41	-2.15	-0.775	1.08	0.814	-1.33	-0.56
LOC_Os02g52290.1	peptidyl-prolyl cis-trans isomerase, FKBP-type, putative, expressed	0.175415	0.625414	0.559361	0.774	0.826	0.864	1.71	0.587	-0.704	-1.31	-0.19	0.398	1.1
LOC_Os02g52360.1	peptidyl-prolyl cis-trans isomerase CYP40, putative, expressed	0.0156696	0.0408333	0.787598	0.583	0.652	0.881	1.28	1.03	-0.12	-0.73	-0.48	0.545	0.665
LOC_Os02g52390.1	M16 domain containing zinc peptidase, putative, expressed	0.0292144	0.123939	0.648541	0.643	0.735	0.872	-1.98	-1.3	-0.361	1.07	0.389	-0.909	-0.548
LOC_Os02g52420.1	peptidase, M24 family protein, putative, expressed	0.00456004	0.412058	0.346401	0.438	0.805	0.838	0.526	-0.121	-0.14	-0.459	0.187	0.0661	0.206
LOC_Os02g52560.1	xyloglucan fucosyltransferase, putative, expressed	0.668861	0.546177	0.104412	0.843	0.819	0.754	0.301	0.427	1.23	0.188	0.062	0.489	-0.739
LOC_Os02g52710.1	alpha-amylase precursor, putative, expressed	0.817092	0.00176952	0.000745701	0.853	0.298	0.121	0.0654	1.19	1.36	0.589	-0.539	0.655	-0.704
LOC_Os02g52860.1	phosphate carrier protein, mitochondrial precursor, putative, expressed	0.153282	0.197126	0.1557	0.766	0.764	0.786	0.146	-0.131	0.145	-0.106	0.171	0.0402	-0.105
LOC_Os02g52880.2	ybaK/prolyl-tRNA synthetase family protein, putative, expressed	0.22021	0.0204746	0.723006	0.787	0.589	0.877	0.38	0.808	0.106	-0.0568	-0.484	0.323	0.218
LOC_Os02g52940.1	soluble inorganic pyrophosphatase, putative, expressed	0.27124	0.114746	0.467165	0.798	0.73	0.855	0.817	-1.22	-0.529	-1.05	0.984	-0.232	0.297
LOC_Os02g52950.1	expressed protein	0.0641709	0.0293312	0.213167	0.708	0.623	0.808	0.244	0.3	-0.156	-0.147	-0.203	0.0972	0.253
LOC_Os02g53060.1	peptidase, T1 family, putative, expressed	0.458835	0.232386	0.050747	0.825	0.773	0.686	-0.461	-0.762	-1.34	-0.18	0.122	-0.64	0.698
LOC_Os02g53330.2	1-aminocyclopropane-1-carboxylate deaminase, putative, expressed	0.00823275	0.568648	0.0725779	0.511	0.821	0.722	-0.79	-0.139	-0.478	0.439	-0.213	-0.352	0.126
LOC_Os02g53420.1	DnaK family protein, putative, expressed	0.905016	0.860053	0.109091	0.858	0.842	0.758	0.0156	-0.0231	-0.226	-0.0741	-0.0353	-0.0584	0.168
LOC_Os02g53490.1	cation efflux family protein, putative, expressed	0.268494	0.208889	0.155988	0.798	0.767	0.786	-1	-1.15	-1.32	0.135	0.283	-0.867	0.448
LOC_Os02g53500.2	RFC5 - Putative clamp loader of PCNA, replication factor C subunit 5, expressed	0.99371	0.519955	0.735988	0.863	0.817	0.878	0.00176	-0.145	0.0755	-0.0188	0.128	-0.017	-0.0926
LOC_Os02g53680.1	RPA1A - Putative single-stranded DNA binding complex subunit 1, expressed	0.0119065	0.149091	0.142009	0.553	0.747	0.779	-2.84	-1.43	-1.46	1.41	-0.00178	-1.43	0.0268
LOC_Os02g53770.1	tRNA synthetase class I, putative, expressed	0.0297843	0.73389	0.264417	0.645	0.834	0.822	0.303	0.0413	0.14	-0.182	0.0798	0.121	-0.0191
LOC_Os02g53860.1	OsSub22 - Putative Subtilisin homologue, expressed	0.915432	0.256881	0.469082	0.858	0.779	0.855	0.0762	-0.844	0.527	-0.136	0.784	-0.0601	-0.587
LOC_Os02g54190.1	pectinesterase, putative, expressed	0.00151399	0.00126167	0.000593716	0.293	0.256	0.102	-0.401	-0.412	-0.46	0.0825	0.0938	-0.318	0.142
LOC_Os02g54470.2	60S ribosomal protein L35a-3, putative, expressed	0.00830542	0.00177211	0.00296208	0.512	0.298	0.275	-1.27	-1.65	-1.52	0.16	0.538	-1.11	0.409
LOC_Os02g54600.1	STE_MEK_ste7_MAP2K.5 - STE kinases include homologs to sterile 7, sterile 11 and sterile 20 from yeast, expressed	0.367686	0.0625497	0.030117	0.814	0.686	0.626	-0.139	-0.31	-0.375	-0.0673	0.104	-0.206	0.169
LOC_Os02g54650.1	diacylglycerol kinase, putative, expressed	0.831734	0.444769	0.412063	0.854	0.809	0.848	0.127	-0.464	0.5	-0.0865	0.505	0.0406	-0.459
LOC_Os02g54700.2	RNA recognition motif containing protein, putative, expressed	0.00654477	0.00272654	0.112837	0.483	0.353	0.761	0.389	0.452	0.195	-0.13	-0.193	0.259	0.064
LOC_Os02g54820.3	trehalose-6-phosphate synthase, putative, expressed	0.0530093	0.00427188	0.663054	0.693	0.41	0.873	-1.51	-2.57	0.307	0.57	1.63	-0.945	-1.25
LOC_Os02g54980.1	pheophorbide a oxygenase, chloroplast precursor, putative, expressed	0.659602	0.770011	0.608973	0.843	0.837	0.868	-0.333	0.22	-0.387	0.208	-0.345	-0.125	0.262
LOC_Os02g55010.1	expressed protein	0.0737312	0.741229	0.0839675	0.718	0.835	0.735	-0.983	-0.166	-0.944	0.46	-0.358	-0.523	0.421
LOC_Os02g55260.2	DEAD-box ATP-dependent RNA helicase, putative, expressed	0.109137	0.304982	0.767512	0.745	0.789	0.88	-0.583	-0.357	0.1	0.373	0.147	-0.21	-0.31
LOC_Os02g55410.1	MCM5 - Putative minichromosome maintenance MCM complex subunit 5, expressed	0.582131	0.29883	0.347445	0.837	0.787	0.838	-0.129	-0.248	-0.223	-0.0215	0.0983	-0.15	0.0733
LOC_Os02g55420.1	aminotransferase, classes I and II, domain containing protein, expressed	0.296228	0.314867	0.543417	0.803	0.79	0.863	-0.619	-0.595	-0.353	0.228	0.203	-0.392	-0.0388
LOC_Os02g55440.2	transmembrane 9 superfamily member, putative, expressed	0.507586	0.322264	0.441297	0.83	0.792	0.851	-0.439	-0.666	0.512	0.291	0.518	-0.148	-0.66
LOC_Os02g55590.3	expressed protein	0.399427	0.828453	0.772496	0.818	0.84	0.88	0.772	0.195	0.26	-0.465	0.112	0.307	0.0466
LOC_Os02g55630.1	COBW domain containing protein, putative, expressed	0.562154	0.0418287	0.133708	0.835	0.654	0.774	0.216	-0.85	0.592	-0.227	0.84	-0.0105	-0.602
LOC_Os02g55940.1	ribosomal protein S15 containing protein, expressed	0.00173544	0.00015027	0.00388035	0.311	0.0714	0.317	-1.07	-1.52	-0.942	0.189	0.635	-0.883	0.0586
LOC_Os02g56000.2	26S protease regulatory subunit 6A, putative, expressed	0.478369	0.421983	0.928328	0.827	0.806	0.889	-0.903	-1.03	-0.113	0.392	0.516	-0.511	-0.398
LOC_Os02g56020.2	methyltransferase, putative, expressed	0.557717	0.589258	0.28092	0.835	0.823	0.825	0.471	0.433	0.887	-0.0232	0.0147	0.448	-0.439
LOC_Os02g56040.1	chaperone protein dnaJ, putative, expressed	0.000955003	0.0919654	0.0715319	0.235	0.715	0.72	0.414	0.163	0.177	-0.226	0.0253	0.189	0.0118
LOC_Os02g56110.2	AP-1 complex subunit gamma-1, putative, expressed	0.0845873	0.611155	0.615384	0.728	0.825	0.869	-0.201	0.0546	-0.054	0.151	-0.105	-0.05	0.00397
LOC_Os02g56130.1	PCNA - Putative DNA replicative polymerase clamp, expressed	0.38661	0.882354	0.224961	0.817	0.844	0.811	1.33	0.223	1.9	-0.466	0.641	0.864	-1.04
LOC_Os02g56190.1	expressed protein	0.802371	0.0424965	0.48018	0.852	0.655	0.856	0.184	-1.68	0.526	-0.427	1.44	-0.243	-0.769
LOC_Os02g56270.1	ENTH domain containing protein, expressed	0.42173	0.0798814	0.164432	0.821	0.705	0.79	0.207	0.486	0.373	0.059	-0.219	0.266	-0.106
LOC_Os02g56300.1	aminotransferase, classes I and II, domain containing protein, expressed	0.992866	0.550617	0.603369	0.862	0.82	0.868	-0.00825	-0.557	0.483	-0.0121	0.536	-0.0204	-0.504
LOC_Os02g56530.1	ankyrin repeat domain containing protein, expressed	0.19122	0.617249	0.914769	0.779	0.825	0.889	1.04	0.38	0.0809	-0.663	-0.00563	0.375	0.294
LOC_Os02g56610.1	DUF640 domain containing protein, putative, expressed	0.705414	0.502124	0.811258	0.846	0.815	0.883	-0.407	-0.728	0.256	0.187	0.509	-0.22	-0.476
LOC_Os02g56720.2	cinnamoyl CoA reductase, putative, expressed	0.000437153	0.000411317	0.00502904	0.147	0.14	0.359	3.08	3.11	2.11	-1.01	-1.03	2.07	-0.0382
LOC_Os02g56740.1	translation initiation factor eIF-2B subunit epsilon, putative, expressed	0.0243132	0.584141	0.397958	0.626	0.823	0.846	0.345	-0.0728	-0.114	-0.306	0.112	0.0397	0.153
LOC_Os02g57030.2	expressed protein	0.467611	0.120559	0.743929	0.826	0.733	0.878	-0.726	-1.64	-0.323	0.054	0.968	-0.672	-0.35
LOC_Os02g57040.1	dehydrogenase, putative, expressed	0.0641487	0.00790885	0.0178611	0.708	0.485	0.556	-0.239	-0.385	-0.328	0.00151	0.147	-0.238	0.0897
LOC_Os02g57180.1	NADH dehydrogenase 1 alpha subcomplex subunit 9,mitochondrial precursor, putative, expressed	0.0705253	0.0119265	0.000908707	0.715	0.532	0.139	-0.269	-0.411	-0.632	-0.0591	0.0829	-0.328	0.304
LOC_Os02g57240.1	oxidoreductase, aldo/keto reductase family protein, putative, expressed	0.421275	0.0928255	0.607303	0.821	0.715	0.868	-0.0678	0.151	0.0429	0.0993	-0.12	0.0315	-0.0113
LOC_Os02g57260.1	3-ketoacyl-CoA thiolase, peroxisomal precursor, putative, expressed	0.00564731	0.00534659	0.796588	0.465	0.438	0.882	0.278	0.281	0.0206	-0.133	-0.136	0.145	0.124
LOC_Os02g57280.7	CBS domain containing membrane protein, putative, expressed	0.258824	0.21519	0.110108	0.796	0.769	0.759	-1.15	-1.27	-1.68	0.122	0.243	-1.02	0.659
LOC_Os02g57450.2	Ser/Thr protein phosphatase family protein, putative, expressed	0.925966	0.131314	0.0422026	0.859	0.739	0.666	0.0229	0.398	0.566	0.224	-0.151	0.247	-0.32
LOC_Os02g57540.1	60S ribosomal protein L28-1, putative, expressed	0.00213964	0.00192002	0.0688948	0.339	0.308	0.717	1.88	1.92	0.919	-0.704	-0.736	1.18	0.26
LOC_Os02g57590.1	rRNA 2-O-methyltransferase fibrillarin 2, putative, expressed	0.514784	0.0441876	0.0342222	0.831	0.659	0.641	-1.24	-4.25	-4.53	-1.27	1.75	-2.51	2.03
LOC_Os02g57690.4	kelch repeat protein, putative, expressed	0.100686	0.980539	0.761243	0.739	0.849	0.88	-1.43	-0.0196	0.245	1.13	-0.281	-0.301	-0.546
LOC_Os02g57720.1	aquaporin protein, putative, expressed	0.639693	0.548292	0.0395996	0.841	0.819	0.658	0.408	0.525	2.02	0.33	0.213	0.738	-1.28
LOC_Os02g58020.3	ABC transporter, ATP-binding protein, putative, expressed	0.36283	0.17204	0.00148846	0.813	0.756	0.19	0.0891	0.138	0.415	0.0715	0.0228	0.161	-0.255
LOC_Os02g58070.1	oxidoreductase, putative, expressed	0.0187638	0.951979	0.107196	0.601	0.848	0.756	2.25	0.0489	1.41	-1.32	0.879	0.928	-0.484
LOC_Os02g58090.1	PSP domain containing protein, expressed	0.00099277	0.0030468	0.00399442	0.239	0.367	0.322	-0.625	-0.525	-0.502	0.212	0.112	-0.413	0.0889
LOC_Os02g58120.1	oxidoreductase/ transition metal ion binding protein, putative, expressed	0.629554	0.829021	0.343147	0.84	0.841	0.837	0.478	-0.213	0.957	-0.172	0.518	0.305	-0.651
LOC_Os02g58300.1	expressed protein	0.00904522	0.00900846	0.100865	0.522	0.501	0.751	0.267	0.268	0.148	-0.0967	-0.0969	0.171	0.0228
LOC_Os02g58310.3	expressed protein	0.0642497	0.506131	0.204649	0.708	0.815	0.805	2.72	-0.895	1.77	-1.82	1.79	0.897	-0.868
LOC_Os02g58340.1	oligopeptidase, putative, expressed	0.148125	0.125256	0.79804	0.764	0.736	0.882	-1.43	-1.53	-0.239	0.632	0.73	-0.801	-0.562
LOC_Os02g58490.1	PINHEAD, putative, expressed	0.16494	0.00447871	0.0749733	0.77	0.416	0.725	-0.797	-1.97	-1.06	-0.161	1.02	-0.958	0.103
LOC_Os02g58510.1	GHMP kinases ATP-binding protein, putative, expressed	0.0100691	0.592375	0.00034066	0.534	0.823	0.0643	0.593	0.102	1.02	-0.165	0.326	0.427	-0.588
LOC_Os02g58550.2	chloroplast channel forming outer membrane protein, putative, expressed	0.789085	0.0891015	0.70659	0.851	0.712	0.876	-0.13	0.9	-0.184	0.277	-0.754	0.146	0.33
LOC_Os02g58570.1	PRLI-interacting factor A, putative, expressed	0.0654065	0.00123931	0.086819	0.709	0.254	0.738	-0.678	1.49	-0.622	0.726	-1.44	0.0472	0.669
LOC_Os02g58650.1	expressed protein	0.000285597	0.0229874	0.0146527	0.112	0.6	0.528	-1.51	-0.727	-0.8	0.751	-0.0325	-0.759	0.0405
LOC_Os02g58720.1	peroxidase precursor, putative, expressed	0.435118	0.462912	0.990986	0.822	0.811	0.892	-0.597	-0.561	0.0085	0.31	0.273	-0.287	-0.296
LOC_Os02g58790.4	cell division inhibitor, putative, expressed	0.430926	0.503901	0.0381387	0.822	0.815	0.654	0.16	-0.135	-0.47	-0.271	0.0238	-0.111	0.358
LOC_Os03g01170.1	transporter family protein, putative, expressed	0.068953	0.108972	0.240756	0.713	0.726	0.816	-4.74	-4.09	-2.89	1.81	1.16	-2.93	-0.0412
LOC_Os03g01190.1	dehydrogenase, putative, expressed	0.484557	0.242648	0.258191	0.828	0.776	0.82	-0.445	-0.763	-0.736	-0.0411	0.277	-0.486	0.25
LOC_Os03g01222.3	formyl transferase, putative, expressed	0.484668	0.429148	0.221791	0.828	0.807	0.81	-0.549	-0.623	0.988	0.503	0.577	-0.0461	-1.03
LOC_Os03g01250.4	expressed protein	0.0450317	0.308427	0.135462	0.68	0.789	0.775	-1.77	0.822	1.25	1.84	-0.746	0.0755	-1.17
LOC_Os03g01530.1	tubulin/FtsZ domain containing protein, putative, expressed	0.00258098	0.0105465	0.00340781	0.364	0.519	0.297	0.398	0.311	0.38	-0.126	-0.0387	0.272	-0.108
LOC_Os03g01660.1	SKP1, putative, expressed	0.388016	0.221789	0.824864	0.817	0.771	0.883	-0.181	-0.261	-0.0454	0.0588	0.139	-0.122	-0.0764
LOC_Os03g01710.1	expressed protein	0.693257	0.639894	0.971786	0.845	0.827	0.891	-0.587	-0.697	-0.0524	0.253	0.363	-0.334	-0.282
LOC_Os03g01750.7	dual specificity protein phosphatase, putative, expressed	0.141063	0.174678	0.0144386	0.761	0.756	0.526	-0.458	-0.418	-0.856	0.0251	-0.0146	-0.433	0.423
LOC_Os03g01810.1	SNF7 domain containing protein, putative, expressed	0.000208884	0.000684725	0.00251924	0.0914	0.185	0.251	0.825	0.699	0.574	-0.3	-0.175	0.524	-0.0494
LOC_Os03g01830.1	DEAD-box ATP-dependent RNA helicase, putative, expressed	0.149573	0.0590517	0.928807	0.765	0.682	0.889	0.746	1.02	0.0436	-0.293	-0.569	0.453	0.409
LOC_Os03g01910.1	transcription factor BTF3, putative, expressed	0.733543	0.264133	0.704238	0.848	0.781	0.876	0.15	0.51	-0.168	-0.0273	-0.387	0.123	0.291
LOC_Os03g01970.1	THO complex subunit 1, putative, expressed	0.63132	0.615704	0.356252	0.841	0.825	0.84	0.449	0.47	0.878	0.000418	-0.0205	0.449	-0.429
LOC_Os03g02030.2	folylpolyglutamate synthase, mitochondrial precursor, putative, expressed	0.0531426	0.0604396	0.546502	0.694	0.684	0.863	-2.73	-2.63	0.77	1.58	1.48	-1.15	-1.92
LOC_Os03g02150.2	adapitin protein, putative, expressed	0.00693766	0.000199968	0.016168	0.49	0.0884	0.542	-0.431	-0.74	-0.366	0.0467	0.356	-0.384	-0.0183
LOC_Os03g02260.1	DnaK family protein, putative, expressed	0.389801	0.867711	0.00929083	0.817	0.843	0.458	-0.107	0.0202	-0.387	-0.0118	-0.139	-0.118	0.269
LOC_Os03g02390.1	mitochondrial import inner membrane translocase subunit Tim17, putative, expressed	0.44505	0.691933	0.590002	0.824	0.831	0.867	-0.225	-0.115	-0.157	0.101	-0.00911	-0.124	0.033
LOC_Os03g02420.1	KH domain containing protein, putative, expressed	0.0285149	0.487493	0.300803	0.641	0.813	0.83	1.78	0.495	0.751	-1.02	0.261	0.756	0.00496
LOC_Os03g02540.1	proteasome subunit, putative, expressed	0.947787	0.462974	0.414783	0.86	0.811	0.848	0.0909	-1.03	1.15	-0.0384	1.09	0.0525	-1.1
LOC_Os03g02730.1	expressed protein	0.000588201	0.00308696	0.510955	0.178	0.369	0.859	-4.29	-3.33	0.573	2.53	1.57	-1.76	-2.33
LOC_Os03g02750.1	OsSub25 - Putative Subtilisin homologue, expressed	0.501846	0.898949	0.814961	0.829	0.845	0.883	-0.156	-0.0291	0.0536	0.123	-0.0037	-0.0328	-0.0864
LOC_Os03g03020.1	L11 domain containing ribosomal protein, putative, expressed	0.000117086	0.00150388	0.00527092	0.0598	0.278	0.367	0.936	0.654	0.533	-0.405	-0.123	0.531	-0.0023
LOC_Os03g03360.1	ribosomal protein L5, putative, expressed	0.0455088	0.322843	0.769188	0.681	0.792	0.88	0.228	0.103	0.0298	-0.138	-0.0128	0.09	0.0603
LOC_Os03g03410.1	serine/threonine-protein kinase, putative, expressed	0.221398	0.31409	0.0201726	0.787	0.79	0.573	0.782	0.635	1.67	-0.00989	0.137	0.773	-0.9
LOC_Os03g03450.2	anthranilate phosphoribosyltransferase, chloroplast precursor, putative, expressed	0.11395	0.371867	0.402002	0.748	0.799	0.846	1.7	-0.916	0.858	-1.29	1.33	0.412	-0.446
LOC_Os03g03510.1	CAMK_KIN1/SNF1/Nim1_like.15 - CAMK includes calcium/calmodulin depedent protein kinases, expressed	0.00136881	0.00222308	0.351346	0.28	0.327	0.839	1.27	1.17	0.275	-0.587	-0.495	0.678	0.404
LOC_Os03g03600.1	fasciclin-like arabinogalactan protein, putative, expressed	0.282653	0.920462	0.695384	0.8	0.846	0.875	-1.72	-0.155	0.609	1.4	-0.162	-0.317	-0.926
LOC_Os03g03650.1	POLD2 - Putative DNA polymerase delta complex subunit, expressed	0.00608412	0.00284464	0.00129062	0.474	0.359	0.175	0.954	1.09	1.23	-0.137	-0.268	0.817	-0.411
LOC_Os03g03710.1	ribonuclease protein, putative, expressed	0.904772	0.640633	0.13508	0.858	0.827	0.775	0.144	0.563	1.91	0.511	0.0914	0.655	-1.26
LOC_Os03g03720.1	glyceraldehyde-3-phosphate dehydrogenase, putative, expressed	0.00917983	0.211894	0.386936	0.524	0.768	0.844	0.327	0.134	-0.0905	-0.235	-0.041	0.0927	0.183
LOC_Os03g03830.1	EF hand family protein, putative, expressed	0.0141955	0.447398	0.878545	0.572	0.809	0.887	-3.49	-0.918	0.182	2.43	-0.139	-1.06	-1.24
LOC_Os03g03870.1	DNA-binding bromodomain-containing protein, putative, expressed	0.207207	0.808709	0.0305482	0.784	0.839	0.628	-1.85	0.339	-3.48	0.601	-1.59	-1.25	2.23
LOC_Os03g03949.2	electron carrier/ protein disulfide oxidoreductase, putative, expressed	0.881294	0.882086	0.745744	0.857	0.844	0.879	0.166	0.165	-0.361	-0.174	-0.173	-0.00761	0.354
LOC_Os03g03980.1	coiled-coil domain-containing protein 124, putative, expressed	0.413915	0.237669	0.123006	0.82	0.775	0.768	0.993	1.47	1.97	0.114	-0.358	1.11	-0.863
LOC_Os03g03990.1	signal recognition particle 43 kDa protein, chloroplast precursor, putative, expressed	0.764346	0.0422074	0.0684406	0.85	0.655	0.716	0.0609	-0.465	-0.407	-0.264	0.262	-0.203	0.204
LOC_Os03g04000.1	AMP-binding domain containing protein, expressed	0.000157117	0.00222135	0.0221836	0.0746	0.327	0.586	0.495	0.338	0.222	-0.231	-0.0746	0.264	0.0422
LOC_Os03g04020.2	expansin precursor, putative, expressed	0.367851	0.71762	0.625431	0.814	0.833	0.87	-1.09	0.431	-0.583	0.782	-0.742	-0.312	0.272
LOC_Os03g04050.1	protein kinase family protein, putative, expressed	0.352295	0.557662	0.306144	0.812	0.82	0.831	-0.515	0.32	0.569	0.608	-0.226	0.0936	-0.476
LOC_Os03g04169.1	ATP phosphoribosyltransferase, putative, expressed	0.0253381	0.0321801	0.112152	0.63	0.631	0.76	-1.17	-1.11	-0.771	0.408	0.345	-0.762	0.00901
LOC_Os03g04220.1	glutathione S-transferase, putative, expressed	0.141369	0.0626981	0.319332	0.761	0.687	0.833	-2.3	-3.02	-1.5	0.592	1.32	-1.71	-0.203
LOC_Os03g04240.1	glutathione S-transferase, putative, expressed	0.733148	0.711601	0.0231352	0.848	0.833	0.592	0.0555	0.0602	-0.43	-0.134	-0.139	-0.0785	0.351
LOC_Os03g04250.1	glutathione S-transferase, putative, expressed	0.339184	0.143958	0.855347	0.81	0.744	0.885	-0.746	-1.18	-0.139	0.229	0.665	-0.516	-0.378
LOC_Os03g04260.1	glutathione S-transferase, putative, expressed	0.851735	0.895711	0.73214	0.855	0.845	0.878	0.0724	-0.0507	0.133	-0.0338	0.0894	0.0386	-0.0942
LOC_Os03g04400.1	heat shock protein DnaJ, putative, expressed	0.00989947	0.0115756	0.275375	0.532	0.529	0.824	1.12	1.09	0.402	-0.469	-0.436	0.654	0.252
LOC_Os03g04410.1	aconitate hydratase protein, putative, expressed	0.115482	0.0013267	0.0133526	0.748	0.262	0.514	-0.165	-0.431	-0.29	-0.0565	0.21	-0.221	0.0684
LOC_Os03g04470.1	expressed protein	0.608735	0.667803	0.781408	0.839	0.829	0.881	-1.05	0.88	-0.567	0.867	-1.07	-0.185	0.383
LOC_Os03g04580.1	expressed protein	0.00707319	0.000860883	0.0919297	0.493	0.211	0.743	4.65	6.54	2.54	-1.22	-3.11	3.43	0.894
LOC_Os03g04750.1	60S ribosomal protein L21-2, putative, expressed	0.104616	0.0262287	0.0303722	0.742	0.613	0.627	-0.345	-0.507	-0.49	0.00955	0.171	-0.335	0.154
LOC_Os03g04960.2	cysteinyl-tRNA synthetase, putative, expressed	0.156358	0.233285	0.629229	0.767	0.774	0.87	0.146	-0.121	-0.0472	-0.151	0.115	-0.00548	0.0418
LOC_Os03g04970.1	T-complex protein, putative, expressed	0.444505	0.814622	0.614387	0.823	0.84	0.869	0.695	0.21	-0.454	-0.583	-0.0972	0.113	0.567
LOC_Os03g05020.1	PIR, putative, expressed	0.801437	0.206065	0.02549	0.852	0.766	0.605	0.0607	0.319	0.624	0.19	-0.068	0.251	-0.373
LOC_Os03g05180.1	expressed protein	0.109526	0.00272746	0.564507	0.745	0.353	0.864	0.357	0.817	-0.12	-0.0933	-0.554	0.263	0.384
LOC_Os03g05260.1	ankyrin repeat domain containing protein, expressed	0.379257	0.152103	0.572557	0.816	0.748	0.865	-0.631	-1.07	-0.4	0.107	0.542	-0.524	-0.125
LOC_Os03g05280.1	ras-related protein, putative, expressed	0.0642753	0.95064	0.734883	0.708	0.848	0.878	1.96	0.0595	0.326	-1.38	0.528	0.588	0.261
LOC_Os03g05320.2	expressed protein	0.212643	0.938238	0.387976	0.785	0.847	0.844	1.22	0.0722	0.822	-0.688	0.455	0.527	-0.295
LOC_Os03g05520.1	nicotiana lesion-inducing like, putative, expressed	0.313901	0.707206	0.067447	0.806	0.832	0.715	-0.548	0.199	-1.07	0.194	-0.553	-0.354	0.713
LOC_Os03g05620.1	inorganic phosphate transporter, putative, expressed	0.744382	0.0621049	0.845251	0.848	0.686	0.885	-0.441	-2.79	-0.264	-0.432	1.92	-0.873	-0.61
LOC_Os03g05710.1	acetyltransferase, GNAT family, putative, expressed	0.399007	0.0627962	0.0359178	0.818	0.687	0.647	-0.842	-2.02	-2.34	-0.457	0.717	-1.3	1.04
LOC_Os03g05720.1	WD domain, G-beta repeat domain containing protein, expressed	0.072343	0.0161647	0.457204	0.717	0.565	0.853	0.443	0.641	-0.169	-0.214	-0.413	0.229	0.398
LOC_Os03g05730.1	cell division control protein 48 homolog E, putative, expressed	0.00406904	0.028785	0.0561659	0.423	0.621	0.696	0.738	0.503	0.424	-0.322	-0.0866	0.416	-0.00802
LOC_Os03g05740.1	ras-related protein, putative, expressed	0.623349	0.00301551	0.136046	0.84	0.366	0.776	-0.0887	-0.697	-0.285	-0.179	0.429	-0.268	0.0175
LOC_Os03g05806.1	pseudouridine synthase family protein, putative, expressed	0.328955	0.0987377	0.637014	0.808	0.72	0.871	0.314	0.559	0.148	-0.0584	-0.304	0.255	0.107
LOC_Os03g05812.4	expressed protein	0.873555	0.474503	0.998674	0.856	0.812	0.893	0.142	0.646	0.00148	0.0556	-0.449	0.197	0.196
LOC_Os03g05980.1	40S ribosomal protein S9-2, putative, expressed	0.00547266	0.000994196	0.00352646	0.461	0.227	0.302	-0.561	-0.737	-0.605	0.0852	0.261	-0.476	0.129
LOC_Os03g06200.1	aminotransferase, putative, expressed	0.0105333	0.0273695	0.0820035	0.539	0.616	0.733	0.378	0.309	0.23	-0.148	-0.0798	0.229	-0.00107
LOC_Os03g06230.1	galactose mutarotase-like, putative, expressed	0.142886	0.0449572	0.796683	0.762	0.66	0.882	0.749	1.08	-0.124	-0.322	-0.657	0.427	0.551
LOC_Os03g06330.1	tyrosine protein kinase domain containing protein, putative, expressed	0.0379146	0.224729	0.856448	0.666	0.771	0.885	-0.769	-0.413	-0.0591	0.459	0.103	-0.31	-0.251
LOC_Os03g06340.1	XS domain containing protein, expressed	0.00776923	0.186989	0.00483312	0.504	0.761	0.353	-0.742	-0.312	-0.808	0.277	-0.153	-0.466	0.342
LOC_Os03g06950.1	ubiquitin carboxyl-terminal hydrolase domain containing protein, expressed	0.61013	0.234741	0.20605	0.839	0.774	0.805	0.585	1.41	1.51	0.291	-0.534	0.875	-0.632
LOC_Os03g07150.2	OsPP2Ac-5 - Phosphatase 2A isoform 5 belonging to family 2, expressed	0.410793	0.529486	0.105314	0.82	0.818	0.755	-0.704	-0.534	1.47	0.762	0.591	0.0575	-1.41
LOC_Os03g07300.1	ribulose-phosphate 3-epimerase, chloroplast precursor, putative, expressed	0.290936	0.940937	0.122899	0.802	0.847	0.768	-0.791	-0.0537	-1.2	0.28	-0.457	-0.511	0.688
LOC_Os03g07370.1	HNH endonuclease domain-containing protein, putative, expressed	0.743808	0.357712	0.178664	0.848	0.797	0.796	-0.111	-0.318	-0.479	-0.116	0.0913	-0.227	0.252
LOC_Os03g07440.1	putativ eribonuclease P, putative, expressed	0.599997	0.868831	0.51112	0.838	0.843	0.859	1.14	-0.357	-1.44	-1.31	0.194	-0.163	1.28
LOC_Os03g07570.3	aminotransferase, putative, expressed	0.938542	0.0839224	0.103411	0.86	0.708	0.753	0.0221	-0.539	-0.503	-0.277	0.284	-0.255	0.248
LOC_Os03g07840.1	adenylosuccinate synthetase, chloroplast precursor, putative, expressed	0.0881525	0.028843	0.0707885	0.731	0.621	0.719	-1.83	-2.49	-1.96	0.262	0.916	-1.57	0.392
LOC_Os03g07910.1	nitrilase, putative, expressed	0.661508	0.114456	0.402399	0.843	0.73	0.846	-0.308	-1.19	0.597	0.0834	0.962	-0.224	-0.821
LOC_Os03g07960.1	expressed protein	0.104546	0.0590424	0.131341	0.742	0.682	0.773	-0.312	-0.373	-0.287	0.069	0.13	-0.243	0.0439
LOC_Os03g08220.1	lipoxygenase protein, putative, expressed	0.306716	0.823085	0.498149	0.805	0.84	0.858	-0.762	-0.162	0.497	0.655	0.0551	-0.107	-0.604
LOC_Os03g08280.3	peptidase, T1 family, putative, expressed	0.542178	0.319241	0.861067	0.833	0.791	0.886	-0.48	-0.799	-0.137	0.126	0.445	-0.354	-0.217
LOC_Os03g08360.1	3-ketoacyl-CoA synthase 10, putative, expressed	0.413717	0.00425864	0.825711	0.82	0.41	0.884	-0.123	-0.542	0.0326	-0.0351	0.384	-0.158	-0.191
LOC_Os03g08440.2	ribosomal protein S2, putative, expressed	0.455038	0.0124246	0.00413078	0.825	0.537	0.327	-0.0671	-0.267	-0.326	-0.0979	0.102	-0.165	0.161
LOC_Os03g08630.1	NAD-dependent epimerase/dehydratase, putative, expressed	0.00341352	0.626994	0.397894	0.4	0.826	0.846	3.29	-0.422	0.745	-2.38	1.32	0.902	0.157
LOC_Os03g08710.2	THION26 - Plant thionin family protein precursor, expressed	0.0054144	0.00222077	0.0428462	0.46	0.327	0.667	1.11	1.28	0.718	-0.329	-0.506	0.777	0.0585
LOC_Os03g08754.2	OsMADS47 - MADS-box family gene with MIKCc type-box, expressed	0.878919	0.257304	0.739291	0.856	0.779	0.878	-0.288	-2.22	0.63	-0.181	1.75	-0.469	-1.1
LOC_Os03g08790.1	aspartic proteinase nepenthesin precursor, putative, expressed	0.223917	0.0262606	0.031751	0.788	0.613	0.632	-0.269	-0.545	-0.522	-0.0651	0.211	-0.334	0.188
LOC_Os03g08810.1	expressed protein	0.00145853	0.000218177	0.00769242	0.288	0.094	0.428	-1.25	-1.64	-0.949	0.291	0.681	-0.961	-0.0116
LOC_Os03g08820.1	expressed protein	0.367984	0.00187728	0.258688	0.814	0.306	0.82	-0.269	1.22	-0.342	0.422	-1.07	0.153	0.495
LOC_Os03g08860.1	GRAM domain containing protein, expressed	0.0348223	0.681161	0.0755658	0.659	0.83	0.726	-2.12	0.363	1.72	2.11	-0.374	-0.0101	-1.73
LOC_Os03g09020.1	dehydrogenase, putative, expressed	0.40801	0.706651	0.629895	0.819	0.832	0.87	-0.73	-0.327	0.419	0.57	0.168	-0.159	-0.579
LOC_Os03g09100.1	calmodulin-binding transcription activator, putative, expressed	0.0442988	0.715388	0.653374	0.679	0.833	0.872	-0.479	0.0773	0.0954	0.402	-0.154	-0.0765	-0.172
LOC_Os03g09210.1	NADH dehydrogenase 1 alpha subcomplex subunit 13, putative, expressed	0.193947	0.0805757	0.0711665	0.78	0.705	0.72	-2.33	-3.27	-3.4	0.0839	1.02	-2.25	1.15
LOC_Os03g09260.1	ubiquitin carboxyl-terminal hydrolase 26, putative, expressed	0.955636	0.549807	0.0862227	0.861	0.82	0.738	-0.0549	-0.596	1.84	0.353	0.894	0.298	-1.55
LOC_Os03g09900.1	membrane protein, putative, expressed	0.0206869	0.689134	0.0790069	0.611	0.831	0.73	0.339	0.0502	-0.24	-0.302	-0.0129	0.0373	0.277
LOC_Os03g10060.1	S10/S20 domain containing ribosomal protein, putative, expressed	0.0259653	0.623086	0.0775443	0.632	0.826	0.728	0.422	-0.081	0.316	-0.258	0.245	0.164	-0.152
LOC_Os03g10070.1	transcription initiation factor IIB, putative, expressed	0.147243	0.00440148	0.000486314	0.764	0.414	0.0871	-0.397	0.94	1.32	0.862	-0.474	0.466	-0.854
LOC_Os03g10180.1	expressed protein	0.0512075	0.000473741	0.0488349	0.691	0.151	0.682	-1.22	2.87	1.23	1.94	-2.15	0.721	-0.512
LOC_Os03g10240.2	DUF677 domain containing protein, putative, expressed	0.503173	0.442656	0.31481	0.83	0.808	0.832	0.462	0.532	0.705	-0.0373	-0.107	0.425	-0.28
LOC_Os03g10340.1	40S ribosomal protein S3a, putative, expressed	0.0171133	0.0157835	0.44624	0.592	0.562	0.852	0.355	0.361	0.0974	-0.152	-0.158	0.203	0.106
LOC_Os03g10370.1	ADP-ribosylation factor, putative, expressed	0.883416	0.17758	0.704216	0.857	0.757	0.876	0.168	-1.63	-0.436	-0.642	1.15	-0.474	-0.0374
LOC_Os03g10400.2	peptidyl-prolyl cis-trans isomerase, putative, expressed	0.123368	0.0493187	0.51965	0.753	0.668	0.86	-0.639	0.853	-0.252	0.63	-0.863	-0.00964	0.243
LOC_Os03g10460.1	expressed protein	0.515915	0.045241	0.0299126	0.831	0.661	0.625	0.511	1.75	1.94	0.54	-0.701	1.05	-0.89
LOC_Os03g10590.1	splicing factor, putative, expressed	0.0220734	0.260979	0.00225375	0.617	0.78	0.237	-1.87	-0.812	-2.84	0.486	-0.567	-1.38	1.46
LOC_Os03g10640.1	calcium-transporting ATPase, plasma membrane-type, putative, expressed	0.544886	0.147173	0.817344	0.833	0.746	0.883	-0.547	-1.38	-0.207	0.0142	0.844	-0.532	-0.326
LOC_Os03g10750.1	CUE domain containing protein, expressed	0.0140685	0.0019221	0.124177	0.571	0.309	0.768	-1.75	-2.49	-0.982	0.448	1.18	-1.31	-0.325
LOC_Os03g10930.2	ribosomal protein L51, putative, expressed	0.562674	0.342821	0.0231698	0.835	0.795	0.592	0.35	-0.583	-1.59	-0.804	0.128	-0.454	1.13
LOC_Os03g10940.1	casein kinase II subunit alpha-2, putative, expressed	0.00171303	0.00146448	0.017817	0.309	0.274	0.556	1.73	1.77	1.14	-0.569	-0.612	1.16	0.0204
LOC_Os03g11050.3	mannose-1-phosphate guanyltransferase, putative, expressed	0.310687	0.310808	0.948635	0.805	0.79	0.89	0.144	0.144	-0.00887	-0.0741	-0.074	0.0696	0.0785
LOC_Os03g11120.1	methionyl-tRNA synthetase, putative, expressed	0.29308	0.014807	0.00179168	0.802	0.556	0.209	-0.157	-0.421	-0.611	-0.14	0.124	-0.297	0.314
LOC_Os03g11240.1	nucleotidyltransferase, putative, expressed	0.0046448	0.209258	0.180112	0.44	0.767	0.796	3.19	1.16	1.25	-1.79	0.239	1.4	0.153
LOC_Os03g11300.1	expressed protein	0.0223494	0.00169213	0.208002	0.618	0.292	0.806	2.08	3.32	1.03	-0.472	-1.71	1.6	0.579
LOC_Os03g11340.1	leucine-rich repeat resistance protein, putative, expressed	0.921386	0.939258	0.673254	0.859	0.847	0.873	-0.0738	0.057	-0.317	-0.00962	-0.14	-0.0834	0.233
LOC_Os03g11410.1	mitochondrial-processing peptidase subunit, mitochondrial precursor, putative, expressed	0.824518	0.000258514	0.765163	0.853	0.105	0.88	0.0203	-0.512	0.0274	-0.136	0.396	-0.116	-0.144
LOC_Os03g11460.1	expressed protein	0.00437781	0.130395	0.0757304	0.433	0.738	0.726	-2.42	-1.07	-1.29	1.22	-0.124	-1.2	0.0954
LOC_Os03g11470.1	DEAD/DEAH box helicase domain containing protein, expressed	0.0736863	0.0399951	0.591278	0.718	0.65	0.867	-2.17	-2.57	-0.599	0.837	1.24	-1.34	-0.737
LOC_Os03g11570.1	proteasome subunit, putative, expressed	0.775945	0.00178698	0.635149	0.85	0.299	0.871	-0.0354	-0.524	0.0592	-0.0896	0.399	-0.125	-0.184
LOC_Os03g12030.1	3-ketoacyl-CoA synthase, putative, expressed	0.264102	0.160825	0.970682	0.797	0.751	0.891	-1.63	-2.09	-0.0517	0.686	1.15	-0.942	-0.89
LOC_Os03g12250.1	atypical receptor-like kinase MARK, putative, expressed	0.0657726	0.14923	0.739206	0.71	0.747	0.878	0.233	-0.176	0.0383	-0.209	0.2	0.0239	-0.0144
LOC_Os03g12290.1	glutamine synthetase, catalytic domain containing protein, expressed	0.736798	0.279496	0.92507	0.848	0.784	0.889	0.189	-0.626	0.0527	-0.285	0.53	-0.0962	-0.149
LOC_Os03g12350.4	two-component response regulator, putative, expressed	0.0941709	0.957716	0.883711	0.735	0.848	0.887	-2.14	0.0625	-0.172	1.58	-0.625	-0.562	-0.39
LOC_Os03g12510.1	non-symbiotic hemoglobin 2, putative, expressed	9.62e-05	0.0251017	0.000512704	0.0514	0.608	0.0908	0.806	0.329	0.643	-0.362	0.116	0.445	-0.198
LOC_Os03g12590.1	coatomer subunit gamma-1, putative, expressed	0.00268051	0.0272884	0.437856	0.369	0.616	0.851	-0.607	-0.391	-0.121	0.327	0.111	-0.28	-0.159
LOC_Os03g13140.1	non-symbiotic hemoglobin 2, putative, expressed	0.00186933	0.0107153	0.00581779	0.321	0.52	0.383	0.659	0.488	0.546	-0.236	-0.0646	0.423	-0.123
LOC_Os03g13200.1	peroxidase precursor, putative, expressed	0.265273	0.421561	0.414959	0.797	0.806	0.848	0.138	0.0979	-0.0994	-0.104	-0.0638	0.0342	0.134
LOC_Os03g13210.1	peroxidase precursor, putative, expressed	0.425594	0.985238	0.0397932	0.821	0.85	0.659	0.787	0.018	-2.26	-1.15	-0.382	-0.364	1.9
LOC_Os03g13220.1	expressed protein	0.76891	0.506556	0.0721878	0.85	0.815	0.721	0.295	0.673	1.98	0.442	0.0634	0.737	-1.24
LOC_Os03g13390.2	oxidoreductase, aldo/keto reductase family protein, putative, expressed	0.526968	0.194361	0.208638	0.832	0.763	0.806	-0.18	-0.384	-0.371	-0.0534	0.15	-0.234	0.137
LOC_Os03g13540.1	Ser/Thr protein phosphatase family protein, putative, expressed	0.740826	0.325633	0.180226	0.848	0.792	0.796	0.101	-0.308	0.43	-0.0453	0.364	0.0558	-0.374
LOC_Os03g13730.1	translocase of chloroplast 34, putative, expressed	0.646568	0.909328	0.0057686	0.842	0.845	0.381	-0.0931	0.023	0.703	0.251	0.135	0.158	-0.545
LOC_Os03g13750.2	erwinia induced protein 2, putative, expressed	0.242504	0.712032	0.289881	0.792	0.833	0.827	-1.27	-0.387	1.14	1.14	0.258	-0.129	-1.27
LOC_Os03g13800.1	ribosomal protein L7Ae, putative, expressed	0.0333975	0.0784751	0.699212	0.655	0.703	0.875	1.13	0.895	-0.18	-0.669	-0.434	0.461	0.641
LOC_Os03g13810.2	expressed protein	0.00528336	0.000982723	0.0365691	0.457	0.226	0.649	3.08	4.03	2.07	-0.784	-1.73	2.3	0.223
LOC_Os03g13970.2	26S proteasome non-ATPase regulatory subunit 4, putative, expressed	0.0132589	0.279015	0.602918	0.565	0.784	0.868	0.293	0.11	0.0516	-0.179	0.00352	0.114	0.0621
LOC_Os03g14250.1	plant protein of unknown function DUF869 domain containing protein, expressed	0.0209015	0.00100782	0.0906453	0.612	0.229	0.742	1.42	2.42	0.965	-0.22	-1.22	1.2	0.236
LOC_Os03g14260.2	guanine nucleotide exchange family protein, putative, expressed	0.146102	0.140933	0.0600664	0.763	0.743	0.703	-0.904	-0.918	1.22	0.754	0.767	-0.15	-1.37
LOC_Os03g14280.1	ATP-dependent Clp protease ATP-binding subunit, putative, expressed	0.975596	0.469711	0.530372	0.862	0.811	0.861	0.0213	-0.511	-0.442	-0.254	0.278	-0.233	0.209
LOC_Os03g14450.1	enolase, putative, expressed	0.659927	0.057047	0.252526	0.843	0.679	0.819	0.194	0.93	0.522	0.217	-0.518	0.412	-0.11
LOC_Os03g14610.1	HVA22, putative, expressed	0.226359	0.0314925	0.707801	0.788	0.629	0.876	0.662	1.29	-0.197	-0.222	-0.854	0.439	0.637
LOC_Os03g14800.4	serine palmitoyltransferase 1, putative, expressed	0.423222	0.00168907	0.00720318	0.821	0.292	0.417	-0.184	-0.961	0.755	0.0863	0.864	-0.0977	-0.852
LOC_Os03g14860.1	G-patch domain containing protein, expressed	0.0338609	0.00207107	0.07817	0.656	0.318	0.729	0.549	0.935	0.437	-0.0689	-0.455	0.48	0.0434
LOC_Os03g14900.1	NB-ARC/LRR disease resistance protein, putative, expressed	0.369298	0.16349	0.590707	0.814	0.752	0.867	0.17	-0.273	0.1	-0.171	0.272	-0.000601	-0.101
LOC_Os03g14980.2	lissencephaly type-1-like homology motif, putative, expressed	0.000139712	0.545946	0.00227259	0.0681	0.819	0.238	-1.4	0.14	0.935	1.32	-0.22	-0.0799	-1.02
LOC_Os03g14990.1	chorismate synthase 2, chloroplast precursor, putative, expressed	0.71169	0.703821	0.822018	0.846	0.832	0.883	-0.299	-0.307	-0.181	0.102	0.11	-0.197	-0.0155
LOC_Os03g15033.1	expressed protein	0.122251	0.036242	0.295263	0.752	0.642	0.828	0.336	-0.484	-0.219	-0.428	0.392	-0.0917	0.127
LOC_Os03g15050.1	phosphoenolpyruvate carboxykinase, putative, expressed	0.66512	0.0661333	0.00085817	0.843	0.691	0.134	-0.0449	-0.209	0.487	0.103	0.267	0.0581	-0.428
LOC_Os03g15120.1	imidazole glycerol phosphate synthase hisHF, chloroplast precursor, putative, expressed	0.626494	0.493593	0.777414	0.84	0.814	0.881	-0.755	-1.07	0.436	0.408	0.722	-0.347	-0.783
LOC_Os03g15590.1	eukaryotic translation initiation factor, putative, expressed	0.00544124	0.0421727	0.141563	0.46	0.655	0.779	-1.32	-0.859	-0.586	0.626	0.169	-0.69	-0.104
LOC_Os03g15700.1	splicing factor 3A subunit 2, putative, expressed	0.048961	0.104308	0.201194	0.687	0.723	0.804	-0.648	-0.515	-0.394	0.259	0.126	-0.389	0.00429
LOC_Os03g15740.1	uncharacterized TPR repeat-containing protein, putative, expressed	0.625913	0.555345	0.0609412	0.84	0.82	0.705	0.0537	0.0652	-0.227	-0.0809	-0.0923	-0.0271	0.2
LOC_Os03g15780.5	anthranilate synthase component I-1, chloroplast precursor, putative, expressed	0.783201	0.0379841	0.798977	0.851	0.646	0.882	-0.284	-2.43	0.263	-0.328	1.81	-0.612	-0.874
LOC_Os03g15880.5	coronatine-insensitive protein, putative, expressed	0.806482	0.41159	0.967239	0.852	0.805	0.891	-0.397	-1.35	0.0665	-0.0242	0.933	-0.421	-0.488
LOC_Os03g15900.2	SH3 domain containing protein, expressed	0.0131392	0.966292	0.0378742	0.564	0.849	0.653	-0.325	0.0046	-0.257	0.181	-0.149	-0.144	0.113
LOC_Os03g15920.3	expressed protein	0.0529074	0.552924	0.0327294	0.693	0.82	0.636	-1.84	-0.511	2.09	1.78	0.444	-0.0675	-2.15
LOC_Os03g15940.1	OsWLIM2 - LIM domain protein, putative actin-binding protein and transcription factor, expressed	0.227511	0.59596	0.378388	0.789	0.824	0.843	-0.91	-0.387	0.651	0.749	0.225	-0.161	-0.813
LOC_Os03g16000.1	src homology-3 domain protein 3, putative, expressed	0.72616	0.000238993	0.300012	0.847	0.1	0.829	0.0835	1.34	0.254	0.336	-0.922	0.42	0.166
LOC_Os03g16050.1	fructose-1,6-bisphosphatase, putative, expressed	0.121134	0.909632	0.315253	0.751	0.845	0.832	0.181	-0.0123	-0.112	-0.167	0.0263	0.014	0.126
LOC_Os03g16110.3	Ser/Thr protein phosphatase family protein, putative, expressed	0.0243513	0.447678	0.00155172	0.626	0.809	0.194	0.747	0.22	1.23	-0.197	0.33	0.55	-0.682
LOC_Os03g16210.2	tropinone reductase, putative, expressed	0.355386	0.167031	0.29807	0.812	0.754	0.829	-1.05	-1.63	-1.19	0.0856	0.657	-0.969	0.226
LOC_Os03g16369.2	retrotransposon protein, putative, unclassified, expressed	0.0200483	0.162097	0.00185545	0.608	0.752	0.213	-0.432	0.234	-0.663	0.216	-0.449	-0.215	0.448
LOC_Os03g16440.1	outer membrane protein, OMP85 family, putative, expressed	0.147494	0.0807336	0.418647	0.764	0.705	0.849	0.16	-0.199	-0.0859	-0.192	0.168	-0.0311	0.0548
LOC_Os03g16690.1	oxysterol-binding protein, putative, expressed	0.00557211	0.118661	0.813017	0.463	0.732	0.883	-3.3	-1.58	0.224	2.14	0.415	-1.17	-1.39
LOC_Os03g16860.1	DnaK family protein, putative, expressed	0.000875985	0.00371778	0.0520045	0.224	0.393	0.688	0.437	0.349	0.202	-0.19	-0.102	0.247	0.0452
LOC_Os03g16950.1	cysteine-rich repeat secretory protein 55 precursor, putative, expressed	0.518746	0.802174	0.270921	0.831	0.839	0.823	0.162	0.0621	0.282	-0.0351	0.0643	0.126	-0.156
LOC_Os03g17020.2	GTPase-activating protein, putative, expressed	0.00196971	0.45932	0.1595	0.328	0.81	0.787	-3.63	0.655	1.3	3.21	-1.07	-0.418	-1.72
LOC_Os03g17070.1	ATP synthase B chain, chloroplast precursor, putative, expressed	0.18075	0.175883	0.245081	0.776	0.757	0.817	0.252	-0.255	-0.216	-0.307	0.2	-0.0548	0.161
LOC_Os03g17100.1	Core histone H2A/H2B/H3/H4 domain containing protein, putative, expressed	0.0228947	0.0425451	0.60071	0.621	0.655	0.868	1.2	1.03	-0.238	-0.699	-0.535	0.498	0.736
LOC_Os03g17310.1	calcium-transporting ATPase, endoplasmic reticulum-type, putative, expressed	0.291032	0.561649	0.841856	0.802	0.821	0.884	-0.309	-0.166	0.0565	0.204	0.0614	-0.104	-0.161
LOC_Os03g17450.1	nucleotide binding protein, putative, expressed	0.599071	0.611213	0.513924	0.838	0.825	0.86	-0.399	-0.386	0.498	0.327	0.314	-0.0718	-0.569
LOC_Os03g17470.1	IN2-1 protein, putative, expressed	0.323243	0.579049	0.307522	0.807	0.822	0.831	-0.629	-0.346	0.651	0.548	0.265	-0.0811	-0.732
LOC_Os03g17480.1	IN2-1 protein, putative, expressed	0.000754177	0.00665172	0.304079	0.206	0.465	0.83	-4.57	-3.23	-1.01	2.37	1.03	-2.2	-1.19
LOC_Os03g17490.2	expressed protein	0.159635	0.0138818	0.846509	0.768	0.549	0.885	0.664	1.32	-0.0864	-0.191	-0.842	0.473	0.56
LOC_Os03g17520.1	CDP-alcohol phosphatidyltransferase, putative, expressed	0.550015	0.47687	0.481515	0.834	0.812	0.856	0.292	0.349	-0.345	-0.218	-0.275	0.074	0.419
LOC_Os03g17580.1	ribosomal protein L10, putative, expressed	0.215284	0.0525893	0.775286	0.786	0.673	0.88	0.395	0.659	-0.0871	-0.153	-0.418	0.242	0.329
LOC_Os03g17610.1	OsTOP6A3 - Topoisomerase 6 subunit A homolog 3, expressed	0.229646	0.0451193	0.000725831	0.789	0.66	0.119	-0.193	-0.347	-0.744	-0.128	0.0261	-0.321	0.423
LOC_Os03g17660.2	expressed protein	0.873597	0.541379	0.791941	0.856	0.819	0.881	-0.0857	0.332	-0.142	0.112	-0.306	0.0261	0.168
LOC_Os03g17690.1	OsAPx1 - Cytosolic Ascorbate Peroxidase encoding gene 1-8, expressed	0.00524392	0.0157254	0.0966594	0.456	0.562	0.748	-0.406	-0.33	-0.207	0.171	0.0944	-0.236	-0.0291
LOC_Os03g17730.1	P-protein, putative, expressed	0.441746	0.250101	0.723931	0.823	0.777	0.877	0.27	0.412	0.122	-0.0688	-0.211	0.201	0.0788
LOC_Os03g17740.1	transporter, putative, expressed	0.626742	0.367024	0.334869	0.84	0.799	0.836	0.979	1.85	-1.98	-0.768	-1.64	0.211	2.19
LOC_Os03g17930.3	alpha-taxilin, putative, expressed	0.347128	0.0289887	0.263276	0.811	0.622	0.821	0.162	0.422	0.194	0.0328	-0.227	0.195	3.79e-05
LOC_Os03g17960.1	expressed protein	0.0419111	0.273052	0.263728	0.674	0.782	0.822	3.83	1.89	1.93	-1.91	0.0223	1.91	-0.0175
LOC_Os03g17980.2	CAMK_KIN1/SNF1/Nim1_like_AMPKh.2 - CAMK includes calcium/calmodulin depedent protein kinases, expressed	0.213163	0.742285	0.0112011	0.785	0.835	0.487	0.85	0.215	2.01	-0.0812	0.554	0.769	-1.24
LOC_Os03g18130.3	asparagine synthetase, putative, expressed	0.0602224	0.0311997	0.667473	0.703	0.628	0.873	-2.16	-2.56	0.447	1.09	1.49	-1.07	-1.51
LOC_Os03g18180.1	ranBP1 domain containing protein, expressed	0.27088	0.587741	0.540379	0.798	0.823	0.862	-0.538	0.258	0.292	0.541	-0.255	0.00299	-0.289
LOC_Os03g18200.1	heat shock protein DnaJ, putative, expressed	0.00550103	0.00818443	0.06941	0.462	0.49	0.717	2.29	2.13	1.31	-0.859	-0.701	1.43	0.127
LOC_Os03g18210.1	basic helix-loop-helix, putative, expressed	0.306581	0.201621	0.221739	0.805	0.765	0.81	-0.746	-0.948	-0.904	0.0968	0.299	-0.649	0.254
LOC_Os03g18220.1	pyruvate decarboxylase isozyme 2, putative, expressed	0.152128	0.0362535	0.00288513	0.766	0.642	0.271	0.283	0.444	0.729	0.081	-0.08	0.364	-0.365
LOC_Os03g18310.1	6PF-2-K/Fru-2,6-P2ASE liver isozyme, putative, expressed	0.84557	0.750156	0.0755618	0.855	0.835	0.726	-0.103	0.169	1.03	0.378	0.105	0.274	-0.757
LOC_Os03g18410.1	DNA-directed RNA polymerase subunit, putative, expressed	0.127757	0.00049643	0.112829	0.755	0.155	0.761	-0.275	-0.861	-0.288	-0.0811	0.505	-0.356	-0.0681
LOC_Os03g18420.1	CHCH domain containing protein, expressed	0.682282	0.207535	0.087892	0.844	0.767	0.739	0.418	-1.34	-1.89	-1.12	0.638	-0.702	1.18
LOC_Os03g18454.2	gamma-interferon-inducible lysosomal thiol reductase precursor, putative, expressed	0.101478	0.0185549	0.06875	0.74	0.579	0.717	0.684	1.07	0.775	-0.051	-0.44	0.633	-0.142
LOC_Os03g18510.1	expressed protein	0.179512	0.00257724	0.770381	0.775	0.346	0.88	-0.215	-0.607	-0.0446	-0.00141	0.39	-0.217	-0.172
LOC_Os03g18580.1	40S ribosomal protein S7, putative, expressed	0.146246	0.380916	0.0106297	0.763	0.8	0.479	1.7	0.986	3.42	-0.173	0.541	1.53	-1.9
LOC_Os03g18590.1	malonyl CoA-acyl carrier protein transacylase, mitochondrial precursor, putative, expressed	0.301841	0.213985	0.457062	0.804	0.769	0.853	-1.09	-1.33	0.774	0.678	0.919	-0.412	-1.19
LOC_Os03g18630.1	receptor-like kinase RHG1, putative, expressed	0.314494	0.123016	0.669515	0.806	0.734	0.873	-0.495	-0.79	-0.205	0.123	0.418	-0.373	-0.167
LOC_Os03g18720.2	RNA recognition motif containing protein, putative, expressed	0.331013	0.0115381	0.0331021	0.809	0.529	0.637	-0.185	-0.568	-0.452	-0.116	0.266	-0.301	0.151
LOC_Os03g18810.1	aminotransferase, classes I and II, domain containing protein, expressed	0.0150052	0.0203236	0.0317329	0.578	0.588	0.632	-1.37	-1.28	-1.16	0.415	0.331	-0.953	0.207
LOC_Os03g19340.1	WD domain, G-beta repeat domain containing protein, expressed	0.31634	0.352563	0.257465	0.806	0.796	0.82	1.32	1.22	1.5	-0.308	-0.208	1.01	-0.492
LOC_Os03g19400.1	expressed protein	0.00981961	0.383117	0.0420933	0.531	0.801	0.665	0.493	0.139	0.359	-0.245	0.109	0.248	-0.111
LOC_Os03g19410.1	OsPOP7 - Putative Prolyl Oligopeptidase homologue, expressed	0.505291	0.0812749	0.721011	0.83	0.706	0.877	-0.71	-2.01	-0.377	-0.0631	1.23	-0.773	-0.396
LOC_Os03g19452.1	SMP-30/Gluconolaconase/LRE domain protein, putative, expressed	0.0588087	0.231536	0.489567	0.701	0.773	0.857	2.03	-1.21	-0.679	-2	1.25	0.0367	0.716
LOC_Os03g19510.1	OsClp4 - Putative Clp protease homologue, expressed	0.0486919	0.212401	0.793764	0.687	0.768	0.882	0.538	-0.317	-0.0637	-0.499	0.357	0.0392	0.103
LOC_Os03g19560.1	tetratricopeptide repeat domain containing protein, expressed	0.0321262	0.373646	0.335664	0.652	0.799	0.836	0.336	0.124	-0.135	-0.255	-0.0432	0.0813	0.216
LOC_Os03g19650.3	PPR2, putative, expressed	0.129027	0.975796	0.860641	0.755	0.849	0.886	0.277	0.00517	-0.0299	-0.214	0.0578	0.063	0.0929
LOC_Os03g19690.1	expressed protein	0.138008	0.000369699	0.570327	0.76	0.131	0.865	-0.284	-0.955	0.103	-0.000169	0.671	-0.284	-0.387
LOC_Os03g19890.1	NADH dehydrogenase 1 alpha subcomplex subunit 5, putative, expressed	0.134493	0.022488	0.105363	0.758	0.598	0.755	-0.576	-0.961	-0.63	0.0341	0.419	-0.542	0.0885
LOC_Os03g19990.1	WD40-like Beta Propeller Repeat family protein, expressed	0.583929	0.42878	0.150952	0.837	0.807	0.783	-1.06	-1.55	-2.93	-0.323	0.163	-1.38	1.54
LOC_Os03g20170.1	ABC transporter, ATP-binding protein, putative, expressed	0.151734	0.876309	0.751376	0.765	0.843	0.879	1.01	0.103	0.211	-0.678	0.227	0.331	0.12
LOC_Os03g20300.3	glucose-6-phosphate 1-dehydrogenase, chloroplast precursor, putative, expressed	0.27502	0.269342	0.00257149	0.799	0.782	0.254	0.536	-0.543	1.89	-0.0647	1.01	0.471	-1.42
LOC_Os03g20420.3	alpha-N-arabinofuranosidase A, putative, expressed	0.693138	0.466236	0.688203	0.845	0.811	0.875	-0.618	1.15	0.629	0.909	-0.863	0.291	-0.338
LOC_Os03g20630.3	histidine triad family protein, putative, expressed	0.000135884	0.367387	0.0950421	0.0667	0.799	0.746	-2.06	-0.313	-0.614	1.32	-0.435	-0.748	-0.134
LOC_Os03g20680.1	late embryogenesis abundant protein 1, putative, expressed	0.0474145	0.628859	0.139071	0.685	0.826	0.777	-1.2	0.262	0.85	1.18	-0.284	-0.022	-0.872
LOC_Os03g20700.1	magnesium-chelatase, putative, expressed	0.107134	0.880247	0.826432	0.744	0.844	0.884	0.235	0.0204	-0.0297	-0.179	0.0361	0.0564	0.0861
LOC_Os03g20750.1	outer mitochondrial membrane porin, putative, expressed	0.224266	0.215988	0.211768	0.788	0.769	0.807	-0.525	-0.536	-0.541	0.125	0.135	-0.401	0.141
[truncated: 2,585 more rows]
