# Supplementary material for: A fungal core effector exploits the OsPUX8B.2–OsCDC48-6 module to suppress plant immunity
Source: Research Square preprint supplement (doi:10.21203/rs.3.rs-3085022/v1), 2023-07-18
Supplement: Supplementary file 2 [file 58b5d2f2cfd9b94c5e31ecc7.xlsx]

## Sheet: Sheet1
Extended Data Table 2. A diverse collection of 187 M. oryzae isolates from 13 distinct host genera obtained from previous publications.
Strain	Host	BioSample	BioProject	Citation
FJ11SH-527-1	Oryza	SAMN06050070	PRJNA354675	Zhong et al., 2018
FJ12JN-084-3	Oryza	SAMN06050072	PRJNA354675	Zhong et al., 2018
FJ13SH05-2	Oryza	SAMN06050073	PRJNA354675	Zhong et al., 2018
FJ2000-69A	Oryza	SAMN06050075	PRJNA354675	Zhong et al., 2018
FJ2003-001A1	Oryza	SAMN06050077	PRJNA354675	Zhong et al., 2018
FJ2005113B	Oryza	SAMN06050078	PRJNA354675	Zhong et al., 2018
FJ2006-60A3	Oryza	SAMN06050079	PRJNA354675	Zhong et al., 2018
FJ43ZB15-68	Oryza	SAMN06050080	PRJNA354675	Zhong et al., 2018
FJ78-JJ	Oryza	SAMN06050082	PRJNA354675	Zhong et al., 2018
FJ81-MH	Oryza	SAMN06050084	PRJNA354675	Zhong et al., 2018
FJSH0703	Oryza	SAMN06050094	PRJNA354675	Zhong et al., 2018
HB-LTH18	Oryza	SAMN06050099	PRJNA354675	Zhong et al., 2018
GD06-53	Oryza	SAMN06050096	PRJNA354675	Zhong et al., 2018
JX-09Z116-1	Oryza	SAMN06050106	PRJNA354675	Zhong et al., 2018
TW-6-43-1	Oryza	SAMN06050128	PRJNA354675	Zhong et al., 2018
TW-12YL-DL3-2	Oryza	SAMN06050123	PRJNA354675	Zhong et al., 2018
2539	Oryza	SAMN11866126	PRJNA544882	Chen et al., 2020
P-0029	Bromus	SAMN05898532	PRJNA320483	Sayers et al., 2022
13FM-16-1	Oryza	SAMN06050060	PRJNA354675	Zhong et al., 2018
13FM-24-1	Oryza	SAMN06050061	PRJNA354675	Zhong et al., 2018
13FM-5-1	Oryza	SAMN06050063	PRJNA354675	Zhong et al., 2018
MZ5-1-6	Eleusine	SAMN10491321	PRJNA507314	Luciano et al., 2019
B71	Triticum	SAMN06076154	PRJNA355407	Peng et al., 2019
B71	Triticum	SAMN04942725	PRJNA320483	Sayers et al., 2022
Lh88405	Lolium	SAMN14167125	PRJNA320483	Sayers et al., 2022
Arcadia2	Setaria	SAMN14167122	PRJNA320483	Sayers et al., 2022
D10/s9	Eleusine	SAMN15040829	PRJNA418767	Sayers et al., 2022
D10/s71	Eleusine	SAMN15040828	PRJNA418767	Sayers et al., 2022
D9/s50	Eleusine	SAMN15040827	PRJNA418767	Sayers et al., 2022
D15/s6	Eleusine	SAMN15040824	PRJNA418767	Sayers et al., 2022
K65/159w	Eleusine	SAMN15040819	PRJNA418767	Sayers et al., 2022
Rep4-buf1#13	Oryza	SAMN20714328	PRJNA753862	Sayers et al., 2022
Rep1-buf1#10	Oryza	SAMN20714325	PRJNA753862	Sayers et al., 2022
ZM1-2	Triticum	SAMN29254577	PRJNA849498	Liu et al., 2022
70-15	Oryza	SAMN02953596	PRJNA13840	Dean et al., 2005
EI9411	Eleusine	SAMN04318447	PRJNA304354	Zhong et al., 2016
EI9604	Eleusine	SAMN04318448	PRJNA304354	Zhong et al., 2016
HO	Lolium	SAMN08009558	PRJNA320483	Sayers et al., 2022
Bm88324	Urochloa	SAMN08009544	PRJNA320483	Sayers et al., 2022
Bd8401	Urochloa	SAMN08009543	PRJNA320483	Sayers et al., 2022
FJ81-ZP	Oryza	SAMN06050086	PRJNA354675	Zhong et al., 2018
FJ86-CT	Oryza	SAMN06050088	PRJNA354675	Zhong et al., 2018
FJ81-SW	Oryza	SAMN06050085	PRJNA354675	Zhong et al., 2018
Sar-AD3-5	Oryza	SAMN06050114	PRJNA354675	Zhong et al., 2018
TW-12YL-TT4-1	Oryza	SAMN06050125	PRJNA354675	Zhong et al., 2018
Cd88215	Cynodon	SAMN14167123	PRJNA320483	Sayers et al., 2022
PL2-1	Lolium	SAMN08009571	PRJNA320483	Sayers et al., 2022
P29	Bromus	SAMN08009567	PRJNA320483	Sayers et al., 2022
P28	Bromus	SAMN08009566	PRJNA320483	Sayers et al., 2022
ML33	Oryza	SAMN08009565	PRJNA320483	Sayers et al., 2022
IE1K	Oryza	SAMN08009563	PRJNA320483	Sayers et al., 2022
IB49	Oryza	SAMN08009561	PRJNA320483	Sayers et al., 2022
Br80	Triticum	SAMN08009546	PRJNA320483	Sayers et al., 2022
FJ99138	Oryza	SAMN06050093	PRJNA354675	Zhong et al., 2018
Nich-2-3-2	Oryza	SAMN06050111	PRJNA354675	Zhong et al., 2018
Nich-2-7-4	Oryza	SAMN06050112	PRJNA354675	Zhong et al., 2018
FPH-2015-44	Triticum	SAMN14144145	PRJNA320483	Sayers et al., 2022
TF05-1	Lolium	SAMN08009576	PRJNA320483	Sayers et al., 2022
SSFL02-1	Stenotaphrum	SAMN08009573	PRJNA320483	Sayers et al., 2022
Pg1213-22	Lolium	SAMN08009569	PRJNA320483	Sayers et al., 2022
P3	Triticum	SAMN08009568	PRJNA320483	Sayers et al., 2022
P3	Triticum	SAMN14167126	PRJNA320483	Sayers et al., 2022
LpKY97	Lolium	SAMN08009564	PRJNA320483	Sayers et al., 2022
IC17	Oryza	SAMN08009562	PRJNA320483	Sayers et al., 2022
IB33	Oryza	SAMN08009560	PRJNA320483	Sayers et al., 2022
IA1	Oryza	SAMN08009559	PRJNA320483	Sayers et al., 2022
GG11	Lolium	SAMN08009555	PRJNA320483	Sayers et al., 2022
G22	Eleusine	SAMN08009554	PRJNA320483	Sayers et al., 2022
G17	Eragrostis	SAMN08009553	PRJNA320483	Sayers et al., 2022
G17	Eragrostis	SAMN14167124	PRJNA320483	Sayers et al., 2022
FR13	Oryza	SAMN08009552	PRJNA320483	Sayers et al., 2022
CHW	Lolium	SAMN08009549	PRJNA320483	Sayers et al., 2022
Br35	Urochloa	SAMN14144141	PRJNA320483	Sayers et al., 2022
Wk3-1	Lolium	SAMN14603776	PRJNA320483	Sayers et al., 2022
Pr8202	Panicum	SAMN14603774	PRJNA320483	Sayers et al., 2022
Br81	Triticum	SAMN14144142	PRJNA320483	Sayers et al., 2022
BdMeh16-1	Triticum	SAMN04942534	PRJNA320483	Sayers et al., 2022
T25	Triticum	SAMN08009575	PRJNA320483	Sayers et al., 2022
SSFL14-3	Stenotaphrum	SAMN08009574	PRJNA320483	Sayers et al., 2022
PH42	Eleusine	SAMN08009570	PRJNA320483	Sayers et al., 2022
Guy11	Oryza	SAMN08009557	PRJNA320483	Sayers et al., 2022
GrF52	Setaria	SAMN08009556	PRJNA320483	Sayers et al., 2022
CHRF	Lolium	SAMN08009548	PRJNA320483	Sayers et al., 2022
Br7	Triticum	SAMN08009545	PRJNA320483	Sayers et al., 2022
B51	Eleusine	SAMN08009542	PRJNA320483	Sayers et al., 2022
B2	Triticum	SAMN08009541	PRJNA320483	Sayers et al., 2022
B2	Triticum	SAMN05580113	PRJNA320483	Sayers et al., 2022
Arcadia	Setaria	SAMN08009540	PRJNA320483	Sayers et al., 2022
10100	Oryza	SAMN08712647	PRJNA438312	Longya et al., 2019
TF15-1	Lolium	SAMN14144147	PRJNA320483	Sayers et al., 2022
Br118	Triticum	SAMN14144140	PRJNA320483	Sayers et al., 2022
Br116	Triticum	SAMN14144139	PRJNA320483	Sayers et al., 2022
BdMAG	Triticum	SAMN14144138	PRJNA320483	Sayers et al., 2022
U168	Luziola	SAMN14603775	PRJNA320483	Sayers et al., 2022
pg1213-2	Lolium	SAMN14603777	PRJNA320483	Sayers et al., 2022
TP2	Lolium	SAMN14151737	PRJNA320483	Sayers et al., 2022
SSTX16-11	Stenotaphrum	SAMN14144144	PRJNA320483	Sayers et al., 2022
Pd88413	Paspalum	SAMN14144143	PRJNA320483	Sayers et al., 2022
76_3	Oryza	SAMEA4751761	PRJEB27387	Gladieux et al., 2018
82_0835	Oryza	SAMEA4751762	PRJEB27387	Gladieux et al., 2018
90_4_1	Oryza	SAMEA4751764	PRJEB27387	Gladieux et al., 2018
Glhn4	Oryza	SAMEA4751768	PRJEB27387	Gladieux et al., 2018
VO113	Oryza	SAMEA4751777	PRJEB27387	Gladieux et al., 2018
VO108	Oryza	SAMEA4751776	PRJEB27387	Gladieux et al., 2018
Py22.1	Triticum	SAMN05725179	PRJNA320483	Sayers et al., 2022
P-0028	Bromus	SAMN05864041	PRJNA320483	Sayers et al., 2022
WBKY11	Triticum	SAMN08009578	PRJNA320483	Sayers et al., 2022
13FM-3-2	Oryza	SAMN06050062	PRJNA354675	Zhong et al., 2018
13FM-9-1	Oryza	SAMN06050064	PRJNA354675	Zhong et al., 2018
BJ08-8	Oryza	SAMN06050067	PRJNA354675	Zhong et al., 2018
HN10-1604	Oryza	SAMN06050102	PRJNA354675	Zhong et al., 2018
JS09-138	Oryza	SAMN06050105	PRJNA354675	Zhong et al., 2018
YN07205e	Oryza	SAMN06050135	PRJNA354675	Zhong et al., 2018
YN072311	Oryza	SAMN06050137	PRJNA354675	Zhong et al., 2018
YN072313	Oryza	SAMN06050138	PRJNA354675	Zhong et al., 2018
YN08181e	Oryza	SAMN06050139	PRJNA354675	Zhong et al., 2018
YN08182c	Oryza	SAMN06050140	PRJNA354675	Zhong et al., 2018
D1/s50	Eleusine	SAMN15040832	PRJNA418767	Sayers et al., 2022
D1/s53b	Eleusine	SAMN15040831	PRJNA418767	Sayers et al., 2022
K17	Eleusine	SAMN15040823	PRJNA418767	Sayers et al., 2022
K13	Eleusine	SAMN15040822	PRJNA418767	Sayers et al., 2022
K7/28w	Eleusine	SAMN15040821	PRJNA418767	Sayers et al., 2022
K28/82w	Eleusine	SAMN15040820	PRJNA418767	Sayers et al., 2022
Y34	Oryza	SAMN02981398	PRJNA82691	Xue et al., 2012
P131	Oryza	SAMN02981399	PRJNA82693	Xue et al., 2012
HN19311	Oryza	SAMN02216973	PRJNA209870	Chen et al., 2013
BdJes16-1	Triticum	SAMN04942531	PRJNA320483	Sayers et al., 2022
BdBar16-1	Triticum	SAMN04940126	PRJNA320483	Sayers et al., 2022
Br130	Triticum	SAMN08009547	PRJNA320483	Sayers et al., 2022
87-120	Oryza	SAMN08377452	PRJNA320483	Sayers et al., 2022
BdKUS	Triticum	SAMN14144137	PRJNA320483	Sayers et al., 2022
Br62	Eleusine	SAMN14151738	PRJNA320483	Sayers et al., 2022
Glhn3	Oryza	SAMEA4751767	PRJEB27387	Gladieux et al., 2018
VO104	Oryza	SAMEA4751775	PRJEB27387	Gladieux et al., 2018
98-06	Oryza	SAMN03010511	PRJNA259589	Dong et al., 2015
GUY11	Oryza	SAMN06050151	PRJNA354811	Bao et al., 2017
HB-14	Oryza	SAMN06050098	PRJNA354675	Zhong et al., 2018
GD08-2025	Oryza	SAMN06050097	PRJNA354675	Zhong et al., 2018
HN-158	Oryza	SAMN06050101	PRJNA354675	Zhong et al., 2018
JS08-611	Oryza	SAMN06050104	PRJNA354675	Zhong et al., 2018
SC-10-120-65-2	Oryza	SAMN06050115	PRJNA354675	Zhong et al., 2018
YN072310	Oryza	SAMN06050136	PRJNA354675	Zhong et al., 2018
YN8773R-27	Oryza	SAMN06050144	PRJNA354675	Zhong et al., 2018
ZJ08-41	Oryza	SAMN06050146	PRJNA354675	Zhong et al., 2018
ZJ2011-7-1	Oryza	SAMN06050147	PRJNA354675	Zhong et al., 2018
JX11-141	Oryza	SAMN06050108	PRJNA354675	Zhong et al., 2018
JX10-102	Oryza	SAMN06050107	PRJNA354675	Zhong et al., 2018
TW-TN4-2	Oryza	SAMN06050133	PRJNA354675	Zhong et al., 2018
YN8773-19	Oryza	SAMN06050143	PRJNA354675	Zhong et al., 2018
YN126311	Oryza	SAMN06050141	PRJNA354675	Zhong et al., 2018
ZJ00-10	Oryza	SAMN06050145	PRJNA354675	Zhong et al., 2018
K5/24W	Eleusine	SAMN15098633	PRJNA418767	Sayers et al., 2022
T6	Eleusine	SAMN15098632	PRJNA418767	Sayers et al., 2022
SV9610	Setaria	SAMN04318449	PRJNA304354	Zhong et al., 2016
SV9623	Setaria	SAMN04318450	PRJNA304354	Zhong et al., 2016
FJ81278	Oryza	SAMN02215332	PRJNA209870	Chen et al., 2013
FJ81278	Oryza	SAMN06050150	PRJNA354811	Bao et al., 2017
DB11-621	Oryza	SAMN06050068	PRJNA354675	Zhong et al., 2018
FJ81-JY	Oryza	SAMN06050083	PRJNA354675	Zhong et al., 2018
FJ86061ZE3-39	Oryza	SAMN06050089	PRJNA354675	Zhong et al., 2018
FJ81221ZB11-14	Oryza	SAMN06050087	PRJNA354675	Zhong et al., 2018
TW-1-1-1-B-1	Oryza	SAMN06050117	PRJNA354675	Zhong et al., 2018
TW-2-7-2-A-1	Oryza	SAMN06050126	PRJNA354675	Zhong et al., 2018
TW-CYBP1-3	Oryza	SAMN06050129	PRJNA354675	Zhong et al., 2018
TW-PT3-1	Oryza	SAMN06050131	PRJNA354675	Zhong et al., 2018
YN126441	Oryza	SAMN06050142	PRJNA354675	Zhong et al., 2018
SC-10-25-44-1	Oryza	SAMN06050116	PRJNA354675	Zhong et al., 2018
TW-12CY-TB1-2	Oryza	SAMN06050118	PRJNA354675	Zhong et al., 2018
TW-12HL-YL2-1	Oryza	SAMN06050120	PRJNA354675	Zhong et al., 2018
TW-6-2-2-B-1	Oryza	SAMN06050127	PRJNA354675	Zhong et al., 2018
TW-PT1-1	Oryza	SAMN06050130	PRJNA354675	Zhong et al., 2018
WD-3-1_1	Oryza	SAMN06050134	PRJNA354675	Zhong et al., 2018
V86010	Oryza	SAMN06392751	PRJNA376429	Sayers et al., 2022
Py5020	Triticum	SAMN05762829	PRJNA320483	Sayers et al., 2022
BJ-90-611	Oryza	SAMN06050066	PRJNA354675	Zhong et al., 2018
FJ0204804	Oryza	SAMN06050069	PRJNA354675	Zhong et al., 2018
FJ11YD-673-1	Oryza	SAMN06050071	PRJNA354675	Zhong et al., 2018
FJ2000-62A	Oryza	SAMN06050074	PRJNA354675	Zhong et al., 2018
FJ2001-112B	Oryza	SAMN06050076	PRJNA354675	Zhong et al., 2018
FJ95054B	Oryza	SAMN06050090	PRJNA354675	Zhong et al., 2018
HN-0812-3	Oryza	SAMN06050100	PRJNA354675	Zhong et al., 2018
JS-10-6-1-2	Oryza	SAMN06050103	PRJNA354675	Zhong et al., 2018
FJ95085AZB13-116	Oryza	SAMN06050091	PRJNA354675	Zhong et al., 2018
GD-05-029b	Oryza	SAMN06050095	PRJNA354675	Zhong et al., 2018
TW-12YL-DP1-1	Oryza	SAMN06050124	PRJNA354675	Zhong et al., 2018
KA1-3-1	Oryza	SAMN06050109	PRJNA354675	Zhong et al., 2018
KA2-1-1	Oryza	SAMN06050110	PRJNA354675	Zhong et al., 2018
TW-12HL-DF1-2	Oryza	SAMN06050119	PRJNA354675	Zhong et al., 2018
TW-12TD-RH1-1	Oryza	SAMN06050121	PRJNA354675	Zhong et al., 2018
TW-12TN-HB2-2	Oryza	SAMN06050122	PRJNA354675	Zhong et al., 2018
TW-PT6-1	Oryza	SAMN06050132	PRJNA354675	Zhong et al., 2018
D14/s30	Eleusine	SAMN15040825	PRJNA418767	Sayers et al., 2022
