# Supplementary material for: A fungal core effector exploits the OsPUX8B.2–OsCDC48-6 module to suppress plant immunity
Source: Research Square preprint supplement (doi:10.21203/rs.3.rs-3085022/v1), 2023-07-18
Supplement: Supplementary file 3 [file a2d02155d1ae851e5a29a32a.xlsx]

## Sheet: Sheet1
Extended Data Table 1. Predicted cNLS-harboring secreted proteins of infecting Magnaporthe oryzae.
Protein ID	Number of monopartie cNLS	Number of bipartie cNLS	Max contribution score	Annotation in EnsemblFungi	Protein seqence
MGG_04516	1	0	9	Glycosyl transferase family 17 protein	MAPIRKLRIWVVVPLAMLLVFLWHRQADVASDATSSSPPSAAHRVSVDMFHQVPGLPDAAMCRMHGWRPYQTPASGRKRKVYDLFMINTELEWLEIRLNTSYHEVDHFIVVEAPLTFTGLPKPLIIKENWERFAPYHDKLIYHELQYPPGYDPPRAWDREDLQRDAMLTQVFPGLEGGVSQPQDGDVIIVADVDEVVRPETLRLLRACAFPRRLTLRSRFYYYSFEFLHRGPEWAHPQATTYAGSVDATIKPTNLRNGDGGLGPLIYFDKDDLWNAGWHCSSCYATMSEVLTKMASFSHVSLNQDFFRDRNRIADRVREGLDLWSRADQIYDRIKDNKDLPPFVLNHKDRFVHLLDRSGKSAGFSDYPP
MGG_00238	0	4	6.7	Ent-kaurene oxidase	MFVVRPGVDLLVQRPWIAVFLAAALLTAVCISRRRKPDDLEHIPCSGQGTPQKKAARVQTPCKKTAANRIGYYVCVPYHLLKSYASASEEVLSPHAPFEEVCFCYQISNAFVEASITQINVTSQALIHSVKRDLTPSIGKATPELSRVARDAVLSEIPQSSDWTEVDVHHQLVRIVTIVSGWMFVGPDFCRTDEYMDLAAHYAADAFGGPLVLQMFPKALRSIVAPLVPPVRRVWKAHRRIAALLGPAIAQRQRNTGPGSQPAPDDMLQWLIDNRHQFPDEIKGDGDIARLQLALSAVAIHTTALTATATLYDLAAEPEIMQDVREEIHRVLQEHDGKITSKMLFDLKLLDAVCKESQRLNPADLLSARRRVMQPFTFSDGTAVPVGTMLAVPVYHIGR…
MGG_15443	0	1	6.1	Putative uncharacterized protein	MHVKQSTLAIAAMLLLPAVNAIPAGGHAPSRSETVDTGDANGCMVTVHQPKRKLSDKQKAKGAEEWGKLMGHKCILFGHSEEVAGRYVTVPKDHCDDIRADFPSGWYTVGTLALC
MGG_03203	1	1	7	54S ribosomal protein L16	MSRKMSSALLAAFQGLRIAPATTLRPSIIPTSLRTLPALPTIRNARPFSSTVPQLSWLEPQLDRRKKKMKGRCRVPTGGSMKGTTVVWGDYGLRMKDHDRRVSAKHLKMAENVIKLRLRGQKYRLYKRVNCNIGVFTSGNEHRMGKGKGSFDHWASRISVSHVIFELRGVLHEQVIRDALRLAATKIPGQCEIIKKGDPGCVGITKIENGLTLEDLKRPWMKARQERLGTLDVTPQSSAVTNAPNSTSPAQ
MGG_00951	2	0	9	Mannan endo-1,6-alpha-mannosidase DCW1	MHNVLLQTVVAVLLASKAVDAAYSIGSDDEIRASARTIAYDLMSYYSGNQSGQVPGILPGPPPKGDYYWWEGGALMGAMIDYWHLTGDATYNDVVSQGMLHQVGDNRDYQPVNYTASLGNDDQAFWGMSAMLAAEVNFPNPPPDQPQWLSLAQAVFNTQAAPARHDKTCGGGMRWQIPIANAGYNYKNSIANGCFFNMGARLARYTGNSSYADWAETQWDWLQSVGFIDADYNIYDGAHIETNCTDINRALFSYTYGVMVLGAANMYNFTNGSAKWEARVKGLLTATFETFFLDDVITEVACEPHDSCTTDMLSFKGYVHRWLTTATTVAPFTRAQVLPILRKSAEAAVATCTGGKDGRQCGFKWSTREFDGKTGAGQQMNVLGAVTSLLQKASQSAPL…
MGG_14830	0	1	6.7	Putative uncharacterized protein	MWPQGISGKIALVYITLSAFLCHAISAATGAGSSFSAATEAKTGPLTLNKRAKILDTCTGQDREQLVLPSKRYNLKHADTYAYFALVARSEARVLMEMGNREAPVQNDHEQNQVAETP
MGG_01466	1	0	8	Putative uncharacterized protein	MKPSTVYPEPITMPSRGGLSKWTAMLSTTLLLTSLAAAQSIPMDYCATINTGTGPGNHSDWQSDGLCSNFCKGSKSGLAIVRGSLCWCSNIMPSDSVQVGTDKCRDPCPGFPDDVCGGDGTWGYMRIRANPITGTTGGSAPASTTTRGSTVTGPVQDSKPPNPAPAPILTTTITALPSLSSTNSAGQQQTTSPPQVETVTADGTTRIVTVAPTGVAGSPQTPSFDSGRKEAGGGLGTGAAVGIAVGVISILVAGGIIGFIFLRRKRRQDREAQDASNPGNYGADMSHPTTGFATRRPTNGTWGSEHSSGRRSSMPDPRMKSATGVYGGTFINRSRESFESMQDNLDYSRPVHHPNKVLRVANPSEND
MGG_04776	1	0	6	Putative uncharacterized protein	MQITKILQLAAFLAIGAPALALQAADEPALQARGVEDSFNSGKLINRPTGAGDPVAADIRAPVGAPAGGAAALTGPTSPRGHGSPRACRARSPRAQHVKRALEARAQGSVGAGFGGAGAAPNGQLPGSPGRGSPKRACRARNRSQSPTRSGLQRTGSLQRTGSGPAAPLAQN
MGG_02391	1	0	8.5	Putative uncharacterized protein	MSDQRGSSRRHGVWTHWVPLVLTVTVATVGIAAWAWSQRSDDDDEVSNRPNNGGSNNNPSSYPQKHQQGDQHLDYENADYGDNPPYGAANRSVDVKADGHSEGVGGWGTRMSGALRRTPSPQQFLDSAGKTVAAGVAAAGAAVGSALAAIREEDKNAYADHETWSEEADAKKKDKGSSSKHGSKKRKTVAIVVSADMHMDDIDEDDFHEHASLLSHIPKTVDFSKIKLFVLIYAPGLKEAGADASGNLPPSLSSSFSNISHNQAQSPKEEKTPLQAATASSPAFNTIYSQALALVEKETMILPFTSSTGHSHILRHLQPDVVYLQESLSGEEGIVVSQMQAWLNKEIILVVGADSGSGGLADSESEVERPSKDVKKWWQREERVGRGRGVIVVDGMRVT…
MGG_07868	2	1	10	Glycosyl hydrolase family 10	MRFTLVIPLLVASAAATLHELALEAGLEYFGAATDAPGQRERAGLNAAYPQYEAVLREEFGQTTPTNGQKWLFVEPYPGVFNFTEGEIISAVAANNSQILRCHALVWHSQLAPWVEAKTDWTPDSLRAAIVRHVSTVAAHWRGRCTHWDVVNEALNEDGTYRESVFYRVLGEEYIKLAFVEAAKADPEAKLYYNDYNLESVGPKSEGARRIVRMLKDEGIKIDGVGMQAHLIAHNAPSLDQQIAVIESYAEEGVEVAITELDVRLQLPANATNLEQQKQVYKNAVGACVQVKACVGITIWDLYDPFSWVPYVFPGEGAALLWFEDFSKHPAYDGVVEALTNGTKCEKSKRKRSRIERSAKLY
MGG_13261	1	0	6	Putative uncharacterized protein	MRTTNGLVLILAGLAAALPQPGGNGVTARAKEAVNGKKFEIRSERLRPVPIKKRANQLIPVVVGGPQVTFVPNMVLAAVGDVVQFQFSNGNHTVTQSAEGQACTPLQMTDPNAVHSGHIPFKDGQQMVGTFNMVVTKTDPMFLYCATGPHCQLGQIMVINPSNTQQLVNYNKISALATKNVDGLKVNGGSVGQIPLGLAAFVPAPPEDGGKGKGDAGKGKGGKATGGKGKGDGAAAPPAAAPPAATPAAPPAATPPAAAPAAPPAAAAPAAPPAEGAANPAPAPAPAPAPEAAPAPAPAPAPK
MGG_00333	1	0	8.5	Putative uncharacterized protein	MSDKDIAREGIVAHENTSGKPRKRGCIGHCGRFWWVYLIALIVIIVIVVPVVILVAVPKIAQDKINAAELDVRDIKALDTQTQNFTMTIDSGIRTDGKVHAKVAPFEGVMYLEDWAPQRPFAKIQFPETSSAASQDVSVKQFVNIEDMEAFTVFNTWLLLNNTLRVTIKGDTSVRVDGIARDYPVVFKKTTTMPGLNLFKGTSVSDPKIITGNHTEDNGANFQGTVTIPNQSHVTFEVGNATFFNYLGDQDVGEVYINNMTIRPGDNVFPMTAKVSNEAVVAAMTKRPACETGKLTFGLRGKKVVNHGQPLPYFADSLASANQTVEIDISQALGFKIPCSQTS
MGG_07716	1	1	6	DnaJ domain-containing protein	MKFSALSLGLLALLSPLTVAWSAEDREIFRVRDELIAGEGKDVNFYDYVGVAPSASVDEIGKAYRKKSRLLHPDKVKQQLTAERTRQAKEDKSKKPKPPTQAEVRAAVKKASDRQARLSIVANILKSPSRDRYDHFLSNGFPTWKGTNYYYNRYRPGLGTAMFGVFLFGGGLAHYLALYMSWKRQRDFVGRYIKFARQTAWGDNLNIPGVETRARTPPPPVAADDDEGAGPAMAMNRKQRRMQERETRREASKGAVSRTARRARGSAAPSGSATPTPQGSGPTGAKKRVVAENGKVLVVDSLGDVYLEEENEEGQVVEYLLDPNEIPQPTIRDTALVRLPIWAYSRTIGRVLGGKNSEDDAAYDEDAETTPLMDDNEDSASEPGKRTPSTDSAEDFELV…
MGG_04825	0	2	6.6	Endopolyphosphatase	MRRPGILFVLGLLCDAVIASIGPDSGLEVQHVLKDPHGYALEAPPHRPLHGRFLHITDFHPDTFYKLHTSTDEDIACHRGEGNAGYYGAEMSDCDTPVSLVNATFDWLDKYWKDKIDFIVWTGDSARHDSDEEIPRNAKQVLGTNRMIANKFTDLLYNESTRALSIPVVPTFGNNDILPHNIMLPGPNRWLQDYSNIWTNFIPEEQRHSFELGGYFYVEVIPNKLAVFSLNTLYFFDRNAAVDDCINPSEPGYKQLEWLRVQLHFMRQRGMKAIMIGHVPPARTDSKMLWDESCWQKYTLWMQQYRDVVTAGIYGHMNIDHFMLQDSQEVDLHLLDNGILDGGLRENLDDELTVMGATDYLKEMRDRWSKLPRSAGQIAGEPSTLALKKKKKHENLGGP…
MGG_09763	0	4	6.9	Putative uncharacterized protein	MKTTFTALLALVAVAQGAKQAKQEDGKGSQGAQIVGVSNNAAAKNGTASSGNGKQAQAGPSADACAAGAILAMGINTNIADQQMELQAVGNVQKALQANDANAFAQAKATLLQFVQNGIAIRQANQQIAPAGNPAIAGLDVVANAQLTELGLANNLTGNAATDNAILQELTKDFTGGIEQNKKNAAAATQGCPGGAGAGAGAANGAAKAGDAKAGADKGKDAKAGADKNKGAADDKNKGAADDKNKGAADDKNKGAADDKNKGAAKAGDAAKAGDAAKAGGAAKAGDAAKAGDAAKGQAKIVQKSVNTEEDDEEEEEESAPPVRRRRFVQW
MGG_06434	2	4	10.5	Putative uncharacterized protein	MKWMRTDFRQERKWKRSAARVLAFACADWVAADDVKRKLLQVPAIIPKPAAARTVPGDDSGQMEDVDMPDQQENEVSATKQKTVSGLDTDMDNENSDEPGEVYIPAMDDEEQIPVTHVVPAQIFALPDTSLTFSFSNSSAFTKILDELPMYGGPLQIPDNADLLKSDQDPDAHWKLAAVPLTKYVERPMVPVLKGPPTKRSRYQFAEESDSDAEDEDNIVYRNNRGDTAGPLKGQAVERELKHVALFDPEMQVLRDRLHAGHQFRPPTEHPMPLQSFYESRTASQWTYAEDDQLKRLQDGYAISVFVWGGTKDAVGMLRTLGTPGRPAE
MGG_07646	1	1	6.5	Alpha-glucuronidase	MMLYSLVLLGLAAIVRAEDGSAAWLRYAPLDDAAAARFKAPDAIVALNSTQTSPVFTAGQELQKGFNGMLGKNVNLVSSPEDLDPEDKDSRIIVVGTAAQFTDETTLGNLTFSPGDLEEDGFYMSTRGRVVQIVGQNERGALYGAFAYLARIAKHEFCGKDGIDNPHQPIRWVNQWDNLDDTGTHGSVERGYAGPSIFFANGGVVADMTRAAEYARLLASIRINAVVVNNVNSNPQILSPGNIDGLGRIADAFRPYGVQLGLSLNFASPQTYGGLDTFDPLDERVIKWWEDKTDELYARIPDMAGYLIKANSEGQPGPHSYNRTLAEGANLFAKATKHHGGLVMFRAFVYDHLADWTNPKLDRAKAAVDYFEGLDEEWDDNVIVQIKYGPIDFQVREPP…
MGG_02859	1	0	6	Initiation-specific alpha-1,6-mannosyltransferase	MLTFKRALIAAAFFLTVLYLTTRPAATSPPTTLAKGAQDGTTEKVAANSAKIISNTASSASTSSQDGKSNSRLAPEGQKPIMDPNMSLYDKLGYQYPYDVETKFPAYIWQTWKWTPADGEFAFREQEATWTEQHPGFIHEVITDTVAVHLLRLLYASVPEVLEAYDALPMPVLKADFFRYLILLARGGIYTDIDTYAIRSALEWIPDSVPRETLGLVVGIEADPDRPDWKEWYSRRIQFCQWTIQAKPGHPVLRQIVTRVTQETLKRKRAGQLEKMADKGVVEFTGPAVWTDIIFEYMNDERYFDMSNSKGVIDWRNFTGMEMPKRVGDVIVLPITSFSPGVQQMGAKDYDDPMAFVKHDFEGTWKPENLRHIGEQKEEGQK
MGG_04847	1	1	7	Peptidase M14	MRFASAWFALCLAQLAKSCLLPEESEHDAAPSLKRRQGGNTGLAIGEGDRFEGGKIVPRGLGTQPVGTDPGKLLSVVEIRSAFDALANEYGFDTFEAPDKTFENRTIFGGAVGGSGKNCTATDGYRAFFNGAIHARERGSSDNVIYFIADLLYANKHNQGIAYGGRTWTNCDVKRALKAGIVFVPLSNPDGVAHDQATHSCWRKNRNPASATPGNAASYGIDLNRNFDFLWDFLKKFDPSVGPNVASSNPASQTFHGTAPFSEPETRAVKWVLDTFKKIRWYIDLHSYTGIVLHSWGSDENQNRRPYMNFMNDTYDSVRGLMPDKPEEGRVYGEYISSDDWRDAAYAGVRAGTAMTGATGRIYDVSASAYLYPTSGASDDYAFSRHFSDPSLNKVFSYT…
MGG_04345	1	0	7	Cytochrome P450 17A1	MAVTSLSTLALFVPILVIGSLAWRIIHSLYFHPLSKFHGPWYAASFSIVHALASTLKVEHEWLLQLTKRYGASKPIRIAPNLLLFPQPSAVKEIYWDSKLNTKGLFYGSGALGPPHLFTTLDGDQHKELRKAIGGPHYTIGTLKNHWEPRFDDLILTALEKWTEKSERGETIQLCDKVAEFAADVMTMVSFSEPWGFVRNDRDERELLKRWRDSLPYFGFVNRFRWFRDVVMKSSWGVYFLPSSSDNTGMGFFMREADRQVTIREYRMKNQQYSQECPDFLQHCLEARIGTKPLSPVQKRAHITLLFQAGADTTGTALGCTFRFLVTNPDVMSRCQAEIDAADQAGKLSSPVVQYEETRTHLPLVVACIRESLRLHPPAPTLFPRIVPRAGGGGLGAKK…
MGG_05685	1	0	7.5	Putative uncharacterized protein	MHFRSSLAWSMVASATQVQAQYLLNDMSFGVGSKISENGHTIPNFSTQGNPRLPELLSNKLILTPPAPGNQRGAVWTDKELHQDEWVTDVSFRVNGPERGGGNMNIWMVRDGSREVGTSSIYTVGHFEGLALVVDTYGGSGGMIRGFLNDGSTDYRSAHVDGLAFAHCNYAYRNLGRPSEIKVTQTQHNFRVDVDSSLCFESTTVGIPGGYKVGVTAASADNPDSVELFKVAVLSHQVGKTQDHHDDHHDAGHDNSHAHDDHGAEHDNEKAHTPSKFSRGHSEPEHGSSHAEHWDEDIPDESASKYTSSKAQFEDLHNRLQSVSHHLSTIFKQVTAQHSMDEHRHEETSSMINDVKTALGKLHDIDSRMHSLEQEVRSIRADLSHKVQTSENNIRTFVG…
MGG_08052	1	0	6	Putative uncharacterized protein	MNKPMQILRMTLRFLSVPLRLRRFHVPAILTLIVLVVVLSANSSFRHVGITPPAWLSGSLHGFPWGKKHPANPPPTLPELKILDLANSRDTDNSTVAQGEPAFCTQRFGPAYLQNLRDNAIEYCKAASGERSKSFRLTCFHSHTRSNGEPDSLCIAQGAIFDVEKEKSIFDCSIRPPTSEEIRRGLVPFNQIPAYWYETGPKEIVDRYVDFQNKPSENLGDNANSAKGQRPLPINILIKREGSAHPWHTLMEIWSLANTIDVLRLSADPEAGGAFFTVPNDAKRTQTIILDNNEDGPFYDLWALFTGRKPVRLSAALEALKKGDLAVDTTLALSPSQLYEVVIPLAGAANPLWQNDWDDRDCKDAPLLKVFVRRVLHHLGLERFEPPTMPLSPSPNKKI…
MGG_02420	1	0	6	Putative uncharacterized protein	MVRLSGLAALVAMGCSSVVTAMEWNTFDGPGFPSCYNVTEVKDPKTVEEAAAMVKEAAAAGKLVRAAGKGHMWYDTQCSDDETVIIRTEGLGRIYDLDLAGGSVMIEGGVTFFTLAQYLHDRGASVNYALVNWNISLGGSIAMGAHRSSLREDAMVGAAAQELHIIDGNGDIRIVKRDANDDDWLAASTSLGLLGIIARIKMSVYPDTKLYAMQKTLEEKDVFEGDIEALIAPYATANLWWWPHKRKFHQRYYDVVDINSTTQQAFQNTFSVTKLEAEAIKAIFNSGKIAFTSNMIGEEILFSQWEKPNFREKTTQEPLTEWPVYGWNYDVLIGGLYPDQTPQWENGLRGYTLELAFPMTQANAVLKRIRALFDEEIWKVKPVTSTYRSGINIKFGKAY…
MGG_07209	3	0	7	Signal sequence receptor alpha chain	MVSLKLTGLAMLAFQLMGAFAQAEGTAEPQTPAEPQLKLDVATTFPDADIFGVKLVNGRPTKAVVDLTNNEADPVRLALVTGALTNPDGLAEGAPVSDAIIRNLTAVKYDVEIPAGEKRSVTYSFALDMQPRDVVVELLAIVINAKGQTFQVPAHADKASVVEPPTSFFDPQIIFLYLVLSAAFAGTLYFVYKTWIEALFPQAKRPRAQQPKKVVKVEAAEPLSGNESAGAASGADFDAKWIPDHHINRPVAKRVKSSASAKAKKGE
MGG_08487	1	0	7	Cellobiose dehydrogenase	MRTTLLSSLACAIAAVTAAGNSSCAGKQTYDHIVVGGGQAGIVAATRLAQTGKHVLLLERGVGPTVATGADNVLSWNDTLTPTDVPGLAPAVRDVGLFSKYMCPDTEGVSACVLGGAGSFNYLVYVHPPARDFDDRWPSGWKWSDVKPAADRVYAVNPGSQIPSADGRRYDFGLYDTLGSGFLASRGWKAVDQVAQPDEKHEAYSYPNWNIGDQKRAGSLASYLPVARQQSGFSMQLNASVSRLLREGGKVTGVEIEGGKKRFRLAEGGKVILAAGAWGTPRVLLNSGIGPAEQLRIIQNGTSGVKLPARDQWVDLPVGKTIRDHSIFTLTIQTNETFGAFNASAAAFGVSSARSDISLYNERSSGQLAQGMHKLIFWTSTDAGGDNRTRYIQGSCSPG…
MGG_07854	0	2	6	Putative uncharacterized protein	MHISKASQLMALLVIGAPVLAFTPKGDNPMVAQSPDPGAQADVAGSPKVSSPAQENWKLVNGRVVMKHPAARPDLGTEDKPNRLVARRTRYDSDNDDDDDDGPIPGSPPHNRRPKGGVARGGPSQKKPNRLVARRTRYDSDNDDDDDDGPIPGSPPHNRKPKGGFARGRASQRNANRLVARGGDDNDDDAVPPSSPKSTRRPGDKPRYLKGYATGNHANHGSPKGQHQ
MGG_05887	1	0	6	Putative uncharacterized protein	MKFLFFIAIAAGLASSTVINPVHQGSDLESRDEIQNDAITAWAAPGSAVHGRQALVHGERHASSLVFKRQPGLFSKKWRPEYYLQDDEGSAAPKSRPAKLSPYPPKPPAGVDTKRLQVWVRINTNMYQEKDLNKVPGFAHAGLRQLTKDIGGKHTDLVIGRGSNWYMFGLAYKDSSWRHRENGDGTMTQVEAEPMDTRAMPTRSRGFYCPLDSEGKESGMIASSMFILEATESSLSGTTWTWLRVNI
MGG_07919	0	1	6.4	Putative uncharacterized protein	MQLYNALVFGLLLPFAIASPARGTSKPKNGQQEISYNLPADPKDGGSCPVNSRDAVDGWCYFDVSMIAFHFGQPESVQGNSGHGGIARAPIHRRENTAVGIMCCVPNRQLEPFVKQYKAQYKREYPTWNGQTVLKVGFFKNSAGTREPSRGFREKCRGGFGAFVKGCMEDLSTARPGSGLSGAWF
MGG_14465	0	2	6.4	Putative uncharacterized protein	MHLSTTSLSLVLVSGVAASLPGFQPSVGGYSGGLASRASITVTEGGKDGGKVVQEEKFSRADISVGGSRVAEAEDNKAVKEGEEKFKGNLGITIDPKTGASNSGGSLGITKGSDGSLSVGGKSGINVGAPAEKQSKKNAEGAAAEGGAATPGREAAAPAEAEKIAAEPAQEGGKEAAAPAAGAGAEAGAGAAAPAAGAGKEGAKKSGKEAAAPAAGAGAEAGGGKEGAKKGGKEAAAPASGAGAEAGGAKEGAKKSGKEAAAPAAGAGAGAEAGAGAADPAKGDGKGKGGGGLQSLKDLITLLTGGGKKNNAAGEGAAADGKKKAGEGAAAGGGAAAEGKKAGEGAAAGDKKKGGEGAAAGGAAAGDKKAGEGAAAGDKKAGEGAAAGDKKKGGEGAAA…
MGG_00992	0	3	6.4	Putative uncharacterized protein	MPSITRTLAFSALLAFANAQGVVLKAVGDKGESAPLQVDLKNPADNNFIADAEIRENIVNACGRTSAGNIDIGETSEINLSKNAVTSVKKGSNLVLTIKQGGANGAGPFDCDLDLTNNSNGLTGQTKLKTKEAKKGDNIEVTATMPNDLKCIGGSTGNLCMVRCRNKQNFGGCVAIQQSDTTPNVNSPQNIKTAATLKSVLDQVNEDQRDFKTTVNAIATASEKDQGAAVAKALVDANLASGVLKDQNTTRVAAPAAGAKNNNNNKNNNKNKNNGKKNNANARTGKKNNAKANAKGGRKANAAGAQGAKKKANAAGAQGAKKNASGGRAAKKNNKRELFREIKRSDAEDVEEVQVNAQSAAGEDFFDDEE
MGG_03353	0	1	6.8	Putative uncharacterized protein	MVSMIKQSGGASLVLLLLALFATLASATPVPAPQQPQFDQQQSLGPTQELEVAAEPKPPIQAPSPGNGDATVDQDTGQVTITKPPGDNGTVSIPIRAMIYHGVPGPKDCRGGPMGVVEIPGPGKALAGQGERCYDLAETANCGVFMSNKADGCEARLFSDLGCRNEDFVNIVVFMPEYRSIGGVWKSMGIRCGVPEPDPATLGEPPLAQYMKKIPKKPKGGKGPGVIPVQPTT
MGG_03029	0	1	6.4	Metalloproteinase	MQFLHLSTAVLACLSSAVVAHGNHHPVRDVADSTLEVTLEAASPSDATNIKATIKNVGSQEARLLKVGTVLDERPVKKLTVLDSNGSEVPFLGIELSLLTEALEPRHYEPLAPGSSISRQLDATFVHDFEPGTYSLVLEGVLPTESGSPIAYRSNTITLNLATGSVATMRKMAEKRTTVMEPCSNRTVVDETVSNCGKLARASAADAADVHSQRFVEYFKTNATAAREQVVRRLEAVARECEATPGGNTSLNCQDIPSWNYCVSDGPLVAYTIWVNGYIVLCPLFYERPALPQECHRQDHATTLIHEMTHARAVAEPFTATSDRAYGYDAVMKLDSANSLDNADTYSLYTNAVHLNC
MGG_10276	0	1	6.4	Putative uncharacterized protein	MQLSNFLSIWALVAMGATAAPMPSGSAPGNPFADGEAYGARPSQGLTPVPKVHDGSYHSCETCAAPFRTEERLAAHRQADHGNQGAAARGSGRHTSKNRGSSKTSERERLDRLASRVGEDYVEKRSQEATEEQEQGHVKPGRSKKEIAQRIRNLPVTPWNQYGAAVKLDKPTRKEQYRQLPGNDRLTPFEEQGDPVQL
MGG_08546	0	1	6.8	Putative uncharacterized protein	MVSFTHVLALAAASFAAAGPISQESQSLERRAQDWTCPSFTHVNADYNPLGCCVYGNNAVECCNLPGKLFNGQPYNAQSLSCDSEWFSSLGKWTLLWDCAQGFKSGAACVGVPKMPKVTITWPVEPQSGN
MGG_10494	0	1	6.8	Chitobiosyldiphosphodolichol beta-mannosyltransferase	MWTFLILCAILFCGALLILLPSRYLHSSSKIGSKTDVSVQVLVLGDIGRSPRVQYHAMSIAKHGGRVDLIGYQETPLHPELLKYPKVSVRSLDPPPRVLRSKSIPFIISGPLKVIWQVFTLIHVLGYETPPAQWLLIQNPPSIPTMAVATVISRCRNTRLLIDWHNYGWTILSGTRGARHPFVRISKLYECLFGRFGSANLTVTHAMARQLKRAPYGIKSPIVPMHDRPAAIFKPLNDPMAKLDILSRILESRDLAAAIVDRRTRLIVSSTSWTPDEDFNLLLSALVQYANSMQDDSQIIVPVVAVITGKGPQKAMYEAKIKKMAEDGLVPNVTIRTAFLSFEDYAALLASADLGVCLHMSSSGVDLPMKVVDMFGAGLPVVAYSAYESFSELVREGEN…
MGG_07869	0	1	6.2	Putative uncharacterized protein	MHSSNILQIIAIFALSASVLSAPTPGRTGGLTKPTRPYEPGEEKADKFDRFASPEFQEPRKLKKCYYYAKLYCLDPVRKHLSKSKEPKSPKHSQSYRDWIDYNGKRHRDAHKEYYEEKDQQARAAKEAI
MGG_11335	0	2	6.7	Putative uncharacterized protein	MVSLYTLMAVGALSLIGPVRATTVSLPSCPSPFTPYVYSGCYTSVSNPDTLPFRAEVPRANMTVEKCQAACKGNGYRFAGLEYYGECRCGSFIGGSKVDESDCKLACTGDKSQVCGGNSRISIYEDPTFPVAASVTTDDYKNIGCHVASLNPGKALVYRVEDVTGQPWSRDTGSNPKCIAGCMSRGFPYAGTEYGGECWCGVVMGSGAVAAPPSECDMKCRGAPDQNCGGPSRINIFVAKGLESTEPCEQQPPTLPETSMTLSSTTLSSTTLSSTTESTTVPTETSTRVVPTTDPATSPTQPSTTQPPTTLPPQTTTSTTSSAVCVSTIVTPPKCEYKCGNWCSGELPDWDDQEGCKHGYSYCKLQIAACFKNAGFPGALKCFEFALWCGACGDYCNKA…
MGG_08455	0	1	6	Putative uncharacterized protein	MHVDIPSVLAGFACLATAVSGSALPPASSAEKLLTSLQKQAVAALKERGAGANGCTVENAAVRRDWAKLSKKERKEYIRAVQCLRSAPAKGDPSFAPGAKTRFDDFVAVHINNTLSIHGTGNFLTWHRYVTWAYENALREECGYKGTQPYWNWFHRADDMTKSPVFDGSDTSLGGNGEFKAHNGTLGGAGAIFIPPGVGGGCVTKGPFVDFPANIGPVRPGMDGMVPSPTGPLGPNPRCLTRDLSNVVSRTYFTHANLHNLTLGAASGSIELMQNEFQGRFADGFLGMHGAGHFGVGGDASDLFSSITDPSFYMHHSMVDFVYWIWQALHPDLAGDIAGSITVNNSPPSREARKDDLLPMGVTTQDRPIGDLLDTLGGTPGCYIFE
MGG_07502	0	1	7.5	Chaperone dnaJ 2	MLLSRAAWLLFSLVQLVFAAEDYYKILEIDRNADEKAIKIAYRRLSKKWHPDKNPGDATAEGKFVEVSEAYEALIDKTTRRIYDQHGHEGLKQHQQGGGGGGHHHDPFDLFSRFFGGSGHFNSGQRRGHNVEVKLSVSLRDFYNGRATEFQWERQHICEECDGSGSADGVVDQCSACNGHGVRVQRHQIAPGMYQQVQMQCDACGGRGKSIKHKCKACGGARVVRKPTTVQINIQRGAPRDSQVIFENEADASPDYVAGDLVVTLTEKAPSLEEDNPDHVDGVFFRRKGDDLFWKEVISLREAWMGDWKRNITHLDGHVVEIGRKRGEVIQPGHVEMVKGEGMPKWHEDIDSVYHTVEFGNLFVEYIVILPDQMDSGMEKEFWSVWEKYRQKIGVDLHK…
MGG_14726	0	1	6.8	Alpha-L-arabinofuranosidase	MLGNIKTNLAYASTVLLASSALVSAQCTIPRSGLRWKDNGGPLAQPANGWASLKDFTVVPYQGKYLVYGTKYQSPNYGSMNFALVSNLRDLSSARQTDMNSGTVAPTLFYFAPKSIWILAYQWGATPFSYRTSTDPTNANGWSQAYPLFSGSISGSSTGPIDQTLIADSTTMYLFFCGDNGKIYRSTMPLGNFPGNFGTASTVIMSDTQANLFEAVQVYSVKGTGTYLMIVEAMGSNGRFFRSFTATSLGGSWTPAAATQSDPFAGKANSGATWTNDISHGDLVRSNADQRFEIDPCNLQLLYQGRSPNAGGDYNALPYRPGLLTLQNPGGSPGTGNPPPTTTPPPATTPPPSGGCAPLYGQCGGQDWTGAKCCSQGTCKVSNQSSAKSRDSRPLPAHS…
MGG_09614	0	3	6.9	Putative uncharacterized protein	MRFTLSLILSAALASTAAAMPQAATKEVRSEPKLIDLAPFKASGTGYKPKKILTEDEARALTAKNLEAAKAPKSAIERRNCKRNEEEYHKMKAKSTCKNPEVRVEWRNFPHEYRLKWVKAARCLYDLPPRMGYPGSKNLAEDFAYIHQQLMENIHAVGHFNVWHRLFLWHYQETLRDQCGYPRDLPLPWWDETKDSGNFANSPIFTPEYYGSAPKVVVKDGKEFATCIEDGAFANITVSIGPAKSVTTPHCLSRALNETKTALTGKAYCDLGNSYSDFWKMAVTQEEGMHANGHEGVGSVMGDMWASPADAIFYMHHTFTDRYFTAWQNADPVRRTYAIGGPNATVGPVSPSTNDSPIRFLGLFPDTTIREIQDAQGGSPFCYKYDY
MGG_01607	0	3	8	Calnexin	MQYRFIAAALSTASLFVGTYAAEDAQKVIKDDATAASSAAPSSTSSAAPELSTFKPTKLKAPFLEQFTEDWETRWKPSHAKKNMKGSGKDEEEWAFVGEWAVEEPTVYKGMEGDKGLVVKNPAAHHAISAKFPKKIDAKGKPLVVQYEVKLQKGLECGGAYMKLLRDNKALHQDEFSNTTPYVIMFGPDKCGHTNKVHFIFNHKNPKTGEYEEKHLNSPPTARIVKTTELYTLIVHPNNTFIIQQNGEQVKQGSLLEDFTPAVNPPAEIDDAKDKKPEDWVDEARIADPEAKKPEDWDEEAPYEIVDEEATKPEDWLEEEPLSIPDPESKKPEDWDDEEDGDWIAPTVPNPKCGEVSGCGPWTKPMIKNPAYKGKWTAPLIDNPAYKGEWAPRKIKNPD…
MGG_08799	0	2	6.2	Putative uncharacterized protein	MKLSVFFTALLASSTVALSVPLFQRSTPPPTVQPATSRPEVDPNFGRPTDPFGKPTHEKRDTNDDDDDDEPVARKRSSAMFPGSRRARKRDAGLISGLPFGPIGSDKVDDAPAASK
MGG_00083	0	6	6.5	Putative uncharacterized protein	MRFETLIVSLLASAAVAVPMNGDGASAALQARSEAPGNGPMPAHFAKRDPKSPGEVKEDLKKKIEADKEKARKKLEEAKKRLPKIPHLNITKPGMPPRQQVKRAAAKDMFSDPQVPVAVKKKGEDAKKKAEDAKKKAEDAKKKSPPKVGVPVGKNNTKPGKPPKKSEPKKATPKRSVTLEERDPLNLGDIGKDIKKELEKLRHKFGKPKNGTAPAAPAEPAANQKRDVEAEAKKDCDKKKDGKKPRKDRKGGKKNNGPKRPGKNSTMPMPKPKPATPKGKRSLPVRLPAMF
MGG_14269	0	1	6.5	Putative uncharacterized protein	MRYSTVYSLAGLLALVWAEEEFELETAVTVFETYIPEPTMYINGGHTYTVTVPCTVTVTKTVTVTKKKPTKTKPPHPPPSSSSTVKTYTPTTLTSVTKPPKPTKSHPPPPPPETTPCETESSTTHKPTKTKPPHSTSTIVPPPPPPPETTPCTTSSSHKPPPPPPETTPCTTSTVVPPPPPPPETTPCTTSSSHKPPPPPPETTPCTTSTSHPPPPPPPETTPCTTSTIVPPPPPPPPETTPCTTSSSHPPPPPPPSHTPKPPPSHSPKPPPPPPSHTPPPPPPPSHTPKPPPPPSHTPSPPPPPPPSHTPAPPPPSHTPAPPPPPPPPSSSLPPPPPPPPPSSTRPPPPPPAQTTPPPIQTAAAAHFGAGLGGVLAIAALVM
MGG_06786	0	3	6.6	Disulfide-isomerase A6 precurso	MHHPTSLCAVATAVLAILPGAQAGFYPKSSGVLEITGKNYQDLVANSNKTTILEFFAPWCGHCKNLKPAYEKAAKNLEGLAKVAAIDCDDEMNKPFCGSMGIQGFPTLKIVRPPMNKGKPLVEDYNGPRSPSGIVDAVVERINNHVKRVTDKDLDDFLSKTEGPKAILFTEKGTVSTLLKGVAIDFLDVIKIAQIRNKEKGAVEKFGIEKFPTLILIPGKGEEPIKYDGPVKRADMVKFLSQAGGPNPDPAPKKKADKKSKKAGTKKAEPEDTPSAESAESTETVKTPVITEAAPPIPTIHDSSKLAKECLNEKSTTCVLAFVPAEAERSKDTQAALDALADLVHKYAQAKRKLFPFFAIPSSNPSSASVIKALELGDKPIQLVAVNARRNWWRQHPGE…
MGG_05051	0	1	9.5	Putative uncharacterized protein	MLCRRALSIFLLVVAPVTQAANLCFFPGGKQAADVPCDLKAQVSMCCGSVAACLSNGLCKDEKTTNETGVAYARGTCTDPTWQSPICPQHCQLNQDTPRNSSAFDFRLNGVQMWECDAQGYGNPANYCCESAAEKTRCCATQSAVFRLAAATPGNALAIQTYIPPVPTPTTLQTAPAPTSGLDSARATSTGAPVPGPAAANSNGPLDRNGLIAVGVGAGLGGAALASIVVMLLVRRMTRRDQTSQVSAVSSQSDYYYQGPPPGSQAGDVAKWQTLTRYDTAEMDRGAGHARYWAAAEAKDGMDPYRTPRLGTPNESPVMGRPSPTAQFGVGLGLDKRPLPPTPESEDPNPPPGKKQSIYEMPGW
MGG_13977	0	1	6.3	Alkaline proteinase	MHFHPVLALCLATAAGTGVVVAQSSPLPPPPRLPQLPQLPKLPQAGDFKATNADYGIDPKEELIPAPRQNHKSAPKRFIVELKEGADLSSLTSKTTGNVKVLKVFNTDVFRGAVVETDEDNVDSLRALRSVGQAWHSKRIMLDPVMPEMLVRGGAQTGVKLSRQNRDEGVRQISVHHMTGVDELHARGILGKGVKVAVVDSGIDYTHPALGGAFGAGNKVVGGYDLIGDTDWPFVQKQPDDDPMDHQGHGTHVAGIIAGKDELITGVAPEATLLAYKVFGENKGTDEDTLIEAFLRAYQDGADVITASIGGLNGWSNNAWALVASRLVERGIVVTISAGNDGQAGPFGASSGATGINVVSVASVQGDVIASPRFIASFQDGNNATQSSEKMPYRTSETW…
MGG_03670	0	1	6.5	Subtilisin-like proteinase Spm1	MKSVILLSLAACAVAAPTAGVETIHDGAAPILSSSNAEAIPNAYIIKFKKHVDHKSAADHQMWIQKVHGEREDERLELRKRGLFDSVNDAFTGLKHTYNVGSGFLGYAGHFDEETIEKVRRHPDVEAIERDTIVHTMRYEEVKKDECNPDLEKGAPWGLSRVSHRESLSFSTYNKYLYSAEGGEGVDAYVIDTGTNIDHVDFEGRAHWGKTIPANDQDIDGNGHGTHCSGTVAGKKYGVAKKAQVYAVKVLKSNGSGTMSDVIAGVDFAAKSHKAQVSAAKDGKRKGFKGSVANMSLGGGKTTLLDAAVNAAVDAGIHFAVAAGNDNADACNYSPAAAAKAVTVGASALDDSRAYFSNWGKCTDIFAPGLNIQSTWIGSKTAINTISGTSMASPHIAGL…
