# Supplementary material for: A fungal core effector exploits the OsPUX8B.2–OsCDC48-6 module to suppress plant immunity
Source: Research Square preprint supplement (doi:10.21203/rs.3.rs-3085022/v1), 2023-07-18
Supplement: Supplementary file 4 [file b305b31306021a1136ddd43a.xlsx]

## Sheet: Sheet1
Extended Data Table 5. Primers used in this study.
Primer name	Primer sequence (5'–>3')	Purpose
MoMLE1 AF	CGGGATCCGTGCCAAGACCTTACAAA	For knock-out of MoNLE1
MoMLE1 AR	AAGAATTCTAGAGGGAACCAAGACAA
MoMLE1 BF	CCCAAGCTTTCTTGGCTTTGGCATCTT
MoMLE1 BR	TCCCTCGAGACTGAGTCACCCTTGCTATT
MoMLE1 UA	TTGAGCCGTCGAACCATAA
MoMLE1 DB	TGAGTTCTCGCATCTTGATG
MoMLE1 NF	CGTTCAACTCGGGCAAG
MoMLE1 NR	CTGAAGGCTGCCAGTGCG
MoNLE1_NGF	CGACTCACTATAGGGCGAATTGGGTACTCAAATTGGTTACGCACTACCCGCTCGACTC	For complementation of monle1 mutant
MoMLE1_RGR	CACCACCCCGGTGAACAGCTCCTCGCCCTTGCTCACGTTTTGGGCCAGGGGCGCAG
MoNLE1_Psuc2_sp_F:	CCGGAATTC ATGCAGATCACCAAGA	For yeast trap experiment
MoNLE1_Psuc2_sp_R:	AATCTCGAGCTGCAGAGCAAGCGC
35S:MoNLE1-F	TAGAACTAGTGGATCCATGCTGCAGGCCGCCGACGAG	For making constructs with 35S promoter-driven C-teriminal tagged HA/GFP/mCherry
35S:MoNLE1-R	CCCCCTCGAGGTCGACGTTTTGGGCCAGGGGCGC
35S:OsPUX8B.1-F	TAGAACTAGTGGATCCATGGCGAGGCCGCCGCAG
35S:OsPUX8B.2-R	CCCCCTCGAGGTCGACCCAGTGGTGAAAGCACG
35S:OsPUX8B.1-R	CCCCCTCGAGGTCGACTTCTGTAATCTTTTCTAG
35S:OsPUX8B.3-F	TAGAACTAGTGGATCCATGAATGAGATGCTGGTGTTC
35S:OsPUX8A-F	TAGAACTAGTGGATCCATGGTGAGGCCGACGCAG
35S:OsPUX8A-R	CCCCCTCGAGGTCGACTCCTGAAATCTGCTCTAGAAAC
35S:OsPUX8B.2ΔUBA-F	TAGAACTAGTGGATCCATGAGAGCCAGTCAAAACAAT
35S:OsPUX8B.2ΔUIM-R	CCTTGCTCTGCTGTAATTGTATCATTGTCATAGTCAGT
35S:OsPUX8B.2ΔUIM-F	ACAATTACAGCAGAGCAAG
35S:OsPUX8B.2ΔUBX-R	CCCCCTCGAGGTCGACAGCTGGCTCTGACGGCA
35S:OsCDC48-1-F	TAGAACTAGTGGATCCATGGCGAGCCAGGGAGAGC
35S:OsCDC48-1-R	CCCCCTCGAGGTCGACATATAAATCATCATCGTCAGCTG
35S:OsCDC48-2-F	TAGAACTAGTGGATCCATGGCGAGCCAGGGGGAG
35S:OsCDC48-2-R	CCCCCTCGAGGTCGACATATAAATCGTCATCATCAGCGA
35S:OsCDC48-4-F	TAGAACTAGTGGATCCATGGTGGAGGCGACGCGG
35S:OsCDC48-4-R	CCCCCTCGAGGTCGACTCTAGATGGTCCCTCAATCT
35S:OsCDC48-5-F	TAGAACTAGTGGATCCATGGGGAAGCGCGCGCGC
35S:OsCDC48-5-R	CCCCCTCGAGGTCGACGCTTGCGGAGTATTTCTTG
35S:OsCDC48-6-F	TAGAACTAGTGGATCCATGGAAGAGGTTAGGGGCAG
35S:OsCDC48-6-R	CCCCCTCGAGGTCGACGTGTTTTCTCCTCGTCAA
35S:OsCDC48-8-F	TAGAACTAGTGGATCCATGGTGGGGATGGAAGGGAAG
35S:OsCDC48-8-R	CCCCCTCGAGGTCGACAAAATTGTCGCTGTTCTCAACA
35S:OsSGS-F	TAGAACTAGTGGATCCATGTCGGCGGACGAGCTG
35S:OsSGS-R	CCCCCTCGAGGTCGACAGGTAATCCCCTCACTGAATC
35S:OsSTI1-F	TAGAACTAGTGGATCCATGGCCGACGAGGCGAAG
35S:OsSTI1-R	CCCCCTCGAGGTCGACTCTCATTTGAACTATTCCAGCGC
35S:OseIF5A-F	TAGAACTAGTGGATCCATGTCGGACTCCGAGGAGC
35S:OseIF5A-R	CCCCCTCGAGGTCGACGTTCTTGGGGCCAATATCC
P2YC-AvrPi9-F	CATTTACGAACGATAGTTAATTAAATGCTTCCCGCCGGCGGTC	For BiFc in Nicotiana benthamiana
P2YC-AvrPi9-R	CACTGCCACCTCCTCCACTAGTCCAGTGCGTCTTTTCGAC
P2YC-NLE1-F	CATTTACGAACGATAGTTAATTAAATGCTGCAGGCCGCCGACGAG
P2YC-NLE1-R	CACTGCCACCTCCTCCACTAGTGTTTTGGGCCAGGGGCG
P2YN-OsPUX8B.2-F	CATTTACGAACGATAGTTAATTAAATGGCGAGGCCGCCGCAG
P2YN-OsPUX8B.2-R	CACTGCCACCTCCTCCACTAGTCCAGTGGTGAAAGCACG
OsPUX8B.2-K269R-F	GATTAGCTACAGAAAGGGTTGGATCATCTAGG	For mutation of putative ubiquitylated Lysins in OsPUX8B.2
OsPUX8B.2-K269R-R	CCTAGATGATCCAACCCTTTCTGTAGCTAATC
OsPUX8B.2-K533R-R	CCCCCTCGAGGTCGACCCAGTGGTGAAAGCACGCCTTGGGTACGACCCTACAGTAGCGAATTA
OsPUX8B.2-K537R-R	CCCCCTCGAGGTCGACCCAGTGGTGAAAGCACGCCCTGGGTACGACCTTACAGTAGCGAATTA
OsPUX8B.2-K533,537R-R	CCCCCTCGAGGTCGACCCAGTGGTGAAAGCACGCCCTGGGTACGACCCTACAGTAGCGAATTA
pGBKT7-MoNLE1-F	ATGGCCATGGAGGCCGAATTCCTGCAGGCCGCCGACGAG	Y2H experiments
pGBKT7-MoNLE1-R	ATGCGGCCGCTGCAGGTCGACCTAGTTTTGGGCCAGGGG
pGBKT7-OsATG8a-F	ATGGCCATGGAGGCCGAATTCATGGCCAGGACTTCCTTC
pGBKT7-OsATG8a-R	ATGCGGCCGCTGCAGGTCGACTTACGCAGAGCCGAATGTG
OsATG8aΔLDS-mutation-R	TAAGATCAGCAGGGACAGCGGCCTTCTTTTTGTCAATT
OsATG8aΔUDS-mutation-F	AGCCCAGAAAAGGCCGCCGCTGCCTTTGTGAAGAACACAT
pGBKT7-OsATG8b-F	ATGGCCATGGAGGCCGAATTCATGGCCAAGAGCTCGTTC
pGBKT7-OsATG8b-R	ATGCGGCCGCTGCAGGTCGACCTAGAGCAGCCCAAAGGTG
pGBKT7-OsATG8c-F	ATGGCCATGGAGGCCGAATTCATGGCGAGGAGCTCGTTC
pGBKT7-OsATG8c-R	ATGCGGCCGCTGCAGGTCGACTCAGACAAACAGGCCGAAG
pGBKT7-OsCDC48-1-F	ATGGCCATGGAGGCCGAATTCATGGCGAGCCAGGGAGAGC
pGBKT7-OsCDC48-1-R	ATGCGGCCGCTGCAGGTCGACACTATATAAATCATCATCGTCAGCTG
pGBKT7-OsCDC48-2-F	ATGGCCATGGAGGCCGAATTCATGGCGAGCCAGGGGGAG
pGBKT7-OsCDC48-2-R	ATGCGGCCGCTGCAGGTCGACACTATATAAATCGTCATCATCAGCGA
pGBKT7-OsCDC48-4-F	ATGGCCATGGAGGCCGAATTCATGGTGGAGGCGACGCGG
pGBKT7-OsCDC48-4-R	ATGCGGCCGCTGCAGGTCGACTCATCTAGATGGTCCCTCAATCT
pGBKT7-OsCDC48-5-F	ATGGCCATGGAGGCCGAATTCATGGGGAAGCGCGCGCGC
pGBKT7-OsCDC48-5-R	ATGCGGCCGCTGCAGGTCGACTCAGCTTGCGGAGTATTTCTTG
pGBKT7-OsCDC48-6-F	ATGGCCATGGAGGCCGAATTCATGGAAGAGGTTAGGGGCAG
pGBKT7-OsCDC48-6-R	ATGCGGCCGCTGCAGGTCGACTTAGTGTTTTCTCCTCGTCAATGG
pGBKT7-OsCDC48-8-F	ATGGCCATGGAGGCCGAATTCATGGTGGGGATGGAAGGGAAG
pGBKT7-OsCDC48-8-R	ATGCGGCCGCTGCAGGTCGACTTAAAAATTGTCGCTGTTCTCAACA
pGADT7-OsPUX8B.1/2-F	ATGGAGGCCAGTGAATTCATGGCGAGGCCGCCGCAG
pGADT7-OsPUX8B.1-R	AGCTCGAGCTCGATGGATCCCTATTCTGTAATCTTTTCTAG
pGADT7-OsPUX8B.2-R	AGCTCGAGCTCGATGGATCCTCACCAGTGGTGAAAGCACG
pGADT7-OsPUX8B.3-F	ATGGAGGCCAGTGAATTCATGAATGAGATGCTGGTGTTC
pGADT7-OsPUX8B.2N-R	AGCTCGAGCTCGATGGATCCTGTAGCTAATCCTTGCCTTC
pGADT7-OsPUX8B.2C-F	ATGGAGGCCAGTGAATTCGAAAAGGTTGGATCATCTAGG
pGADT7-OsPUX8B.2ΔUBX-R	AGCTCGAGCTCGATGGATCCAGCTGGCTCTGACGGCA
pGADT7-OsPUX8B.2UBX-F	ATGGAGGCCAGTGAATTCAGTCTTGCATCCAAACAAG
pGADT7-OsPUX8B.2ΔUBA-F	ATGGAGGCCAGTGAATTCAGAGCCAGTCAAAACAA
pGADT7-OsPUX8A-F	ATGGAGGCCAGTGAATTCATGGTGAGGCCGACGCAG
pGADT7-OsPUX8A-R	AGCTCGAGCTCGATGGATCCCTATCCTGAAATCTGCTCTAGAAAC
pGADT7-OsPUX8A-C-F	ATGGAGGCCAGTGAATTCGGGAAAGTTGGAACATCTG
pGADT7-OsPUX7A-F	ATGGAGGCCAGTGAATTCATGGCCGGCGCTCCCCCGA
pGADT7-OsPUX7A-R	AGCTCGAGCTCGATGGATCCTTAGTCCCACAAAAGGTTGATCATC
pGADT7-OsPUX7B-F	ATGGAGGCCAGTGAATTCATGGACAACGCCGCTGCC
pGADT7-OsPUX7B-R	AGCTCGAGCTCGATGGATCCCTAAGTATCCAAAATTACTGAGACA
pGADT7-OsPUX7C-F	ATGGAGGCCAGTGAATTCATGGCGGGAAGCGACATG
pGADT7-OsPUX7C-R	AGCTCGAGCTCGATGGATCCTCAGTGTCCGTCACTGGGG
pGADT7-OsPUX7C-C-F	ATGGAGGCCAGTGAATTCGTGCTCGGCAACAGCAAC
PNL-OsCDC48-1-F	GGGGACGAGCTCGGTACCATGGCGAGCCAGGGAGAGC	LCI experiments
PNL-OsCDC48-1-R	ACGAGATCTGGTCGACATATAAATCATCATCGTCAGCTG
PNL-OsCDC48-2-F	GGGGACGAGCTCGGTACCATGGCGAGCCAGGGGGAG
PNL-OsCDC48-2-R	ACGAGATCTGGTCGACATATAAATCGTCATCATCAGCGA
PNL-OsCDC48-4-F	GGGGACGAGCTCGGTACCATGGTGGAGGCGACGCGG
PNL-OsCDC48-4-R	ACGAGATCTGGTCGACTCTAGATGGTCCCTCAATCT
PNL-OsCDC48-5-F	GGGGACGAGCTCGGTACCATGGGGAAGCGCGCGCGC
PNL-OsCDC48-5-R	ACGAGATCTGGTCGACGCTTGCGGAGTATTTCTTG
PNL-OsCDC48-6-F	GGGGACGAGCTCGGTACCATGGAAGAGGTTAGGGGCAG
PNL-OsCDC48-6-R	ACGAGATCTGGTCGACGTGTTTTCTCCTCGTCAATGG
PNL-OsCDC48-8-F	GGGGACGAGCTCGGTACCATGGTGGGGATGGAAGGGAAG
PNL-OsCDC48-8-R	ACGAGATCTGGTCGACAAAATTGTCGCTGTTCTCAACA
PCL-OsCDC48-1-F	ACGCGTCCCGGGGCGGTACCATGGCGAGCCAGGGAGAG
PCL-OsCDC48-1-R	CGAAAGCTCTGCAGGTCGACCTAACTATATAAATCATCATCG
PCL-OsCDC48-2-F	ACGCGTCCCGGGGCGGTACCATGGCGAGCCAGGGGGAG
PCL-OsCDC48-2-R	CGAAAGCTCTGCAGGTCGACCTAACTATATAAATCGTCATCATC
PCL-OsCDC48-4-F	ACGCGTCCCGGGGCGGTACCATGGTGGAGGCGACGCGG
PCL-OsCDC48-4-R	CGAAAGCTCTGCAGGTCGACTCATCTAGATGGTCCCTCAA
PCL-OsCDC48-5-F	ACGCGTCCCGGGGCGGTACCATGGGGAAGCGCGCGCG
PCL-OsCDC48-5-R	CGAAAGCTCTGCAGGTCGACTCAGCTTGCGGAGTATTTCT
PCL-OsCDC48-6-F	ACGCGTCCCGGGGCGGTACCATGGAAGAGGTTAGGGGCAG
PCL-OsCDC48-6-R	CGAAAGCTCTGCAGGTCGACTTAGTGTTTTCTCCTCGTCA
PCL-OsCDC48-8-F	ACGCGTCCCGGGGCGGTACCATGGTGGGGATGGAAGGG
PCL-OsCDC48-8-R	CGAAAGCTCTGCAGGTCGACTTAAAAATTGTCGCTGTTCTC
MoNLE1-q-F	AAGCTCATCAACCGCCCTAC	QPCR analysis
MoNLE1-q-R	TTTACATGCTGGGCCCTTGG
OsPUX8B total-F	AAGGAATAACACAGCCGCCA
OsPUX8B total-R	AATGCCACCCCACTCTGATG
OsPUX8B.1-q-F	TGTAGTCCGCATGCCTGATG
OsPUX8B.1-q-R	AAGGCTTCCTGCTTGCTTGT
OsPUX8B.2-q-F	TCGTCGCCTGGAAGAAACTG
OsPUX8B.2-q-R	GGTACGACCTTACAGTAGCGAA
OsPUX8B.3-q-F	ATGAATGAGATGCTGGTGTTC
OsPUX8B.3-q-R	TAGGGTGTGAAACCTGTGGG
OsCDC48-6-q-F	CGGGAGCTCGTGATGTATCC
OsCDC48-6-q-R	GGGACCCTTGCTCTCTCCTA
OsBHT-q-F	TGACGAAGACATGAAGCGCA
OsBHT-q-R	TCACTGAATCGGCGGTCTTC
MoPot2-Fw	ACGACCCGTCTTTACTTATTTGG
MoPot2-Rev	AAGTAGCGTTGGTTTTGTTGGAT
q-Ubq-Fw	CGCAAGAAGAAGTGTGGTCA
q-Ubq-Rev	GGGAGATAACAACGGAAGCA
q-gUBQ-Fw	TTCTGGTCCTTCCACTTTCAG
q-gUBQ-Rev	ACGATTGATTTAACCAGTCCATGA
OsPUX8B-CR-F	tgttGTATCTCTCGCACCTCTCTA	For making CRISPR-Cas9 constructs
OsPUX8B-CR-R	aaacTAGAGAGGTGCGAGAGATAC
CDC48-6-CR-entryF	tgttGAGAGCAAAGACCACCGCGG
CDC48-6-CR-entryR	aaacCCGCGGTGGTCTTTGCTCTC
OsBHT-CR-entryF	tgttGCGAGGGCGGAGAGGACGCG
OsBHT-CR-entryR	aaacCGCGTCCTCTCCGCCCTCGC
OsPUX8BCR-ID-F	ATGGTGGCGACCTTAACACG	For identification of CRISPR mutants
OsPUX8BCR-ID-R	GTCATTGCCTCAGCATCCCT
OsCDC48-6CR ID-F	CTTTGAATGGGCCGGAAATG
OsCDC48-6CR ID-R	GCTGGTCTACCCTGTGATGC
OsBHT-CR-ID-F	TCATATCCCACCACCGGAAAGA
OsBHT-CR-ID-R	GACCCCAACGTCACGTAGCTCA
pRTV-OsPUX8B.1-F	CCAGATCCAGTGGGATCCATGGCGAGGCCGCCGCAG	For making Ubip driven N-teriminal HA constructs for rice protoplast transformation
pRTV-OsPUX8B.2-R	GGCCGCACTAGTAAGCTTCCAGTGGTGAAAGCACG
pRTV-OsPUX8B.1-R	GGCCGCACTAGTAAGCTTTTCTGTAATCTTTTCTAG
pRTV-PUX8B.2 ΔUBA-F	CCAGATCCAGTGGGATCCATGAGAGCCAGTCAAAACAAT
pRTV-PUX8B.2 ΔUBX-R	GGCCGCACTAGTAAGCTTAGCTGGCTCTGACGGCA
PRHVCHA-MoNLE1-F	CCAGATCCAGTGGGATCCATGCTGCAGGCCGCCGACG	For making overexpression consturcts used for rice plant transformation
PRHVCHA-MoNLE1-R	GGCCGCACTAGTAAGCTTGTTTTGGGCCAGGGGC
PRHVCHA-OsPUX8B.1-F	CCAGATCCAGTGGGATCCATGGCGAGGCCGCCGCAG
PRHVCHA-PUX8B.1-R	AAGCTTGGTACCGAGCTCTTCTGTAATCTTTTCTAG
PRHVCHA-PUX8B.2-R	AAGCTTGGTACCGAGCTCCCAGTGGTGAAAGCACG
PRHVCHA-PUX8B.3-F	CCAGATCCAGTGGGATCCATGAATGAGATGCTGGTGTTC
PRHVCHA-PUX8B.3-R	AAGCTTGGTACCGAGCTCTTCTGTAATCTTTTCTAG
PRHVCHA-GFP-F	CCAGATCCAGTGGGATCCATGGTGAGCAAGGGCGAG
PRHVCHA-GFP-R	AAGCTTGGTACCGAGCTCCTTGTACAGCTCGTCCATG
PRHVCHA-OsCDC48-6-F	CCAGATCCAGTGGGATCCATGGAAGAGGTTAGGGGC
PRHVCHA-OsCDC48-6-R	GGCCGCACTAGTAAGCTTGTGTTTTCTCCTCGTCAATG
pRHVcGFP-OsBHT-F	CCAGATCCAGTGGGATCCATGTCGGCGGACGAGC
pRHVcGFP-OsBHT-R	AAGCTTGGTACCGAGCTCAGGTAATCCCCTCACTG
