# Supplementary material for: A fungal core effector exploits the OsPUX8B.2–OsCDC48-6 module to suppress plant immunity
Source: Research Square preprint supplement (doi:10.21203/rs.3.rs-3085022/v1), 2023-07-18
Supplement: Supplementary file 5 [file e756e2a90b1ca31962d62d52.xlsx]

## Sheet: Sheet1
Extended Data Table 3. Information about the proteins used in this study.
Protein name	Protein ID	Organism	Mutation	Sequence
MoNLE1	MGG_04776	Magnaporthe oryzae	N/A	MQITKILQLAAFLAIGAPALALQAADEPALQARGVEDSFNSGKLINRPTGAGDPVAADIRAPVGAPAGGAAALTGPTSPRGHGSPRACRARSPRAQHVKRALEARAQGSVGAGFGGAGAAPNGQLPGSPGRGSPKRACRARNRSQSPTRSGLQRTGSLQRTGSGPAAPLAQN
Mg87	GenBank: XP_362169.1	Magnaporthe oryzae	N/A	MPVPFETLIPYAIITAMFGISGAGISTVRWYTNGGKRPRRSIDQWDRQMMDRDRRLTGFLRGQSDNPIAPPGFELNNPWRTEERMS
Avr1b	GenBank: AAM20936	Phytophthora sojae	N/A	MRLSFVLSLVVAIGYVVTCNATEYSDETNIAMVESPDLVRRSLRNGDIAGGRFLRAHEEDDAGERTFSVTDLWNKVAAKKLAKAMLADPSKEQKAYEKWAKKGYSLDKIKNWLAIADPKQKGKYDRIYNGYTFHRYQS
AvrPi9	MGG_12655	Magnaporthe oryzae	N/A	MQFSQILTVLFLGVSVSALPAGGLPGSPGSAVQRCHCPPRGSHAHGSLAAREEAPEAEGDAKISARYTCPNCHKTGKGCDDGWCQVEKTHW
OsPUX1	LOC_Os04g40870	Oryza sativa japonica	N/A	MEAEHPHQITYTTTTTTSTSSLCPRRRKRGDDEAAHHLVFPMDLDSAAAAAAAAAHHQQQ QQQTTSQDKLKALAYEYGHEFRVFSSVTFESMTSNLPAADQEEDDDFYELQPADYFNLVS NRIGEQSKVLKTRKMREAELAAQRAKIKKAVMRVRFPDGYILEADFHPSETVQSLMDFLK KVISRPDLPFYLYTVPPKKRIKDTSLDFYTIGFVPGANVYFSYDLPEGSELNTDSVKSGP YLREEIRMLDGLPIVQEPVHQPIDSTMNSSSAHQSDVSQSDFAPPANKKPAKPKWFKR
OsPUX2	LOC_Os09g23690	Oryza sativa japonica	N/A	MMKEKMKDLMRKVTSSSSSSSSSSSFKGTAHVLGSGPDPSSRPSNPTPSRPAAPRREAAA SARPPSSGFAPYSPLISTSSRRTDPPAGAGAGEDDAVACPSCAEPFPSELAVSDHLDGCL AAAGGARPRAAAYLAGDPPASAVEVVKRLLGNLLSDPRNDKYRKVRLGNPRIKEALADRE GGVDLLEAVGFRVADEGGELFALMDEVPGDARLGGIRQAVLLLERARPSTPPQTQADAKE TCPNGVSEEQGIKKPVDRQIRVFFSVAASSVAENDLPDSFYSLSNEEIRNEAKMRRERLE QSRLLIPKSYKEKQALAARQKYKQALIRIQFPDGVILQGVFLPAEPISSLYEFVASSLKQ PSLEFDLICPAGPRTRVIPPFPKPGEQARTLRD…
OsPUX4A	LOC_Os04g39040	Oryza sativa japonica	N/A	MSSSNNGGGGDKKPASGGRGGPTIRTLADISRGPSGFPGGGGGGGSDSDEPQEYYTGGEK SGMLVQDPTRRNTVDSIFEQARQMGALQDQPPPFEDQSSSSRSFTGTGRLLSGETAPAAP PPPGNVLHNIQFWNNGFTVDDGPLRDYDDPANADFIESIKKSQCPQELEPADRRTPVHVN VIKRLEDYQAPLRPPSPFQGVGRTLGGGSSAEESQAPAPATQEPRRSVGIVVDDSLPFTS IQLRLADGTRMVARFNMHHTVGDIRSFIDASRPGATRPYQLQTGFPPKQLADPAQTVEQA GLANSVIIQKM
OsPUX4B	LOC_Os06g42810	Oryza sativa japonica	N/A	MAAGDAARAPPAAEAQSLVESFCGVTSATPQEAAFFLESHNWALESAVRSFYDSADGDAS AAAADAADPPPRQPPPPPPASDGADSDDEDYVVGGGDEDQDDEDYVGDGDGDGEGDDDDD EDAALAAEEAAASDERRRPLKRLKRGQNARGGSGSGKGNVRTLSDLGGGKDSAGSEDSED DEYKPPQELYTGGEKSGMVVRDRSKRKNRADEIFKEAKRKGAKKGSFEARRKSKSFAGTG RLLTGESAEPVAPQSPESIVHNIYFWTNGFTVNDGPLRSFDDPANASFLKSIKNSECPSE LEPADKKSQVNVNLVRKEEKCPEPVKRAAPFHGAAKTLGTPSDNNSTPPEATSAAAAASS TETASKTVTITVDDSLPSTSLQIRFVDGSRMVA…
OsPUX7A	LOC_Os04g57520	Oryza sativa japonica	N/A	MAGAPPTEAEKESLVTSFLEIAAGQTPETATQFLQMTSWHLEEALQLFYIDGEAALAAHP APSPAAAAEAAAAAVAAAAEVEDAMRFAPPPAAALGDGMLQGLGEEEDVRAPLPTKRETL YGDAPMVVVRPNSTVAFRNFEEESRQSAVWDSEQNAASSSRDNLAALYRPPFALMFNGPF DKAKLEASVLDKWLLINLQSTEEFSSHMLNRDTWANEAVAQTIRSNFIFWQVYHDTSEGR KVCTYYNLVSVPAILLIDPITGQKMRGWNGMIHPDRLLEDLMPYLDKGPKEHHAAQPQKR PRKVDQETSIGKQGKTPVPVVATEDEDEELARAVAASLEESKGSDTSEEKIEPEVENEPS LSAKLNYPPLPEEPKGSRELLCRVAIRLPDGRR…
OsPUX7B	LOC_Os02g42800	Oryza sativa japonica	N/A	MDNAAAVATFMEITSCGSQEAAVQHLASCRWDLDAALNRYFIFGGVLAAAPAPAPVADVAPPAALDDGVRAPIPARSDTLYGDMYGGARRRDRDSRPAPSVWEDEPPAVTPSVAPVYIQMPSANPAVAPVQIQMPSETAASVPAAPVPVHAPSQPPVVAIAVKKEQNEKDEEEDNGRDDDDDGYSDSDYGMDTDDDDDRYDECIEKTPSPPPKSTQQQATTLAEMYRRPRELMHDADFHSTKVHAARQDRWLLLNLQSAGEFASQMHNRDLWADQVIARVVRESFVFSLLENSYGDDDDEASKVCCFYKLHDQLPAVLVIDPITGQMLAKWSGVIQPETFLVDIEEYSKSKPSMRSKPYIFQRKPMPVRSAPAASEQHHQEPAMVDTAAPMDIHNVQEP…
OsPUX7C	LOC_Os02g31300	Oryza sativa japonica	N/A	MAGSDMDDLVARFMDITMLDSRDAAANHIRSCRGSLDDALALYFAAADDEPPIRPPIPTR TERLYGDDDDDDHGHLTATPPPPPPPPPPVPVVRPPMPVPARTESFFQDAGYLRAVLGNS NVVEEEDGDAASDYGEATEGEEACSVRVRFPDGRVVQKEFGAARPVEALFRYCHRHSVSA AGGGRRAFRLVRFAGAASEEIRRGDATFQQLGLHCWTLHLLFGLGPRAPSDGH
OsPUX8A	LOC_Os08g43300	Oryza sativa japonica	N/A	MVRPTQDAIDTFVGITGADEAVAARKLEEHHGDLNEAVNAYFNEGDRTSTRANENPIPTG YDDMELDEPFGPVPTFHMPLGNPFSLLDQGFLERAAAVYGEGPHITHPREVRRIDVEVKD NNTPAGSSGHGPVIEDVTGHEFSHGPEIRGTVLIDEDDDDDNLPSAQDTRLPSNPSTSNY SVPRAPPIANVSDYNNDIEEEMVRAAIEASKRDADGLTNGLRSGERENASRGRDDDEIAR AVSMSLETAEQERVLRQVGAHVSDHSDLSDKEDIEGATGTVERQVPTSGKVGTSDQLVDE ENFQDDDVEEHSFVRQHSRRVPSGNDESTEALERANSHPSSLLPHNIENNQQFNGVFPSE WGGISSEEHDEAVMLEAAMFGGIPGRAAYPFSL…
OsPUX8B.1	LOC_Os09g35710	Oryza sativa japonica	N/A	MARPPQEAIDTFVSITGADEALAVRKLEEHGGDLNTAINAHFNEGDSTVNRASQNNIPES HDDMMDLDGPLDNAFRRSLFPETLRDPFALMDTNFQQNYFDRVGSTDTFGHGPQVSHPRE VREIPIEVKDSNPQTGPSGQAPIIEDVTGHESSYGPEVRGAIVIDDDDDEQPSAPSLHAN IDSSLQPNPSIPTAPPLVHVTDYDNDIEEEMIRAAIEASKRDAEAMTITAEQGITQPPEG VNITEHSFDEEDKGTASGTAGRQGLATEKVGSSRQPIDEDTLQEETEDVEEQPLVRRRSR RIPSGNTESAQPVYTVDSPPSSSQPQGNLNDRQNNGDEFPSEWGGISSEEHDEAVMLEAA MFGGIPEGPMYPFSMPSHRSPSLYPHVEHAPSP…
OsPUX8B.2	LOC_Os09g35710	Oryza sativa japonica	N/A	MARPPQEAIDTFVSITGADEALAVRKLEEHGGDLNTAINAHFNEGDSTVNRASQNNIPESHDDMMDLDGPLDNAFRRSLFPETLRDPFALMDTNFQQNYFDRVGSTDTFGHGPQVSHPREVREIPIEVKDSNPQTGPSGQAPIIEDVTGHESSYGPEVRGAIVIDDDDDEQPSAPSLHANIDSSLQPNPSIPTAPPLVHVTDYDNDIEEEMIRAAIEASKRDAEAMTITAEQGITQPPEGVNITEHSFDEEDKGTASGTAGRQGLATEKVGSSRQPIDEDTLQEETEDVEEQPLVRRRSRRIPSGNTESAQPVYTVDSPPSSSQPQGNLNDRQNNGDEFPSEWGGISSEEHDEAVMLEAAMFGGIPEGPMYPFSMPSHRSPSLYPHVEHAPSPALTEQR…
OsPUX8B.3	LOC_Os09g35710	Oryza sativa japonica	N/A	MNEMLVFYRNRASQNNIPESHDDMMDLDGPLDNAFRRSLFPETLRDPFALMDTNFQQNYFDRVGSTDTFGHGPQVSHPREVREIPIEVKDSNPQTGPSGQAPIIEDVTGHESSYGPEVRGAIVIDDDDDEQPSAPSLHANIDSSLQPNPSIPTAPPLVHVTDYDNDIEEEMIRAAIEASKRDAEAMTITAEQGITQPPEGVNITEHSFDEEDKGTASGTAGRQGLATEKVGSSRQPIDEDTLQEETEDVEEQPLVRRRSRRIPSGNTESAQPVYTVDSPPSSSQPQGNLNDRQNNGDEFPSEWGGISSEEHDEAVMLEAAMFGGIPEGPMYPFSMPSHRSPSLYPHVEHAPSPALTEQRLLREQQDDEYLASLQADQEKELKALQEAELRRLEETAARE…
OsPUX10A	LOC_Os10g37630	Oryza sativa japonica	N/A	MAETVDDKVSYFQAVTGISDHDLCTEILAAHNWDLQLAVSSITANPSSPDPAPSAPLPPL APREADLVAPHLPPPPQQQQQQQQPGIAWKLVTLPFYVVSGGVGLIAGSIRLGAWVAGGV LSRSLSILGLAQGGGGGGDRLLELPPSAAEAADFVAEFEREFGAGRGPHFVAEGFADALQ RAQREYKLLFVYLHSPDHPDTPAFCGGCLCAEPVAAFIDENFVAWGGSIRRTEGFKMSNS LNASRFPFCAVVMASTNQRIVLLRQIEGPKSPEEMITTLQGAVEECSASLVAARIDAEER LNNQRLREEQDAAYRAALEADQARERQRREEQEKREREAAEAERKRKEEEEAQERAAQEA AEKEAALARRRQEKAMALGAEPEKGPDVTRVLI…
OsPUX10B	LOC_Os09g30411	Oryza sativa japonica	N/A	MPSPTSSASAAARGSAGAGDTLRNSCHDFARSLARLPASIMDGLSRSMARRSRRPRDTQP HPPLPPPLLPEELFFAEFERRYGGRHPFFYGCRLAEALGIARREGRLVFVYLHDAGGGGN PYADQFCTGTMCSDVVVEFLDANFVSWGAVAGRGEGAAMVAALRPGSFPFCAVVSPVSDE SIVILQQVEGPVSPSELVDILQRTIDEQRASSRQSWPDEQLAAAVRASRADEEERMRSVA LRLRQEQDAAYLESLRKDQEKERSRKSVQEGSAKPKASNVLRPRYPGQSAREPNKAAQAR APAQNQNGTVASHRAEANTKIMIRFPNGERRQQAFHHTDTIREIYRYVDSLGIPGIGNYQ LVRSYPRKTYGRQQLEMSLQDAGFYPSVTLYIE…
OsPUX11	LOC_Os11g18880	Oryza sativa japonica	N/A	MERALDSLTYKGSIPDAILQSRRDNKLFVVYISGEDETSSSLEQSTLVNESVAEVIGNCC VFLHLKQGNVDASQFSAIYPQKAIPSISVIGQNGVMLWCHEGYISSKDLKENIEKAWATL HLQGTAAAFLTASLASRMTEPVNTTPTTLPTQGGSSAAENPSTSSNQSTGTSGASGFANP TDSVAQPPRSTSRDETPSISEKESSNLDSSPGNRTVQERPDSDSAQVKGSLPDHPRSSNI EGCANPVQSGNTASLKQKNKVDDGFTKVSSESVPTRVASRGKSSKVAVDQDKATTTSTPI EPAPVRSNDIQLVVRIPDGPSLQIKLTKDDNLRKVKNFVDENRANGAGSYDLAMLYPRKV FTEQDMEATLHELGIETRQALTIVPHHKTIRAA…
OsPUX7C-C	N/A	Oryza sativa japonica	OsPUX7C Δ aa 1-115	VLGNSNVVEEEDGDAASDYGEATEGEEACSVRVRFPDGRVVQKEFGAARPVEALFRYCHRHSVSAAGGGRRAFRLVRFAGAASEEIRRGDATFQQLGLHCWTLHLLFGLGPRAPSDGH
OsPUX8A-C	N/A	Oryza sativa japonica	OsPUX8A Δ aa 1-288	GKVGTSDQLVDEENFQDDDVEEHSFVRQHSRRVPSGNDESTEALERANSHPSSLLPHNIENNQQFNGVFPSEWGGISSEEHDEAVMLEAAMFGGIPGRAAYPFSLPYHQNSSRYPTVAHPPSPTLTAQRLLREQQDDEYLASLEADREKELKAEQEAELRRLEAAAEREAAIAKQKQEEEEKRRKQLEEEELESKLAAKQASLPKEPLPDDVGAVTVVVRMPDGRRQGRRFMKSDNLQVLFDFIDISRTFKPGTYRLVRSYPRRAFTDSESQMSLSDLGLNSKQEALFLEQISG
OsPUX8B.1-C	N/A	Oryza sativa japonica	OsPUX8B.1 Δ aa 1-267	EKVGSSRQPIDEDTLQEETEDVEEQPLVRRRSRRIPSGNTESAQPVYTVDSPPSSSQPQGNLNDRQNNGDEFPSEWGGISSEEHDEAVMLEAAMFGGIPEGPMYPFSMPSHRSPSLYPHVEHAPSPALTEQRLLREQQDDEYLASLQADQEKELKALQEAELRRLEETAAREAALEKQKQEEEERRKKQLEEEELESSLASKQASLPSEPAADEEGAVTLVVRMPDGSRQGRRFLKSHKLQFLFDFLDIGRTYKPGTYRLVRSYPRRAFTTGEGDMSFSDLGLTSKQEALFLEKITE
OsPUX8B.2-C	N/A	Oryza sativa japonica	OsPUX8B.2 Δ aa 1-267	EKVGSSRQPIDEDTLQEETEDVEEQPLVRRRSRRIPSGNTESAQPVYTVDSPPSSSQPQGNLNDRQNNGDEFPSEWGGISSEEHDEAVMLEAAMFGGIPEGPMYPFSMPSHRSPSLYPHVEHAPSPALTEQRLLREQQDDEYLASLQADQEKELKALQEAELRRLEETAAREAALEKQKQEEEERRKKQLEEEELESSLASKQASLPSEPAADEEGAVTLVVRMPDGSRQGRRFLKSHKLQFLFDFLDIGRTYKPGTYRLVIRYCKVVPKACFHHW
OsPUX8B.2-N	N/A	Oryza sativa japonica	OsPUX8B.2 Δ aa 268-543	MARPPQEAIDTFVSITGADEALAVRKLEEHGGDLNTAINAHFNEGDSTVNRASQNNIPESHDDMMDLDGPLDNAFRRSLFPETLRDPFALMDTNFQQNYFDRVGSTDTFGHGPQVSHPREVREIPIEVKDSNPQTGPSGQAPIIEDVTGHESSYGPEVRGAIVIDDDDDEQPSAPSLHANIDSSLQPNPSIPTAPPLVHVTDYDNDIEEEMIRAAIEASKRDAEAMTITAEQGITQPPEGVNITEHSFDEEDKGTASGTAGRQGLAT
OsPUX8B.2 ΔUBA	N/A	Oryza sativa japonica	OsPUX8B.2 Δ aa 1-50	VNRASQNNIPESHDDMMDLDGPLDNAFRRSLFPETLRDPFALMDTNFQQNYFDRVGSTDTFGHGPQVSHPREVREIPIEVKDSNPQTGPSGQAPIIEDVTGHESSYGPEVRGAIVIDDDDDEQPSAPSLHANIDSSLQPNPSIPTAPPLVHVTDYDNDIEEEMIRAAIEASKRDAEAMTITAEQGITQPPEGVNITEHSFDEEDKGTASGTAGRQGLATEKVGSSRQPIDEDTLQEETEDVEEQPLVRRRSRRIPSGNTESAQPVYTVDSPPSSSQPQGNLNDRQNNGDEFPSEWGGISSEEHDEAVMLEAAMFGGIPEGPMYPFSMPSHRSPSLYPHVEHAPSPALTEQRLLREQQDDEYLASLQADQEKELKALQEAELRRLEETAAREAALEKQKQ…
OsPUX8B.2 ΔUIM	N/A	Oryza sativa japonica	OsPUX8B.2 Δ aa 207-226	MARPPQEAIDTFVSITGADEALAVRKLEEHGGDLNTAINAHFNEGDSTVNRASQNNIPESHDDMMDLDGPLDNAFRRSLFPETLRDPFALMDTNFQQNYFDRVGSTDTFGHGPQVSHPREVREIPIEVKDSNPQTGPSGQAPIIEDVTGHESSYGPEVRGAIVIDDDDDEQPSAPSLHANIDSSLQPNPSIPTAPPLVHVTDYDNDTITAEQGITQPPEGVNITEHSFDEEDKGTASGTAGRQGLATEKVGSSRQPIDEDTLQEETEDVEEQPLVRRRSRRIPSGNTESAQPVYTVDSPPSSSQPQGNLNDRQNNGDEFPSEWGGISSEEHDEAVMLEAAMFGGIPEGPMYPFSMPSHRSPSLYPHVEHAPSPALTEQRLLREQQDDEYLASLQADQEK…
OsPUX8B.2 ΔUBX	N/A	Oryza sativa japonica	OsPUX8B.2 Δ aa 479-543	MARPPQEAIDTFVSITGADEALAVRKLEEHGGDLNTAINAHFNEGDSTVNRASQNNIPESHDDMMDLDGPLDNAFRRSLFPETLRDPFALMDTNFQQNYFDRVGSTDTFGHGPQVSHPREVREIPIEVKDSNPQTGPSGQAPIIEDVTGHESSYGPEVRGAIVIDDDDDEQPSAPSLHANIDSSLQPNPSIPTAPPLVHVTDYDNDIEEEMIRAAIEASKRDAEAMTITAEQGITQPPEGVNITEHSFDEEDKGTASGTAGRQGLATEKVGSSRQPIDEDTLQEETEDVEEQPLVRRRSRRIPSGNTESAQPVYTVDSPPSSSQPQGNLNDRQNNGDEFPSEWGGISSEEHDEAVMLEAAMFGGIPEGPMYPFSMPSHRSPSLYPHVEHAPSPALTEQR…
OsPUX8B.2 K269R	N/A	Oryza sativa japonica	OsPUX8B.2 K269R	MARPPQEAIDTFVSITGADEALAVRKLEEHGGDLNTAINAHFNEGDSTVNRASQNNIPESHDDMMDLDGPLDNAFRRSLFPETLRDPFALMDTNFQQNYFDRVGSTDTFGHGPQVSHPREVREIPIEVKDSNPQTGPSGQAPIIEDVTGHESSYGPEVRGAIVIDDDDDEQPSAPSLHANIDSSLQPNPSIPTAPPLVHVTDYDNDIEEEMIRAAIEASKRDAEAMTITAEQGITQPPEGVNITEHSFDEEDKGTASGTAGRQGLATERVGSSRQPIDEDTLQEETEDVEEQPLVRRRSRRIPSGNTESAQPVYTVDSPPSSSQPQGNLNDRQNNGDEFPSEWGGISSEEHDEAVMLEAAMFGGIPEGPMYPFSMPSHRSPSLYPHVEHAPSPALTEQR…
OsPUX8B.2 K533R	N/A	Oryza sativa japonica	OsPUX8B.2 K533R	MARPPQEAIDTFVSITGADEALAVRKLEEHGGDLNTAINAHFNEGDSTVNRASQNNIPESHDDMMDLDGPLDNAFRRSLFPETLRDPFALMDTNFQQNYFDRVGSTDTFGHGPQVSHPREVREIPIEVKDSNPQTGPSGQAPIIEDVTGHESSYGPEVRGAIVIDDDDDEQPSAPSLHANIDSSLQPNPSIPTAPPLVHVTDYDNDIEEEMIRAAIEASKRDAEAMTITAEQGITQPPEGVNITEHSFDEEDKGTASGTAGRQGLATEKVGSSRQPIDEDTLQEETEDVEEQPLVRRRSRRIPSGNTESAQPVYTVDSPPSSSQPQGNLNDRQNNGDEFPSEWGGISSEEHDEAVMLEAAMFGGIPEGPMYPFSMPSHRSPSLYPHVEHAPSPALTEQR…
OsPUX8B.2 K537R	N/A	Oryza sativa japonica	OsPUX8B.2 K537R	MARPPQEAIDTFVSITGADEALAVRKLEEHGGDLNTAINAHFNEGDSTVNRASQNNIPESHDDMMDLDGPLDNAFRRSLFPETLRDPFALMDTNFQQNYFDRVGSTDTFGHGPQVSHPREVREIPIEVKDSNPQTGPSGQAPIIEDVTGHESSYGPEVRGAIVIDDDDDEQPSAPSLHANIDSSLQPNPSIPTAPPLVHVTDYDNDIEEEMIRAAIEASKRDAEAMTITAEQGITQPPEGVNITEHSFDEEDKGTASGTAGRQGLATEKVGSSRQPIDEDTLQEETEDVEEQPLVRRRSRRIPSGNTESAQPVYTVDSPPSSSQPQGNLNDRQNNGDEFPSEWGGISSEEHDEAVMLEAAMFGGIPEGPMYPFSMPSHRSPSLYPHVEHAPSPALTEQR…
AtPUX1	At3g27310	Arabidopsis thaliana	N/A	MFVDDPSLHTLKRRRLEITDSMEASSSAQAKIADMREKLGREVRVFETSSISQRPSQVSSADDESDDFYEFTPADFYRLLATKKEDKSLKTRKIREAEEAARRSKLTKAVIRVRFPDNHTLEATFHPSEKIQGLIDLVKRVVAHPDVPFYLYTTPPKKQIKDFSQDFYSAGFVPGAIVYFSNDQPKDDGGSSTPYLNEEILSLKDLEAMTKAVEPVESSSEPATVDSSAVPVEHERKSTEKKTTKPKWFKM
AtPUX2	At2g01650	Arabidopsis thaliana	N/A	MDDVKDKLKGFMKKVNLSSSSGKFKGQGRVLGSSSSSSAPPVNPIQNRFNSSQAPNPTPRPKPNPNPLPEKPLSSSDQKISGSTRNPDHDPVRAPQDGFDPYGAFITSSNRSQNGYSLSMFECPICKNPFTSEEEVSVHVESCLGDTNGDESSFEKDNNDNDKSEMEKLVVVYLSGKPSESSIDVLLRLFKNIVKEPENAKFRKVRMSNAKIKEAIGDVAGGVELLELVGFELKEENDEIWAVMDVPSEEQSILINKVVGYLEKRKTESSGSSAQVMEPVAPKKIDREIRVFFSVSENVASRIEVPDSFYSLSADEIKREADLRRKKIAESQLLIPRSYKEKQAKAARKRYKRSMIRVQFPDGVVLQGVFAPWEPTFALYEFVSSALKEPSLQFELLDP…
AtPUX3	At4g22150	Arabidopsis thaliana	N/A	MSSKDKKLSKPTSGRTGGIRTLSDLNRRSEPDSDSDSDGPQEYFTGGEKSGMLVQDPTKEPKHDDVDEIFNQARQLGAVEGPLEHPSSSRSFTGTGRLLSGESVPTALQQPEPVIHNIIFWSNGFTVDDGPLRKLDDPENASFLDSIRKSECPKELEPVDKRAPVHVNLMRRDEKCPEKEKLKVSFQGVGRTLGGASSSTASSQSNLTDVAAVQSPLQSLVVDETLPSTSIQLRLADGTRMVAKFNNHHTVNDIRGFIEFSRPGNPNNYTLQVMGFPPKPLTDPSQTIEQAGLASSVVIQKF
AtPUX4	At4g04210	Arabidopsis thaliana	N/A	MSSKDKKPSKPSSSRGGIRTLSDLNRRSGPDSDSDSDGPQEYYTGGEKSGMLVQDPSKKDDVDEIFNQARQLGAVEGPLEPPPSSRSFTGTGRLLSGENVPTGNQQPEPVVHNIVFWSNGFTIDDGPLRKLDDPENASFLESIRKSECPKELEPADRRAPVHVNLMRKEEKCPERQKRRVSFQGVGRTLGGSNEGSGSSSPVAPDSAPIPIQTEPAPSQSLVIDETVPTTSIQLRLADGTRLVAKFNHHHTVNDIRGFIDSSRPGASLNYQLQTMGFPPKPLTDLTQTIEEAGLANSVVLQKF
AtPUX5	At4g15410	Arabidopsis thaliana	N/A	MATETNENLINSFIEITSSSREEANFFLESHTWNLDAAVSTFLDNDAAAAAEPNPTGPPPPSSTIAGAQSPSQSHSPDYTPSETSPSPSRSRSASPSSRAAPYGLRSRGGAGENKETENPSGIRSSRSRQHAGNIRTFADLNRSPADGEGSDSDEANEYYTGGQKSGMMVQDPKKVKDVDELFDQARQSAVDRPVEPSRSASTSFTGAARLLSGEAVSSSPQQQQQEQPQRIMHTITFWLNGFTVNDGPLRGFSDPENAAFMNSISRSECPSELEPADKKIPVHVDLVRRGENFTEPPKPKNPFQGVGRTLGASGSGSSSAPQASSAPMNVAPAPSRGLVVDPAAPTTSIQLRLADGTRLVSRFNNHHTVRDVRGFIDASRPGGSKEYQLLTMGFPPKQ…
AtPUX6	At3g21660	Arabidopsis thaliana	N/A	MDVNSPETTEKHLNEVSADAAKPNVPNPNDELLRRNPSSFPNLRIKIPTSSFSTFDGSSGYSPSRLQLRPPWPSLKRAAANPFSRQNKRRQGAGNVRIDDFSGGTGSDSDEAVEHYGGEENRAIERPEQSSRSMSEETVSSELEEEPQKVFTHTVTSWSNGFTVDDSSLKTLDDPENATFLEIISSMESPRELGQVRVQVKIISREEENYTESQAGSDSASTKPPPALAMRAKESAIERSEQSSKVLSGETDSAELQEQQQEDQPYEVVTYTVTIWRNGFTVDDDPFKSLDDPENAAFLEYMPEDNKFGVPTTTRSTSCSSQTHQELQTLAGSESTSTEPPLTTTQPPSMSSLVVDPAAPTTSIQLILADSTRIVTQFNTHHTIRDIRCFIDTSRPDGS…
AtPUX7	At1g14570	Arabidopsis thaliana	N/A	MEGMLSSGDQQRLVSSFLEIAVGQTAETARQFLQATSWKLEEAIQLFYIGNEGGMLQSGTHTQPASNDDAAAQSWGAATGTGNEMILPNDVDEVRAPLPVVRETLYGESMYYGAMRVGNSQPEPNSLIAFRNFSEEPKSPGIWEPDEGDSSASASASASASESASAPRDSLASLYRPPFHLMFQGSFEQAKTTSSSQDKWLLVNLQSTTEFSSHMLNRDTWANDAVSQTIKANFIFWQVYDDTTEGRKVCTYYKLESIPVVLVIDPTTGQRMRMWTGMVDPENLLEDLVPFMDGGPREHFASLSKKRPRGSFSLTPHSKPKEDVAKDEEEEELQRALAASLEDNNMKESSDDQSTIIPEEVAVEAVTSAVLPTFPPLPEEPKGGDRSLQCRVGIRLPNG…
AtPUX8.1	At4g11740	Arabidopsis thaliana	N/A	MATPNQEAIDTFISITGASDAVALQKLEEHRGDLNQAVNAYFSEGDRNVVREAPVNDDDEMDIDDVIPAPQSPLSMFNAARTIGRPPFSLLDSDFARRVFDSDPLMPRPPFVSHPREVRQIPIEVKDSSGPSGRSSDAPTIEDVTETAHVQGPVTTQGTVIIDEESDDDIPFAPMGRSRQDRPAGSVANNNNQDYNDIEEEMIRAAIEASKKEAEGSSNPLLEERPLHMEDDDDIAIAVTMSLKSAEEEVLRSQGYKASTSEIGASAVTAAQGPQDTQALNGRLAAPSSPFDDDSDDVDEQPLVRHRPRRAASGSLAPPNADRSRSGSPEEEHASINPAERGSGFPSEWGGISSEEHDEAVMLEAAMFGGIPETGYNHLPFLPPQPRAQPRPPSPSLTA…
AtPUX8.2	At4g11740	Arabidopsis thaliana	N/A	MATPNQEAIDTFISITGASDAVALQKLEEHRGDLNQAVNAYFSEGDRNVVREAPVNDDDEMDIDDVIPAPQSPLSMFNAARTIGRPPFSLLDSDFARRVFDSDPLMPRPPFVSHPREVRQIPIEVKDSSGPSGRSSDAPTIEDVTETAHVQGPVTTQGTVIIDEESDDDIPFAPMGRSRQDRPAGSVANNNNQDYNDIEEEMIRAAIEASKKEAEGSSNPLLEERPLHMEDDDDIAIAVTMSLKSAEEEVLRSQGYKASTSEIGASAVTAAQGPQDTQALNGRLAAPSSPFDDDSDDVDEQPLVRHRPRRAASGSLAPPNADRSRSGSPEEEHASINPAERGSGFPSEWGGISSEEHDEAVMLEAAMFGGIPETGYNHLPFLPPQPRAQPRPPSPSLTA…
AtPUX9	At4g00752	Arabidopsis thaliana	N/A	MVSPTRDAIQSYMSITGASESLAIQRLEEHGNNLPEAINAHFRDVERSIYDDSSLDTRSDYNVVEDNNHVRGSETRPVNESRPVPGALPSILSAARAFRPSLLLDPNYRRNILRQLSGSALSGSPSPSSHTGEVTGFPAHSTWGNDHTRPPGLGAVGDGYARHSPSYGSQVHGGTHRDADSPVHSNDAEEEMIRAAIEASKKDFQEGRLNTRYSLDNNPSSVLSPREVINREDEDIARAISMSLEMEEHESVLRDQLAEFMPQSVEHHDPCQSNTNESTRYQPGSSSVQDNREDMNQKQPINSSSQHRHDLQNSEGSYPEEWGGIPSKELQEAIMLEKAIFGGVANESASHNNQLGIHKESQSPNQRVVREEPERKAALPIEPSGENEDAITLLVRMPD…
AtPUX10	At4g10790	Arabidopsis thaliana	N/A	MVDTVDKLGYFQAITGLEDADLCTEILQAHGWDLELAISSFTSSDQDASSSAVDGGGNNRDHDHNNATVTPDYPPRGIVDDTELVMRDDGGGNRGPGVAWRIITLPISIVSGSLGLVSGAIGLGIWAAGGVLSYSLGMLGFRSGRGGGSESARLVSVSSAVGEAMEFVALFDRDYGSNNAFKIDFVVEGFMDALQRSRSSFKLLFVYLHSPDHPDTPVFCGGTLCNEAVVAFVNENFVSWGGSIRSSEGFKMSNSLKASRFPFCAVVMPAANQRIALLQQVEGPKSPEEMLAILQRIVEDSSPTLVTARVEAEERRTNLRLREEQDAAYRAALEADQAREQQRQEEKERLEREAAEAERKLKEEEEARERAAREAEERQAARVRMRQEKALALGEEPEK…
AtPUX11	At2g43210	Arabidopsis thaliana	N/A	MEALSSLTFKGSLPEAIFEAKGKKKLFVVYISGEDEESDKLNRLTWTDASVADSLSKYCILVHIQAGSVDATNFSAIYPYSSVPCIAAIGFSGTQVWRTEGFITAEDLASSLEKAWLGLHIQETTASIFSAALASQNSETPVSSASSVVLPPGSVPLDAAVASPSTASSVQPSETKSTVTSASTTENNDGTVAVKGKESAEPSNLCDTTKNQPAPSVDGTKANVEHEATETPLRVQAEKEPIRPTAPGTNDNTSRVRSSVDRKRKQGTVINEEDSGVGVSGRDINLTKSVDTKETMKPKDEGGEEEDGEKSKKASDVHLNIRLPDGSSLQEKFSVTSILRMVKDYVNSNQTIGLGAYDLAVPYPRKVYTDQDLDKSLSELRLFDRQALVVVPRKRATVY…
AtPUX12	At3g23605	Arabidopsis thaliana	N/A	MLECQSMMEKLSPFVDVASLEIESLRRIKRPKRFSEEESEETENTTNSSNAVFGFPNLPEEPNRDMDQSVLCRICVRLPDGRRIQRSFLKSESVQLLWSFCYSQIGDESSERKRRFKLIQGFPGDYKNLYFGSNTTFEQSGLANSLVSVTWL
AtPUX13	At4g23040	Arabidopsis thaliana	N/A	MATPTQEAIDTFMTITGSSNAVAVRKLEEYRGNLNRAVNAYFTHGDQNSYDAMDIDDGVTPVLSEARTTDPFPLRDPNFGRSLFDNDPVMSRPPFVSHPREAREIPIEVKDSNGPSGQSNDAPTIEDVTETAQAHGPAAQEAVIIDEVSDDDNQSAPTGQSRHAVPVGSAENNMQHYNDIEEQIIRAAIEASKMETGDDVTKSVTVQSAEREVLRSEGWKASSSEREASEMVSIPVQQGSRASNGRFAAPSSLSEDDDDDDDDDPDYVEEEEEPLVSHRPRRAVSGSRSSLNDDLPRSPEAEDATIHSPGAGNGFPSEWGGISSEEHDEAIMLEAAMFGGISESEYGVPYAHYPQRTQRPPSPSLTAQRLIREQQDDEYLASLEADRVKAEARRLEEEA…
AtPUX14	At4g14250	Arabidopsis thaliana	N/A	METATRTHQQRKLISSFLDITVNQTVEIATQFLEATTWNLEDAINLFLIARRNPHHHHGEELVPLPLPSKKNTLYDYDPFMSHNTSVAVCPEEIWDDESTSEESDSRLSSLYRPPPSLFFHGSFEDAKATSSREDLWLLVYDDTSEGQKISTFYKIDSVPPVVLLIDPITGQKMRMWSGVIEPQGFLEDLMKYMDSGPHEHVASLTSNKRMKTEKISCSSNNADDQDMATFWGNAIEEEKTVIKSGKEETFTSDRVVAPSWGPEFEDIMTLSEHEEETCLSCDLLEFPVLTEEPKADCDRSVVCSICVRFPDGRRKQRKFLKSEPIQLLWSFCYSHMEESEKKEFKLVQAIPGASKTLDYGAKATFDQSGIANSMISVTWE
AtPUX15	At1g59550	Arabidopsis thaliana	N/A	MESNYQRTLVSAFLNISVDQTVETAIKCLKSTNWKLEDAINLLFAIDRMRNNQTLTLKPSDSTRLPSLSPPPPLNLLFNGSFEDAKLASSSKDLWLLVHIQSETEFPCNTFNRDLWSNEDVSQALEFRGEIKAKGFLKDLKKYIDASPHEHIASTARNMRVKAEKICHSDQQDMGNLSSDSVVVSSCGREFDDVVTLSEDEEETCLSSDLFEFPVLTKEPKGDCDRSVVCSISVRFPNGRRKQRKFLKSEPVQLLWSFCYSHMDESDNKAFKLVQAIPGASKTLDYGAEASFDQYGIANSIISVTWE
AtPUX16	At4g14245	Arabidopsis thaliana	N/A	MYREVVDSTTSGTSDDSDSRSSFSFPPPSYILHEGLFEYAKYVSIEKNLWLVVNLQSRTELGSHILNRDVWANDAVSRTIESHFIVWQVYDDTNEGQKISSFYKIEAPPPVVFVINPITGQKMHMWSGVIEAESIVEDLMMFWDAGPHENIASLTRNRRTETAETCLSSYNFYETPAPSWGEEFEEEDNWSSRSNNNQVVAPTWEKELEEQDEWEIWSSRSDTDDFVPPFMGDEYEDPDEVKEEEICLVFPVLTEEPKGDCDRSVVCSLCVRFPDGRRKQRKFLKSEPIQLLWSFCYSHIDESEKKAFKLVQAIPGASKTLDCEADATFDQSGLANSLISVTWE
NaPUX8B	EnsemblPlants: A4A49_32907	Nicotiana attenuata	N/A	MARPNQEAIDTFMSITGVSETTAIQKLEEHGGDLNEAVNAHFNQGDSNRIHAAPLAAAPDEDAMEIDDPITEEFRGPPFSVLSSSRSPNPFSLLDPNFTRSMFDTDLTSRAPFVSHPRQVREIPIEVKDGDGQSGHSRNAPIIEDVTDTEQTHGPETRGTVIVDDDDDEVVPSPLSTHAARHRDRTNDVIFDGDSTAAFSRPSAPGDNVLPDYTNDIEEEMVRAAIEASKRDAEMSNQQLDVNNDLRDPTPQPRQSHLEDAQLAHAVSLSLKTAEQEKAIHELGSKAISEPEGYKPAEEDERGKSITSNGRQFRSEVGSSSVPDEAEDLEEEPLVWRRRKPISSGSETAQDIEEHVVSPLSSPRQHDNLNHSLRNGADFPSDEWGGISSLEHDEAVMLE…
GmPUX8B	EnsemblPlants: GLYMA_17G131100	Glycine max	N/A	MARPNQEAVETFVSITGLTEAVALQKLEEHGGNLNEAVNAHFSEGDRNLTTGSRNSSAVFPQDDFMDIDDQHDAGIPRIPSLLPALAANVNPFSLLDPTIGRGIFGTRFDSTIEAPFVTHPREVREIPIEVKDGSQSTPQAGHVPSIEDVTGTVDAHGPDIHGTVIIDDEDDDDIPPAQIAHQDEQTQKILADTSLNSSVRPSAPESENLPDYSNDIEEEMIRAAIEASKQEAEENYRNHKLDRQIDLSESGSQPRQSYLEDPELAHAVSLSLKTAEQEKALRVHGGDSGSPTAGPSKSSEAGLGEVTSNGRLQAGSLSFHDEAEDVEEQPLVRNRSRHMSSGSTGLGKDVELAEASTLPSTATVTATQDSSNPHHNGNSFPDEWGGISSEEHDEAVML…
MtPUX8B	EnsemblPlants: MTR_4g102810	Medicago truncatula	N/A	MATPNQETIDTFISITGVSQPIALQKLQEHGGSLNEAVNAYFSEGDRNLMASSATVPQGDFMDIDDQHDEILRPPSLLSFARNLDPFSLIDPTIGRSILDTHLGATNQAPFVTHPREVRQIPIEDKDGSQSTPQAGHIPIVEDVTGTVHAQGPDIHGSVIVLDDDDDDNTLPAPTHSSPDSSARPSAPTLENLPDSSNDIEEEMIRAAIEASRREAEENYSNHELDRQIDVSESGPNPRQSLLEDPELAHAVSLSLKTAEQEKARRVQEGDVGAPTAGPSKAQGVELGEVSSNGRLQAGEDEDEEDEDVEEMPLVRNRSTRHVSLSSTGSGKDAELIESSTPAGTTVPESSSPPHNDNSFPSDEWGGMSSVEHDEAVMLEAAMFGGIPEGSGYRRAYAP…
CrPUX8B	EnsemblPlants: Cre03.g200100	Chlamydomonas reinhardtii	N/A	MADAPPDELAVSRLQMMAHCDEVQARFLLEAAGGNLELALQMALENSDMGDAYAHHTQQQFHAPPAAQPRPGSAAFAGPLPPRPRAPALRTQAPGAAGTAGPGAAAGGGGAAVAGPPAALAAPLGLLGFMLRVPFMALGLGFRIMRFTVVNGLHAAAVVGDRVLPAPVMRAARGAVSAIATAAAGGADLDPSEQAAAFVADFKSAYGDRHPRWQESGWRVASQQARREFRFLFVYLHSPEHEDTDKFCRQVLTNPDAVDYINTHFVSWGGDVSYSDAFILSQQAQMGCTRFPFIALLSLSPHDSRPALVASASGQDIAADPAALLVLLRAAVMEHGVMLAAARAEVEEREHARRLVVEQDAEYEASLAADRAREAERAEERKRQEEEERKRADEERAAR…
ZmPUX8B.1	EnsemblPlants: Zm00001eb103170	Zea mays	N/A	MARPLQEAIDTFISITGADEAVAVRKLEEHGGDLNRAINSHFNDGDSILNGISQNTMPTSHDDMMDLDGPLDNTFQRSLFPENFRDPFALMDPNFQHQFFDRVGSTDGVTRGPLVSHPREVREIPIEVKDSDPQTSPSGQAPVIEDVTGHESSNGLEVHETIIIDDEDSGLLSAPSAPHASVPSNTSSEPTAPPLVHVNDYDDDIEEEMIRAAIEASKKDSEGLANIAEQGDQHQEGVNLGEHSSDKAVMRTTDGIVERQVLASGKAGTSRQPIDEESFQEETEDVEEQPLVRRRSRRAPSENTELAQMPHPGASPVLNNHQSSGGDFPSEWGGISSEEHDEAVMLEAAMFGGVFGRPMHPFSMPSHRSSTYYPQITHSSSPALAEQRLLREQQDDEYL…
ZmPUX8B.2	EnsemblPlants: Zm00001eb103170	Zea mays	N/A	MARPLQEAIDTFISITGADEAVAVRKLEEHGGDLNRAINSHFNDGDSILNGISQNTMPTSHDDMMDLDGPLDNTFQRSLFPENFRDPFALMDPNFQHQFFDRVGSTDGVTRGPLVSHPREVREIPIEVKDSDPQTSPSGQAPVIEDVTGHESSNGLEVHETIIIDDEDSGLLSAPSAPHASVPSNTSSEPTAPPLVHVNDYDDDIEEEMIRAAIEASKKDSEGLANIAEQGDQHQEGVNLGEHSSDKAVMRTTDGIVERQVLASGKAGTSRQPIDEESFQEETEDVEEQPLVRRRSRRAPSENTELAQMPHPGASPVLNNHQSSGGDFPSEWGGISSEEHDEAVMLEAAMFGGVFGRPMHPFSMPSHRSSTYYPQITHSSSPALAEQRLLREQQDDEYL…
ZmPUX8B.3	EnsemblPlants: Zm00001eb103170	Zea mays	N/A	MPHPGASPVLNNHQSSGGDFPSEWGGISSEEHDEAVMLEAAMFGGVFGRPMHPFSMPSHRSSTYYPQITHSSSPALAEQRLLREQQDDEYLASLQADQEKELKALQDAELHRLEETTTREVALKKQKQEQEERRKKQLEEEELESSLASKQASLPSEPPPDAEGAVTVVVRMPDGSRQGRCFLKTDKLKFLFDFLDIGRICKPGTYRLVRTYPRRTFTSSEGDVSFSDLGLTSKQEALFLEQITE
BdPUX8B.1	EnsemblPlants: BRADI_3g42080v3	Brachypodium distachyon	N/A	MARPTQEAIDTFVGITGADEAVAVRKLEEHSGDLNEAVNAYFNEGDRSTTVINRNPIAHNYDDMMDLDEPFDPTFGRPLGNPFDILDPGFAERAAAGFFGRGPQVTHPREVRQIPIEVKDDNPHTGSSGQGPVIEDVTGRESSYGPEVHGTVVVDEDDDDDDLLPAHAPNIQRNTSGTYYSAPSAPPLTDVNDYNNDIEEEMIRAAIEASKRDTEGPTNAAERERVLRQEGMPVVDNSSDLSDKEDIEGASEAVERQGLTAGKVGTSRQSVGAENSQDDIEDFEEEPLVRQRSRRALSRNSEPAEAVQRTDSPPSSPQPHGTESVYAHHGGFPPEEWGLISNEEHDEAVMLEAAMFGGIPEHTAFQFPRPSHGISTSYPRVAHPPSPTLTAQRLLREQQ…
BdPUX8B.2	EnsemblPlants: BRADI_3g42080v3	Brachypodium distachyon	N/A	MMDLDEPFDPTFGRPLGNPFDILDPGFAERAAAGFFGRGPQVTHPREVRQIPIEVKDDNPHTGSSGQGPVIEDVTGRESSYGPEVHGTVVVDEDDDDDDLLPAHAPNIQRNTSGTYYSAPSAPPLTDVNDYNNDIEEEMIRAAIEASKRDTEGPTNAAERERVLRQEGMPVVDNSSDLSDKEDIEGASEAVERQGLTAGKVGTSRQSVGAENSQDDIEDFEEEPLVRQRSRRALSRNSEPAEAVQRTDSPPSSPQPHGTESVYAHHGGFPPEEWGLISNEEHDEAVMLEAAMFGGIPEHTAFQFPRPSHGISTSYPRVAHPPSPTLTAQRLLREQQDDEYLAALQADREKELKAVEEAEVRRLEEAAAREAAIEKQKQENDEKLRKQLEEEELESMLAA…
OlPUX8B	EnsemblPlants: OSTLU_34809	Ostreococcus lucimarinus	N/A	MFHDGDTSRGVHFVQLSHREAVAFAQRETKLLFVYLHAPAHHESELFCAQVLADPTMTAYVNQNFVAWGGNVRDGDAFSLSAGLKPTGYPCVAILDSVSGGSGSASLVMSCEGFIDVDVLISACEEALAGQNASLDDARARHAEVDASRRLREEQDAAFAESLARDAARARELDAQREAEEAERRRVEEERRAVEEETKKAEEAERQRVEEIEARRASKASKLRDEPADGADGVSKLAVRLPDGSRAERRFHSTDTIADVYDFVDTLEELDEVSYSLVTNFPRRTFARSERVSLVDAGVHPNGAMFVQTESS
TaPUX8B	EnsemblPlants: TraesCS5A02G313200	Triticum aestivum	N/A	MARPQQEAIDTFISITGADEAVAIRKLEEHAGDLNQAVNAHFTEGDSTVNAINQSIPPVNHDDMELDGPLDNTFQRPLFPEALHDPFALMDPNFQQMFFDSVGSAGTPNRDAQGPHPREICNEVNDNNIHMGPSGQASVVENVTGHGSSYGPEVRETIIIDDDEEELSSGLSSQHASIRSNASQPNPLPTAPPLVHVTDNDIEEEMIRAAIEASKREAEELANTAEQERTQHMGGINLEDRLSDEDMESAAGTVRRQGLGTGRSGTTMQPADEESSDDEIEDVEEQPLVRRRSRRIPSGDTESTEPVLPGDSPPSSSQPQNLDHQYNRTDFPSEWGGISSEEHDEAVMLEAAMFGGIPEAPTYPLSVPSHASSSHYPQVVHSPPPELTEQRLLREQQDD…
SmPUX8B	EnsemblPlants: SELMODRAFT_63727	Selaginella moellendorffii	N/A	MVRAAIEASKMDPETGADSASQSVPGTEDDDIARAVSLSLKRFTLDCRGREEVSRFTLAAGRYSKVWGENPSTGPSSFPTRNVIQEPEETPDEQPLLRRRQRRVVPIVEEPAAEEAFERQPRSADEEHRPSAPQPNGDVIPADEWAGISSEEQDEAVMLEAAFFGGLPDIQYRPTPEFAAASAADVSSSRPQQPLSPSVVAQRLLREQQDDEYLASLAADREKEVKAKQDAEAASEMEKLRRQEEQRRSEAAAELERKLATKAESLPAEPTQEDDQAVTILVRLPDGSRHGRRFRKSDKLQNLFDFIDLSRAVEPGTYRLVRQYPRRAFTGDDHAASFDSLGLTSKQEALFLETI
SbPUX8B	EnsemblPlants: SORBI_3002G270500	Sorghum bicolor	N/A	MARPPQEAIDTFISITGADEAVAVRKLEEHGGDLNRAINSHFNDGDSISNGISQNTMPASHDDMMDLDGPLDNTFQRPLFPENSHDPFALMDPNFQRQFFDRVGSTDGVSHGPLVSHPREAREIPIEVKDSDPQTGPSGQAPVIEDVTGNESLNGPEVPETIIIDEEDGGLLSAPSAPHASIPSITSSVPTAPPLVHVNDYDDDIEEEMIRAAIEASKKDSEALANIVEQGGDQHQEGVNLEEHSSDKAGMGTTDGIVERQGPASGKAGTSRQPIDEEGFQEETEDVEEQPLVRRRSRRVPSENTELAQIVHPGASPVRNDRQYNNGDDFPSEWGGISSEEHDEAVMLEAAMFGGVPEGPTYPFSMPSHRSSTYYPPIAHSPSPALTEQRLLREQQDDE…
OsATG8a	LOC_Os07g32800	Oryza sativa japonica	N/A	MARTSFKLEHPLERRQAESARIREKYSDRIPVIVEKADKTDVPEIDKKKYLVPADLTVGQFVYVVRKRIKLSPEKAIFVFVKNTLPPTASLMSAIYEENKDEDGFLYMTYSGENTFGSA
OsATG8b	LOC_Os04g53240	Oryza sativa japonica	N/A	MAKSSFKLDHTLERRQAEANRIREKYSDRIPVIVEKAERSDIPDIDKKKYLVPADLTVGQFVYVVRKRIKLSPEKAIFIFVKNTLPPTAALMSAIYEENKDEDGFLYMTYSGENTFGLL
OsATG8c	LOC_Os08g09240	Oryza sativa japonica	N/A	MARSSFKLEHPLERRQAEANRIREKYPDRIPVIVEKAERSDIPDIDKKKYLVPADLTVGQFVYVVRKRIKLSAEKAIFIFVKNTLPPTAALMSAIYEENKDEDGFLYMTYSGENTFGLFV
OsATG8a ΔLDS	N/A	Oryza sativa japonica	OsATG8a Y50A, L51A	MARTSFKLEHPLERRQAESARIREKYSDRIPVIVEKADKTDVPEIDKKKAAVPADLTVGQFVYVVRKRIKLSPEKAIFVFVKNTLPPTASLMSAIYEENKDEDGFLYMTYSGENTFGSA
OsATG8a ΔUDS	N/A	Oryza sativa japonica	OsATG8a I77A,F78A,V79A	MARTSFKLEHPLERRQAESARIREKYSDRIPVIVEKADKTDVPEIDKKKYLVPADLTVGQFVYVVRKRIKLSPEKAAAAFVKNTLPPTASLMSAIYEENKDEDGFLYMTYSGENTFGSA
ScCDC48	GenBank: NP_010157.1	Saccharomyces cerevisiae S288C	N/A	MGEEHKPLLDASGVDPREEDKTATAILRRKKKDNMLLVDDAINDDNSVIAINSNTMDKLELFRGDTVLVK GKKRKDTVLIVLIDDELEDGACRINRVVRNNLRIRLGDLVTIHPCPDIKYATRISVLPIADTIEGITGNL FDVFLKPYFVEAYRPVRKGDHFVVRGGMRQVEFKVVDVEPEEYAVVAQDTIIHWEGEPINREDEENNMNE VGYDDIGGCRKQMAQIREMVELPLRHPQLFKAIGIKPPRGVLMYGPPGTGKTLMARAVANETGAFFFLIN GPEVMSKMAGESESNLRKAFEEAEKNAPAIIFIDEIDSIAPKRDKTNGEVERRVVSQLLTLMDGMKARSN VVVIAATNRPNSIDPALRRFGRFDREVDIGIPDATGRLEVLRIH…
OsCDC48-1	LOC_Os03g05730	Oryza sativa japonica	N/A	MASQGEPSSSSDPKGKKDFSTAILERKKSPNRLVVDEATNDDNSVIGMHPDTMEKLQLFR GDTVLLKGKKRKDTICIVLADDTCEEPKIRMNKVVRKNLRVRLGDVVSVHQCPDVKYGKR VHILPIDDTVEGITGNLFDAFLKPYFLEAYRPLRKGDLFLVRGGMRSVEFKVIETDPAEY CIVAPDTEIFCDGEPIKREDEERLDEVGYDDVGGVRKQMAQIRELVELPLRHPQLFKSIG VKPPKGILLYGPPGSGKTLIARAVANETGAFFFLINGPEIMSKLAGESESNLRKAFEEAE KNAPSIIFIDEIDSIAPKREKTHGEVERRIVSQLLTLMDGLKARSHVIVMGATNRPNSID PALRRFGRFDREIDIGVPDEVGRLEVLRIHTKN…
OsCDC48-2	LOC_Os10g30580	Oryza sativa japonica	N/A	MASQGEPSSSADPKGKKDYSTAILERKKSPNRLVVDEATNDDNSVVALHPDTMERLQLFR GDTVLLKGKKRKDTICIVLADETCEEPKIRMNKVVRKNLRVRLGDVVSVHQCQDVKYGKR VHILPIDDTVEGITGNLFDAFLKPYFLEAYRPVRKGDLFLVRGGMRSVEFKVIETDPTEY CIVAPDTEIFCDGEPIKREDEERLDEVGYDDVGGVRKQMAQIRELVELPLRHPQLFKSIG VKPPKGILLYGPPGSGKTLIARAVANETGAFFFLINGPEIMSKLAGESESNLRKAFEEAE KNAPSIIFIDEIDSIAPKREKTNGEVERRIVSQLLTLMDGLKARSHVIVMGATNRPNSID PALRRFGRFDREIDIGVPDEVGRLEVLRIHTKN…
OsCDC48-3	LOC_Os08g31870	Oryza sativa japonica	N/A	MADADVSSSKTTTARDYSTAILECAKKKSPNRLMADDAEGGVAVDNSTVTLSEATMEELG IFRGDLVTLRGRRRREAVCYAQKDESCPDGRLRLSRGVRSNLHVRLGDLVTVKPCPTIRN AKRVQLRPFDDSVEGISGDLFEPYLKPYFMDALRPVKKGDRFLVRGHMHAVEFKVMDTEP NNEPVIVAGDTEIFCDEGDPVKREDEERLDGPGYDDVGGVRKQLAQIRELVELPLRHPKL FQTLGVRPPKGILLYGPPGTGKTLLARAIAAESGAHFVVVNGPEIMSGMPGESEANLRAV FAEADAAAPSIVFMDEIDSIAPSREKAHGEVERRVVSQLLTLMDGLRPRAQVIVIGATNR PNSLDPALRRFGRFDRELDIGVPDELGRLEILR…
OsCDC48-4	LOC_Os04g52690	Oryza sativa japonica	N/A	MVEATRQRRKPLVLASTQALLDSLPGDRRGSALPPPPPPEPVRIRAGVLRFPNSSSSSSS AGGGEFGEAASFVALPSSALRRLAVVTGTPVLVKNADNNVGRIAKAVVLDHPCLDDSLTE HTEPVDAASPLDNAMGILPCRSFPTNGFPPLDEEVAYVSPLLAFNLGVHVSCLKLLVQKG EKPFKFCSKVEDSDLAAGEESNPILHLEILPSPQVPKHALHLRVSVVRIPECGVFASLKA NSAIGGSDYQDMIDQALNEHFKFDRFLARGDVFCIRNNWNCGATSCLACNREDNRLHPHD MIYFKVTGMEPSDEPVHRVNCNQTALVLGGGASASIPPYSLFASPGASVPLHSEIVEHLA SIIAPALCPSNILPKVKFSTFLYGPSGCGKRTV…
OsCDC48-5	LOC_Os06g01980	Oryza sativa japonica	N/A	MGKRARHGGSGRSHSPYFESQLRRLITDGGLSSSSAEDVAIALRSRFPEFRRHKLDPFTS AVRRALNSIPSDSHSDSADDSHASTPSQRRRRRPRHDAHATASSSTSLSDDAAHPPPPPI YDVTKSMLRTQYASQTPKRDTGSNQQLEIEIAAEKPRRLITSDGGAGGEAKPESAPPSEG GDRGGKGPTFSDLGGMESVIEQLMMEVVVPLCHPEVPRWLGVKPVAGLLLHGPPGCGKTT LAHAIANETGVPFYKISAPEVVSGVSGASEENIRSLFKKAYRTAPSIVFIDEIDAIASKR ENLQREMERRIVTQLMTCMDEYHQQIGSGSGDVGSESAEKKPGYVIVIGATNRPDAVDQA LRRPGRFDREISLGVPDEYARKKILMMLTRNLR…
OsCDC48-6	LOC_Os04g42110	Oryza sativa japonica	N/A	MEEVRGRESKDHRGGGGGGGGDGDGERTGRWRAEEVIAGNRAVLEALRELVMYPVLYARE ARVLGLNFPRGLLLHGPSGTGKKSMVRAVVRECNAHLTVIDSISVHKPHAGEGEKFMREA FTEAYSQASQGRPAVIFIDELDDICPPRGSRREQGSRIVGQLLTLMDGKSSKLLPHLVVV ASATRVDAIESALRRPGRFDSEIEVTVPTAEERFEILKLYTKNLHLGECVDLQSVAASCN GYVGADLQALCREAARRAYGRLSSSSESENVLTLIMEDWESAKSVAKNSVTRGVTKEIPA VSWDDIGGLKAVKKKLQQAVEWPIKHAASFDRLGISPIRGVLLHGPPGCSKTTLAKAAAH AAQASFFSLSGAELYSKYVGEGEALLRRTFQMA…
OsCDC48-7	LOC_Os05g31220	Oryza sativa japonica	N/A	MDGKSSKLLPHLVVASATRVDAIESALRRPGRFDSEIEVTVPTAEERFEILKLYTKNLHL GECVDLQSVAASCNGYLGADLQALCREAARRAYGRLSSSSESENVLTLIMEDWESAKSVA KNSVTRGVIKEIPAVSWDDIGGLKAVKKKLQQAVEWPIKHAASFDRLGISPIRGVLLHGP PGCSKTTLAKAAAHAAQASFFSLSGAELYSKYVGEGEALLRRTFQMARLASPSIIFFDEA DAIAPKRTGPSGNSSGNATVGERLLSTLLTEMDGLELATGIIVLAATNRPNAIDAALLRP GRFDMVLYVPPPDAEGRYEILRIHTRKMPLGDDVDLWKVAERTELFTGADLEGLEGKSEA ALRSLRPSLTQSVVDEYSNAAIHGPLTRRKH
OsCDC48-8	LOC_Os09g33980	Oryza sativa japonica	N/A	MVGMEGKGDASVTPVRTSDRLRKRPKYFGRNYMYYNPAIRKKMKSKKRAAASQIAKKLLR KSAARAPPADSIAANLRRSTRKRRMSVNLEDYDTDSSSMEDDDLMRPRYRSSKNKVDDEV SARPKRKKLSNSSSIPRREGLRPRRSIRGQRLHPYQESEDDQESSEEQPAQDRRENGNDI EEDGNEEEVDGGDEAEADGDDEDGEEEQEGRRRYDLRDRSEVRRPSPRKEGKHRTQSPRR VLVHGIGPKNSKYLKKGGSRMHKRPRFSLPDDSDDSLLVDEPDEGPSMPWMRGGRGGMPW FLGGLDMHCPGAWGLNVGASGWGHQGDNTVSTSSLMPGIQTAGPSSKGGADIQPLQVDGS VSFNDIGGLSDYIDALKEMVFFPLLYPDFFANY…
OsSTI	LOC_Os02g43020	Oryza sativa japonica	N/A	MADEAKAKGNAAFSAGRYEEAARHFTDAIALAPGNHVLYSNRSAALASVHRYSEALADAEKTVELKPDWAKGYSRLGAAHLGLGDAASAVAAYEKGLALDPTNEGLKAGLADAKKAAAAPPRRPPPSGVDGIGQMFQGPELWTKIASDPTTRAYLEQPDFMQMLRDVQRNPSSLNMYLSDPRMMQVLGLMLNIKIQRPEASESSQPSSSPPSQPQEQPEAKAREVEPEPEPEPMEVTDEEKERKERKSSAQKEKEAGNAAYKKKDFETAIQHYTKAMELDDEDISYLTNRAAVYIEMGKYDECIKDCDKAVERGRELRADFKMISRALTRKGTALAKLAKTSKDYDIAIETFQKALTEHRNPDTLKKLNEAERAKKELEQQEYYDPKLADEEREKGNQL…
OsBHT	LOC_Os01g55270	Oryza sativa japonica	N/A	MSADELRLDLEELRRLEGLAKRPRVLSALANEIRAVDAKLAKATEPQAPQAVAAGSPPVVAAAAAPAPAAAAGVSYVTLGSFSWDQDAEKIKIYVFLEGVEQDKVETTFKPMSVDTKFHDVKGKNYRCAIPKLHKEIVPEKCKVLVKPTKIIVTLYKASKGNWLDLHFKEDKFKPSMAKEKDPMSGIMDLMKNMYEEGDEDMKRTIAKAWSDARSGKTADSVRGLP
OseIF5A	LOC_Os03g55150	Oryza sativa japonica	N/A	MSDSEEHHFESKADAGASKTYPQQAGTIRKNGHIVIKNRPCKWSGNHASLLVDTKVVEVSTSKTGKHGHAKCHFVAIDIFNGKKLEDIVPSSHNCDVPHVNRTDYQLIDISEDGFVSLLTESGGTKDDLRLPSDEALLTQIKDGFAEGKDLIVTVMSAMGEEQICALKDIGPKN
